# Supplementary material for: RBV, an evolutionarily conserved WD40 repeat protein, promotes microRNA biogenesis and loading into ARGONAUTE1 in Arabidopsis
Source: Research Square preprint supplement (doi:10.21203/rs.3.rs-536724/v1), 2021-06-02
Supplement: Supplementary file 3 [file 78fcdba3f7a4c9784e586108.xlsx]

## Sheet: Supplementary Data 7
Supplementary Data 7. Expression of 157 miRNA targets in rbv-1 vs. Col.
Locus_Identifier	FC	log2FoldChange	lfcSE	stat	pvalue	padj	Col_1_total	Col_2_total	Col_3_total	rbv-1_1_total	rbv-1_2_total	rbv-1_3_total	Gene Model Type	Primary Gene Symbol	Gene Model Description
AT2G28190(CSD2)	5.13397	2.36007	0.100905	23.389	5.54e-121	1.3e-117	578.345	487.157	468.393	2659.55	2672.44	2458.11	protein_coding	COPPER/ZINC SUPEROXIDE DISMUTASE 2 (CSD2)	Encodes a chloroplastic copper/zinc superoxide dismutase CSD2 that can detoxify superoxide radicals. Its expression is affected by miR398-directed mRNA cleavage. Activation depends totally on CCS. Overexpression of a miR398-resistant form of CSD2 leads to more dramatic improvements in stress (hight light, Cu2+ and methyl viologen) tolerance than overexpression of wild-type CSD2. The mRNA is cell-…
AT5G10180(SULTR2;1)	0.550465	-0.861278	0.0655357	-13.1421	1.89e-39	2.42e-37	6936.28	6618.2	7083.09	3998.08	3634.38	3744.55	protein_coding	SULFATE TRANSPORTER 2;1 (SULTR2;1)	Encodes a low-affinity sulfate transporter expressed in the root cap and central cylinder, where it is induced by sulfur starvation. Expression in the shoot vascular system is not induced by sulfur starvation.
AT1G30490(PHV)	1.86701	0.900727	0.0796835	11.3038	1.26e-29	8.43e-28	1445.86	1580.29	1624.32	3083.54	2856.57	2787.67	protein_coding	PHAVOLUTA (PHV)	Dominant PHV mutations cause transformation of abaxial leaf fates into adaxial leaf fates. Has overlapping functions with PHABULOSA, REVOLUTA and CORONA/ATHB15 in patterning the apical portion of the embryo. Encodes a member of HD-Zip family which contains homeodomain-leucine zipper domains and domain similar to a mammalian sterol binding domain.
AT1G08830(CSD1)	2.13476	1.09408	0.104176	10.5022	8.44e-26	4.19e-24	694.014	730.735	730.886	1732.74	1484.21	1412.02	protein_coding	COPPER/ZINC SUPEROXIDE DISMUTASE 1 (CSD1)	Encodes a cytosolic copper/zinc superoxide dismutase CSD1 that can detoxify superoxide radicals. Its expression is affected by miR398-directed mRNA cleavage. Regulated by biotic and abiotic stress. Activation of CSD1 in the cytoplasm involves both a CCS-dependent and -independent pathway.
AT3G15030(TCP4)	0.418222	-1.25766	0.129578	-9.70578	2.85e-22	1.08e-20	4881.23	4035.88	4027.7	1538.26	1962.6	1896.14	protein_coding	TCP FAMILY TRANSCRIPTION FACTOR 4 (TCP4)	Arabidopsis thaliana TCP family transcription factor. Regulated by miR319. Involved in heterchronic regulation of leaf differentiation.
AT2G41720(EMB2654)	1.39113	0.476261	0.0501322	9.50009	2.1e-21	7.53e-20	2914.86	2869.47	2880.19	4078.68	4054.26	3925.25	protein_coding	EMBRYO DEFECTIVE 2654 (EMB2654)	Encodes a pentatricopeptide repeat protein that is essential for trans-splicing of a chloroplast small ribosomal subunit transcript.
AT1G52070(Mannose-binding_lectin_superfamily_protein)	0.390016	-1.3584	0.146124	-9.29621	1.46e-20	4.9e-19	320.017	271.303	273.33	101.617	120.458	109.098	protein_coding	Mannose-binding lectin superfamily protein	Mannose-binding lectin superfamily protein;(source:Araport11)
AT2G33810(SPL3)	0.389163	-1.36156	0.147655	-9.2212	2.94e-20	9.61e-19	478.098	611.917	591.211	185.713	228.009	236.378	protein_coding	SQUAMOSA PROMOTER BINDING PROTEIN-LIKE 3 (SPL3)	Encodes a member of the SPL (squamosa-promoter binding protein-like)gene family, a novel gene family encoding DNA binding proteins and putative transcription factors. Contains the SBP-box, which encodes the SBP-domain, required and sufficient for interaction with DNA. It binds DNA, may directly regulate AP1, and is involved in regulation of flowering and vegetative phase change. Its temporal expr…
AT3G44860(FAMT)	0.260606	-1.94006	0.216576	-8.95784	3.31e-19	9.89e-18	1025.6	815.889	1414.81	238.273	309.748	297.746	protein_coding	FARNESOIC ACID CARBOXYL-O-METHYLTRANSFERASE (FAMT)	Encodes a farnesoic acid carboxyl-O-methyltransferase. The mRNA is cell-to-cell mobile.
AT2G25980(Mannose-binding_lectin_superfamily_protein)	0.330398	-1.59772	0.178937	-8.92896	4.3e-19	1.27e-17	381.707	295.067	269.717	101.617	108.412	98.8698	protein_coding		Mannose-binding lectin superfamily protein;(source:Araport11)
AT2G34710(PHB)	1.41416	0.499949	0.0601923	8.30587	9.91e-17	2.29e-15	2170.72	2289.24	2221.55	3286.77	3090.6	3097.92	protein_coding	PHABULOSA (PHB)	Dominant PHB mutations cause transformation of abaxial leaf fates into adaxial leaf fates. Encodes a member of HD-Zip family which contains homeodomain-leucine zipper domains and domain similar to a mammalian sterol binding domain. Has overlapping functions with PHAVOLUTA, REVOLUTA and CORONA.
AT5G39610(NAC6)	2.47656	1.30834	0.157987	8.28129	1.22e-16	2.77e-15	100.246	108.917	114.389	276.817	237.474	295.473	protein_coding	NAC DOMAIN CONTAINING PROTEIN 6 (NAC6)	Encodes a NAC-domain transcription factor. Positively regulates aging-induced cell death and senescence in leaves. This gene is upregulated in response to salt stress in wildtype as well as NTHK1 transgenic lines although in the latter case the induction was drastically reduced. It was also upregulated by ABA, ACC and NAA treatment, although in the latter two cases, the induction occurred relativ…
AT1G62630(CC-NBS-LRR_class)	1.41724	0.503089	0.0619825	8.11663	4.79e-16	1.02e-14	1538.4	1596.13	1572.55	2184.75	2177.7	2306.96	protein_coding		Disease resistance protein (CC-NBS-LRR class) family;(source:Araport11)
AT1G48410(AGO1)	0.803628	-0.315401	0.0393804	-8.00909	1.16e-15	2.35e-14	10121	10164.9	10324.5	8213.42	8189.41	8206.2	protein_coding	ARGONAUTE 1 (AGO1)	Encodes an RNA Slicer that selectively recruits microRNAs and siRNAs. There is currently no evidence that AGO1 Slicer is in a high molecular weight RNA-induced silencing complex (RISC). Mutants are defective in post-transcriptional gene silencing and have pleiotropic developmental and morphological defects. Through its action on the regulation of ARF17 expression, the protein regulates genes invo…
AT1G52060(Mannose-binding_lectin_superfamily_protein)	0.292577	-1.77311	0.225987	-7.84608	4.29e-15	8.2e-14	196.637	180.208	183.022	31.5362	65.3913	59.0946	protein_coding	Mannose-binding lectin superfamily protein	Mannose-binding lectin superfamily protein;(source:Araport11)
AT3G15640(Rubredoxin-like_superfamily_protein)	1.42045	0.506347	0.0662585	7.642	2.14e-14	3.78e-13	1418.87	1413.94	1428.06	2133.95	1954.86	1981.94	protein_coding		Rubredoxin-like superfamily protein;(source:Araport11)
AT3G09220(LAC7)	0.581256	-0.782755	0.106356	-7.35976	1.84e-13	2.93e-12	694.014	598.054	590.006	378.434	349.327	361.386	protein_coding	LACCASE 7 (LAC7)	putative laccase, a member of laccase family of genes (17 members in Arabidopsis).
AT5G43780(APS4)	0.687396	-0.540787	0.0746009	-7.24906	4.2e-13	6.45e-12	2706.65	2457.57	2531.01	1857.13	1677.8	1756.36	protein_coding	(APS4)	sulfate adenylyltransferase, ATP sulfurylase
AT3G15270(SPL5)	0.433421	-1.20616	0.166808	-7.23084	4.8e-13	7.32e-12	181.215	209.913	179.41	71.8324	87.7621	84.0962	protein_coding	SQUAMOSA PROMOTER BINDING PROTEIN-LIKE 5 (SPL5)	Encodes a member of the SPL (squamosa-promoter binding protein-like)gene family, a novel gene family encoding DNA binding proteins and putative transcription factors. Contains the SBP-box, which encodes the SBP-domain, required and sufficient for interaction with DNA. It is involved in regulation of flowering and vegetative phase change. Its temporal expression is regulated by the microRNA miR156…
AT1G69770(CMT3)	1.44212	0.528195	0.0740837	7.1297	1.01e-12	1.47e-11	1233.8	1138.68	1095.73	1699.45	1631.34	1648.97	protein_coding	CHROMOMETHYLASE 3 (CMT3)	Encodes a chromomethylase involved in methylating cytosine residues at non-CG sites. Involved in preferentially methylating transposon-related sequences, reducing their mobility. CMT3 interacts with an Arabidopsis homologue of HP1 (heterochromatin protein 1), which in turn interacts with methylated histones. Involved in gene silencing.
AT3G22890(APS1)	1.76376	0.818651	0.123867	6.60911	3.87e-11	4.6e-10	16995.6	16983.2	17572.6	36045.8	27987.5	26911.9	protein_coding	ATP SULFURYLASE 1 (APS1)	encodes ATP sulfurylase, the first enzyme in the sulfate assimilation pathway of Arabidopsis. It may also participate in selenium metabolism. The mRNA is cell-to-cell mobile.
AT5G60020(LAC17)	0.660506	-0.598356	0.0908736	-6.58449	4.56e-11	5.39e-10	659.313	658.454	685.732	476.546	439.671	421.049	protein_coding	LACCASE 17 (LAC17)	LAC17 appears to have laccase activity based on enzyme assays performed using lac17 mutants. Notably, these mutants appear to have a reduced deposition of G lignin units. LAC17 is expressed in interfascicular fibers and likely contributes to lignin biosynthesis, and hence, cell wall biosynthesis, there.
AT5G42460(F-box_protein)	1.82109	0.864802	0.13201	6.55106	5.71e-11	6.65e-10	138.803	134.661	127.634	252.289	234.032	240.924	protein_coding		F-box and associated interaction domains-containing protein;(source:Araport11)
AT1G52150(ATHB-15)	1.265	0.339134	0.0525984	6.44762	1.14e-10	1.26e-09	2255.54	2194.19	2232.39	2757.66	2832.48	2846.77	protein_coding	(ATHB-15)	Member of the class III HD-ZIP protein family. Contains homeodomain and leucine zipper domain. Critical for vascular development and negatively regulates vascular cell differentiation.
AT5G60120(TOE2)	1.32284	0.403638	0.0631054	6.39625	1.59e-10	1.72e-09	1376.46	1318.89	1308.85	1706.46	1797.4	1768.86	protein_coding	TARGET OF EARLY ACTIVATION TAGGED (EAT) 2 (TOE2)	target of early activation tagged (EAT) 2;(source:Araport11)
AT2G30210(LAC3)	0.530411	-0.914817	0.146075	-6.26265	3.78e-10	3.9e-09	975.475	730.735	748.947	399.458	418.16	471.62	protein_coding	LACCASE 3 (LAC3)	putative laccase, a member of laccase family of genes (17 members in Arabidopsis).
AT4G18390(TCP2)	0.632676	-0.660461	0.106039	-6.22849	4.71e-10	4.76e-09	2155.3	2402.12	2458.76	1299.99	1593.48	1538.73	protein_coding	TEOSINTE BRANCHED 1, CYCLOIDEA AND PCF TRANSCRIPTION FACTOR 2 (TCP2)	TEOSINTE BRANCHED 1, cycloidea and PCF transcription factor 2;(source:Araport11)
AT1G53230(TCP3)	0.621312	-0.686611	0.110732	-6.20064	5.62e-10	5.63e-09	6974.84	5608.25	5588.2	3554.83	3899.39	3817.85	protein_coding	TEOSINTE BRANCHED 1, CYCLOIDEA AND PCF TRANSCRIPTION FACTOR 3 (TCP3)	Encodes a member of a recently identified plant transcription factor family that includes Teosinte branched 1, Cycloidea 1, and proliferating cell nuclear antigen (PCNA) factors, PCF1 and 2. Regulated by miR319. Involved in heterochronic regulation of leaf differentiation.
AT3G17185(TAS3)	0.643927	-0.63503	0.102519	-6.19425	5.86e-10	5.85e-09	514.727	468.344	467.189	313.61	293.401	320.475	other_rna	TRANS-ACTING SIRNA3 (TAS3)	Encodes a trans-acting siRNA (tasi-RNA) that regulates the expression of auxin response factor genes (ARF2, ARF4, ETT). One of 3 genomic loci that encode the TAS3 siRNA. Has been identified as a translated small open reading frame by ribosome profiling.
AT3G05690(NF-YA2)	0.569586	-0.812014	0.134489	-6.03779	1.56e-09	1.48e-08	485.809	388.141	394.943	220.753	236.613	252.857	protein_coding	NUCLEAR FACTOR Y, SUBUNIT A2 (NF-YA2)	Encodes a subunit of CCAAT-binding complex, binds to CCAAT box motif present in some plant promoter sequences. One of three members of this class (HAP2A, HAP2B, HAP2C), it is expressed in vegetative and reproductive tissues.
AT1G63360(CC-NBS-LRR_class)	1.46815	0.553998	0.0936506	5.91559	3.31e-09	3e-08	2136.02	2371.42	2505.72	3724.77	3285.05	3324.07	protein_coding		Disease resistance protein (CC-NBS-LRR class) family;(source:Araport11)
AT5G60690(REV)	1.26062	0.334134	0.0585344	5.70833	1.14e-08	9.56e-08	1839.14	1754.56	1780.86	2197.02	2252.56	2302.42	protein_coding	REVOLUTA (REV)	REVOLUTA regulates meristem initiation at lateral positions. a member of a small homeodomain-leucine zipper family. Has overlapping functions with PHAVOLUTA and PHABULOSA. The mRNA is cell-to-cell mobile.
AT5G49850(annose-binding_lectin_superfamily_protein)	0.435697	-1.1986	0.211331	-5.67169	1.41e-08	1.17e-07	185.07	126.74	134.859	59.5683	64.5309	65.345	protein_coding		Mannose-binding lectin superfamily protein;(source:Araport11)
AT4G14680(APS3)	1.72951	0.790362	0.139634	5.66024	1.51e-08	1.24e-07	1563.46	1763.47	1868.15	3584.61	2725.79	2703.58	protein_coding	(APS3)	ATP sulfurylase
AT4G24150(GRF8)	4.09807	2.03495	0.360708	5.64153	1.69e-08	1.38e-07	7.71126	11.8819	14.4491	49.0562	56.7872	44.321	protein_coding	GROWTH-REGULATING FACTOR 8 (GRF8)	Growth regulating factor encoding transcription activator. One of the nine members of a GRF gene family, containing nuclear targeting domain. Involved in leaf development and expressed in shoot and flower.
AT1G30210(TCP24)	0.749609	-0.415789	0.0739522	-5.62241	1.88e-08	1.53e-07	1896.97	1689.21	1768.82	1296.49	1369.78	1331.33	protein_coding	TEOSINTE BRANCHED 1, CYCLOIDEA, AND PCF FAMILY 24 (TCP24)	TCP family protein involved in heterochronic regulation of leaf differentiation.
AT1G31290(AGO3)	2.69045	1.42785	0.281137	5.07883	3.8e-07	2.49e-06	84.8239	160.405	145.695	469.538	337.282	267.062	protein_coding	ARGONAUTE 3 (AGO3)	ARGONAUTE 3;(source:Araport11)
AT2G42200(SPL9)	0.716527	-0.480908	0.0977423	-4.92016	8.65e-07	5.33e-06	736.425	687.168	711.62	452.018	531.735	529.579	protein_coding	SQUAMOSA PROMOTER BINDING PROTEIN-LIKE 9 (SPL9)	Encodes a putative transcriptional regulator that is involved in the vegetative to reproductive phase transition. Expression is regulated by MIR156b. SPL activity nonautonomously inhibits initiation of new leaves at the shoot apical meristem.
AT3G20710(F-box_protein)	10.7219	3.42249	0.716591	4.77607	1.79e-06	1.03e-05	3.85563	1.98031	1.20409	21.0241	22.3707	19.3194	protein_coding		F-box family protein;(source:Araport11)
AT3G12977(NAC)	0.349995	-1.51459	0.317308	-4.77326	1.81e-06	1.05e-05	88.6795	75.2519	54.1843	17.5201	25.8124	28.4109	protein_coding		NAC (No Apical Meristem) domain transcriptional regulator superfamily protein;(source:Araport11)
AT3G62980(TIR1	0.834113	-0.261686	0.0550511	-4.75351	2e-06	1.14e-05	5382.46	5527.05	5253.47	4330.97	4538.68	4591.77	protein_coding	TRANSPORT INHIBITOR RESPONSE 1 (TIR1)	Encodes an auxin receptor that mediates auxin-regulated transcription. It contains leucine-rich repeats and an F-box and interacts with ASK1, ASK2 and AtCUL1 to form SCF-TIR1, an SCF ubiquitin ligase complex. Related to yeast Grr1p and human SKP2 proteins, involved in ubiquitin-mediated processes. Required for normal response to auxin and repressed in response to flagellin. As part of the SCF com…
AT2G27400(TAS1A)	1.39512	0.480387	0.103715	4.63182	3.62e-06	1.97e-05	520.51	429.728	449.729	672.771	619.497	646.631	other_rna	TRANS-ACTING SIRNA1A (TAS1A)	Trans-acting siRNA1a primary transcript (TAS1a). Regulated by miR173.
AT1G64580(PPR)	0.685567	-0.544631	0.118681	-4.58904	4.45e-06	2.39e-05	404.841	359.427	338.953	238.273	258.124	248.879	protein_coding		Pentatricopeptide repeat (PPR) superfamily protein;(source:Araport11)
AT3G60630(HAM2)	0.708284	-0.497599	0.108784	-4.57417	4.78e-06	2.55e-05	1958.66	1827.83	1809.75	1128.29	1395.59	1418.27	protein_coding	HAIRY MERISTEM 2 (HAM2)	Belongs to one of the LOM (LOST MERISTEMS) genes: AT2G45160 (LOM1), AT3G60630 (LOM2) and AT4G00150 (LOM3). LOM1 and LOM2 promote cell differentiation at the periphery of shoot meristems and help to maintain their polar organization.
AT3G54990(SMZ)	1.66363	0.734338	0.160675	4.57033	4.87e-06	2.59e-05	223.627	197.041	205.298	273.313	371.698	379.569	protein_coding	SCHLAFMUTZE (SMZ)	Encodes a AP2 domain transcription factor that can repress flowering. SMZ and its paralogous gene, SNARCHZAPFEN (SNZ), share a signature with partial complementarity to the miR172 microRNA, whose precursor is induced upon flowering.
AT5G37020(ARF8)	1.34553	0.428179	0.102333	4.18418	2.86e-05	0.000130586	2024.21	1685.25	1719.45	2239.07	2539.94	2493.34	protein_coding	AUXIN RESPONSE FACTOR 8 (ARF8)	Encodes a member of the auxin response factor family. Mediates auxin response via expression of auxin regulated genes. Acts redundantly with ARF6 to control stamen elongation and flower maturation. Expression of ARF8 is controlled by miR167.
AT5G05400(LRR_and_NB-ARC)	1.67381	0.743132	0.181753	4.0887	4.34e-05	0.000190655	92.5351	81.1928	103.552	134.905	169.501	158.533	protein_coding		LRR and NB-ARC domains-containing disease resistance protein;(source:Araport11)
AT2G18780(F-box_protein)	1.60658	0.68399	0.170413	4.01373	5.98e-05	0.000254995	84.8239	85.1534	81.8784	150.673	125.62	131.826	protein_coding		F-box and associated interaction domains-containing protein;(source:Araport11)
AT5G53660(GRF7)	0.374428	-1.41724	0.356507	-3.97535	7.03e-05	0.000295251	63.6179	47.5275	64.4191	10.5121	22.3707	28.4109	protein_coding	GROWTH-REGULATING FACTOR 7 (GRF7)	Growth regulating factor encoding transcription activator. One of the nine members of a GRF gene family, containing nuclear targeting domain. Involved in leaf development and expressed in shoot and flower.
AT1G27370(SPL10)	1.30907	0.388542	0.0982268	3.95557	7.64e-05	0.000318466	744.137	626.769	617.099	868.996	858.692	852.326	protein_coding	SQUAMOSA PROMOTER BINDING PROTEIN-LIKE 10 (SPL10)	In conjunction with SPL11 and SPL2, SPL10 redundantly controls proper development of lateral organs in association with shoot maturation in the reproductive phase. SPL10 also controls lamina shape during vegetative development.
AT1G53290(Galactosyltransferase_family_protein)	0.788363	-0.343068	0.0868349	-3.9508	7.79e-05	0.00032434	755.704	741.627	768.815	544.875	611.753	617.652	protein_coding		Galactosyltransferase family protein;(source:Araport11)
AT1G63080(TAS_locus)	0.709823	-0.494468	0.129046	-3.83173	0.000127245	0.000502561	231.338	243.578	232.39	150.673	170.362	175.011	protein_coding		Transacting siRNA generating locus. Is targeted by TAS2-derived ta-siR2140 for cleavage.
AT1G63230(TPR)	0.593709	-0.752172	0.200548	-3.75057	0.00017643	0.000673349	119.525	99.0156	93.9194	66.5763	58.508	59.0946	protein_coding		Tetratricopeptide repeat (TPR)-like superfamily protein;(source:Araport11)
AT3G57920(SPL15)	1.50192	0.586808	0.160009	3.66733	0.000245094	0.00090183	92.5351	88.1239	92.1133	140.161	138.526	132.395	protein_coding	SQUAMOSA PROMOTER BINDING PROTEIN-LIKE 15 (SPL15)	Encodes a putative transcriptional regulator that is involved in the vegetative to reproductive phase transition. Expression is regulated by MIR156b.
AT5G63020(CC-NBS-LRR_class)	1.33046	0.411922	0.113253	3.63719	0.000275631	0.00100136	1694.55	2026.85	1897.05	2811.97	2384.2	2306.39	protein_coding		Disease resistance protein (CC-NBS-LRR class) family;(source:Araport11)
AT3G45090(P-loop_containing_nucleoside_triphosphate_hydrolases_superfamily_protein)	1.17846	0.236908	0.0669193	3.5402	0.000399824	0.0013996	890.651	872.328	881.999	1023.17	1042.82	1044.38	protein_coding		P-loop containing nucleoside triphosphate hydrolases superfamily protein;(source:Araport11)
AT2G39250(SNZ)	0.68557	-0.544623	0.1566	-3.47779	0.000505566	0.00172283	1125.84	859.456	874.173	557.139	641.868	744.365	protein_coding	SCHNARCHZAPFEN (SNZ)	Encodes a AP2 domain transcription factor that can repress flowering. SNZ and its paralogous gene, SCHLAFMUTZE (SMZ), share a signature with partial complementarity to the miR172 microRNA, whose precursor is induced upon flowering.
AT1G53160(SPL4)	0.740268	-0.43388	0.12677	-3.42259	0.000620287	0.00207222	231.338	263.382	255.268	189.217	175.524	194.33	protein_coding	SQUAMOSA PROMOTER BINDING PROTEIN-LIKE 4 (SPL4)	Encodes a member of the SPL (squamosa-promoter binding protein-like)gene family, a novel gene family encoding DNA binding proteins and putative transcription factors. Contains the SBP-box, which encodes the SBP-domain, required and sufficient for interaction with DNA. It is involved in regulation of flowering and vegetative phase change. Its temporal expression is regulated by the microRNA miR156…
AT1G15890(CC-NBS-LRR_class)	1.46277	0.548701	0.164901	3.32745	0.000876456	0.00281411	173.503	255.46	242.023	366.17	327.817	308.542	protein_coding		Disease resistance protein (CC-NBS-LRR class) family;(source:Araport11)
AT3G23690(CIL2)	0.859205	-0.218926	0.0658487	-3.32468	0.000885191	0.00283863	1677.2	1683.27	1677.3	1527.75	1414.52	1403.5	protein_coding	CIB1 LIKE PROTEIN 2 (CIL2)	basic helix-loop-helix (bHLH) DNA-binding superfamily protein;(source:Araport11)
AT5G12840(NF-YA1)	0.845828	-0.241563	0.0729503	-3.31134	0.000928513	0.00296468	921.496	954.511	919.928	805.924	800.184	765.957	protein_coding	NUCLEAR FACTOR Y, SUBUNIT A1 (NF-YA1)	Encodes a subunit of CCAAT-binding complex, binds to CCAAT box motif present in some plant promoter sequences. One of three members of this class (HAP2A, HAP2B, HAP2C), it is expressed in vegetative and reproductive tissues.
AT3G52910(GRF4)	0.780833	-0.356915	0.107949	-3.30632	0.000945295	0.00300934	570.633	524.783	556.292	381.938	428.485	464.234	protein_coding	GROWTH-REGULATING FACTOR 4 (GRF4)	Growth regulating factor encoding transcription activator. One of the nine members of a GRF gene family, containing nuclear targeting domain. Involved in leaf development and expressed in root, shoot and flower.
AT5G49615(TAS3b)	2.43607	1.28456	0.388582	3.30575	0.000947212	0.00301469	15.4225	9.90156	12.0409	35.0402	27.5332	27.2744	other_rna	TRANS-ACTING SIRNA3B (TAS3b)	trans-acting siRNA (tasi-RNA)
AT5G06100(MYB33)	0.843089	-0.246244	0.0759279	-3.24312	0.00118227	0.00367099	763.415	804.007	812.764	662.259	671.122	678.452	protein_coding	MYB DOMAIN PROTEIN 33 (MYB33)	Encodes a member of the myb family of transcription factors (MYB33), contains Pfam profile: PF00249 myb DNA-binding domain. Double mutants with MYB65 are male sterile- anthers are small, pollen development is defective. Spatial expression appears to be under the control of miR159, contains a target site for this micro RNA. When the target site is mutated , expression is detected in leaves, roots,…
AT5G49870(annose-binding_lectin_superfamily_protein)	0.311529	-1.68256	0.536949	-3.13356	0.00172697	0.00513401	19.2782	13.8622	18.0614	7.00803	5.16247	4.54574	protein_coding		Mannose-binding lectin superfamily protein;(source:Araport11)
AT2G22840(GRF1)	0.82136	-0.283913	0.0914405	-3.1049	0.00190347	0.00558415	855.95	986.196	990.368	748.108	807.927	779.026	protein_coding	GROWTH-REGULATING FACTOR 1 (GRF1)	Growth regulating factor encoding transcription activator. One of the nine members of a GRF gene family, containing nuclear targeting domain. Mutants result in smaller leaves indicating the role of the gene in leaf development. Expressed in root, shoot and flower
AT2G02850(ARPN)	0.548687	-0.865945	0.281258	-3.07882	0.00207819	0.00604254	53.9788	45.5472	46.9597	21.0241	27.5332	28.4109	protein_coding	PLANTACYANIN (ARPN)	Encodes plantacyanin one of blue copper proteins. Involved in anther development and pollination. Expressed in the transmitting tract of the pistil.
AT3G11440(MYB65)	1.43864	0.524706	0.170571	3.07618	0.00209671	0.00608748	96.3908	106.937	120.409	140.161	156.595	171.602	protein_coding	MYB DOMAIN PROTEIN 65 (MYB65)	Member of the R2R3-MYB gene family. Similar to GA-induced Barley myb gene. May be induced during germination in response to GA. Double mutants with MYB33 are male sterile, showing defects in pollen development and anther development. Contains a binding site for miRNA159 and may be spatially regulated by this micro RNA. The male sterile phenotype of the MYB33/MYB65 double mutant is light and tempe…
AT1G62860(PPR)	0.77101	-0.375178	0.12297	-3.05097	0.00228103	0.00655048	250.616	243.578	261.289	182.209	206.499	192.058	pseudogene		pseudogene of pentatricopeptide (PPR) repeat-containing protein
AT1G62590(PPR)	0.746395	-0.421989	0.138727	-3.04187	0.00235116	0.00672948	366.285	346.555	336.544	210.241	280.494	277.858	protein_coding	PENTATRICOPEPTIDE (PPR) ADENYLATE CYCLASE (PPR-AC)	Encodes a functional adenylate cyclase.
AT4G03190(GRH1)	0.740869	-0.43271	0.14616	-2.96052	0.00307125	0.00849674	1480.56	2099.13	1910.9	1497.97	1313.85	1272.24	protein_coding	GRR1-LIKE PROTEIN 1 (GRH1)	Encodes an F box protein belonging to the TIR1 subfamily. This protein forms SCF complexes with ASK1 and CUL1 and interacts with Aux/IAA proteins in an auxin-dependent manner. It also has sequence similarity to the yeast protein GRR1, which is involved in glucose repression.
AT1G12290(CC-NBS-LRR_class)	1.29549	0.373497	0.12674	2.94694	0.0032093	0.00883056	188.926	234.667	232.39	276.817	293.401	290.359	protein_coding		Disease resistance protein (CC-NBS-LRR class) family;(source:Araport11)
AT1G77850(ARF17)	0.841697	-0.248628	0.0847441	-2.93386	0.00334771	0.00914795	520.51	526.763	526.189	441.506	440.531	443.21	protein_coding	AUXIN RESPONSE FACTOR 17 (ARF17)	Posttranscriptionally regulated by miR160 and is essential for proper development.Regulates early auxin response genes.
AT5G43740(CC-NBS-LRR_class)	1.2587	0.331935	0.114855	2.89004	0.00385196	0.0102833	1172.11	992.137	1069.84	1180.85	1408.5	1456.91	protein_coding		Disease resistance protein (CC-NBS-LRR class) family;(source:Araport11)
AT5G57735(TASIR-ARF)	2.99788	1.58394	0.550949	2.87494	0.00404108	0.0107184	11.5669	5.94094	4.81638	17.5201	15.4874	26.138	other_rna	(TASIR-ARF)	One of 3 loci encoding tasiR-ARF. A small interfering RNA that regulates the accumulation of ARF2,3 and 4.
AT3G20910(NF-YA9)	1.2044	0.268316	0.0937107	2.86324	0.00419331	0.0110722	408.697	421.807	423.841	471.29	508.504	525.033	protein_coding	NUCLEAR FACTOR Y, SUBUNIT A9 (NF-YA9)	nuclear factor Y, subunit A9;(source:Araport11)
AT1G27360(SPL11)	1.48909	0.574432	0.202621	2.83501	0.00458236	0.011994	763.415	532.704	521.373	693.795	998.078	992.108	protein_coding	SQUAMOSA PROMOTER-LIKE 11 (SPL11)	In conjunction with SPL10 and SPL2, SPL11 redundantly controls proper development of lateral organs in association with shoot maturation in the reproductive phase.
AT4G34060(DML3)	1.29251	0.370175	0.132019	2.80394	0.00504818	0.0130402	177.359	217.834	192.053	238.273	266.728	255.698	protein_coding	DEMETER-LIKE PROTEIN 3 (DML3)	Encodes a protein with 5-meC and thymine-DNA glycosylase activity with a preference for CpG and CpHpG sequences. Involved in maintaining methylation marks.
AT1G01040(DCL1)	1.13705	0.18529	0.0664855	2.78692	0.00532118	0.0136349	2267.11	2132.8	2347.98	2547.42	2617.37	2512.66	protein_coding	DICER-LIKE 1 (DCL1)	Encodes a Dicer homolog. Dicer is a RNA helicase involved in microRNA processing. Mutations in this locus can result in embryo lethality. Embryo shape at seed maturity is globular-elongate. Other mutants convert the floral meristems to an indeterminate state, others yet show defects in ovule development. mRNA is expressed in all shoot tissues. DCL1 is able to produce miRNAs and siRNAs. The mRNA i…
AT2G39681(TAS2)	1.20914	0.273977	0.0988633	2.77127	0.00558378	0.0142204	663.168	541.615	593.619	730.588	708.119	722.204	other_rna	TRANS-ACTING SIRNA2 (TAS2)	Trans-acting siRNA primary transcript. RDR6-dependent trans-acting siRNA-generating locus. Regulated by miR173. Produces at least four distinct ta-siRNAs directed against PPR genes.
AT3G22700(F-box_protein)	0.13789	-2.85841	1.13689	-2.51424	0.0119291	0.0274667	11.5669	5.94094	3.61228	1.75201	0.860412	0.568217	protein_coding		F-box and associated interaction domains-containing protein;(source:Araport11)
AT1G56010(NAC1)	0.815889	-0.293555	0.117476	-2.49885	0.0124598	0.0285133	337.368	329.722	293.197	254.041	269.309	252.857	protein_coding	NAC DOMAIN CONTAINING PROTEIN 1 (NAC1)	Encodes a transcription factor involved in shoot apical meristem formation and auxin-mediated lateral root formation. The gene is thought not to be involved in stress responses (NaCl, auxins, ethylene). NAC1 (NAC1)
AT5G61430(NAC100)	0.608581	-0.716478	0.287099	-2.49558	0.0125751	0.0287309	73.257	81.1928	80.6744	28.0321	48.1831	61.3675	protein_coding	NAC DOMAIN CONTAINING PROTEIN 100 (NAC100)	NAC domain containing protein 100;(source:Araport11)
AT2G35160(SUVH5)	1.25012	0.322063	0.131272	2.4534	0.0141512	0.0317401	161.936	166.346	151.716	196.225	199.616	200.013	protein_coding	SU(VAR)3-9 HOMOLOG 5 (SUVH5)	Encodes SU(var)3-9 homologue 5 (SUVH5). SUVH5 has histone methyltransferase (MTase) activity in vitro and contributes to the maintenance of H3 mK9 (methylation of histone H3 at Lys-9) and CMT3-mediated non-CG methylation in vivo. This is a member of a subfamily of SET proteins that shares a conserved SRA domain.
AT1G12210(RFL1)	0.801459	-0.319299	0.130357	-2.44942	0.0143085	0.0320401	347.007	331.702	394.341	259.297	286.517	310.815	protein_coding	RPS5-LIKE 1 (RFL1)	RFL1 has high sequence similarity to the adjacent disease resistance (R) gene RPS5.
AT3G26810(AFB2)	0.904236	-0.145229	0.0597072	-2.43235	0.0150014	0.0333487	2031.92	1984.27	1974.11	1874.65	1760.4	1787.61	protein_coding	AUXIN SIGNALING F-BOX 2 (AFB2)	auxin signaling F-box 2;(source:Araport11)
AT4G14140(DMT2)	1.33735	0.419382	0.173125	2.42242	0.0154175	0.0341708	133.019	110.898	138.471	197.977	166.06	155.123	protein_coding	DNA METHYLTRANSFERASE 2 (DMT2)	This gene is predicted to encode a DNA methyltransferase. A plant line expressing an RNAi construct directed against DMT2 has reduced agrobacterium-mediated tumor formation.
AT3G15170(CUC1)	1.75396	0.810616	0.355296	2.28152	0.0225177	0.0473908	23.1338	17.8228	19.2655	45.5522	34.4165	27.2744	protein_coding	CUP-SHAPED COTYLEDON1 (CUC1)	Encodes a transcription factor involved in shoot apical meristem formation and auxin-mediated lateral root formation. The gene is thought not to be involved in stress responses (NaCl, auxins, ethylene). <i>Cuc</i> mutant was first recognized at the heart stage, where embryos lacking two distinct bulges of cotyledonary primordia were observed.
AT1G12280(SUMM2)	1.19832	0.261009	0.114852	2.27257	0.0230522	0.0483385	613.045	511.911	499.097	593.931	652.193	673.906	protein_coding	SUPPRESSOR OF MKK1 MKK2 2 (SUMM2)	Encodes a NB-LRR protein SUMM2 involved in defense response to bacterium.
AT5G39710(EMB2745)	1.22912	0.297627	0.131925	2.25604	0.0240682	0.0501515	501.232	400.023	439.495	473.042	583.36	571.059	protein_coding	EMBRYO DEFECTIVE 2745 (EMB2745)	Tetratricopeptide repeat (TPR)-like superfamily protein;(source:Araport11)
AT1G63330(PPR)	0.708416	-0.497332	0.22059	-2.25455	0.0241613	0.0503171	65.5457	65.3503	71.6436	49.0562	44.7414	50.5714	protein_coding		Pentatricopeptide repeat (PPR) superfamily protein;(source:Araport11)
AT5G38550(annose-binding_lectin_superfamily_protein)	0.611442	-0.709712	0.315303	-2.25089	0.0243924	0.0507207	84.8239	61.3897	43.3474	42.0482	36.1373	35.2295	protein_coding		Mannose-binding lectin superfamily protein;(source:Araport11)
AT1G50055(TAS1B)	0.798184	-0.325206	0.145329	-2.23772	0.0252396	0.0520559	352.79	272.293	275.136	229.513	225.428	251.152	other_rna	TRANS-ACTING SIRNA1B (TAS1B)	Trans-acting siRNA1b primary transcript (TAS1b). Regulated by miR173.
AT1G63130(RPF6)	1.22795	0.296255	0.138707	2.13583	0.0326936	0.0648599	586.056	726.775	665.864	949.589	774.371	727.318	protein_coding	RNA PROCESSING FACTOR 6 (RPF6)	Transacting siRNA generating locus. Its derived siR9as targets AT1G62930 for cleavage. Itself is targeted by TAS2-derived ta-siR2140 for cleavage.
AT1G63150(TAS_locus)	0.793179	-0.334281	0.163405	-2.04572	0.0407835	0.0782126	150.37	140.602	144.491	98.1125	129.062	112.507	protein_coding		Transacting siRNA generating locus.
AT2G45160(HAM1)	0.869945	-0.201004	0.0988779	-2.03285	0.0420679	0.0802867	1459.36	1783.27	1729.68	1513.74	1405.91	1427.36	protein_coding	HAIRY MERISTEM 1 (HAM1)	Belongs to one of the LOM (LOST MERISTEMS) genes: AT2G45160 (LOM1), AT3G60630 (LOM2) and AT4G00150 (LOM3). LOM1 and LOM2 promote cell differentiation at the periphery of shoot meristems and help to maintain their polar organization.
AT3G16710(PPR4)	1.2397	0.309996	0.156446	1.9815	0.0475357	0.0889881	102.174	131.691	122.216	147.169	148.851	151.714	protein_coding	PENTATRICOPEPTIDE REPEAT 4 (PPR4)	Pentatricopeptide repeat (PPR) superfamily protein;(source:Araport11)
AT5G67180(TOE3)	1.16185	0.216425	0.109471	1.97701	0.0480402	0.0897959	422.192	371.309	396.147	413.474	466.344	484.689	protein_coding	TARGET OF EARLY ACTIVATION TAGGED (EAT) 3 (TOE3)	target of early activation tagged (EAT) 3;(source:Araport11)
AT2G36400(GRF3)	0.758476	-0.398825	0.203972	-1.95529	0.0505487	0.0936047	800.043	1404.04	1331.13	923.309	845.785	921.649	protein_coding	GROWTH-REGULATING FACTOR 3 (GRF3)	Growth regulating factor encoding transcription activator. One of the nine members of a GRF gene family, containing nuclear targeting domain. Mutants result in smaller leaves indicating the role of the gene in leaf development. Expressed in root, shoot and flower.
AT1G02860(NLA)	1.31711	0.397371	0.213433	1.86181	0.0626306	0.110383	354.718	576.271	567.731	795.412	630.682	567.081	protein_coding	NITROGEN LIMITATION ADAPTATION (NLA)	Encodes a ubiquitin E3 ligase with RING and SPX domains that is involved in mediating immune responses and mediates degradation of PHT1s at plasma membranes. Targeted by MIR827. Ubiquitinates PHT1;3, PHT1;2, PHT1;1/AtPT1 and PHT1;4/AtPT2.
AT4G36920(AP2)	0.87517	-0.192365	0.104551	-1.83991	0.0657815	0.114871	582.2	629.739	686.334	602.691	545.501	534.124	protein_coding	APETALA 2 (AP2)	Encodes a floral homeotic gene, a member of the AP2/EREBP (ethylene responsive element binding protein) class of transcription factors and is involved in the specification of floral organ identity, establishment of floral meristem identity, suppression of floral meristem indeterminancy, and development of the ovule and seed coat. AP2 also has a role in controlling seed mass. Dominant negative all…
AT5G06510(NF-YA10)	1.49831	0.583337	0.32816	1.7776	0.0754695	0.128692	38.5563	30.6948	37.929	31.5362	58.508	64.7768	protein_coding	NUCLEAR FACTOR Y, SUBUNIT A10 (NF-YA10)	nuclear factor Y, subunit A10;(source:Araport11)
AT1G27340(LCR)	1.09915	0.136389	0.078157	1.74507	0.0809731	0.135352	1619.36	1453.55	1436.49	1576.81	1670.92	1678.51	protein_coding	LEAF CURLING RESPONSIVENESS (LCR)	Encodes a putative F-box protein that is involved in the regulation of leaf morphology.
AT5G41610(CHX18)	0.868985	-0.202596	0.11678	-1.73485	0.0827667	0.13769	296.884	324.771	285.37	276.817	262.426	252.857	protein_coding	CATION/H+ EXCHANGER 18 (CHX18)	member of Putative Na+/H+ antiporter family
AT2G33770(PHO2)	1.07668	0.106593	0.0693899	1.53615	0.124502	0.193339	5796.94	5355.76	5775.44	6426.37	5951.47	5861.16	protein_coding	PHOSPHATE 2 (PHO2)	Encodes a ubiquitin-conjugating E2 enzyme. UBC24 mRNA accumulation is suppressed by miR399f, miR399b and miR399c. Involved in phosphate starvation response and mediates degradation of PHO1 and PHT1s at endomembrane. Its expression is responsive to phosphate (Pi) and not phosphite (Phi) in roots and shoots. The mRNA is cell-to-cell mobile.
AT1G62670(RPF2)	0.878579	-0.186756	0.124677	-1.49792	0.134153	0.205925	235.193	253.48	222.758	199.729	212.522	208.536	protein_coding	RNA PROCESSING FACTOR 2 (RPF2)	Encodes a pentatricopeptide repeat protein required for 5' end processing of nad9 and cox3 mRNAs in mitochondria.
AT4G00150(HAM3)	1.11593	0.158251	0.105699	1.49719	0.134345	0.206127	1062.23	1119.87	961.47	1044.2	1221.79	1222.8	protein_coding	HAIRY MERISTEM 3 (HAM3)	Belongs to one of the LOM (LOST MERISTEMS) genes: AT2G45160 (LOM1), AT3G60630 (LOM2) and AT4G00150 (LOM3). LOM1 and LOM2 promote cell differentiation at the periphery of shoot meristems and help to maintain their polar organization.
AT1G06580(PPR1)	1.17133	0.228153	0.154949	1.47243	0.140903	0.2143	111.813	124.76	110.777	136.657	139.387	131.826	protein_coding	PENTATRICOPEPTIDE REPEAT 1 (PPR1)	Pentatricopeptide repeat (PPR) superfamily protein;(source:Araport11)
AT5G43730(RSG2)	0.881538	-0.181905	0.127292	-1.42903	0.152995	0.229568	439.542	367.348	341.963	318.866	341.584	336.385	protein_coding	RESISTANCE SILENCED GENE 2 (RSG2)	Disease resistance protein (CC-NBS-LRR class) family;(source:Araport11)
AT1G62910(RFL9)	0.784834	-0.34954	0.245354	-1.42464	0.154262	0.231161	57.8345	65.3503	73.4498	38.5442	57.6476	56.2535	protein_coding	RF-LIKE 9 (RFL9)	Pentatricopeptide repeat (PPR) superfamily protein;(source:Araport11)
AT1G62720(NG1)	1.39571	0.481003	0.339349	1.41743	0.156358	0.233664	34.7007	25.7441	20.4696	28.0321	36.1373	40.9117	protein_coding	NOVEL GENE 1 (NG1)	Encodes a PPR protein gene that localizes to the mitochondrion and is required for seed germination.
AT1G54160(NF-YA5)	0.846548	-0.240336	0.173267	-1.38708	0.165416	0.245074	246.76	230.706	236.003	148.921	224.568	218.764	protein_coding	NUCLEAR FACTOR Y, SUBUNIT A5 (NF-YA5)	Encodes a member of the CCAAT-binding transcription factor (CBF-B/NF-YA) family. Expression is upregulated in response to ABA and drought. This regulation appears to be mediated by MIR169A which is downregulated in response to drought. NFYA5 is a target of MIR169A. Loss of function mutations are hypersensitive to drought.
AT4G19440(TPR)	1.09964	0.137028	0.102224	1.34047	0.180092	0.263314	341.223	353.486	370.259	404.714	405.254	373.319	protein_coding		Tetratricopeptide repeat (TPR)-like superfamily protein;(source:Araport11)
AT1G66690(S-adenosyl-L-methionine-dependent_methyltransferases_superfamily_protein)	1.35793	0.441411	0.338971	1.30221	0.192844	0.278647	23.1338	17.8228	21.6737	24.5281	27.5332	30.6837	protein_coding		S-adenosyl-L-methionine-dependent methyltransferases superfamily protein;(source:Araport11)
AT1G12820(AFB3)	0.903152	-0.14696	0.117091	-1.25509	0.209448	0.29835	2290.24	1956.55	1971.1	1622.36	1945.39	2023.42	protein_coding	AUXIN SIGNALING F-BOX 3 (AFB3)	Auxin receptor involved in primary and lateral root growth inhibition in response to nitrate. Target of miR393. Induced by nitrate in primary roots.
AT2G29130(LAC2)	1.39218	0.47735	0.382794	1.24702	0.212392	0.301645	11.5669	25.7441	27.6942	35.0402	36.1373	26.138	protein_coding	LACCASE 2 (LAC2)	putative laccase, knockout mutant had reduced root elongation under PEG-induced dehydration
AT1G72830(NF-YA3)	1.11041	0.151088	0.125682	1.20215	0.229306	0.320713	296.884	295.067	328.718	297.841	354.49	364.796	protein_coding	NUCLEAR FACTOR Y, SUBUNIT A3 (NF-YA3)	Encodes a subunit of CCAAT-binding complex, binds to CCAAT box motif present in some plant promoter sequences. One of three members of this class (HAP2A, HAP2B, HAP2C), it is expressed in vegetative and reproductive tissues. Expression is upregulated in the shoot of cax1/cax3 mutant.
AT3G08500(MYB83)	1.24239	0.313123	0.26749	1.1706	0.241761	0.334672	50.1232	33.6653	45.7556	63.0723	51.6247	47.7303	protein_coding	MYB DOMAIN PROTEIN 83 (MYB83)	Encodes a putative R2R3-type MYB transcription factor (MYB83).
AT3G57230(AGL16)	1.05654	0.0793426	0.0678571	1.16926	0.242299	0.335344	1010.18	986.196	1009.03	1054.71	1085.84	1035.29	protein_coding	AGAMOUS-LIKE 16 (AGL16)	MADS-box transcription factor. Expressed in leaf, root and stem, with higher RNA accumulation in guard cells and trichomes. AGL16 can directly interact with SVP and indirectly interact with FLC. Furthermore, the accumulation of AGL16 transcripts is modulated by miR824 (AT4G24415). The flowering time effect for the miR824/AGL16 module is more obvious in the Col-FRI background than in the Col-0 bac…
AT5G07680(NAC080)	0.866318	-0.207031	0.177399	-1.16704	0.243196	0.336316	96.3908	116.838	115.593	94.6085	89.4829	103.416	protein_coding	NAC DOMAIN CONTAINING PROTEIN 80 (NAC080)	NAC domain containing protein 80;(source:Araport11)
AT5G46680(PPR)	1.13872	0.187418	0.164694	1.13797	0.255131	0.350021	107.958	93.0747	99.9399	112.129	113.574	113.643	protein_coding		Pentatricopeptide repeat (PPR-like) superfamily protein;(source:Araport11)
AT5G65560(PPR)	0.936159	-0.0951747	0.0849252	-1.12069	0.26242	0.358109	551.355	526.763	547.261	515.091	514.527	494.349	protein_coding		Pentatricopeptide repeat (PPR) superfamily protein;(source:Araport11)
AT2G22740(SUVH6)	0.939815	-0.089552	0.0810619	-1.10474	0.269274	0.365608	1174.04	1369.39	1276.94	1198.37	1203.72	1201.21	protein_coding	SU(VAR)3-9 HOMOLOG 6 (SUVH6)	Encodes a SU(VAR)3-9 homolog, a methyltransferase involved in histone methylation. The protein was shown to bind to methylated cytosines of CG, CNG and CNN motifs but has a preference for the latter two. This is a member of a subfamily of SET proteins that shares a conserved SRA domain.
AT4G32880(HB-8)	0.953885	-0.0681133	0.0664317	-1.02531	0.305215	0.403693	1866.13	1810.01	1713.43	1660.9	1727.71	1728.52	protein_coding	HOMEOBOX GENE 8 (HB-8)	member of homeodomain-leucine zipper family, acting as a differentiation-promoting transcription factor of the vascular meristems.
AT5G43270(SPL2)	1.13293	0.180056	0.182238	0.988024	0.323141	0.422706	963.908	1271.36	1210.12	1643.38	1183.93	1095.52	protein_coding	SQUAMOSA PROMOTER BINDING PROTEIN-LIKE 2 (SPL2)	member of the SPL (squamosa-promoter binding protein-like) gene family, a novel gene family encoding DNA binding proteins and putative transcription factors. In conjunction with SPL10 and SPL11, SPL2 redundantly controls proper development of lateral organs in association with shoot maturation in the reproductive phase.
AT2G38080(IRX12)	0.93693	-0.0939871	0.0959447	-0.979596	0.327285	0.426955	510.871	521.812	575.557	529.107	493.877	499.463	protein_coding	IRREGULAR XYLEM 12 (IRX12)	LAC4 appears to have laccase activity based on enzyme assays performed using lac4 mutants. These mutants also have reduced levels of lignin. LAC4 is expressed in vascular bundles and fibers and likely contributes to lignin biosynthesis, and hence cell wall biosynthesis, there. lac4/irx12 mutants have a mild irregular xylem phenotype.
AT5G60760(P-loop_containing_nucleoside_triphosphate_hydrolases_superfamily_protein)	0.862623	-0.213198	0.21773	-0.979182	0.32749	0.427163	69.4014	67.3306	63.817	66.5763	56.7872	52.276	protein_coding		P-loop containing nucleoside triphosphate hydrolases superfamily protein;(source:Araport11)
AT2G45480(GRF9)	0.905357	-0.143442	0.149258	-0.961033	0.336535	0.436361	158.081	136.642	143.287	136.657	132.504	126.144	protein_coding	GROWTH-REGULATING FACTOR 9 (GRF9)	Growth regulating factor encoding transcription activator. One of the nine members of a GRF gene family, containing nuclear targeting domain. Involved in leaf development.
AT1G60130(Mannose-binding_lectin_superfamily_protein)	0.619094	-0.691771	0.719962	-0.960843	0.336631	0.436441	11.5669	5.94094	5.41843	3.50402	3.44165	5.68217	protein_coding		Mannose-binding lectin superfamily protein;(source:Araport11)
AT1G62930(RPF3)	0.91796	-0.123497	0.131426	-0.939668	0.347388	0.44787	196.637	203.972	207.104	166.441	197.034	190.353	protein_coding	RNA PROCESSING FACTOR 3 (RPF3)	RPF3 encodes a pentatricopeptide repeat (PPR) protein involved in 5' processing of different mitochondrial mRNAs.
AT1G12220(RPS5)	0.924258	-0.113632	0.125705	-0.90396	0.366016	0.466877	530.149	710.932	676.099	604.443	583.36	598.901	protein_coding	RESISTANT TO P. SYRINGAE 5 (RPS5)	Resistance gene, mediates resistance against the bacterial pathogen Pseudomonas syringae. Contains a putative nucleotide binding site composed of kinase-1a (or P-loop), kinase-2a, and putative kinase-3a domains, 13 imperfect leucine-rich repeats, a potential leucine zipper, and two uncharacterized motifs that are well conserved in products of previously isolated R genes. Confers resistance to Pse…
AT2G28550(RAP2.7)	0.927855	-0.108029	0.120421	-0.897095	0.369668	0.470328	3254.15	3144.74	3259.48	2473.84	3185.25	3284.87	protein_coding	RELATED TO AP2.7 (RAP2.7)	related to AP2.7;(source:Araport11)
AT5G51270(U-box_protein)	0.774816	-0.368075	0.423928	-0.868248	0.385259	0.486165	15.4225	19.8031	24.0819	10.5121	15.4874	19.3194	protein_coding		U-box domain-containing protein kinase family protein;(source:Araport11)
AT5G16640(PPR)	0.883819	-0.178177	0.209082	-0.852188	0.39411	0.495182	94.463	94.0648	94.5214	63.0723	83.46	96.597	protein_coding		Pentatricopeptide repeat (PPR) superfamily protein;(source:Araport11)
AT1G69170(SPL6)	0.932922	-0.100172	0.120526	-0.831124	0.405903	0.506796	266.039	227.736	240.819	224.257	225.428	228.423	protein_coding	SQUAMOSA PROMOTER BINDING PROTEIN (SBP)-DOMAIN TRANSCRIPTION FACTOR 6 (SPL6)	Encodes SPL6. Required for the resistance mediated by the TIR-NB-LRR RPS4 against Pseudomonas syringae carrying the avrRps4 effector. Transcriptome analysis indicates that SPL6 positively regulates a subset of defense genes.
AT2G47460(MYB12)	0.80311	-0.31633	0.382013	-0.828062	0.407635	0.508565	142.658	93.0747	97.5317	38.5442	106.691	114.78	protein_coding	MYB DOMAIN PROTEIN 12 (MYB12)	MYB12 belongs to subgroup 7 of the R2R3-MYB family. It strongly activates the promoters of chalcone synthase (CHS), flavanone 3-hydroxylase (F3H), flavonol synthase (FLS) and - to a lesser extent - chalcone flavanone isomerase (CHI), but cannot activate the promoters of flavonoid-3'hydroxylase (F3'H) and dihydroflavonol 4-reductase (DF). The activation requires a functional MYB recognition elemen…
AT2G39675(TAS1C)	1.05874	0.0823446	0.107129	0.768647	0.442103	0.541653	385.563	376.259	432.27	446.762	409.556	421.049	other_rna	TRANS-ACTING SIRNA1C (TAS1C)	Trans-acting siRNA1c primary transcript (TAS1c). Gb: AY922999
AT1G66700(PXMT1)	0.813624	-0.297567	0.388203	-0.766523	0.443365	0.542787	23.1338	17.8228	19.2655	17.5201	13.7666	17.0465	protein_coding	(PXMT1)	A member of the Arabidopsis SABATH methyltransferase gene family. Encodes PXMT1, a methyltransferase that methylates 1,7-paraxanthine.
AT4G30080(ARF16)	0.945097	-0.081465	0.109188	-0.746098	0.455608	0.553969	1060.3	1013.92	980.133	823.444	1018.73	1022.79	protein_coding	AUXIN RESPONSE FACTOR 16 (ARF16)	Involved in root cap cell differentiation. Gene expression is regulated by mir160.Located in the nucleus.
AT5G53950(CUC2)	1.18677	0.247045	0.417656	0.591505	0.554182	0.64507	11.5669	17.8228	15.6532	24.5281	15.4874	17.0465	protein_coding	CUP-SHAPED COTYLEDON 2 (CUC2)	Transcriptional activator of the NAC gene family, with CUC1 redundantly required for embryonic apical meristem formation, cotyledon separation and expression of STM. Proper timing of CUC2 expression is required to maintain the phyllotactic pattern initiated in the meristem. CUC2 expression in leaf sinus region is required for serration and the extent of serration is modulated by mir164A mediated …
AT1G63400(PPR)	0.909961	-0.136124	0.230204	-0.591317	0.554308	0.645161	129.164	143.573	107.766	80.5924	126.481	130.122	protein_coding		Pentatricopeptide repeat (PPR) superfamily protein;(source:Araport11)
AT2G31070(TCP10)	0.964539	-0.052089	0.0883986	-0.589252	0.555692	0.646306	1341.76	1524.84	1531.61	1510.23	1406.77	1352.93	protein_coding	TCP DOMAIN PROTEIN 10 (tcp10)	TCP family protein involved in heterchronic regulation of leaf differentiation.
AT3G17280(F-box_protein)	1.09737	0.134045	0.243427	0.550656	0.58187	0.670175	46.2676	45.5472	45.7556	59.5683	48.1831	46.5938	protein_coding		F-box and associated interaction domains-containing protein;(source:Araport11)
AT4G37740(GRF2)	1.03469	0.0491971	0.0921212	0.534048	0.593308	0.679904	443.398	443.59	449.127	492.314	444.833	455.142	protein_coding	GROWTH-REGULATING FACTOR 2 (GRF2)	Growth regulating factor encoding transcription activator. One of the nine members of a GRF gene family, containing nuclear targeting domain. Mutants result in smaller leaves indicating the role of the gene in leaf development. Expressed in root, shoot and flower
AT3G49510(F-box_ptotein)	1.10107	0.138911	0.300202	0.462727	0.64356	0.724243	30.845	46.5373	45.1536	59.5683	46.4623	36.9341	protein_coding		F-box family protein;(source:Araport11)
AT1G52100(Mannose-binding_lectin_superfamily_protein)	1.0337	0.0478194	0.111485	0.428932	0.667972	0.744549	898.362	738.657	718.243	798.916	838.042	779.594	protein_coding	Mannose-binding lectin superfamily protein	Mannose-binding lectin superfamily protein;(source:Araport11)
AT1G66370(MYB113)	1.27552	0.351082	0.856014	0.410136	0.681706	0.756722	3.85563	1.98031	6.02047	3.50402	3.44165	7.95504	protein_coding	MYB DOMAIN PROTEIN 113 (MYB113)	Encodes a member of the MYB family of transcription factors. Involved in regulation of anthocyanin biosynthesis. Affects the expression of enzymes involved in later steps of anthocyanin biosynthesis.
AT4G26800(PPR)	1.03692	0.0523076	0.226862	0.230571	0.817648	0.866769	100.246	83.1731	63.817	77.0884	86.0412	84.0962	protein_coding		Pentatricopeptide repeat (PPR) superfamily protein;(source:Araport11)
AT2G28350(ARF10)	1.02089	0.0298268	0.129671	0.230019	0.818077	0.866959	643.89	780.243	709.212	844.468	678.005	675.042	protein_coding	AUXIN RESPONSE FACTOR 10 (ARF10)	Involved in root cap cell differentiation.
AT1G52130(Mannose-binding_lectin_superfamily_protein)	0.925054	-0.11239	0.573395	-0.196007	0.844604	0.887585	7.71126	7.92125	8.42866	7.00803	8.60412	6.81861	protein_coding	Mannose-binding lectin superfamily protein	Mannose-binding lectin superfamily protein;(source:Araport11)
AT5G41170(PPR)	1.02185	0.0311807	0.174364	0.178825	0.858075	0.897652	123.38	99.0156	98.7358	112.129	103.249	107.393	protein_coding		Pentatricopeptide repeat (PPR-like) superfamily protein;(source:Araport11)
AT3G22470(PPR3)	1.01462	0.0209392	0.160135	0.130759	0.895966	0.925522	127.236	134.661	148.706	126.145	137.666	152.282	protein_coding	PENTATRICOPEPTIDE REPEAT 3 (PPR3)	Pentatricopeptide repeat (PPR) superfamily protein;(source:Araport11)
AT1G17590(NF-YA8)	1.00964	0.0138344	0.158311	0.0873879	0.930363	0.950789	267.966	214.864	218.543	273.313	225.428	210.24	protein_coding	NUCLEAR FACTOR Y, SUBUNIT A8 (NF-YA8)	nuclear factor Y, subunit A8;(source:Araport11)
AT1G22960(PPR)	1.00573	0.00824473	0.0985792	0.0836356	0.933346	0.952964	435.686	421.807	473.209	430.994	459.46	450.028	protein_coding		Pentatricopeptide repeat (PPR) superfamily protein;(source:Araport11)
AT1G31280(AGO2)	0.996974	-0.00437293	0.102803	-0.0425372	0.96607	0.975527	1164.4	944.609	1077.66	1117.78	1022.17	1034.16	protein_coding	ARGONAUTE 2 (AGO2)	Encodes Argonaute gene that binds viral siRNAs and is involved in antiviral defense response. Regulates innate immunity.Mutants have increased susceptibility to Potato virus X and tobacco rattle virus.
AT1G30330(ARF6)	1.00135	0.00195182	0.0547888	0.0356245	0.971582	0.979621	4457.11	4503.23	4712.83	4436.09	4644.51	4613.93	protein_coding	AUXIN RESPONSE FACTOR 6 (ARF6)	Encodes a member of the auxin response factor family. Mediates auxin response via expression of auxin regulated genes. Acts redundantly with ARF8 to control stamen elongation and flower maturation. Expression of ARF6 is controlled by miR167.
AT1G52120(Mannose-binding_lectin_superfamily_protein)	1.00635	0.00913329	0.274947	0.0332184	0.9735	0.980675	34.7007	33.6653	36.1228	38.5442	33.5561	34.6613	protein_coding	Mannose-binding lectin superfamily protein	Mannose-binding lectin superfamily protein;(source:Araport11)
