# Supplementary material for: RBV, an evolutionarily conserved WD40 repeat protein, promotes microRNA biogenesis and loading into ARGONAUTE1 in Arabidopsis
Source: Research Square preprint supplement (doi:10.21203/rs.3.rs-536724/v1), 2021-06-02
Supplement: Supplementary file 6 [file a5c378972720c4579f901de6.xlsx]

## Sheet: Supplementary Data 6
Supplementary Data 6.The 363 hypo-DEGs in rbv-1 vs. Col.
test_id	gene_id	locus	Col	rbv-1	status	Col_value	rbv-1_value	log2(fold_change)	test_stat	p_value	q_value	significant
AT1G01240	AT1G01240	Chr1:99864-101987	q1	q2	OK	21.6891	8.81004	-1.29975	-3.64379	5e-05	0.00101408	yes
AT1G02205	AT1G02205	Chr1:418415-422579	q1	q2	OK	60.7864	23.4485	-1.37425	-4.07873	5e-05	0.00101408	yes
AT1G02220	AT1G02220	Chr1:428649-430720	q1	q2	OK	3.08351	1.13261	-1.44492	-2.58441	0.00025	0.00405464	yes
AT1G02450	AT1G02450	Chr1:497916-498539	q1	q2	OK	5.49948	1.91606	-1.52115	-2.02025	0.0033	0.0313396	yes
AT1G02800	AT1G02800	Chr1:613196-616231	q1	q2	OK	2.7519	0.863606	-1.67198	-2.89231	5e-05	0.00101408	yes
AT1G02850	AT1G02850	Chr1:630373-633420	q1	q2	OK	22.3427	8.28574	-1.4311	-4.11617	5e-05	0.00101408	yes
AT1G03400	AT1G03400	Chr1:842658-844251	q1	q2	OK	19.6251	9.72005	-1.01367	-2.84288	5e-05	0.00101408	yes
AT1G04425	AT1G04425	Chr1:1194186-1196889	q1	q2	OK	14.2786	5.32907	-1.4219	-2.13075	0.001	0.0123687	yes
AT1G05680	AT1G05680	Chr1:1703001-1704838	q1	q2	OK	77.7592	22.0222	-1.82006	-5.17164	5e-05	0.00101408	yes
AT1G06620	AT1G06620	Chr1:2025543-2027413	q1	q2	OK	7.66868	2.17156	-1.82025	-3.91203	5e-05	0.00101408	yes
AT1G06980	AT1G06980	Chr1:2142938-2143977	q1	q2	OK	3.71711	1.44678	-1.36133	-2.17978	0.0007	0.00939986	yes
AT1G07400	AT1G07400	Chr1:2274925-2275783	q1	q2	OK	14.9867	4.62893	-1.69494	-3.52184	5e-05	0.00101408	yes
AT1G07430	AT1G07430	Chr1:2280745-2282828	q1	q2	OK	4.00396	1.72627	-1.21377	-2.47363	0.0001	0.00186768	yes
AT1G09240	AT1G09240	Chr1:2984828-2986231	q1	q2	OK	3.15484	1.35291	-1.22151	-2.0741	0.00075	0.00992838	yes
AT1G09350	AT1G09350	Chr1:3019638-3021443	q1	q2	OK	2.85757	0.736839	-1.95536	-2.68313	5e-05	0.00101408	yes
AT1G09500	AT1G09500	Chr1:3066673-3069234	q1	q2	OK	33.3983	14.8211	-1.17213	-3.22094	5e-05	0.00101408	yes
AT1G10682	AT1G10682	Chr1:3544912-3545614	q1	q2	OK	84.5595	35.1503	-1.26643	-3.71745	5e-05	0.00101408	yes
AT1G13990	AT1G13990	Chr1:4794663-4796599	q1	q2	OK	53.9077	24.607	-1.13143	-3.37228	5e-05	0.00101408	yes
AT1G14120	AT1G14120	Chr1:4833395-4835089	q1	q2	OK	3.75207	1.52839	-1.29567	-2.24587	0.00025	0.00405464	yes
AT1G14240	AT1G14240	Chr1:4864880-4868011	q1	q2	OK	1.60507	0.796643	-1.01063	-1.60079	0.00445	0.0393431	yes
AT1G14250	AT1G14250	Chr1:4868345-4871488	q1	q2	OK	32.8598	9.38589	-1.80776	-5.33123	5e-05	0.00101408	yes
AT1G14580	AT1G14580	Chr1:4989561-4992805	q1	q2	OK	19.2702	9.37194	-1.03995	-3.02951	5e-05	0.00101408	yes
AT1G15380	AT1G15380	Chr1:5290581-5292582	q1	q2	OK	6.1998	1.75237	-1.82291	-2.90008	5e-05	0.00101408	yes
AT1G15520	AT1G15520	Chr1:5331857-5338326	q1	q2	OK	2.63631	1.13388	-1.21725	-2.83448	5e-05	0.00101408	yes
AT1G15830	AT1G15830	Chr1:5448059-5450617	q1	q2	OK	4.4947	0.924574	-2.28136	-3.79759	5e-05	0.00101408	yes
AT1G16515	AT1G16515	Chr1:5647461-5648114	q1	q2	OK	6.65079	1.92783	-1.78655	-1.96541	0.00085	0.0108987	yes
AT1G17170	AT1G17170	Chr1:5869542-5870883	q1	q2	OK	77.2095	18.8237	-2.03623	-5.78666	5e-05	0.00101408	yes
AT1G18265	AT1G18265	Chr1:6282232-6283348	q1	q2	OK	13.4913	6.27316	-1.10477	-2.67965	5e-05	0.00101408	yes
AT1G19530	AT1G19530	Chr1:6763764-6765049	q1	q2	OK	13.2642	4.82978	-1.4575	-3.01052	5e-05	0.00101408	yes
AT1G19670	AT1G19670	Chr1:6803485-6805092	q1	q2	OK	150.942	65.2859	-1.20915	-3.43605	5e-05	0.00101408	yes
AT1G19960	AT1G19960	Chr1:6927735-6928656	q1	q2	OK	82.0004	27.9035	-1.55519	-4.38001	5e-05	0.00101408	yes
AT1G21140	AT1G21140	Chr1:7404327-7405426	q1	q2	OK	2.06564	0.519577	-1.99118	-2.27173	0.00215	0.0226223	yes
AT1G21250	AT1G21250	Chr1:7439170-7442113	q1	q2	OK	25.2676	10.9623	-1.20473	-3.55838	5e-05	0.00101408	yes
AT1G22380	AT1G22380	Chr1:7900354-7902427	q1	q2	OK	2.13723	0.355605	-2.58739	-3.38012	0.0001	0.00186768	yes
AT1G22400	AT1G22400	Chr1:7903659-7906969	q1	q2	OK	23.7073	11.2228	-1.07891	-2.99887	5e-05	0.00101408	yes
AT1G22530	AT1G22530	Chr1:7955444-7958564	q1	q2	OK	83.8702	40.2978	-1.05746	-2.69011	5e-05	0.00101408	yes
AT1G22990	AT1G22990	Chr1:8139113-8140233	q1	q2	OK	3.46605	1.25555	-1.46498	-1.86663	0.00295	0.0288982	yes
AT1G23720	AT1G23720	Chr1:8388296-8392154	q1	q2	OK	7.65112	3.63015	-1.07564	-2.98034	5e-05	0.00101408	yes
AT1G24070	AT1G24070	Chr1:8516165-8519984	q1	q2	OK	4.18118	1.8194	-1.20045	-2.64548	5e-05	0.00101408	yes
AT1G28480	AT1G28480	Chr1:10013433-10014256	q1	q2	OK	5.76839	1.81344	-1.66944	-2.64729	0.0002	0.00335767	yes
AT1G29195	AT1G29195	Chr1:10202413-10203491	q1	q2	OK	2.44003	0.995389	-1.29357	-1.86754	0.003	0.0291982	yes
AT1G29270	AT1G29270	Chr1:10229807-10231384	q1	q2	OK	2.7363	1.01676	-1.42824	-1.7044	0.004	0.0364842	yes
AT1G29395	AT1G29395	Chr1:10288128-10289666	q1	q2	OK	165.15	36.8604	-2.16363	-6.4453	5e-05	0.00101408	yes
AT1G29460	AT1G29460	Chr1:10307351-10308246	q1	q2	OK	11.8103	4.77683	-1.30592	-2.41819	0.00015	0.00266679	yes
AT1G29560	AT1G29560	Chr1:10332370-10335714	q1	q2	OK	1.96939	0.974191	-1.01547	-1.89257	0.00205	0.0218162	yes
AT1G29910	AT1G29910	Chr1:10472279-10473502	q1	q2	OK	4340.87	1187.96	-1.86949	-5.00014	5e-05	0.00101408	yes
AT1G29920	AT1G29920	Chr1:10474655-10475969	q1	q2	OK	2422.2	593.852	-2.02814	-5.29134	5e-05	0.00101408	yes
AT1G30280	AT1G30280	Chr1:10662607-10664763	q1	q2	OK	12.8189	5.91104	-1.11679	-2.82988	5e-05	0.00101408	yes
AT1G30750	AT1G30750	Chr1:10904774-10905724	q1	q2	OK	4.51229	1.59594	-1.49946	-2.36472	0.00045	0.00655982	yes
AT1G31173	AT1G31173	Chr1:11137538-11137915	q1	q2	OK	9.39273	2.06069	-2.18842	-1.5401	0.005	0.0428334	yes
AT1G31690	AT1G31690	Chr1:11343853-11347945	q1	q2	OK	28.4736	13.5482	-1.07152	-3.12884	5e-05	0.00101408	yes
AT1G31835	AT1G31835	Chr1:11422635-11423684	q1	q2	OK	6.74828	2.58019	-1.38704	-2.56356	5e-05	0.00101408	yes
AT1G32350	AT1G32350	Chr1:11666885-11668690	q1	q2	OK	4.86131	0.818648	-2.57003	-4.093	5e-05	0.00101408	yes
AT1G32960	AT1G32960	Chr1:11945249-11951982	q1	q2	OK	0.959676	0.203248	-2.23931	-2.8896	5e-05	0.00101408	yes
AT1G34760	AT1G34760	Chr1:12743721-12745748	q1	q2	OK	8.62987	3.73575	-1.20794	-2.63525	5e-05	0.00101408	yes
AT1G43160	AT1G43160	Chr1:16263804-16264968	q1	q2	OK	2.29068	0.917147	-1.32055	-1.78175	0.0045	0.0396599	yes
AT1G44350	AT1G44350	Chr1:16834209-16838562	q1	q2	OK	29.3847	7.27537	-2.01397	-5.59426	5e-05	0.00101408	yes
AT1G48330	AT1G48330	Chr1:17863659-17864558	q1	q2	OK	36.348	16.2111	-1.1649	-3.05018	5e-05	0.00101408	yes
AT1G51470	AT1G51470	Chr1:19087383-19090523	q1	q2	OK	1.73367	0.423477	-2.03347	-2.86906	0.00015	0.00266679	yes
AT1G51760	AT1G51760	Chr1:19199350-19201707	q1	q2	OK	57.4876	21.8763	-1.39388	-3.97649	5e-05	0.00101408	yes
AT1G52000	AT1G52000	Chr1:19333087-19336135	q1	q2	OK	74.3317	32.9082	-1.17553	-3.3308	5e-05	0.00101408	yes
AT1G52040	AT1G52040	Chr1:19350313-19352791	q1	q2	OK	42.0051	14.777	-1.50721	-4.24841	5e-05	0.00101408	yes
AT1G52060	AT1G52060	Chr1:19358799-19360822	q1	q2	OK	3.71559	1.23951	-1.58382	-2.71831	5e-05	0.00101408	yes
AT1G52070	AT1G52070	Chr1:19364808-19366925	q1	q2	OK	6.00693	2.46012	-1.2879	-2.6098	5e-05	0.00101408	yes
AT1G52400	AT1G52400	Chr1:19514988-19518411	q1	q2	OK	247.191	94.9018	-1.38112	-3.81648	5e-05	0.00101408	yes
AT1G53540	AT1G53540	Chr1:19980298-19981199	q1	q2	OK	3.55058	0.148112	-4.5833	-2.8456	0.00265	0.0265977	yes
AT1G54100	AT1G54100	Chr1:20194456-20199193	q1	q2	OK	77.8286	34.4145	-1.17728	-3.56251	5e-05	0.00101408	yes
AT1G56550	AT1G56550	Chr1:21185591-21188369	q1	q2	OK	2.40009	1.1711	-1.03522	-1.84899	0.00245	0.0250393	yes
AT1G56600	AT1G56600	Chr1:21207536-21209635	q1	q2	OK	8.45849	3.90181	-1.11626	-2.53947	5e-05	0.00101408	yes
AT1G58070	AT1G58070	Chr1:21502904-21504078	q1	q2	OK	8.13563	3.71685	-1.13018	-2.44326	0.0001	0.00186768	yes
AT1G61170	AT1G61170	Chr1:22549522-22550711	q1	q2	OK	15.4245	7.61245	-1.01879	-2.60517	5e-05	0.00101408	yes
AT1G61590	AT1G61590	Chr1:22723367-22726190	q1	q2	OK	1.80357	0.752248	-1.26157	-2.01042	0.00145	0.0166228	yes
AT1G62770	AT1G62770	Chr1:23245834-23246949	q1	q2	OK	7.60257	3.67972	-1.04689	-2.10768	0.0004	0.00598686	yes
AT1G64590	AT1G64590	Chr1:23993476-23995509	q1	q2	OK	2.06242	0.765785	-1.42932	-2.14182	0.00095	0.0118929	yes
AT1G64940	AT1G64940	Chr1:24123788-24125801	q1	q2	OK	1.83342	0.292641	-2.64733	-3.32211	5e-05	0.00101408	yes
AT1G65790	AT1G65790	Chr1:24468769-24472475	q1	q2	OK	1.55921	0.445902	-1.80602	-2.83289	5e-05	0.00101408	yes
AT1G66100	AT1G66100	Chr1:24604957-24606722	q1	q2	OK	88.0485	16.4044	-2.42421	-6.86384	5e-05	0.00101408	yes
AT1G66270	AT1G66270	Chr1:24699867-24703166	q1	q2	OK	13.0337	4.38545	-1.57145	-4.16544	5e-05	0.00101408	yes
AT1G66280	AT1G66280	Chr1:24706344-24709996	q1	q2	OK	5.83123	2.01047	-1.53627	-3.46462	5e-05	0.00101408	yes
AT1G66570	AT1G66570	Chr1:24834868-24838286	q1	q2	OK	8.16536	0.704814	-3.5342	-5.9561	5e-05	0.00101408	yes
AT1G67365	AT1G67365	Chr1:25238394-25243837	q1	q2	OK	3.65368	1.11978	-1.70614	-1.90358	0.00575	0.0473336	yes
AT1G67810	AT1G67810	Chr1:25426233-25427461	q1	q2	OK	12.0895	2.40955	-2.32692	-4.85583	5e-05	0.00101408	yes
AT1G68540	AT1G68540	Chr1:25719957-25721826	q1	q2	OK	8.53425	3.95025	-1.11132	-2.55703	5e-05	0.00101408	yes
AT1G69140	AT1G69140	Chr1:25991239-25992018	q1	q2	OK	109.143	53.2781	-1.0346	-2.94472	5e-05	0.00101408	yes
AT1G70850	AT1G70850	Chr1:26714865-26716901	q1	q2	OK	54.0073	20.5915	-1.39111	-4.12482	5e-05	0.00101408	yes
AT1G71000	AT1G71000	Chr1:26768791-26770177	q1	q2	OK	7.12738	0.923019	-2.94894	-4.23875	5e-05	0.00101408	yes
AT1G71520	AT1G71520	Chr1:26938368-26939267	q1	q2	OK	3.49644	0.694266	-2.33233	-2.86835	0.0005	0.00718182	yes
AT1G72120	AT1G72120	Chr1:27132013-27134101	q1	q2	OK	3.13386	1.19989	-1.38504	-2.64557	5e-05	0.00101408	yes
AT1G73480	AT1G73480	Chr1:27628677-27632840	q1	q2	OK	16.0865	5.55609	-1.53371	-4.25884	5e-05	0.00101408	yes
AT1G73870	AT1G73870	Chr1:27778983-27780809	q1	q2	OK	2.21949	0.854615	-1.37688	-2.28072	0.00045	0.00655982	yes
AT1G74150	AT1G74150	Chr1:27880379-27883857	q1	q2	OK	1.1327	0.5524	-1.03598	-1.35508	0.0053	0.0445464	yes
AT1G75960	AT1G75960	Chr1:28517938-28519938	q1	q2	OK	17.7761	8.23008	-1.11096	-3.1678	5e-05	0.00101408	yes
AT1G76090	AT1G76090	Chr1:28550201-28552561	q1	q2	OK	46.7167	22.1549	-1.07631	-3.01478	5e-05	0.00101408	yes
AT1G76100	AT1G76100	Chr1:28553882-28554930	q1	q2	OK	405.093	191.424	-1.08148	-3.25722	5e-05	0.00101408	yes
AT1G76240	AT1G76240	Chr1:28602704-28603932	q1	q2	OK	2.02448	0.638575	-1.66462	-2.14605	0.00175	0.0193161	yes
AT1G76790	AT1G76790	Chr1:28814433-28823727	q1	q2	OK	51.1942	22.2573	-1.2017	-3.37025	5e-05	0.00101408	yes
AT1G78170	AT1G78170	Chr1:29413873-29415197	q1	q2	OK	25.363	10.8386	-1.22655	-3.29357	5e-05	0.00101408	yes
AT1G79450	AT1G79450	Chr1:29887615-29890211	q1	q2	OK	1.19876	0.445252	-1.42885	-1.76693	0.00405	0.036769	yes
AT1G79460	AT1G79460	Chr1:29890366-29897166	q1	q2	OK	6.9956	2.83641	-1.30238	-2.47609	0.0004	0.00598686	yes
AT1G79680	AT1G79680	Chr1:29979972-29982819	q1	q2	OK	1.18011	0.338306	-1.80252	-2.69696	0.0001	0.00186768	yes
AT1G80240	AT1G80240	Chr1:30171356-30173109	q1	q2	OK	3.3604	1.09133	-1.62255	-2.88816	5e-05	0.00101408	yes
AT2G01520	AT2G01520	Chr2:235924-237253	q1	q2	OK	30.4947	9.27279	-1.71748	-4.34589	5e-05	0.00101408	yes
AT2G01530	AT2G01530	Chr2:239668-240846	q1	q2	OK	19.5797	4.82574	-2.02054	-4.53483	5e-05	0.00101408	yes
AT2G02080	AT2G02080	Chr2:518078-521737	q1	q2	OK	17.508	8.6797	-1.0123	-2.95149	5e-05	0.00101408	yes
AT2G03875	AT2G03875	Chr2:7668-9399	q1	q2	OK	1.90962	0.708798	-1.42984	-2.26154	0.0004	0.00598686	yes
AT2G04070	AT2G04070	Chr2:1353754-1355883	q1	q2	OK	2.72606	1.12231	-1.28034	-2.18039	0.0006	0.00830169	yes
AT2G04240	AT2G04240	Chr2:1461547-1462944	q1	q2	OK	36.4543	15.8783	-1.19904	-3.3585	5e-05	0.00101408	yes
AT2G05070	AT2G05070	Chr2:1799233-1800472	q1	q2	OK	874.335	253.2	-1.78791	-4.83781	5e-05	0.00101408	yes
AT2G05100	AT2G05100	Chr2:1822989-1824480	q1	q2	OK	826.11	282.96	-1.54574	-4.07943	5e-05	0.00101408	yes
AT2G05540	AT2G05540	Chr2:2033153-2035218	q1	q2	OK	248.137	96.3042	-1.36547	-4.02571	5e-05	0.00101408	yes
AT2G06255	AT2G06255	Chr2:2457572-2460915	q1	q2	OK	3.63936	1.33876	-1.44279	-1.98215	0.00295	0.0288982	yes
AT2G14560	AT2G14560	Chr2:6213616-6216279	q1	q2	OK	37.1759	15.2321	-1.28726	-3.28795	5e-05	0.00101408	yes
AT2G14878	AT2G14878	Chr2:6392166-6393042	q1	q2	OK	38.2487	14.4931	-1.40005	-3.79876	5e-05	0.00101408	yes
AT2G15480	AT2G15480	Chr2:6758429-6763501	q1	q2	OK	18.1684	6.72276	-1.4343	-3.29351	5e-05	0.00101408	yes
AT2G15490	AT2G15490	Chr2:6758429-6763501	q1	q2	OK	16.022	3.43671	-2.22095	-3.60735	5e-05	0.00101408	yes
AT2G15880	AT2G15880	Chr2:6917513-6920319	q1	q2	OK	25.7474	12.6272	-1.02789	-2.95413	5e-05	0.00101408	yes
AT2G15960	AT2G15960	Chr2:6947095-6947866	q1	q2	OK	422.14	180.949	-1.22214	-3.36769	5e-05	0.00101408	yes
AT2G16660	AT2G16660	Chr2:7218653-7221890	q1	q2	OK	63.2664	27.419	-1.20626	-3.54975	5e-05	0.00101408	yes
AT2G18050	AT2G18050	Chr2:7845922-7847031	q1	q2	OK	23.2025	6.62507	-1.80827	-3.91421	5e-05	0.00101408	yes
AT2G18370	AT2G18370	Chr2:7980531-7981868	q1	q2	OK	15.2988	7.62908	-1.00383	-2.35995	0.0002	0.00335767	yes
AT2G20750	AT2G20750	Chr2:8940832-8942706	q1	q2	OK	4.58735	1.99354	-1.20233	-2.38807	5e-05	0.00101408	yes
AT2G20880	AT2G20880	Chr2:8985958-8987302	q1	q2	OK	2.13697	0.626065	-1.77118	-2.42742	0.0005	0.00718182	yes
AT2G21045	AT2G21045	Chr2:9027729-9029058	q1	q2	OK	9.62144	3.61763	-1.41121	-2.79139	5e-05	0.00101408	yes
AT2G22821	AT2G22821	Chr2:9721074-9721960	q1	q2	OK	2.83723	0.392687	-2.85303	-2.42696	0.0046	0.0402875	yes
AT2G24850	AT2G24850	Chr2:10582073-10585216	q1	q2	OK	2.03744	0.76757	-1.40839	-2.47574	5e-05	0.00101408	yes
AT2G25810	AT2G25810	Chr2:11012498-11014171	q1	q2	OK	6.3383	2.45503	-1.36836	-2.69852	0.0001	0.00186768	yes
AT2G25900	AT2G25900	Chr2:11040545-11043256	q1	q2	OK	88.3223	38.8071	-1.18646	-3.21247	5e-05	0.00101408	yes
AT2G25980	AT2G25980	Chr2:11076577-11079968	q1	q2	OK	3.99482	1.61015	-1.31093	-2.60033	5e-05	0.00101408	yes
AT2G26150	AT2G26150	Chr2:11135623-11137792	q1	q2	OK	4.12351	1.29411	-1.67191	-2.68959	5e-05	0.00101408	yes
AT2G27385	AT2G27385	Chr2:11716000-11717437	q1	q2	OK	583.079	275.966	-1.0792	-3.20354	5e-05	0.00101408	yes
AT2G28160	AT2G28160	Chr2:12003595-12006276	q1	q2	OK	2.78926	0.865029	-1.68906	-2.47352	0.0001	0.00186768	yes
AT2G28670	AT2G28670	Chr2:12300202-12302358	q1	q2	OK	6.63139	3.20866	-1.04734	-1.73608	0.00365	0.0340204	yes
AT2G29350	AT2G29350	Chr2:12600913-12602556	q1	q2	OK	8.34964	2.26459	-1.88246	-3.73364	5e-05	0.00101408	yes
AT2G29420	AT2G29420	Chr2:12616377-12618899	q1	q2	OK	102.351	46.2251	-1.14678	-3.31129	5e-05	0.00101408	yes
AT2G29460	AT2G29460	Chr2:12626477-12627891	q1	q2	OK	16.2337	2.95406	-2.45822	-5.32054	5e-05	0.00101408	yes
AT2G29480	AT2G29480	Chr2:12630197-12631321	q1	q2	OK	4.62149	0.955404	-2.27417	-3.13968	0.0001	0.00186768	yes
AT2G29490	AT2G29490	Chr2:12631340-12632538	q1	q2	OK	32.8678	10.0151	-1.7145	-4.52211	5e-05	0.00101408	yes
AT2G29500	AT2G29500	Chr2:12633064-12634120	q1	q2	OK	9.02867	3.61904	-1.31891	-2.73753	5e-05	0.00101408	yes
AT2G31040	AT2G31040	Chr2:13208623-13211354	q1	q2	OK	169.406	72.3579	-1.22726	-3.71549	5e-05	0.00101408	yes
AT2G32300	AT2G32300	Chr2:13722361-13723641	q1	q2	OK	3.60256	1.75397	-1.0384	-1.70917	0.00375	0.0346557	yes
AT2G33050	AT2G33050	Chr2:14021652-14025239	q1	q2	OK	5.27176	2.50335	-1.07443	-1.8568	0.0029	0.0285799	yes
AT2G33790	AT2G33790	Chr2:14293560-14295353	q1	q2	OK	5.68933	0.24681	-4.52678	-4.83227	0.00135	0.0157342	yes
AT2G33810	AT2G33810	Chr2:14305000-14306072	q1	q2	OK	17.7125	7.2093	-1.29683	-3.10171	5e-05	0.00101408	yes
AT2G33830	AT2G33830	Chr2:14308753-14310608	q1	q2	OK	1510.23	557.87	-1.43677	-3.91662	5e-05	0.00101408	yes
AT2G34420	AT2G34420	Chr2:14518343-14523568	q1	q2	OK	7676.21	3555.72	-1.11025	-2.83766	5e-05	0.00101408	yes
AT2G34430	AT2G34430	Chr2:14524606-14525918	q1	q2	OK	1541.5	95.2528	-4.01643	-11.0286	5e-05	0.00101408	yes
AT2G34500	AT2G34500	Chr2:14539372-14541617	q1	q2	OK	3.3942	0.89082	-1.92987	-3.70321	5e-05	0.00101408	yes
AT2G36050	AT2G36050	Chr2:15135567-15137012	q1	q2	OK	11.7059	4.96557	-1.2372	-2.92036	5e-05	0.00101408	yes
AT2G36100	AT2G36100	Chr2:15158560-15160799	q1	q2	OK	10.3592	4.17584	-1.31077	-2.16849	0.0016	0.0180467	yes
AT2G36390	AT2G36390	Chr2:15264210-15273115	q1	q2	OK	110.599	42.4987	-1.37985	-3.83348	5e-05	0.00101408	yes
AT2G36750	AT2G36750	Chr2:15410375-15412064	q1	q2	OK	22.1218	6.82924	-1.69567	-4.50549	5e-05	0.00101408	yes
AT2G36770	AT2G36770	Chr2:15415076-15416845	q1	q2	OK	4.41781	2.13748	-1.04742	-2.22209	0.00045	0.00655982	yes
AT2G36780	AT2G36780	Chr2:15417363-15419391	q1	q2	OK	10.1456	1.48536	-2.77197	-5.89179	5e-05	0.00101408	yes
AT2G37750	AT2G37750	Chr2:15830869-15831592	q1	q2	OK	11.1623	4.48077	-1.31681	-2.47896	0.00025	0.00405464	yes
AT2G37770	AT2G37770	Chr2:15834765-15837001	q1	q2	OK	17.4264	5.79527	-1.58833	-3.90756	5e-05	0.00101408	yes
AT2G37900	AT2G37900	Chr2:15864185-15866769	q1	q2	OK	1.25442	0.56772	-1.14378	-1.81912	0.00185	0.0201698	yes
AT2G38390	AT2G38390	Chr2:16079678-16081671	q1	q2	OK	14.0553	6.82678	-1.04183	-2.72451	5e-05	0.00101408	yes
AT2G38400	AT2G38400	Chr2:16083644-16086453	q1	q2	OK	26.5625	8.92376	-1.57366	-4.41268	5e-05	0.00101408	yes
AT2G38465	AT2G38465	Chr2:16106209-16106935	q1	q2	OK	42.4862	19.872	-1.09625	-2.68105	5e-05	0.00101408	yes
AT2G40435	AT2G40435	Chr2:16886766-16889580	q1	q2	OK	11.3409	5.28503	-1.10156	-2.44878	0.0001	0.00186768	yes
AT2G42530	AT2G42530	Chr2:17704740-17710433	q1	q2	OK	490.742	186.91	-1.39262	-3.53368	5e-05	0.00101408	yes
AT2G42540	AT2G42540	Chr2:17710440-17712330	q1	q2	OK	996.369	385.591	-1.36961	-3.28472	5e-05	0.00101408	yes
AT2G42870	AT2G42870	Chr2:17836415-17837618	q1	q2	OK	40.9912	13.7063	-1.58047	-3.90821	5e-05	0.00101408	yes
AT2G43010	AT2G43010	Chr2:17886100-17889087	q1	q2	OK	56.2736	25.3904	-1.14818	-3.35106	5e-05	0.00101408	yes
AT2G43610	AT2G43610	Chr2:18087811-18089371	q1	q2	OK	9.8298	4.62389	-1.08806	-2.54078	5e-05	0.00101408	yes
AT2G43820	AT2G43820	Chr2:18152077-18156510	q1	q2	OK	105.168	29.5751	-1.83024	-5.3299	5e-05	0.00101408	yes
AT2G44010	AT2G44010	Chr2:18216573-18217453	q1	q2	OK	3.53581	1.53362	-1.2051	-1.81646	0.00335	0.0316916	yes
AT2G44740	AT2G44740	Chr2:18441827-18443405	q1	q2	OK	11.1716	2.47014	-2.17717	-4.47536	5e-05	0.00101408	yes
AT2G44940	AT2G44940	Chr2:18537176-18538556	q1	q2	OK	9.73849	4.67852	-1.05765	-2.42611	0.0001	0.00186768	yes
AT2G45050	AT2G45050	Chr2:18582696-18584127	q1	q2	OK	6.17642	2.32619	-1.4088	-2.81458	5e-05	0.00101408	yes
AT2G46192	AT2G46192	Chr2:18973208-18974133	q1	q2	OK	5.21461	1.90955	-1.44933	-2.28975	0.0006	0.00830169	yes
AT2G46440	AT2G46440	Chr2:19061687-19064937	q1	q2	OK	6.08615	1.69061	-1.84798	-4.18515	5e-05	0.00101408	yes
AT2G47130	AT2G47130	Chr2:19349347-19350650	q1	q2	OK	7.04675	2.51668	-1.48544	-3.00513	5e-05	0.00101408	yes
AT2G47540	AT2G47540	Chr2:19505826-19506681	q1	q2	OK	3.30944	1.25184	-1.40253	-1.84579	0.0049	0.0421611	yes
AT2G47880	AT2G47880	Chr2:19605029-19605704	q1	q2	OK	33.5439	10.881	-1.62423	-3.81709	5e-05	0.00101408	yes
AT3G01190	AT3G01190	Chr3:67031-68665	q1	q2	OK	10.9336	3.4691	-1.65613	-3.79274	5e-05	0.00101408	yes
AT3G01260	AT3G01260	Chr3:79296-82182	q1	q2	OK	2.59388	0.641933	-2.01462	-3.12026	5e-05	0.00101408	yes
AT3G01345	AT3G01345	Chr3:129137-130749	q1	q2	OK	2.70202	0.295446	-3.19307	-3.49682	0.0001	0.00186768	yes
AT3G03840	AT3G03840	Chr3:981071-981801	q1	q2	OK	5.72439	2.61437	-1.13066	-1.79788	0.0032	0.0306874	yes
AT3G04000	AT3G04000	Chr3:1035237-1039603	q1	q2	OK	11.1444	3.72888	-1.57951	-2.52144	0.00015	0.00266679	yes
AT3G04010	AT3G04010	Chr3:1035237-1039603	q1	q2	OK	7.01431	1.71607	-2.03119	-3.44254	5e-05	0.00101408	yes
AT3G05660	AT3G05660	Chr3:1648842-1652149	q1	q2	OK	1.69794	0.681476	-1.31705	-2.52137	5e-05	0.00101408	yes
AT3G05980	AT3G05980	Chr3:1795144-1796493	q1	q2	OK	5.94591	1.79039	-1.73163	-3.38848	5e-05	0.00101408	yes
AT3G08940	AT3G08940	Chr3:2717556-2722624	q1	q2	OK	1114.17	396.317	-1.49125	-3.91798	5e-05	0.00101408	yes
AT3G09925	AT3G09925	Chr3:3051608-3052850	q1	q2	OK	3.11088	1.09322	-1.50873	-1.99881	0.00325	0.0309849	yes
AT3G11340	AT3G11340	Chr3:3556553-3558361	q1	q2	OK	3.52154	1.38019	-1.35134	-2.57183	0.0001	0.00186768	yes
AT3G11550	AT3G11550	Chr3:3638177-3639348	q1	q2	OK	2.94349	0.940845	-1.6455	-2.28321	0.00105	0.0128653	yes
AT3G12580	AT3G12580	Chr3:3991116-3993886	q1	q2	OK	28.535	11.1758	-1.35236	-3.88509	5e-05	0.00101408	yes
AT3G13980	AT3G13980	Chr3:4618938-4620305	q1	q2	OK	12.3379	5.73087	-1.10627	-2.75622	5e-05	0.00101408	yes
AT3G15030	AT3G15030	Chr3:5061680-5064152	q1	q2	OK	47.123	23.4023	-1.00978	-3.06036	5e-05	0.00101408	yes
AT3G16800	AT3G16800	Chr3:5720940-5723185	q1	q2	OK	12.0441	4.97359	-1.27597	-3.19919	5e-05	0.00101408	yes
AT3G22231	AT3G22231	Chr3:7845822-7846833	q1	q2	OK	185.216	34.0336	-2.44417	-6.69663	5e-05	0.00101408	yes
AT3G22235	AT3G22235	Chr3:7854418-7855814	q1	q2	OK	1023.6	208.207	-2.29756	-6.51849	5e-05	0.00101408	yes
AT3G23190	AT3G23190	Chr3:8279270-8280912	q1	q2	OK	3.16974	1.34442	-1.23738	-1.93148	0.00215	0.0226223	yes
AT3G25190	AT3G25190	Chr3:9174397-9175866	q1	q2	OK	16.4621	7.27681	-1.17777	-2.88404	5e-05	0.00101408	yes
AT3G26200	AT3G26200	Chr3:9589248-9591179	q1	q2	OK	2.95998	1.34667	-1.1362	-2.12037	0.00015	0.00266679	yes
AT3G26290	AT3G26290	Chr3:9632607-9634822	q1	q2	OK	23.8454	10.3196	-1.20833	-3.43082	5e-05	0.00101408	yes
AT3G27150	AT3G27150	Chr3:10009441-10011807	q1	q2	OK	1.56369	0.659169	-1.24623	-1.90175	0.00265	0.0265977	yes
AT3G27690	AT3G27690	Chr3:10255905-10261975	q1	q2	OK	184.103	49.6932	-1.88939	-3.90989	5e-05	0.00101408	yes
AT3G27770	AT3G27770	Chr3:10284554-10287931	q1	q2	OK	87.932	38.0765	-1.20749	-3.16858	5e-05	0.00101408	yes
AT3G28007	AT3G28007	Chr3:10408072-10409977	q1	q2	OK	9.40685	3.62217	-1.37686	-3.0858	5e-05	0.00101408	yes
AT3G28220	AT3G28220	Chr3:10524180-10526733	q1	q2	OK	78.5639	25.6168	-1.61678	-4.79992	5e-05	0.00101408	yes
AT3G29370	AT3G29370	Chr3:11278374-11279214	q1	q2	OK	9.34602	2.97756	-1.65022	-2.74373	0.00015	0.00266679	yes
AT3G43850	AT3G43850	Chr3:15702084-15704391	q1	q2	OK	2.59287	0.599655	-2.11235	-2.09799	0.00085	0.0108987	yes
AT3G44300	AT3G44300	Chr3:15981927-15985535	q1	q2	OK	21.7035	8.91521	-1.28359	-3.64655	5e-05	0.00101408	yes
AT3G44860	AT3G44860	Chr3:16379570-16381434	q1	q2	OK	21.4212	4.77893	-2.16428	-5.44722	5e-05	0.00101408	yes
AT3G45260	AT3G45260	Chr3:16595048-16599064	q1	q2	OK	17.6265	7.96076	-1.14677	-3.27776	5e-05	0.00101408	yes
AT3G45430	AT3G45430	Chr3:16660574-16664146	q1	q2	OK	3.24334	0.747142	-2.11802	-3.87241	5e-05	0.00101408	yes
AT3G46660	AT3G46660	Chr3:17188838-17191349	q1	q2	OK	7.94556	0.348795	-4.5097	-2.65405	0.0023	0.0238043	yes
AT3G47340	AT3G47340	Chr3:17437839-17441567	q1	q2	OK	92.9986	9.92718	-3.22775	-6.6341	5e-05	0.00101408	yes
AT3G47500	AT3G47500	Chr3:17503228-17506124	q1	q2	OK	15.7645	7.71993	-1.03002	-2.66304	5e-05	0.00101408	yes
AT3G48340	AT3G48340	Chr3:17897505-17899351	q1	q2	OK	2.89683	1.17126	-1.30641	-2.29883	0.0003	0.00471339	yes
AT3G48850	AT3G48850	Chr3:18114525-18116569	q1	q2	OK	1.4214	0.48322	-1.55655	-2.0688	0.0023	0.0238043	yes
AT3G49160	AT3G49160	Chr3:18220777-18224905	q1	q2	OK	1.92921	0.717832	-1.42629	-2.38279	5e-05	0.00101408	yes
AT3G49620	AT3G49620	Chr3:18393746-18397050	q1	q2	OK	4.73884	1.30354	-1.8621	-3.4774	5e-05	0.00101408	yes
AT3G49950	AT3G49950	Chr3:18522465-18523934	q1	q2	OK	1.34955	0.408107	-1.72546	-2.16522	0.00205	0.0218162	yes
AT3G50890	AT3G50890	Chr3:18916013-18917386	q1	q2	OK	7.4807	3.61149	-1.05058	-2.30924	0.0001	0.00186768	yes
AT3G50970	AT3G50970	Chr3:18940642-18941611	q1	q2	OK	47.6468	17.3246	-1.45956	-4.06156	5e-05	0.00101408	yes
AT3G51440	AT3G51440	Chr3:19089025-19090662	q1	q2	OK	2.25403	1.07081	-1.0738	-1.72728	0.0047	0.040871	yes
AT3G51450	AT3G51450	Chr3:19090946-19092511	q1	q2	OK	26.3806	8.49913	-1.63409	-4.32213	5e-05	0.00101408	yes
AT3G52770	AT3G52770	Chr3:19557515-19559323	q1	q2	OK	1.834	0.54844	-1.74159	-1.97773	0.0047	0.040871	yes
AT3G53230	AT3G53230	Chr3:19723349-19727128	q1	q2	OK	9.79054	4.64594	-1.07542	-3.01285	5e-05	0.00101408	yes
AT3G54500	AT3G54500	Chr3:20173604-20179070	q1	q2	OK	23.408	6.13748	-1.93129	-5.38674	5e-05	0.00101408	yes
AT3G55230	AT3G55230	Chr3:20471786-20472946	q1	q2	OK	7.38055	3.0085	-1.29468	-2.64281	5e-05	0.00101408	yes
AT3G55880	AT3G55880	Chr3:20736507-20738967	q1	q2	OK	11.6098	5.40416	-1.1032	-2.67954	5e-05	0.00101408	yes
AT3G55970	AT3G55970	Chr3:20766734-20769598	q1	q2	OK	1.37203	0.20351	-2.75314	-2.42576	0.00435	0.0386159	yes
AT3G57500	AT3G57500	Chr3:21281803-21282591	q1	q2	OK	3.93911	1.70076	-1.21169	-1.79509	0.0045	0.0396599	yes
AT3G58070	AT3G58070	Chr3:21506571-21507739	q1	q2	OK	5.08137	2.46246	-1.04512	-1.97336	0.001	0.0123687	yes
AT3G61970	AT3G61970	Chr3:22951322-22953265	q1	q2	OK	4.98796	2.45284	-1.024	-2.33229	0.00025	0.00405464	yes
AT3G62780	AT3G62780	Chr3:23221263-23222995	q1	q2	OK	1.76337	0.580934	-1.60189	-2.07888	0.0025	0.0254574	yes
AT4G00080	AT4G00080	Chr4:32747-33756	q1	q2	OK	2.36593	0.922088	-1.35943	-1.84975	0.0038	0.0351012	yes
AT4G01870	AT4G01870	Chr4:808375-810611	q1	q2	OK	118.652	38.6499	-1.61819	-4.75579	5e-05	0.00101408	yes
AT4G03210	AT4G03210	Chr4:1415616-1417444	q1	q2	OK	232.27	111.676	-1.05648	-2.96467	5e-05	0.00101408	yes
AT4G03600	AT4G03600	Chr4:1603637-1604628	q1	q2	OK	2.93695	0.817895	-1.84433	-2.42901	0.0012	0.0143707	yes
AT4G04490	AT4G04490	Chr4:2231535-2234689	q1	q2	OK	2.13955	0.867673	-1.30208	-2.33539	0.0002	0.00335767	yes
AT4G11320	AT4G11320	Chr4:6887165-6889879	q1	q2	OK	62.6227	29.7423	-1.07417	-3.2155	5e-05	0.00101408	yes
AT4G11880	AT4G11880	Chr4:7142921-7147391	q1	q2	OK	1.41983	0.329842	-2.10587	-1.54367	0.0052	0.0440841	yes
AT4G12550	AT4G12550	Chr4:7438811-7440116	q1	q2	OK	3.9043	1.06042	-1.88042	-2.1458	0.0022	0.0229879	yes
AT4G14130	AT4G14130	Chr4:8135123-8138392	q1	q2	OK	15.6025	3.90054	-2.00003	-3.40738	5e-05	0.00101408	yes
AT4G14400	AT4G14400	Chr4:8294164-8299195	q1	q2	OK	82.3143	19.4062	-2.08462	-5.51593	5e-05	0.00101408	yes
AT4G15160	AT4G15160	Chr4:8646149-8647252	q1	q2	OK	5.7001	2.44597	-1.22058	-2.28008	0.00025	0.00405464	yes
AT4G15440	AT4G15440	Chr4:8835367-8838676	q1	q2	OK	7.54759	2.73287	-1.4656	-3.27543	5e-05	0.00101408	yes
AT4G15610	AT4G15610	Chr4:8908762-8910945	q1	q2	OK	14.8204	7.38262	-1.00538	-2.62859	5e-05	0.00101408	yes
AT4G16740	AT4G16740	Chr4:9407610-9411140	q1	q2	OK	4.25729	1.25663	-1.76038	-2.97458	5e-05	0.00101408	yes
AT4G17140	AT4G17140	Chr4:9613329-9636873	q1	q2	OK	26.766	10.6703	-1.3268	-3.92398	5e-05	0.00101408	yes
AT4G21380	AT4G21380	Chr4:11388826-11393226	q1	q2	OK	8.02028	1.76603	-2.18314	-5.45814	5e-05	0.00101408	yes
AT4G21600	AT4G21600	Chr4:11484980-11487535	q1	q2	OK	2.33628	1.10603	-1.07883	-1.77678	0.0031	0.0299483	yes
AT4G21850	AT4G21850	Chr4:11591115-11592425	q1	q2	OK	11.811	5.56917	-1.08459	-2.39672	0.0002	0.00335767	yes
AT4G23600	AT4G23600	Chr4:12310378-12313212	q1	q2	OK	71.2559	33.4103	-1.09272	-3.14308	5e-05	0.00101408	yes
AT4G25760	AT4G25760	Chr4:13116027-13116955	q1	q2	OK	4.6677	1.60793	-1.53751	-2.44694	0.0001	0.00186768	yes
AT4G26540	AT4G26540	Chr4:13394446-13398307	q1	q2	OK	30.5845	12.4663	-1.29477	-3.99329	5e-05	0.00101408	yes
AT4G27440	AT4G27440	Chr4:13725545-13729002	q1	q2	OK	625.593	276.422	-1.17835	-3.223	5e-05	0.00101408	yes
AT4G27950	AT4G27950	Chr4:13909216-13910995	q1	q2	OK	4.87276	1.4185	-1.78037	-3.3283	5e-05	0.00101408	yes
AT4G28720	AT4G28720	Chr4:14192568-14194302	q1	q2	OK	1.12107	0.354512	-1.66097	-2.03363	0.00265	0.0265977	yes
AT4G29190	AT4G29190	Chr4:14391848-14393381	q1	q2	OK	53.4422	22.3024	-1.26078	-3.64743	5e-05	0.00101408	yes
AT4G29690	AT4G29690	Chr4:14540877-14542565	q1	q2	OK	1.02788	0.385998	-1.41301	-1.80395	0.0059	0.0481837	yes
AT4G29800	AT4G29800	Chr4:14590644-14592825	q1	q2	OK	1.27186	0.584962	-1.12052	-1.68603	0.006	0.0486556	yes
AT4G30170	AT4G30170	Chr4:14762818-14764636	q1	q2	OK	17.1956	6.9427	-1.30847	-3.36303	5e-05	0.00101408	yes
AT4G31290	AT4G31290	Chr4:15185774-15188484	q1	q2	OK	87.6971	40.2913	-1.12206	-3.42695	5e-05	0.00101408	yes
AT4G32280	AT4G32280	Chr4:15583331-15584903	q1	q2	OK	3.69358	1.72618	-1.09744	-1.8559	0.0017	0.0188491	yes
AT4G33467	AT4G33467	Chr4:16100708-16102220	q1	q2	OK	16.9162	6.27005	-1.43186	-2.74402	5e-05	0.00101408	yes
AT4G33625	AT4G33625	Chr4:16147593-16154742	q1	q2	OK	86.5287	40.6541	-1.08978	-3.00018	5e-05	0.00101408	yes
AT4G33810	AT4G33810	Chr4:16213173-16216310	q1	q2	OK	2.84707	1.15939	-1.29611	-2.34861	0.0001	0.00186768	yes
AT4G34580	AT4G34580	Chr4:16515101-16518746	q1	q2	OK	2.70605	1.07747	-1.32855	-2.46489	0.00015	0.00266679	yes
AT4G35060	AT4G35060	Chr4:16685611-16686818	q1	q2	OK	5.06879	2.13113	-1.25003	-2.28862	0.00055	0.00772999	yes
AT4G35770	AT4G35770	Chr4:16944877-16946266	q1	q2	OK	98.2843	20.1068	-2.28928	-5.11506	5e-05	0.00101408	yes
AT4G36850	AT4G36850	Chr4:17353290-17356037	q1	q2	OK	47.2565	22.6561	-1.06062	-2.51173	0.0002	0.00335767	yes
AT4G36950	AT4G36950	Chr4:17422537-17423953	q1	q2	OK	1.70588	0.186297	-3.19484	-2.50399	0.00605	0.0489598	yes
AT4G37220	AT4G37220	Chr4:17515041-17516162	q1	q2	OK	4.07113	1.00142	-2.02338	-2.69847	0.0003	0.00471339	yes
AT4G37400	AT4G37400	Chr4:17583991-17586442	q1	q2	OK	1.46304	0.422473	-1.79203	-2.53073	0.0003	0.00471339	yes
AT4G38850	AT4G38850	Chr4:18126056-18126829	q1	q2	OK	4.9315	1.44099	-1.77497	-2.58444	0.00065	0.00888681	yes
AT4G40065	AT4G40065	Chr4:18574502-18575585	q1	q2	OK	16.6188	5.9318	-1.48627	-3.57105	5e-05	0.00101408	yes
AT4G40070	AT4G40070	Chr4:18576215-18577774	q1	q2	OK	1.76243	0.426129	-2.04821	-2.73003	0.0002	0.00335767	yes
AT5G00560	AT5G00560	Chr5:15631829-15632522	q1	q2	OK	4.91603	1.20583	-2.02747	-2.59352	0.0006	0.00830169	yes
AT5G01870	AT5G01870	Chr5:337127-337914	q1	q2	OK	33.4599	9.70644	-1.78542	-4.19614	5e-05	0.00101408	yes
AT5G02550	AT5G02550	Chr5:572969-573634	q1	q2	OK	17.8996	8.57899	-1.06105	-2.27561	0.0004	0.00598686	yes
AT5G02810	AT5G02810	Chr5:637680-642030	q1	q2	OK	55.9868	22.9915	-1.28399	-3.80313	5e-05	0.00101408	yes
AT5G03350	AT5G03350	Chr5:814003-816670	q1	q2	OK	71.859	15.5136	-2.21164	-4.18988	5e-05	0.00101408	yes
AT5G04820	AT5G04820	Chr5:1399394-1400784	q1	q2	OK	11.7651	5.79575	-1.02144	-2.57801	5e-05	0.00101408	yes
AT5G05320	AT5G05320	Chr5:1574861-1576731	q1	q2	OK	1.87269	0.891949	-1.07008	-1.68879	0.00595	0.0484105	yes
AT5G05600	AT5G05600	Chr5:1672069-1674770	q1	q2	OK	48.1511	13.4377	-1.84128	-4.78667	5e-05	0.00101408	yes
AT5G05880	AT5G05880	Chr5:1769526-1771737	q1	q2	OK	1.46857	0.596234	-1.30046	-1.9363	0.00265	0.0265977	yes
AT5G06930	AT5G06930	Chr5:2144524-2150771	q1	q2	OK	3.53022	1.66983	-1.08005	-1.94094	0.00095	0.0118929	yes
AT5G10300	AT5G10300	Chr5:3239454-3240883	q1	q2	OK	7.82097	2.173	-1.84766	-3.54021	5e-05	0.00101408	yes
AT5G10625	AT5G10625	Chr5:3358786-3359817	q1	q2	OK	4.31584	1.5912	-1.43952	-2.31914	0.00045	0.00655982	yes
AT5G12030	AT5G12030	Chr5:3883956-3884838	q1	q2	OK	3.57747	0.306835	-3.54341	-2.68229	0.0003	0.00471339	yes
AT5G12050	AT5G12050	Chr5:3889905-3891514	q1	q2	OK	11.59	3.55598	-1.70456	-4.00351	5e-05	0.00101408	yes
AT5G13320	AT5G13320	Chr5:4267455-4271064	q1	q2	OK	3.09051	0.685146	-2.17336	-3.88607	5e-05	0.00101408	yes
AT5G14180	AT5G14180	Chr5:4571293-4574679	q1	q2	OK	2.64357	1.17166	-1.17393	-1.68434	0.00265	0.0265977	yes
AT5G14330	AT5G14330	Chr5:4619726-4620551	q1	q2	OK	19.63	9.20883	-1.09197	-2.28579	0.00045	0.00655982	yes
AT5G15960	AT5G15960	Chr5:5209716-5210826	q1	q2	OK	69.2136	28.5356	-1.27829	-3.57515	5e-05	0.00101408	yes
AT5G15970	AT5G15970	Chr5:5211718-5212743	q1	q2	OK	2128.39	758.49	-1.48856	-4.18635	5e-05	0.00101408	yes
AT5G16410	AT5G16410	Chr5:5365596-5367612	q1	q2	OK	2.36165	1.02324	-1.20665	-2.12801	0.0004	0.00598686	yes
AT5G16960	AT5G16960	Chr5:5573595-5575910	q1	q2	OK	2.33488	0.8741	-1.41748	-2.10433	0.0005	0.00718182	yes
AT5G17390	AT5G17390	Chr5:5727472-5728688	q1	q2	OK	1.75669	0.574677	-1.61203	-1.93659	0.00395	0.0361459	yes
AT5G17460	AT5G17460	Chr5:5757072-5759817	q1	q2	OK	18.6769	9.10315	-1.03681	-3.07686	5e-05	0.00101408	yes
AT5G17490	AT5G17490	Chr5:5763988-5766246	q1	q2	OK	3.50581	1.28264	-1.45063	-2.95739	5e-05	0.00101408	yes
AT5G18010	AT5G18010	Chr5:5962772-5963405	q1	q2	OK	4.50962	0.976332	-2.20756	-2.41927	0.0019	0.0205776	yes
AT5G18020	AT5G18020	Chr5:5966182-5966785	q1	q2	OK	16.36	4.46388	-1.8738	-3.33661	5e-05	0.00101408	yes
AT5G18030	AT5G18030	Chr5:5968351-5970251	q1	q2	OK	13.1647	5.71106	-1.20484	-2.5467	5e-05	0.00101408	yes
AT5G18050	AT5G18050	Chr5:5974340-5975087	q1	q2	OK	5.75191	1.32414	-2.11898	-2.79161	0.0002	0.00335767	yes
AT5G18060	AT5G18060	Chr5:5975779-5976727	q1	q2	OK	6.36158	1.79573	-1.82482	-2.79023	0.0001	0.00186768	yes
AT5G19800	AT5G19800	Chr5:6690519-6691176	q1	q2	OK	1.3606	0.248067	-2.45544	-1.53225	0.00465	0.0406165	yes
AT5G20420	AT5G20420	Chr5:6898789-6904242	q1	q2	OK	1.00349	0.358727	-1.48406	-2.62124	5e-05	0.00101408	yes
AT5G22140	AT5G22140	Chr5:7340054-7341959	q1	q2	OK	40.1254	8.30393	-2.27265	-6.22247	5e-05	0.00101408	yes
AT5G22890	AT5G22890	Chr5:7653256-7654835	q1	q2	OK	2.46625	1.14116	-1.11182	-1.91606	0.00185	0.0201698	yes
AT5G23980	AT5G23980	Chr5:8097977-8101330	q1	q2	OK	4.68866	2.15621	-1.12068	-2.62644	0.0001	0.00186768	yes
AT5G24470	AT5G24470	Chr5:8356203-8358546	q1	q2	OK	67.5328	30.1491	-1.16348	-3.20709	5e-05	0.00101408	yes
AT5G24770	AT5G24770	Chr5:8499836-8502224	q1	q2	OK	289.656	102.244	-1.50233	-4.41795	5e-05	0.00101408	yes
AT5G24780	AT5G24780	Chr5:8507589-8509201	q1	q2	OK	48.3474	19.1194	-1.3384	-3.8767	5e-05	0.00101408	yes
AT5G25830	AT5G25830	Chr5:9004235-9005941	q1	q2	OK	3.60925	1.67655	-1.1062	-2.15458	0.0005	0.00718182	yes
AT5G25880	AT5G25880	Chr5:9024333-9028712	q1	q2	OK	1.35704	0.543214	-1.32087	-2.01998	0.00075	0.00992838	yes
AT5G26340	AT5G26340	Chr5:9243397-9247540	q1	q2	OK	51.2883	23.6621	-1.11605	-3.43019	5e-05	0.00101408	yes
AT5G28237	AT5G28237	Chr5:10207286-10213598	q1	q2	OK	3.33917	0.245306	-3.76684	-3.81322	0.0002	0.00335767	yes
AT5G35926	AT5G35926	Chr5:14062675-14066518	q1	q2	OK	1.12931	0.491142	-1.20123	-1.69747	0.0054	0.0452703	yes
AT5G39240	AT5G39240	Chr5:15712548-15713158	q1	q2	OK	7.21356	3.22819	-1.15999	-1.79519	0.0033	0.0313396	yes
AT5G40450	AT5G40450	Chr5:16181627-16195888	q1	q2	OK	36.1896	16.5117	-1.13209	-3.19457	5e-05	0.00101408	yes
AT5G40510	AT5G40510	Chr5:16228959-16231142	q1	q2	OK	2.5948	0.968533	-1.42175	-2.25631	0.00055	0.00772999	yes
AT5G40730	AT5G40730	Chr5:16301071-16301748	q1	q2	OK	24.0737	10.8035	-1.15596	-2.65049	5e-05	0.00101408	yes
AT5G40800	AT5G40800	Chr5:16334580-16336017	q1	q2	OK	1.15464	0.340677	-1.76097	-1.9823	0.0048	0.0415011	yes
AT5G42092	AT5G42092	Chr5:16826321-16829101	q1	q2	OK	58.3	9.75161	-2.57978	-5.94309	5e-05	0.00101408	yes
AT5G44260	AT5G44260	Chr5:17829617-17831336	q1	q2	OK	22.0089	7.64909	-1.52473	-3.29793	5e-05	0.00101408	yes
AT5G44610	AT5G44610	Chr5:17993534-17994722	q1	q2	OK	10.426	3.12014	-1.7405	-3.09121	5e-05	0.00101408	yes
AT5G44973	AT5G44973	Chr5:18157609-18158264	q1	q2	OK	5.32639	0.500519	-3.41166	-2.40939	0.00325	0.0309849	yes
AT5G45820	AT5G45820	Chr5:18586869-18588792	q1	q2	OK	8.16924	2.20159	-1.89166	-4.12452	5e-05	0.00101408	yes
AT5G45830	AT5G45830	Chr5:18589417-18591506	q1	q2	OK	1.74804	0.567744	-1.62242	-1.65118	0.0016	0.0180467	yes
AT5G46690	AT5G46690	Chr5:18945542-18947637	q1	q2	OK	31.2274	14.0086	-1.15649	-3.24811	5e-05	0.00101408	yes
AT5G46720	AT5G46720	Chr5:18959093-18959852	q1	q2	OK	4.67694	2.12629	-1.13722	-1.75722	0.0046	0.0402875	yes
AT5G46871	AT5G46871	Chr5:19017941-19019752	q1	q2	OK	4.96305	1.30228	-1.93019	-2.45293	0.001	0.0123687	yes
AT5G46890	AT5G46890	Chr5:19036295-19036938	q1	q2	OK	6.6158	0.945667	-2.80651	-2.85479	0.00165	0.0184093	yes
AT5G46900	AT5G46900	Chr5:19039700-19040456	q1	q2	OK	6.75658	0.845639	-2.99818	-3.62244	0.0001	0.00186768	yes
AT5G47240	AT5G47240	Chr5:19183522-19185644	q1	q2	OK	53.6362	21.2923	-1.33287	-3.88241	5e-05	0.00101408	yes
AT5G47590	AT5G47590	Chr5:19297613-19299174	q1	q2	OK	1.25154	0.198669	-2.65526	-1.88514	0.00385	0.0354461	yes
AT5G47990	AT5G47990	Chr5:19434757-19436749	q1	q2	OK	1.67863	0.797183	-1.0743	-1.80384	0.0028	0.0277479	yes
AT5G48110	AT5G48110	Chr5:19500987-19504540	q1	q2	OK	1.01825	0.36044	-1.49826	-2.0717	0.00165	0.0184093	yes
AT5G48570	AT5G48570	Chr5:19690460-19693845	q1	q2	OK	9.76028	3.87547	-1.33255	-3.42924	5e-05	0.00101408	yes
AT5G51780	AT5G51780	Chr5:21034625-21037317	q1	q2	OK	1.49149	0.406378	-1.87586	-1.74633	0.006	0.0486556	yes
AT5G51790	AT5G51790	Chr5:21039532-21041618	q1	q2	OK	2.73509	0.497739	-2.45813	-2.21436	0.0001	0.00186768	yes
AT5G51830	AT5G51830	Chr5:21069109-21071739	q1	q2	OK	33.9115	14.9817	-1.17858	-3.46924	5e-05	0.00101408	yes
AT5G52070	AT5G52070	Chr5:21161131-21165565	q1	q2	OK	4.66328	2.31763	-1.00869	-1.96043	0.001	0.0123687	yes
AT5G52310	AT5G52310	Chr5:21240716-21243644	q1	q2	OK	218.331	75.6534	-1.52904	-4.27415	5e-05	0.00101408	yes
AT5G53110	AT5G53110	Chr5:21528949-21533159	q1	q2	OK	1.70803	0.751774	-1.18396	-1.69586	0.00555	0.0460354	yes
AT5G53250	AT5G53250	Chr5:21603568-21604414	q1	q2	OK	3.43559	0.931066	-1.8836	-2.29255	0.0021	0.0221916	yes
AT5G54190	AT5G54190	Chr5:21990863-21992814	q1	q2	OK	4.92924	0.582566	-3.08087	-4.54664	5e-05	0.00101408	yes
AT5G54270	AT5G54270	Chr5:22038164-22046358	q1	q2	OK	1885.4	710.021	-1.40893	-3.74562	5e-05	0.00101408	yes
AT5G54370	AT5G54370	Chr5:22075276-22076819	q1	q2	OK	3.39826	1.59842	-1.08815	-1.92714	0.00135	0.0157342	yes
AT5G55170	AT5G55170	Chr5:22385256-22386223	q1	q2	OK	4.70942	1.3592	-1.7928	-2.11511	0.0007	0.00939986	yes
AT5G56490	AT5G56490	Chr5:22871462-22873501	q1	q2	OK	1.92987	0.918921	-1.07049	-1.84866	0.0023	0.0238043	yes
AT5G56540	AT5G56540	Chr5:22893150-22893651	q1	q2	OK	31.9269	15.0822	-1.08193	-2.31314	0.00035	0.00538665	yes
AT5G57090	AT5G57090	Chr5:23100515-23105228	q1	q2	OK	2.10987	0.729068	-1.53303	-2.96089	5e-05	0.00101408	yes
AT5G57550	AT5G57550	Chr5:23304781-23306440	q1	q2	OK	2.89704	0.675664	-2.1002	-2.69945	0.0002	0.00335767	yes
AT5G57660	AT5G57660	Chr5:23355336-23356989	q1	q2	OK	97.5162	33.4377	-1.54417	-4.42131	5e-05	0.00101408	yes
AT5G59090	AT5G59090	Chr5:23851678-23855499	q1	q2	OK	3.69757	1.26267	-1.5501	-3.25869	5e-05	0.00101408	yes
AT5G59510	AT5G59510	Chr5:23989754-23990824	q1	q2	OK	3.05123	0.96453	-1.66149	-2.36451	0.00035	0.00538665	yes
AT5G59520	AT5G59520	Chr5:23991212-23992908	q1	q2	OK	9.96467	4.3598	-1.19256	-2.88418	5e-05	0.00101408	yes
AT5G60530	AT5G60530	Chr5:24333906-24335858	q1	q2	OK	2.04081	0.870743	-1.22882	-2.05931	0.0012	0.0143707	yes
AT5G60900	AT5G60900	Chr5:24498368-24501770	q1	q2	OK	1.96308	0.693671	-1.5008	-2.67959	0.0001	0.00186768	yes
AT5G62260	AT5G62260	Chr5:25008842-25011666	q1	q2	OK	1.76529	0.843472	-1.06549	-1.7518	0.00285	0.0281438	yes
AT5G62280	AT5G62280	Chr5:25016859-25018265	q1	q2	OK	8.53733	3.94967	-1.11205	-2.33581	5e-05	0.00101408	yes
AT5G63560	AT5G63560	Chr5:25449310-25451419	q1	q2	OK	7.21766	3.58427	-1.00985	-2.37051	0.0002	0.00335767	yes
AT5G64230	AT5G64230	Chr5:25692424-25694137	q1	q2	OK	14.3678	5.79024	-1.31115	-3.38018	5e-05	0.00101408	yes
AT5G65040	AT5G65040	Chr5:25977494-25978439	q1	q2	OK	4.64002	1.48249	-1.64611	-2.43961	0.0004	0.00598686	yes
AT5G66390	AT5G66390	Chr5:26515904-26517599	q1	q2	OK	6.53679	2.64145	-1.30725	-2.77495	5e-05	0.00101408	yes
