# Supplementary material for: RBV, an evolutionarily conserved WD40 repeat protein, promotes microRNA biogenesis and loading into ARGONAUTE1 in Arabidopsis
Source: Research Square preprint supplement (doi:10.21203/rs.3.rs-536724/v1), 2021-06-02
Supplement: Supplementary file 9 [file e63c24aeca2a62d90bfc3c48.xlsx]

## Sheet: Supplementary Data 8
Supplementary Data 8. List of Genes with intron retention in the rbv-1 mutant.
Intron_id	Gene_id	Strand	Chr	Start	End	Annotated	Attributes	Inclusion_counts_SAMPLE1	Skipping_counts_SAMPLE1	Inclusion_counts_SAMPLE2	Skipping_counts_SAMPLE2	Inclusion_length	Skipping_length	PValue_rMATS	FDR_rMATS	PI_Junction_SAMPLE1	PI_Junction_SAMPLE2	Diff_PI_Junction	Observed_counts_SAMPLE1	Expected_counts_SAMPLE1	Observed_counts_SAMPLE2	Expected_counts_SAMPLE2	PValue_DEXSeq	FDR_DEXSeq	PI_Density_SAMPLE1	PI_Density_SAMPLE2	Diff_PI_Density	Combined_FDR
Chr1_10016681_10016868	AT1G28490	+	Chr1	10016681	10016868	FALSE	EI	10,9,19	52,45,74	71,67,65	34,32,41	270	135	0	0	0.088,0.091,0.114	0.511,0.511,0.442	-0.39	10,11,23	95,83,118	82,86,81	43,55,61	4.66949e-19	1.029e-16	0.105263157895,0.132530120482,0.194915254237	1,1,1	-0.855764	0.0291525
Chr1_1007376_1007458	AT1G03930	+	Chr1	1007376	1007458	FALSE	U	20,5,15	52,43,69	82,100,96	34,52,25	270	135	0	0	0.161,0.055,0.098	0.547,0.49,0.658	-0.46	20,5,15	30,26,34	82,100,96	34,41,37	1.32048e-20	3.37756e-18	0.666666666667,0.192307692308,0.441176470588	1,1,1	-0.566616	0.0113636
Chr1_10292498_10292588	AT1G29400	-	Chr1	10292498	10292588	FALSE	U	0,2,6	101120121	75,88,57	88,95,92	270	135	0	0	0.0,0.008,0.024	0.299,0.317,0.237	-0.274	0,2,6	85,81,100	75,88,57	80,93,95	2.60101e-20	6.49066e-18	0.0,0.0246913580247,0.06	0.9375,0.94623655914,0.6	-0.799682	0.0288571
Chr1_10818299_10818385	AT1G30540	-	Chr1	10818299	10818385	FALSE	U	0,0,0	28,20,31	24,23,14	22,27,24	270	135	0	0	0.0,0.0,0.0	0.353,0.299,0.226	-0.293	0,0,0	18,17,18	24,23,14	25,23,21	2.04615e-13	2.20697e-11	0.0,0.0,0.0	0.96,1.0,0.666666666667	-0.875556	0.0374038
Chr1_10948630_10948707	AT1G30820	-	Chr1	10948630	10948707	FALSE	U	0,0,0	81133107	29,15,24	119,67,95	270	135	0	0	0.0,0.0,0.0	0.109,0.101,0.112	-0.107	0,0,0	56,74,58	29,15,24	72,50,74	1.21393e-17	2.30002e-15	0.0,0.0,0.0	0.402777777778,0.3,0.324324324324	-0.342367	0.0313669
Chr1_11001621_11001707	AT1G30910	+	Chr1	11001621	11001707	FALSE	U	1,1,1	69,47,85	18,43,23	42,51,57	270	135	0	0	0.007,0.011,0.006	0.176,0.297,0.168	-0.206	1,1,1	31,26,38	18,43,23	18,27,25	1.47262e-15	2.16566e-13	0.0322580645161,0.0384615384615,0.0263157894737	1.0,1,0.92	-0.940988	0.0366667
Chr1_1106991_1107069	AT1G04190	-	Chr1	1106991	1107069	FALSE	U	2,0,3	43,30,47	38,34,55	34,34,32	270	135	0	0	0.023,0.0,0.031	0.358,0.333,0.462	-0.366	2,0,3	34,19,33	38,34,55	38,35,37	4.38738e-16	6.99822e-14	0.0588235294118,0.0,0.0909090909091	1.0,0.971428571429,1	-0.940565	0.0127586
Chr1_11162287_11162401	AT1G31230	-	Chr1	11162287	11162401	FALSE	U	0,0,0	92,63,129	49,35,34	110108146	270	135	0	0	0.0,0.0,0.0	0.182,0.139,0.104	-0.142	0,0,0	81,51,98	49,35,34	97107117	1.06777e-17	2.03384e-15	0.0,0.0,0.0	0.505154639175,0.327102803738,0.290598290598	-0.374285	0.0311189
Chr1_11530693_11530774	AT1G32050	+	Chr1	11530693	11530774	FALSE	U	1,0,0	287234325	35,45,38	239301308	270	135	0	0	0.002,0.0,0.0	0.068,0.07,0.058	-0.065	1,0,0	149136185	35,45,38	158166175	1.56989e-26	7.0713e-24	0.00671140939597,0.0,0.0	0.221518987342,0.271084337349,0.217142857143	-0.234345	0.0221918
Chr1_11538604_11538691	AT1G32080	-	Chr1	11538604	11538691	FALSE	U	9,1,3	670577757	127132139	654860747	270	135	0	0	0.007,0.001,0.002	0.089,0.071,0.085	-0.078	9,1,3	429355454	127132139	458547483	3.83923e-55	1.14567e-51	0.020979020979,0.00281690140845,0.00660792951542	0.277292576419,0.241316270567,0.287784679089	-0.258663	0.0125
Chr1_1188007_1188186	AT1G04400	-	Chr1	1188007	1188186	FALSE	EI	12,11,5	238283280	57,78,54	217227216	270	135	0	0	0.025,0.019,0.009	0.116,0.147,0.111	-0.107	12,12,6	357395434	58,83,56	380369365	2.71349e-14	3.31069e-12	0.0336134453782,0.0303797468354,0.0138248847926	0.152631578947,0.224932249322,0.153424657534	-0.151057	0.0145238
Chr1_1203591_1203697	AT1G04440	+	Chr1	1203591	1203697	FALSE	U	2,0,0	70,91,93	20,21,26	72,82,78	270	135	0	0	0.014,0.0,0.0	0.122,0.114,0.143	-0.122	2,0,0	47,59,69	20,21,26	61,60,57	1.4278e-14	1.84914e-12	0.0425531914894,0.0,0.0	0.327868852459,0.35,0.456140350877	-0.363819	0.0148837
Chr1_12074278_12074343	AT1G33290	+	Chr1	12074278	12074343	FALSE	E	8,3,2	166149153	34,30,35	149138144	270	135	0	0	0.024,0.01,0.006	0.102,0.098,0.108	-0.089	8,3,2	52,37,57	34,30,35	48,54,45	6.06823e-13	5.99449e-11	0.153846153846,0.0810810810811,0.0350877192982	0.708333333333,0.555555555556,0.777777777778	-0.590551	0.0390678
Chr1_124633_124713	AT1G01320	-	Chr1	124633	124713	FALSE	U	0,0,2	268168299	53,50,44	316320315	270	135	0	0	0.0,0.0,0.003	0.077,0.072,0.065	-0.07	0,0,2	233178269	53,50,44	302314307	5.40702e-27	2.49836e-24	0.0,0.0,0.00743494423792	0.175496688742,0.15923566879,0.14332247557	-0.156873	0.0133333
Chr1_12535007_12535395	AT1G34350	+	Chr1	12535007	12535395	FALSE	EI	0,0,0	35,31,45	26,15,19	48,45,45	270	135	9.99201e-16	1.67753e-13	0.0,0.0,0.0	0.213,0.143,0.174	-0.177	0,0,0	150126159	38,28,30	212177188	8.97128e-20	2.1066e-17	0.0,0.0,0.0	0.179245283019,0.158192090395,0.159574468085	-0.165671	0.0732151
Chr1_1285804_1285895	AT1G04620	-	Chr1	1285804	1285895	FALSE	U	0,3,0	172162141	42,37,35	118120107	270	135	0	0	0.0,0.009,0.0	0.151,0.134,0.141	-0.139	0,3,0	69,51,68	42,37,35	60,67,61	3.11146e-23	1.03646e-20	0.0,0.0588235294118,0.0	0.7,0.55223880597,0.573770491803	-0.589062	0.0121739
Chr1_12978014_12978079	AT1G35340	+	Chr1	12978014	12978079	TRUE	U	16,15,22	101,88,103	100,103,85	50,69,39	270	135	0	0	0.073,0.079,0.096	0.5,0.427,0.521	-0.4	16,15,22	62,57,68	100,103,85	56,67,57	2.14246e-25	8.65911e-23	0.258064516129,0.263157894737,0.323529411765	1,1,1	-0.718416	0.023875
Chr1_13538917_13539006	AT1G36160	+	Chr1	13538917	13539006	FALSE	U	0,2,0	85,83,135	22,29,25	90,99,88	270	135	0	0	0.0,0.012,0.0	0.109,0.128,0.124	-0.116	0,2,0	68,52,80	22,29,25	77,78,81	1.42341e-15	2.10626e-13	0.0,0.0384615384615,0.0	0.285714285714,0.371794871795,0.308641975309	-0.30923	0.037193
Chr1_14025217_14025303	AT1G36980	+	Chr1	14025217	14025303	FALSE	U	10,7,13	381423477	86,105,95	326400361	270	135	0	0	0.013,0.008,0.013	0.117,0.116,0.116	-0.105	10,7,13	186171226	86,105,95	170193171	1.71825e-41	2.36652e-38	0.0537634408602,0.0409356725146,0.0575221238938	0.505882352941,0.544041450777,0.555555555556	-0.484419	0.0157143
Chr1_1563651_1563924	AT1G05350	-	Chr1	1563651	1563924	FALSE	U	2,2,1	41,37,40	36,32,42	29,36,37	270	135	0	0	0.024,0.026,0.012	0.383,0.308,0.362	-0.33	2,5,1	87,68,93	59,50,66	100,97,103	3.10564e-26	1.35624e-23	0.0229885057471,0.0735294117647,0.010752688172	0.59,0.515463917526,0.640776699029	-0.546323	0.0119048
Chr1_16277872_16277966	AT1G43190	-	Chr1	16277872	16277966	FALSE	U	0,0,1	126145168	36,28,24	167163182	270	135	0	0	0.0,0.0,0.003	0.097,0.079,0.062	-0.078	0,0,1	75,70,87	36,28,24	96,96,101	3.33108e-16	5.38529e-14	0.0,0.0,0.0114942528736	0.375,0.291666666667,0.237623762376	-0.297599	0.0361963
Chr1_16469767_16469860	AT1G43670	+	Chr1	16469767	16469860	FALSE	U	167,92,150	129514261513	519774637	150418701538	270	135	0	0	0.061,0.031,0.047	0.147,0.171,0.172	-0.117	167,92,150	482471568	519774637	565679582	2.09197e-13	2.24962e-11	0.346473029046,0.195329087049,0.264084507042	0.918584070796,1,1	-0.704232	0.0392641
Chr1_16485721_16485808	AT1G43700	+	Chr1	16485721	16485808	FALSE	U	7,6,7	88,83,93	52,35,51	73,72,69	270	135	0	0	0.038,0.035,0.036	0.263,0.196,0.27	-0.207	7,6,7	57,64,67	52,35,51	60,64,63	7.82295e-14	9.06589e-12	0.122807017544,0.09375,0.10447761194	0.866666666667,0.546875,0.809523809524	-0.63401	0.0390909
Chr1_16487320_16487398	AT1G43710	-	Chr1	16487320	16487398	FALSE	U	5,2,9	243189384	34,73,33	201252219	270	135	0	0	0.01,0.005,0.012	0.078,0.127,0.07	-0.083	5,2,9	103,77,139	34,73,33	77,95,90	1.03247e-10	7.35767e-09	0.0485436893204,0.025974025974,0.0647482014388	0.441558441558,0.768421052632,0.366666666667	-0.479127	0.0479461
Chr1_1653918_1654018	AT1G05570	-	Chr1	1653918	1654018	FALSE	U	0,0,0	41,30,46	25,27,22	32,26,34	270	135	0	0	0.0,0.0,0.0	0.281,0.342,0.244	-0.289	0,0,0	30,22,30	25,27,22	27,31,29	2.01884e-19	4.56111e-17	0.0,0.0,0.0	0.925925925926,0.870967741935,0.758620689655	-0.851838	0.0142424
Chr1_16623498_16624251	AT1G43860	-	Chr1	16623498	16624251	TRUE	U	3,1,3	60,64,81	23,16,21	36,53,46	270	135	3.77476e-15	5.84923e-13	0.024,0.008,0.018	0.242,0.131,0.186	-0.17	7,8,11	196195298	56,57,70	209239236	1.58737e-21	4.56569e-19	0.0357142857143,0.0410256410256,0.0369127516779	0.267942583732,0.238493723849,0.296610169492	-0.229798	0.0690164
Chr1_16848829_16848911	AT1G44446	-	Chr1	16848829	16848911	TRUE	U	4,2,7	52121110	67,103,92	70,103,72	270	135	0	0	0.037,0.008,0.031	0.324,0.333,0.39	-0.324	4,2,7	48,103,92	67,103,92	85,123,97	2.7144e-36	2.40003e-33	0.0833333333333,0.0194174757282,0.0760869565217	0.788235294118,0.837398373984,0.948453608247	-0.798417	0.0167347
Chr1_17179538_17179609	AT1G45474	+	Chr1	17179538	17179609	FALSE	U	16,10,6	433431560	72,83,99	409485437	270	135	0	0	0.018,0.011,0.005	0.081,0.079,0.102	-0.076	16,10,6	300258359	72,83,99	291331320	1.17805e-20	3.03492e-18	0.0533333333333,0.0387596899225,0.016713091922	0.247422680412,0.250755287009,0.309375	-0.232916	0.0290476
Chr1_17452585_17452673	AT1G47530	+	Chr1	17452585	17452673	FALSE	U	7,5,20	297271386	282264273	440427394	270	135	0	0	0.012,0.009,0.025	0.243,0.236,0.257	-0.23	7,5,20	138121170	282264273	240237225	9.95574e-79	1.18837e-74	0.0507246376812,0.0413223140496,0.117647058824	1,1,1	-0.930102	0.018
Chr1_17867470_17867809	AT1G48350	+	Chr1	17867470	17867809	FALSE	U	29,15,31	216118592164	197223229	147615731562	270	135	0	0	0.007,0.004,0.007	0.063,0.066,0.068	-0.06	49,33,56	421231574171	321369367	285831033010	4.69763e-132	3.36439e-127	0.0116334283001,0.0104529616725,0.0134260369216	0.112316305108,0.118917176926,0.121926910299	-0.105883	0.03
Chr1_17897771_17897896	AT1G48420	-	Chr1	17897771	17897896	FALSE	U	8,6,5	165134198	25,45,48	106116131	270	135	0	0	0.024,0.022,0.012	0.105,0.162,0.155	-0.121	8,6,5	120105143	25,45,48	94113100	6.79538e-12	5.85654e-10	0.0666666666667,0.0571428571429,0.034965034965	0.265957446809,0.398230088496,0.48	-0.328471	0.0454035
Chr1_17984307_17984396	AT1G48635	+	Chr1	17984307	17984396	FALSE	U	2,4,4	64,57,119	33,25,22	53,71,49	270	135	0	0	0.015,0.034,0.017	0.237,0.15,0.183	-0.168	2,4,4	31,21,47	33,25,22	26,30,27	4.3848e-12	3.86267e-10	0.0645161290323,0.190476190476,0.0851063829787	1,0.833333333333,0.814814814815	-0.76935	0.0450883
Chr1_1828905_1828986	AT1G06040	-	Chr1	1828905	1828986	TRUE	U	8,4,7	239249352	48,60,39	173286184	270	135	0	0	0.016,0.008,0.01	0.122,0.095,0.096	-0.093	8,4,7	133157207	48,60,39	120187130	9.24939e-22	2.7038e-19	0.0601503759398,0.0254777070064,0.0338164251208	0.4,0.320855614973,0.3	-0.30047	0.0133333
Chr1_18408472_18408579	AT1G49740	+	Chr1	18408472	18408579	FALSE	U	3,0,1	50,42,81	30,31,23	61,67,65	270	135	0	0	0.029,0.0,0.006	0.197,0.188,0.15	-0.167	3,0,1	55,33,55	30,31,23	62,73,63	4.68954e-13	4.73043e-11	0.0545454545455,0.0,0.0181818181818	0.483870967742,0.424657534247,0.365079365079	-0.400294	0.0428906
Chr1_18592727_18592810	AT1G50200	-	Chr1	18592727	18592810	FALSE	U	7,4,12	181114182	153176198	125117121	270	135	0	0	0.019,0.017,0.032	0.38,0.429,0.45	-0.397	7,4,12	152122172	153176198	139143143	7.11133e-69	5.65896e-65	0.0460526315789,0.0327868852459,0.0697674418605	1,1,1	-0.950464	0.0109091
Chr1_18704311_18704411	AT1G50480	+	Chr1	18704311	18704411	FALSE	U	16,17,13	278236331	61,77,86	259285283	270	135	0	0	0.028,0.035,0.019	0.105,0.119,0.132	-0.091	16,17,13	196172223	61,77,86	183200206	1.47258e-20	3.75318e-18	0.0816326530612,0.0988372093023,0.0582959641256	0.333333333333,0.385,0.417475728155	-0.299014	0.0310526
Chr1_18935674_18935742	AT1G51110	+	Chr1	18935674	18935742	FALSE	U	33,15,23	389302411	49,78,46	175193172	270	135	0	0	0.041,0.024,0.027	0.123,0.168,0.118	-0.106	33,15,23	143130169	49,78,46	75,88,79	1.40083e-08	6.29791e-07	0.230769230769,0.115384615385,0.136094674556	0.653333333333,0.886363636364,0.582278481013	-0.546576	0.0629923
Chr1_18935797_18935907	AT1G51110	+	Chr1	18935797	18935907	FALSE	U	2,1,6	368284405	16,22,23	157197172	270	135	4.44089e-16	7.68001e-14	0.003,0.002,0.007	0.048,0.053,0.063	-0.051	2,1,6	230209272	16,22,23	121141127	1.73153e-14	2.21447e-12	0.00869565217391,0.00478468899522,0.0220588235294	0.132231404959,0.156028368794,0.181102362205	-0.144608	0.0978223
Chr1_19099588_19099672	AT1G51500	-	Chr1	19099588	19099672	FALSE	U	1,2,4	188201270	43,36,45	215266296	270	135	0	0	0.003,0.005,0.007	0.091,0.063,0.071	-0.07	1,2,4	119104156	43,36,45	135165160	4.20618e-18	8.34466e-16	0.00840336134454,0.0192307692308,0.025641025641	0.318518518519,0.218181818182,0.28125	-0.254892	0.0361538
Chr1_19120962_19121042	AT1G51560	-	Chr1	19120962	19121042	FALSE	U	4,2,7	64,46,77	28,40,43	34,50,40	270	135	0	0	0.03,0.021,0.043	0.292,0.286,0.35	-0.278	4,2,7	30,22,35	28,40,43	29,31,27	2.82238e-13	2.9423e-11	0.133333333333,0.0909090909091,0.2	0.965517241379,1,1	-0.847092	0.0428409
Chr1_19183490_19183569	AT1G51720	+	Chr1	19183490	19183569	FALSE	U	3,0,0	45,40,48	48,62,32	49,62,49	270	135	0	0	0.032,0.0,0.0	0.329,0.333,0.246	-0.292	3,0,0	26,27,34	48,62,32	43,44,40	2.29956e-14	2.8692e-12	0.115384615385,0.0,0.0	1,1,0.8	-0.894872	0.0393249
Chr1_19478276_19478381	AT1G52310	+	Chr1	19478276	19478381	FALSE	U	0,0,1	56,48,73	23,18,20	56,52,50	270	135	0	0	0.0,0.0,0.007	0.17,0.148,0.167	-0.159	0,0,1	28,18,33	23,18,20	27,33,30	3.18677e-13	3.29816e-11	0.0,0.0,0.030303030303	0.851851851852,0.545454545455,0.666666666667	-0.67789	0.0430147
Chr1_19503304_19503385	AT1G52360	+	Chr1	19503304	19503385	FALSE	U	0,0,2	86,66,91	58,69,65	77,89,87	270	135	0	0	0.0,0.0,0.011	0.274,0.279,0.272	-0.271	0,0,2	60,50,71	58,69,65	74,77,84	1.475e-35	1.2428e-32	0.0,0.0,0.0281690140845	0.783783783784,0.896103896104,0.77380952381	-0.808509	0.0177586
Chr1_19503858_19503943	AT1G52360	+	Chr1	19503858	19503943	FALSE	U	0,0,0	99,94,139	44,25,38	152167172	270	135	0	0	0.0,0.0,0.0	0.126,0.07,0.099	-0.098	0,0,0	63,52,75	44,25,38	78,81,88	2.84163e-17	5.24523e-15	0.0,0.0,0.0	0.564102564103,0.308641975309,0.431818181818	-0.434854	0.0371264
Chr1_19522760_19522857	AT1G52410	+	Chr1	19522760	19522857	FALSE	I	4,0,2	120,43,132	17,24,19	30,55,43	270	135	0	0	0.016,0.0,0.008	0.221,0.179,0.181	-0.186	4,0,2	67,23,77	17,24,19	25,30,27	3.7941e-18	7.54805e-16	0.0597014925373,0.0,0.025974025974	0.68,0.8,0.703703703704	-0.699343	0.0363855
Chr1_19967601_19967679	AT1G53500	-	Chr1	19967601	19967679	FALSE	U	27,4,36	91,39,95	98134138	51,76,50	270	135	0	0	0.129,0.049,0.159	0.49,0.469,0.58	-0.401	27,4,36	45,26,49	98134138	42,50,45	2.30818e-05	0.000445933	0.6,0.153846153846,0.734693877551	1,1,1	-0.50382	0.0994539
Chr1_19990401_19990477	AT1G53570	+	Chr1	19990401	19990477	TRUE	I	11,9,14	53,70,72	66,63,47	60,57,49	270	135	0	0	0.094,0.06,0.089	0.355,0.356,0.324	-0.264	11,9,14	30,35,48	66,63,47	49,40,39	2.97193e-14	3.59538e-12	0.366666666667,0.257142857143,0.291666666667	1,1,1	-0.694841	0.04092
Chr1_20026812_20026904	AT1G53645	-	Chr1	20026812	20026904	FALSE	U	1,0,2	59,32,63	35,33,19	32,42,55	270	135	0	0	0.008,0.0,0.016	0.354,0.282,0.147	-0.253	1,0,2	31,18,32	35,33,19	31,33,32	7.06097e-12	6.05629e-10	0.0322580645161,0.0,0.0625	1,1.0,0.59375	-0.832997	0.048206
Chr1_20417986_20418071	AT1G54710	-	Chr1	20417986	20418071	FALSE	U	0,1,0	49,43,60	34,31,29	39,67,49	270	135	0	0	0.0,0.011,0.0	0.304,0.188,0.228	-0.236	0,1,0	21,16,26	34,31,29	21,29,23	1.07897e-18	2.27279e-16	0.0,0.0625,0.0	1,1,1	-0.979167	0.0364198
Chr1_20426501_20426576	AT1G54730	+	Chr1	20426501	20426576	FALSE	U	0,0,0	51,52,51	31,27,35	47,32,26	270	135	0	0	0.0,0.0,0.0	0.248,0.297,0.402	-0.316	0,0,0	28,27,33	31,27,35	25,29,26	4.78968e-23	1.54519e-20	0.0,0.0,0.0	1,0.931034482759,1	-0.977011	0.0294309
Chr1_20675801_20675876	AT1G55370	+	Chr1	20675801	20675876	TRUE	U	16,20,18	98,86,113	156187146	66,57,77	270	135	0	0	0.075,0.104,0.074	0.542,0.621,0.487	-0.466	16,20,18	31,32,37	156187146	43,53,46	4.49863e-39	5.11408e-36	0.516129032258,0.625,0.486486486486	1,1,1	-0.457461	0.0168085
Chr1_20807311_20807730	AT1G55680	-	Chr1	20807311	20807730	FALSE	U	2,5,7	77,88,107	37,51,37	120124119	270	135	1.31006e-14	1.84742e-12	0.013,0.028,0.032	0.134,0.171,0.135	-0.122	6,8,17	429376520	90,107,80	576598602	1.75426e-19	3.9759e-17	0.013986013986,0.0212765957447,0.0326923076923	0.15625,0.178929765886,0.132890365449	-0.133372	0.0800797
Chr1_20878002_20878123	AT1G55850	+	Chr1	20878002	20878123	FALSE	U	17,9,12	126,72,138	67,73,43	85,128,94	270	135	0	0	0.063,0.059,0.042	0.283,0.222,0.186	-0.176	17,9,12	130100165	67,73,43	122155126	8.42711e-11	6.1211e-09	0.130769230769,0.09,0.0727272727273	0.549180327869,0.470967741935,0.34126984127	-0.355974	0.052381
Chr1_21165468_21165541	AT1G56500	+	Chr1	21165468	21165541	FALSE	U	0,0,1	114,85,134	38,34,36	118177132	270	135	0	0	0.0,0.0,0.004	0.139,0.088,0.12	-0.114	0,0,1	79,71,98	38,34,36	92,103,97	3.29069e-23	1.09109e-20	0.0,0.0,0.0102040816327	0.413043478261,0.330097087379,0.371134020619	-0.368024	0.0296721
Chr1_21166149_21166244	AT1G56500	+	Chr1	21166149	21166244	FALSE	U	2,2,1	112136182	37,39,88	172175168	270	135	0	0	0.009,0.007,0.003	0.097,0.1,0.208	-0.129	2,2,1	103,92,127	37,39,88	119134126	6.23572e-11	4.65204e-09	0.0194174757282,0.0217391304348,0.00787401574803	0.310924369748,0.291044776119,0.698412698413	-0.417117	0.0525373
Chr1_21355804_21356106	AT1G57660	+	Chr1	21355804	21356106	FALSE	U	9,10,12	823485798	114116139	860792993	270	135	0	0	0.005,0.01,0.007	0.062,0.068,0.065	-0.058	15,20,22	14558501463	162182202	159514941826	1.63807e-38	1.77753e-35	0.0103092783505,0.0235294117647,0.015037593985	0.101567398119,0.121820615797,0.110624315444	-0.0950453	0.0163636
Chr1_21754089_21758508	AT1G58602	+	Chr1	21754089	21758508	FALSE	U	41,32,54	47,11,52	109103111	10,20,9	270	135	1.48705e-08	7.65475e-07	0.304,0.593,0.342	0.845,0.72,0.86	-0.395	175109189	592245427484	471405496	553346454658	3.95751e-30	2.40197e-27	0.0295508274232,0.0239982386614,0.0252538749332	0.0851256099765,0.0871905274489,0.1064834693	-0.0666656	0.0801562
Chr1_2182717_2182810	AT1G07110	-	Chr1	2182717	2182810	FALSE	U	2,6,5	224282309	119111104	293307289	270	135	0	0	0.004,0.011,0.008	0.169,0.153,0.152	-0.15	2,6,5	174198251	119111104	247266249	1.49057e-48	2.8093e-45	0.0114942528736,0.030303030303,0.0199203187251	0.481781376518,0.417293233083,0.417670682731	-0.418343	0.015
Chr1_22371393_22371756	AT1G60780	-	Chr1	22371393	22371756	FALSE	U	1,2,3	182144192	47,65,54	122,121,99	270	135	0	0	0.003,0.007,0.008	0.162,0.212,0.214	-0.19	2,3,5	434337483	99116108	359396409	4.40828e-64	2.87015e-60	0.00460829493088,0.00890207715134,0.0103519668737	0.275766016713,0.292929292929,0.264058679707	-0.269631	0.01
Chr1_2287228_2287299	AT1G07440	-	Chr1	2287228	2287299	FALSE	U	10,1,7	238169231	149169163	251338276	270	135	0	0	0.021,0.003,0.015	0.229,0.2,0.228	-0.206	10,1,7	108,88,110	149169163	123165141	1.7134e-55	5.3353e-52	0.0925925925926,0.0113636363636,0.0636363636364	1,1,1	-0.944136	0.0125
Chr1_23250653_23250740	AT1G62780	-	Chr1	23250653	23250740	FALSE	U	53,29,34	680404614	130193204	558665547	270	135	0	0	0.038,0.035,0.027	0.104,0.127,0.157	-0.096	53,29,34	367227349	130193204	357381359	3.51671e-12	3.14829e-10	0.144414168937,0.127753303965,0.0974212034384	0.364145658263,0.50656167979,0.568245125348	-0.356455	0.0497087
Chr1_23525129_23525236	AT1G63430	+	Chr1	23525129	23525236	FALSE	U	2,0,2	37,37,51	67,71,63	36,47,34	270	135	0	0	0.026,0.0,0.019	0.482,0.43,0.481	-0.449	2,0,2	25,26,30	67,71,63	41,45,41	2.02337e-29	1.15009e-26	0.08,0.0,0.0666666666667	1,1,1	-0.951111	0.0246988
Chr1_23625713_23625795	AT1G63700	-	Chr1	23625713	23625795	FALSE	U	0,0,2	50,57,67	25,43,31	53,43,51	270	135	0	0	0.0,0.0,0.015	0.191,0.333,0.233	-0.247	0,0,2	28,29,31	25,43,31	38,39,38	8.09242e-15	1.07928e-12	0.0,0.0,0.0645161290323	0.657894736842,1,0.815789473684	-0.803056	0.0418898
Chr1_23790388_23790484	AT1G64090	+	Chr1	23790388	23790484	FALSE	U	1,3,4	190144252	44,45,57	160158182	270	135	0	0	0.003,0.01,0.008	0.121,0.125,0.135	-0.12	1,3,4	96,77,121	44,45,57	93,93,99	4.36608e-27	2.04376e-24	0.0104166666667,0.038961038961,0.0330578512397	0.47311827957,0.483870967742,0.575757575758	-0.483437	0.0284946
Chr1_23811992_23812227	AT1G64150	-	Chr1	23811992	23812227	FALSE	U	0,0,0	108,89,121	13,28,26	105,113,87	270	135	0	0	0.0,0.0,0.0	0.058,0.11,0.13	-0.099	0,0,0	177142180	14,36,29	187178184	2.29644e-11	1.8254e-09	0.0,0.0,0.0	0.0748663101604,0.202247191011,0.157608695652	-0.144907	0.0523373
Chr1_23911527_23911723	AT1G64390	+	Chr1	23911527	23911723	FALSE	U	2,0,1	194,36,155	29,21,33	94183153	270	135	0	0	0.005,0.0,0.003	0.134,0.054,0.097	-0.092	3,1,1	276,76,241	40,26,41	162324243	9.46565e-08	3.52255e-06	0.0108695652174,0.0131578947368,0.00414937759336	0.246913580247,0.0802469135802,0.168724279835	-0.155903	0.0765
Chr1_24475532_24475616	AT1G65800	+	Chr1	24475532	24475616	TRUE	U	25,14,24	121,94,140	100111118	76,76,74	270	135	0	0	0.094,0.069,0.079	0.397,0.422,0.444	-0.34	25,14,24	60,39,58	100111118	54,66,59	3.86302e-26	1.66666e-23	0.416666666667,0.358974358974,0.413793103448	1,1,1	-0.603522	0.0287736
Chr1_24735604_24735678	AT1G66340	+	Chr1	24735604	24735678	FALSE	U	0,0,0	44,28,33	18,18,21	18,19,20	270	135	0	0	0.0,0.0,0.0	0.333,0.321,0.344	-0.333	0,0,0	17,16,19	18,18,21	18,21,19	8.92331e-15	1.17911e-12	0.0,0.0,0.0	1.0,0.857142857143,1	-0.952381	0.0434211
Chr1_24994501_24994585	AT1G66970	-	Chr1	24994501	24994585	FALSE	U	3,3,6	376165323	32,46,51	210239230	270	135	0	0	0.004,0.009,0.009	0.071,0.088,0.1	-0.079	3,3,6	216108177	32,46,51	132150147	1.23488e-21	3.56617e-19	0.0138888888889,0.0277777777778,0.0338983050847	0.242424242424,0.306666666667,0.34693877551	-0.273488	0.0331333
Chr1_2537110_2537329	AT1G08110	+	Chr1	2537110	2537329	FALSE	U	9,10,9	350335422	31,43,40	251294272	270	135	1.11022e-16	2.00623e-14	0.013,0.015,0.011	0.058,0.068,0.068	-0.052	10,14,10	582517670	39,48,42	414455415	1.82262e-15	2.64239e-13	0.0171821305842,0.027079303675,0.0149253731343	0.0942028985507,0.105494505495,0.101204819277	-0.0805718	0.0863208
Chr1_2537420_2537529	AT1G08110	+	Chr1	2537420	2537529	FALSE	U	9,19,20	456433520	131149122	317331317	270	135	0	0	0.01,0.021,0.019	0.171,0.184,0.161	-0.155	9,19,20	291258335	131149122	207227207	9.06334e-60	4.32738e-56	0.0309278350515,0.0736434108527,0.0597014925373	0.632850241546,0.656387665198,0.589371980676	-0.571446	0.02
Chr1_25435202_25435307	AT1G67840	+	Chr1	25435202	25435307	FALSE	U	3,0,4	79,91,120	63,55,80	77,84,65	270	135	0	0	0.019,0.0,0.016	0.29,0.247,0.381	-0.294	3,0,4	77,71,91	63,55,80	85,100,96	2.25467e-23	7.68939e-21	0.038961038961,0.0,0.043956043956	0.741176470588,0.55,0.833333333333	-0.680531	0.0308824
Chr1_25494837_25494907	AT1G68010	+	Chr1	25494837	25494907	FALSE	EI	37,9,35	266624693054	7371003829	305339113312	270	135	0	0	0.007,0.002,0.006	0.108,0.114,0.111	-0.106	37,9,35	8518571055	7371003829	114813921209	5.55279e-19	1.20147e-16	0.0434782608696,0.0105017502917,0.0331753554502	0.641986062718,0.720545977011,0.685690653433	-0.653689	0.0371277
Chr1_25957847_25958187	AT1G69040	+	Chr1	25957847	25958187	TRUE	U	8,5,13	53,58,56	54,70,65	40,42,34	270	135	0	0	0.07,0.041,0.104	0.403,0.455,0.489	-0.377	16,14,32	160213251	95141132	215273235	1.41692e-19	3.2735e-17	0.1,0.0657276995305,0.127490039841	0.441860465116,0.516483516484,0.56170212766	-0.408943	0.0374302
Chr1_26536518_26536603	AT1G70410	-	Chr1	26536518	26536603	TRUE	I	3,4,10	90,85,110	104,74,76	141119116	270	135	0	0	0.016,0.023,0.043	0.269,0.237,0.247	-0.224	3,4,10	252252301	104,74,76	393371360	5.78596e-24	2.05141e-21	0.0119047619048,0.015873015873,0.0332225913621	0.264631043257,0.199460916442,0.211111111111	-0.204734	0.0311111
Chr1_26629963_26630061	AT1G70620	+	Chr1	26629963	26630061	FALSE	U	2,1,2	240209266	30,26,24	148206179	270	135	0	0	0.004,0.002,0.004	0.092,0.059,0.063	-0.068	2,1,2	73,63,79	30,26,24	51,62,55	2.42061e-18	4.93907e-16	0.027397260274,0.015873015873,0.0253164556962	0.588235294118,0.41935483871,0.436363636364	-0.458456	0.0371845
Chr1_2668525_2668695	AT1G08450	-	Chr1	2668525	2668695	FALSE	U	4,0,6	125,88,146	24,40,29	91,82,70	270	135	0	0	0.016,0.0,0.02	0.117,0.196,0.172	-0.15	5,0,7	130107165	29,48,32	94,87,92	2.8087e-12	2.55274e-10	0.0384615384615,0.0,0.0424242424242	0.308510638298,0.551724137931,0.347826086957	-0.375725	0.0234177
Chr1_26863272_26863359	AT1G71260	-	Chr1	26863272	26863359	FALSE	U	8,7,3	72,44,51	74,70,54	71,64,71	270	135	0	0	0.053,0.074,0.029	0.343,0.354,0.276	-0.272	8,7,3	70,52,63	74,70,54	91,93,94	3.12269e-15	4.33419e-13	0.114285714286,0.134615384615,0.047619047619	0.813186813187,0.752688172043,0.574468085106	-0.614608	0.0429964
Chr1_2687595_2687703	AT1G08490	-	Chr1	2687595	2687703	FALSE	U	6,2,3	91,67,95	46,36,26	88,73,69	270	135	0	0	0.032,0.015,0.016	0.207,0.198,0.159	-0.167	6,2,3	81,68,92	46,36,26	85,90,88	1.6718e-10	1.14249e-08	0.0740740740741,0.0294117647059,0.0326086956522	0.541176470588,0.4,0.295454545455	-0.366845	0.0280612
Chr1_26984767_26984843	AT1G71720	+	Chr1	26984767	26984843	FALSE	U	12,4,4	128127154	41,43,47	121126114	270	135	0	0	0.045,0.016,0.013	0.145,0.146,0.171	-0.129	12,4,4	77,56,82	41,43,47	78,80,78	3.11908e-14	3.75438e-12	0.155844155844,0.0714285714286,0.0487804878049	0.525641025641,0.5375,0.602564102564	-0.463217	0.0474394
Chr1_27347857_27347960	AT1G72640	-	Chr1	27347857	27347960	FALSE	U	12,13,15	145166191	51,59,35	129128104	270	135	0	0	0.04,0.038,0.038	0.165,0.187,0.144	-0.127	12,13,15	135123147	51,59,35	128130119	1.73313e-09	9.51878e-08	0.0888888888889,0.105691056911,0.102040816327	0.3984375,0.453846153846,0.294117647059	-0.28326	0.0685071
Chr1_27374066_27374145	AT1G72710	+	Chr1	27374066	27374145	FALSE	U	0,0,0	217252275	30,20,30	238245229	270	135	0	0	0.0,0.0,0.0	0.059,0.039,0.061	-0.053	0,0,0	127138158	30,20,30	136142140	1.35068e-19	3.13057e-17	0.0,0.0,0.0	0.220588235294,0.140845070423,0.214285714286	-0.191906	0.0373545
Chr1_27374626_27374708	AT1G72710	+	Chr1	27374626	27374708	FALSE	U	4,14,12	251310319	63,73,58	229278263	270	135	0	0	0.008,0.022,0.018	0.121,0.116,0.099	-0.096	4,14,12	132143164	63,73,58	141147145	4.22843e-21	1.14278e-18	0.030303030303,0.0979020979021,0.0731707317073	0.446808510638,0.496598639456,0.4	-0.380677	0.0367665
Chr1_27480297_27480384	AT1G73060	+	Chr1	27480297	27480384	FALSE	U	2,6,3	325308344	36,78,40	208281249	270	135	0	0	0.003,0.01,0.004	0.08,0.122,0.074	-0.086	2,6,3	196156190	36,78,40	131174146	1.42128e-15	2.10626e-13	0.0102040816327,0.0384615384615,0.0157894736842	0.274809160305,0.448275862069,0.27397260274	-0.310868	0.0431599
Chr1_27496391_27496501	AT1G73110	-	Chr1	27496391	27496501	FALSE	E	11,17,10	146146216	111134132	147164174	270	135	0	0	0.036,0.055,0.023	0.274,0.29,0.275	-0.242	11,17,10	94,90,118	111134132	115128118	7.52903e-35	5.92551e-32	0.117021276596,0.188888888889,0.0847457627119	0.965217391304,1,1	-0.858187	0.0232895
Chr1_2764324_2764409	AT1G08680	+	Chr1	2764324	2764409	FALSE	U	0,0,0	31,41,51	37,44,39	40,39,33	270	135	0	0	0.0,0.0,0.0	0.316,0.361,0.371	-0.349	0,0,0	31,31,33	37,44,39	40,40,43	7.13906e-25	2.74888e-22	0.0,0.0,0.0	0.925,1,0.906976744186	-0.943992	0.0126667
Chr1_2766644_2766725	AT1G08680	+	Chr1	2766644	2766725	FALSE	EI	2,0,1	64,51,82	37,40,32	79,86,83	270	135	0	0	0.015,0.0,0.006	0.19,0.189,0.162	-0.173	2,0,1	30,30,31	37,40,32	38,38,41	2.84682e-18	5.74329e-16	0.0666666666667,0.0,0.0322580645161	0.973684210526,1,0.780487804878	-0.885082	0.0164706
Chr1_27688667_27688760	AT1G73650	-	Chr1	27688667	27688760	FALSE	U	3,0,2	93,91,137	74,71,57	126132110	270	135	0	0	0.016,0.0,0.007	0.227,0.212,0.206	-0.207	3,0,2	65,64,92	74,71,57	98,121,90	7.40586e-29	4.08e-26	0.0461538461538,0.0,0.0217391304348	0.755102040816,0.586776859504,0.633333333333	-0.635773	0.0286458
Chr1_27792816_27792914	AT1G73920	+	Chr1	27792816	27792914	FALSE	U	2,15,7	83,84,85	60,76,57	84,98,103	270	135	0	0	0.012,0.082,0.04	0.263,0.279,0.217	-0.208	2,15,7	73,92,92	60,76,57	88,108,98	3.96761e-14	4.73593e-12	0.027397260274,0.163043478261,0.0760869565217	0.681818181818,0.703703703704,0.581632653061	-0.566876	0.0479333
Chr1_27852519_27852597	AT1G74070	-	Chr1	27852519	27852597	FALSE	U	13,1,20	205111198	75112107	105154145	270	135	0	0	0.031,0.004,0.048	0.263,0.267,0.27	-0.239	13,1,20	117,69,113	75112107	91128115	8.58494e-10	5.05213e-08	0.111111111111,0.0144927536232,0.176991150442	0.824175824176,0.875,0.930434782609	-0.775672	0.0680861
Chr1_28119776_28119866	AT1G74850	-	Chr1	28119776	28119866	FALSE	U	0,0,1	97,80,129	27,30,16	106100112	270	135	0	0	0.0,0.0,0.004	0.113,0.13,0.067	-0.102	0,0,1	74,49,81	27,30,16	68,86,79	8.54827e-13	8.27323e-11	0.0,0.0,0.0123456790123	0.397058823529,0.348837209302,0.20253164557	-0.312027	0.0523599
Chr1_28579486_28579582	AT1G76160	-	Chr1	28579486	28579582	FALSE	U	6,11,8	130257234	102,47,48	445193224	270	135	0	0	0.023,0.021,0.017	0.103,0.109,0.097	-0.083	6,11,8	90167140	102,47,48	312130156	1.23589e-16	2.07291e-14	0.0666666666667,0.0658682634731,0.0571428571429	0.326923076923,0.361538461538,0.307692307692	-0.268825	0.0420553
Chr1_28685520_28685608	AT1G76450	+	Chr1	28685520	28685608	FALSE	U	1,0,5	402346379	45,42,42	329393366	270	135	0	0	0.001,0.0,0.007	0.064,0.051,0.054	-0.054	1,0,5	294246314	45,42,42	255290279	7.36429e-25	2.82044e-22	0.00340136054422,0.0,0.015923566879	0.176470588235,0.144827586207,0.150537634409	-0.150837	0.031338
Chr1_2874186_2874310	AT1G08930	+	Chr1	2874186	2874310	FALSE	U	0,0,0	92445237	178,46,71	1013202331	270	135	0	0	0.0,0.0,0.0	0.081,0.102,0.097	-0.093	0,0,0	105473256	178,46,71	1139256413	8.71325e-40	1.05768e-36	0.0,0.0,0.0	0.156277436348,0.1796875,0.17191283293	-0.169293	0.00941176
Chr1_2885534_2885613	AT1G08980	+	Chr1	2885534	2885613	FALSE	U	6,15,6	149269203	56,41,50	236190187	270	135	0	0	0.02,0.027,0.015	0.106,0.097,0.118	-0.086	6,15,6	125204164	56,41,50	175147160	8.7483e-17	1.51339e-14	0.048,0.0735294117647,0.0365853658537	0.32,0.278911564626,0.3125	-0.251099	0.0185
Chr1_29118073_29118211	AT1G77490	+	Chr1	29118073	29118211	FALSE	U	9,6,9	292190282	72,74,57	113165126	270	135	0	0	0.015,0.016,0.016	0.242,0.183,0.184	-0.187	9,6,9	284227327	72,74,57	146165146	2.70116e-41	3.65008e-38	0.0316901408451,0.0264317180617,0.0275229357798	0.493150684932,0.448484848485,0.390410958904	-0.415467	0.0175439
Chr1_29118695_29118797	AT1G77490	+	Chr1	29118695	29118797	FALSE	U	18,17,19	251209329	55,67,64	149170148	270	135	0	0	0.035,0.039,0.028	0.156,0.165,0.178	-0.132	18,17,19	210168242	55,67,64	108122108	3.81537e-26	1.65608e-23	0.0857142857143,0.10119047619,0.0785123966942	0.509259259259,0.549180327869,0.592592592593	-0.461872	0.029542
Chr1_29119588_29119714	AT1G77490	+	Chr1	29119588	29119714	FALSE	U	9,10,10	450413528	45,33,38	302292274	270	135	0	0	0.01,0.012,0.009	0.069,0.053,0.065	-0.052	9,10,10	259207299	45,33,38	133151133	5.37572e-17	9.55343e-15	0.034749034749,0.048309178744,0.0334448160535	0.338345864662,0.218543046358,0.285714285714	-0.242033	0.0413492
Chr1_29259057_29259141	AT1G77800	+	Chr1	29259057	29259141	FALSE	U	0,0,0	79,55,98	13,38,19	82,99,66	270	135	0	0	0.0,0.0,0.0	0.073,0.161,0.126	-0.12	0,0,0	41,30,51	13,38,19	43,54,50	1.92384e-10	1.29862e-08	0.0,0.0,0.0	0.302325581395,0.703703703704,0.38	-0.46201	0.0654815
Chr1_29420519_29420591	AT1G78200	+	Chr1	29420519	29420591	TRUE	U	16,24,7	24,42,32	97116133	28,34,25	270	135	0	0	0.25,0.222,0.099	0.634,0.63,0.727	-0.473	16,24,7	24,32,30	97116133	49,57,56	4.17426e-08	1.69189e-06	0.666666666667,0.75,0.233333333333	1,1,1	-0.45	0.0827255
Chr1_29591410_29591641	AT1G78670	+	Chr1	29591410	29591641	FALSE	U	4,1,3	102101139	55,36,58	92,86,85	270	135	0	0	0.019,0.005,0.011	0.23,0.173,0.254	-0.207	4,1,3	175152258	69,43,67	176178173	8.84741e-22	2.5969e-19	0.0228571428571,0.00657894736842,0.0116279069767	0.392045454545,0.241573033708,0.387283236994	-0.326613	0.0374118
Chr1_29594257_29594346	AT1G78680	+	Chr1	29594257	29594346	FALSE	U	19,4,29	200124239	115146192	88,115,79	270	135	0	0	0.045,0.016,0.057	0.395,0.388,0.549	-0.405	19,4,29	166100178	115146192	106132107	1.05696e-13	1.19965e-11	0.114457831325,0.04,0.162921348315	1,1,1	-0.894207	0.0511838
Chr1_29624034_29624124	AT1G78790	-	Chr1	29624034	29624124	FALSE	I	3,3,7	49,51,59	50,38,66	48,44,54	270	135	0	0	0.03,0.029,0.056	0.342,0.302,0.379	-0.303	3,3,7	14,18,20	50,38,66	20,15,17	2.17413e-13	2.32749e-11	0.214285714286,0.166666666667,0.35	1,1,1	-0.756349	0.052012
Chr1_29800926_29801288	AT1G79230	+	Chr1	29800926	29801288	FALSE	EI	6,3,9	225170258	57,64,42	135162181	270	135	0	0	0.013,0.009,0.017	0.174,0.165,0.104	-0.135	17,5,18	499343549	115128105	457471513	7.54095e-29	4.12271e-26	0.0340681362725,0.0145772594752,0.0327868852459	0.251641137856,0.271762208068,0.204678362573	-0.21555	0.0281982
Chr1_29931592_29931692	AT1G79560	+	Chr1	29931592	29931692	FALSE	U	1,0,0	124110123	17,21,17	111128110	270	135	6.66134e-14	8.51797e-12	0.004,0.0,0.0	0.071,0.076,0.072	-0.072	1,0,0	81,60,76	17,21,17	52,57,56	1.28082e-16	2.14324e-14	0.0123456790123,0.0,0.0	0.326923076923,0.368421052632,0.303571428571	-0.328857	0.099506
Chr1_30002525_30002607	AT1G79730	-	Chr1	30002525	30002607	FALSE	U	4,0,1	44,59,79	66,47,48	50,71,61	270	135	0	0	0.043,0.0,0.006	0.398,0.249,0.282	-0.293	4,0,1	32,30,39	66,47,48	41,45,42	1.00406e-18	2.14018e-16	0.125,0.0,0.025641025641	1,1,1	-0.949786	0.0392444
Chr1_30030483_30030577	AT1G79830	-	Chr1	30030483	30030577	FALSE	U	0,2,3	133123125	48,46,63	78,107,99	270	135	0	0	0.0,0.008,0.012	0.235,0.177,0.241	-0.211	0,2,3	84,66,86	48,46,63	65,80,78	1.5343e-28	8.20038e-26	0.0,0.030303030303,0.0348837209302	0.738461538462,0.575,0.807692307692	-0.685322	0.0282609
Chr1_30105959_30106062	AT1G80030	-	Chr1	30105959	30106062	FALSE	U	0,1,2	173122152	37,47,46	185270209	270	135	0	0	0.0,0.004,0.007	0.091,0.08,0.099	-0.086	0,1,2	102,79,107	37,47,46	132162136	1.20511e-20	3.0935e-18	0.0,0.0126582278481,0.018691588785	0.280303030303,0.29012345679,0.338235294118	-0.292437	0.0378061
Chr1_30229390_30229486	AT1G80410	-	Chr1	30229390	30229486	FALSE	U	1,1,0	93114130	48,46,54	130123152	270	135	0	0	0.005,0.004,0.0	0.156,0.158,0.151	-0.152	1,1,0	73,69,88	48,46,54	114105117	4.17828e-26	1.75879e-23	0.013698630137,0.0144927536232,0.0	0.421052631579,0.438095238095,0.461538461538	-0.430832	0.0313475
Chr1_30312552_30312631	AT1G80640	+	Chr1	30312552	30312631	FALSE	U	4,3,3	66,61,61	52,81,60	37,50,53	270	135	0	0	0.029,0.024,0.024	0.413,0.448,0.361	-0.382	4,3,3	33,30,38	52,81,60	42,45,48	3.44661e-19	7.68981e-17	0.121212121212,0.1,0.0789473684211	1,1,1	-0.899947	0.0390135
Chr1_3158594_3158663	AT1G09750	+	Chr1	3158594	3158663	FALSE	U	34,49,45	641540781	109,95,131	281318310	270	135	0	0	0.026,0.043,0.028	0.162,0.13,0.174	-0.123	34,49,45	302282405	109,95,131	155181179	8.25659e-20	1.94516e-17	0.112582781457,0.173758865248,0.111111111111	0.703225806452,0.524861878453,0.731843575419	-0.520826	0.0162963
Chr1_3161422_3161521	AT1G09760	-	Chr1	3161422	3161521	FALSE	U	0,0,0	108123114	23,53,42	112134115	270	135	0	0	0.0,0.0,0.0	0.093,0.165,0.154	-0.137	0,0,0	89,75,99	23,53,42	109110115	8.31218e-15	1.10447e-12	0.0,0.0,0.0	0.211009174312,0.481818181818,0.365217391304	-0.352682	0.0237179
Chr1_3259896_3260177	AT1G09980	-	Chr1	3259896	3260177	FALSE	U	0,0,1	36,21,43	14,20,24	19,37,19	270	135	0	0	0.0,0.0,0.011	0.269,0.213,0.387	-0.286	0,0,2	67,54,72	24,35,36	69,81,75	2.22641e-18	4.58198e-16	0.0,0.0,0.0277777777778	0.347826086957,0.432098765432,0.48	-0.410716	0.0179661
Chr1_3285341_3285424	AT1G10060	+	Chr1	3285341	3285424	FALSE	U	3,1,2	36,33,61	21,34,24	28,44,27	270	135	0	0	0.04,0.015,0.016	0.273,0.279,0.308	-0.263	3,1,2	32,27,50	21,34,24	27,36,29	3.0008e-16	4.86231e-14	0.09375,0.037037037037,0.04	0.777777777778,0.944444444444,0.827586206897	-0.793007	0.0225714
Chr1_3589075_3589192	AT1G10760	-	Chr1	3589075	3589192	FALSE	U	4,5,15	476367671	65,57,60	257310240	270	135	0	0	0.004,0.007,0.011	0.112,0.084,0.111	-0.095	4,5,15	586548785	65,57,60	390435385	3.47875e-32	2.46678e-29	0.00682593856655,0.00912408759124,0.0191082802548	0.166666666667,0.131034482759,0.155844155844	-0.139496	0.0126923
Chr1_3802259_3802344	AT1G11310	-	Chr1	3802259	3802344	FALSE	U	3,3,2	342301314	47,48,34	395315377	270	135	0	0	0.004,0.005,0.003	0.056,0.071,0.043	-0.053	3,3,2	166169165	47,48,34	217176180	3.43389e-19	7.68536e-17	0.0180722891566,0.0177514792899,0.0121212121212	0.216589861751,0.272727272727,0.188888888889	-0.210087	0.0187302
Chr1_4001453_4001797	AT1G11860	+	Chr1	4001453	4001797	FALSE	EI	32,7,41	166311291772	238277304	161118041789	270	135	0	0	0.01,0.003,0.011	0.069,0.071,0.078	-0.065	66,17,89	698148977008	511586665	707182617868	1.06569e-10	7.58685e-09	0.00945423291792,0.00347151317133,0.0126997716895	0.0722670060812,0.0709357220675,0.0845195729537	-0.0673656	0.0330137
Chr1_411254_411335	AT1G02160	+	Chr1	411254	411335	TRUE	U	45,23,45	155216197	106108100	132110121	270	135	0	0	0.127,0.051,0.103	0.286,0.329,0.292	-0.209	45,23,45	182155222	106108100	152144142	2.73389e-15	3.8543e-13	0.247252747253,0.148387096774,0.202702702703	0.697368421053,0.75,0.704225352113	-0.51775	0.0105556
Chr1_413004_413079	AT1G02170	+	Chr1	413004	413079	FALSE	U	9,11,2	70,89,104	43,55,55	98,68,80	270	135	0	0	0.06,0.058,0.01	0.18,0.288,0.256	-0.199	9,11,2	29,29,34	43,55,55	33,32,31	4.46441e-10	2.79735e-08	0.310344827586,0.379310344828,0.0588235294118	1,1,1	-0.750507	0.0152778
Chr1_4546541_4546643	AT1G13270	+	Chr1	4546541	4546643	TRUE	U	1,0,0	260216288	130134169	218222178	270	135	0	0	0.002,0.0,0.0	0.23,0.232,0.322	-0.261	1,0,0	154131165	130134169	170163158	1.27548e-56	4.15221e-53	0.00649350649351,0.0,0.0	0.764705882353,0.822085889571,1	-0.860099	0.01
Chr1_4875808_4875894	AT1G14270	-	Chr1	4875808	4875894	FALSE	U	0,2,1	255207258	73,77,85	251286254	270	135	0	0	0.0,0.005,0.002	0.127,0.119,0.143	-0.127	0,2,1	132105144	73,77,85	154173159	1.95554e-40	2.59359e-37	0.0,0.0190476190476,0.00694444444444	0.474025974026,0.445086705202,0.534591194969	-0.475904	0.0126316
Chr1_5052907_5052975	AT1G14690	-	Chr1	5052907	5052975	FALSE	U	0,0,0	42,42,50	19,25,26	59,49,57	270	135	0	0	0.0,0.0,0.0	0.139,0.203,0.186	-0.176	0,0,0	23,25,26	19,25,26	33,31,35	1.58531e-15	2.31711e-13	0.0,0.0,0.0	0.575757575758,0.806451612903,0.742857142857	-0.708355	0.0258427
Chr1_5068196_5068282	AT1G14720	-	Chr1	5068196	5068282	FALSE	U	4,4,0	115185187	83,39,71	183186199	270	135	0	0	0.017,0.011,0.0	0.185,0.095,0.151	-0.134	4,4,0	84127116	83,39,71	139116129	6.95176e-15	9.32355e-13	0.047619047619,0.0314960629921,0.0	0.597122302158,0.336206896552,0.550387596899	-0.468201	0.0283505
Chr1_5103773_5103873	AT1G14810	-	Chr1	5103773	5103873	FALSE	U	0,1,3	138,89,164	41,21,37	173144158	270	135	0	0	0.0,0.006,0.009	0.106,0.068,0.105	-0.088	0,1,3	125,88,143	41,21,37	148139154	1.4635e-13	1.62e-11	0.0,0.0113636363636,0.020979020979	0.277027027027,0.151079136691,0.24025974026	-0.212008	0.0296639
Chr1_514801_514891	AT1G02475	-	Chr1	514801	514891	FALSE	U	0,1,0	372274449	70,40,60	258313280	270	135	0	0	0.0,0.002,0.0	0.119,0.06,0.097	-0.091	0,1,0	144110173	70,40,60	111121123	3.73362e-24	1.36428e-21	0.0,0.00909090909091,0.0	0.630630630631,0.330578512397,0.487804878049	-0.479974	0.00933333
Chr1_5413517_5413593	AT1G15740	+	Chr1	5413517	5413593	FALSE	U	6,8,9	101170149	48,50,41	124136120	270	135	0	0	0.029,0.023,0.029	0.162,0.155,0.146	-0.127	6,8,9	47,70,59	48,50,41	55,54,58	3.6734e-16	5.92535e-14	0.127659574468,0.114285714286,0.152542372881	0.872727272727,0.925925925926,0.706896551724	-0.703687	0.0263218
Chr1_5495833_5495919	AT1G16010	-	Chr1	5495833	5495919	FALSE	U	7,8,6	84,71,104	45,49,68	71,94,77	270	135	0	0	0.04,0.053,0.028	0.241,0.207,0.306	-0.211	7,8,6	43,40,56	45,49,68	53,62,49	2.53723e-10	1.67633e-08	0.162790697674,0.2,0.107142857143	0.849056603774,0.790322580645,1	-0.723149	0.0369189
Chr1_5515551_5515647	AT1G16080	+	Chr1	5515551	5515647	FALSE	U	71,27,60	427363417	215247268	368411407	270	135	0	0	0.077,0.036,0.067	0.226,0.231,0.248	-0.175	71,27,60	258207266	215247268	257302246	1.78247e-10	1.21233e-08	0.27519379845,0.130434782609,0.225563909774	0.836575875486,0.817880794702,1	-0.674421	0.0369022
Chr1_5545016_5545218	AT1G16190	+	Chr1	5545016	5545218	FALSE	U	0,0,2	32,32,39	34,37,37	49,38,37	270	135	0	0	0.0,0.0,0.025	0.258,0.327,0.333	-0.298	0,0,2	55,41,57	39,43,46	80,67,79	5.52433e-20	1.32323e-17	0.0,0.0,0.0350877192982	0.4875,0.641791044776,0.582278481013	-0.558827	0.0218667
Chr1_5555315_5555508	AT1G16240	-	Chr1	5555315	5555508	FALSE	I	7,3,3	159170173	37,35,13	127108124	270	135	0	0	0.022,0.009,0.009	0.127,0.139,0.05	-0.092	10,4,3	195200216	44,41,17	148132141	6.97495e-06	0.00015975	0.0512820512821,0.02,0.0138888888889	0.297297297297,0.310606060606,0.120567375887	-0.214433	0.058232
Chr1_5776588_5776686	AT1G16890	-	Chr1	5776588	5776686	FALSE	U	5,6,4	142161225	80,42,45	124148160	270	135	0	0	0.017,0.018,0.009	0.244,0.124,0.123	-0.149	5,6,4	153148193	80,42,45	136147144	1.98163e-12	1.84315e-10	0.0326797385621,0.0405405405405,0.020725388601	0.588235294118,0.285714285714,0.3125	-0.364168	0.0354839
Chr1_5840912_5841328	AT1G17080	-	Chr1	5840912	5841328	FALSE	U	2,3,3	98113122	77,75,71	109,98,85	270	135	0	0	0.01,0.013,0.012	0.261,0.277,0.295	-0.266	2,4,9	394365463	146124147	373385372	1.67468e-58	7.1993e-55	0.00507614213198,0.0109589041096,0.0194384449244	0.391420911528,0.322077922078,0.395161290323	-0.357729	0.01
Chr1_5953111_5953202	AT1G17370	-	Chr1	5953111	5953202	FALSE	U	7,10,7	202173247	109115133	195216217	270	135	0	0	0.017,0.028,0.014	0.218,0.21,0.235	-0.201	7,10,7	100,76,117	109115133	120126122	2.81919e-39	3.25657e-36	0.07,0.131578947368,0.0598290598291	0.908333333333,0.912698412698,1	-0.853208	0.0132
Chr1_6004510_6004633	AT1G17470	+	Chr1	6004510	6004633	FALSE	U	2,3,5	149,99,151	25,42,25	101114116	270	135	0	0	0.007,0.015,0.016	0.11,0.156,0.097	-0.108	2,3,5	151111171	25,42,25	128150139	1.60191e-12	1.5056e-10	0.0132450331126,0.027027027027,0.0292397660819	0.1953125,0.28,0.179856115108	-0.195219	0.0364375
Chr1_6071383_6071499	AT1G17650	-	Chr1	6071383	6071499	FALSE	U	2,5,2	116,111,96	59,59,53	85,98,102	270	135	0	0	0.009,0.022,0.01	0.258,0.231,0.206	-0.218	2,5,2	96,81,95	59,59,53	88,104,98	2.75117e-27	1.30488e-24	0.0208333333333,0.0617283950617,0.0210526315789	0.670454545455,0.567307692308,0.540816326531	-0.558321	0.0166038
Chr1_6215154_6215238	AT1G18070	-	Chr1	6215154	6215238	FALSE	U	2,0,1	254226312	80,69,46	351314390	270	135	0	0	0.004,0.0,0.002	0.102,0.099,0.056	-0.084	2,0,1	127113165	80,69,46	171165183	1.02011e-18	2.16203e-16	0.0157480314961,0.0,0.00606060606061	0.46783625731,0.418181818182,0.251366120219	-0.371859	0.0261364
Chr1_6217186_6217293	AT1G18070	-	Chr1	6217186	6217293	FALSE	U	5,3,2	278202307	60,48,58	286295294	270	135	0	0	0.009,0.007,0.003	0.095,0.075,0.09	-0.08	5,3,2	161144209	60,48,58	218210233	3.968e-23	1.29764e-20	0.0310559006211,0.0208333333333,0.00956937799043	0.275229357798,0.228571428571,0.248927038627	-0.230423	0.0218182
Chr1_6424712_6424792	AT1G18660	+	Chr1	6424712	6424792	FALSE	U	1,3,1	159166195	71,80,77	225244234	270	135	0	0	0.003,0.009,0.003	0.136,0.141,0.141	-0.134	1,3,1	57,55,74	71,80,77	97,98,91	2.41518e-32	1.76503e-29	0.0175438596491,0.0545454545455,0.0135135135135	0.731958762887,0.816326530612,0.846153846154	-0.769612	0.014878
Chr1_6425273_6425345	AT1G18660	+	Chr1	6425273	6425345	FALSE	U	1,1,4	168162221	48,54,72	228233250	270	135	0	0	0.003,0.003,0.009	0.095,0.104,0.126	-0.103	1,1,4	52,49,66	48,54,72	88,88,82	8.59662e-16	1.31275e-13	0.0192307692308,0.0204081632653,0.0606060606061	0.545454545455,0.613636363636,0.878048780488	-0.645632	0.0286719
Chr1_66161_66261	AT1G01140	-	Chr1	66161	66261	FALSE	U	0,2,0	65140100	18,20,18	66,72,85	270	135	0	0	0.0,0.007,0.0	0.12,0.122,0.096	-0.11	0,2,0	56,114,94	18,20,18	71,70,75	6.45852e-15	8.71097e-13	0.0,0.0175438596491,0.0	0.253521126761,0.285714285714,0.24	-0.253897	0.0128571
Chr1_6732622_6732719	AT1G19450	-	Chr1	6732622	6732719	FALSE	U	1,0,0	23,73,72	41,31,26	100,115,85	270	135	0	0	0.021,0.0,0.0	0.17,0.119,0.133	-0.134	1,0,0	15,36,33	41,31,26	64,60,53	5.04862e-13	5.04996e-11	0.0666666666667,0.0,0.0	0.640625,0.516666666667,0.490566037736	-0.527064	0.0373373
Chr1_6732968_6733043	AT1G19450	-	Chr1	6732968	6733043	FALSE	U	0,0,0	13,45,47	20,49,25	53,59,49	270	135	0	0	0.0,0.0,0.0	0.159,0.293,0.203	-0.218	0,0,0	12,27,26	20,49,25	49,46,41	1.13379e-08	5.19854e-07	0.0,0.0,0.0	0.408163265306,1,0.609756097561	-0.67264	0.0478498
Chr1_6942956_6943227	AT1G20020	+	Chr1	6942956	6943227	TRUE	U	402511436	387439964649	544753644	231123072155	270	135	0	0	0.049,0.06,0.045	0.105,0.14,0.13	-0.074	601765735	659064277781	89612181037	422045224194	1.85252e-16	3.05001e-14	0.0911987860395,0.119029096001,0.0944608662126	0.212322274882,0.269349845201,0.247257987601	-0.141414	0.02896
Chr1_6972559_6972630	AT1G20110	+	Chr1	6972559	6972630	FALSE	U	15,28,18	139159178	65,84,66	97,122,95	270	135	0	0	0.051,0.081,0.048	0.251,0.256,0.258	-0.195	15,28,18	49,48,58	65,84,66	49,52,47	4.05522e-12	3.59889e-10	0.30612244898,0.583333333333,0.310344827586	1,1,1	-0.600066	0.0376804
Chr1_7114314_7114415	AT1G20540	+	Chr1	7114314	7114415	FALSE	U	0,0,0	56,58,68	38,27,20	52,67,65	270	135	0	0	0.0,0.0,0.0	0.268,0.168,0.133	-0.19	0,0,0	38,37,43	38,27,20	40,45,42	9.98874e-15	1.31263e-12	0.0,0.0,0.0	0.95,0.6,0.47619047619	-0.675397	0.0328188
Chr1_7252686_7252771	AT1G20850	+	Chr1	7252686	7252771	FALSE	U	2,2,0	206187251	31,21,29	127120120	270	135	0	0	0.005,0.005,0.0	0.109,0.08,0.108	-0.096	2,2,0	103,91,134	31,21,29	67,61,62	6.63042e-24	2.33923e-21	0.0194174757282,0.021978021978,0.0	0.462686567164,0.344262295082,0.467741935484	-0.411098	0.0228986
Chr1_7410217_7410310	AT1G21160	-	Chr1	7410217	7410310	FALSE	U	3,0,0	21,20,36	38,49,40	26,43,30	270	135	0	0	0.067,0.0,0.0	0.422,0.363,0.4	-0.373	3,0,0	20,13,22	38,49,40	30,31,30	4.7517e-19	1.04071e-16	0.15,0.0,0.0	1,1,1	-0.95	0.0288
Chr1_7650009_7650102	AT1G21760	+	Chr1	7650009	7650102	FALSE	U	0,0,0	68,50,78	38,29,32	73,52,48	270	135	0	0	0.0,0.0,0.0	0.207,0.218,0.25	-0.225	0,0,0	37,36,45	38,29,32	52,52,52	1.71293e-22	5.31075e-20	0.0,0.0,0.0	0.730769230769,0.557692307692,0.615384615385	-0.634615	0.0235802
Chr1_805071_805166	AT1G03280	+	Chr1	805071	805166	FALSE	U	1,4,9	40,22,44	64,58,61	13,16,15	270	135	0	0	0.012,0.083,0.093	0.711,0.644,0.67	-0.612	1,4,9	52,40,53	64,58,61	47,49,50	1.24854e-27	6.16682e-25	0.0192307692308,0.1,0.169811320755	1,1,1	-0.903653	0.01
Chr1_8336806_8337217	AT1G23490	+	Chr1	8336806	8337217	FALSE	U	0,3,3	266301301	35,42,42	293315319	270	135	0	0	0.0,0.005,0.005	0.056,0.063,0.062	-0.057	18,18,14	114612041410	101100119	126112371255	2.66546e-30	1.64567e-27	0.0157068062827,0.014950166113,0.00992907801418	0.0800951625694,0.0808407437348,0.0948207171315	-0.0717235	0.0168
Chr1_8337853_8337939	AT1G23490	+	Chr1	8337853	8337939	FALSE	U	21,20,19	729798899	143160128	770731748	270	135	0	0	0.014,0.012,0.01	0.085,0.099,0.079	-0.076	21,20,19	242254297	143160128	266261265	8.1912e-38	8.03624e-35	0.0867768595041,0.0787401574803,0.0639730639731	0.537593984962,0.613026819923,0.483018867925	-0.46805	0.0151351
Chr1_8421892_8421990	AT1G23820	+	Chr1	8421892	8421990	FALSE	U	9,6,4	407342428	62,45,79	408416404	270	135	0	0	0.011,0.009,0.005	0.071,0.051,0.089	-0.062	9,6,4	276222327	62,45,79	299312300	1.96887e-12	1.83366e-10	0.0326086956522,0.027027027027,0.0122324159021	0.207357859532,0.144230769231,0.263333333333	-0.181018	0.0372249
Chr1_8963189_8963267	AT1G25520	+	Chr1	8963189	8963267	FALSE	U	0,3,2	33,45,34	30,39,47	29,36,22	270	135	0	0	0.0,0.032,0.029	0.341,0.351,0.516	-0.382	0,3,2	19,22,28	30,39,47	28,31,25	4.22068e-14	5.02128e-12	0.0,0.136363636364,0.0714285714286	1,1,1	-0.930736	0.0375595
Chr1_9075036_9075104	AT1G26230	-	Chr1	9075036	9075104	FALSE	EI	7,8,3	30,33,39	43,73,67	30,46,30	270	135	0	0	0.104,0.108,0.037	0.417,0.442,0.528	-0.379	7,8,3	35,26,34	43,73,67	53,66,57	1.2861e-08	5.83339e-07	0.2,0.307692307692,0.0882352941176	0.811320754717,1,1	-0.738464	0.0512923
Chr1_9555536_9555622	AT1G27510	-	Chr1	9555536	9555622	FALSE	U	3,5,3	86106106	47,67,61	96,97,126	270	135	0	0	0.017,0.023,0.014	0.197,0.257,0.195	-0.198	3,5,3	56,64,70	47,67,61	89,84,89	4.63555e-18	9.07086e-16	0.0535714285714,0.078125,0.0428571428571	0.52808988764,0.797619047619,0.685393258427	-0.612183	0.0291935
Chr1_9557864_9557963	AT1G27510	-	Chr1	9557864	9557963	FALSE	U	3,3,4	57,60,86	32,43,42	90,72,68	270	135	0	0	0.026,0.024,0.023	0.151,0.23,0.236	-0.181	3,3,4	64,74,80	32,43,42	102,97,102	1.66275e-13	1.82926e-11	0.046875,0.0405405405405,0.05	0.313725490196,0.443298969072,0.411764705882	-0.343791	0.0371579
Chr1_9797165_9797256	AT1G28090	+	Chr1	9797165	9797256	FALSE	U	2,0,0	40,27,33	21,23,35	24,38,32	270	135	0	0	0.024,0.0,0.0	0.304,0.232,0.354	-0.289	2,0,0	22,18,22	21,23,35	31,33,36	6.2217e-12	5.40112e-10	0.0909090909091,0.0,0.0	0.677419354839,0.69696969697,0.972222222222	-0.751901	0.0390948
Chr1_9963969_9964063	AT1G28380	+	Chr1	9963969	9964063	FALSE	U	2,4,3	73,87,86	71,40,37	124,95,86	270	135	0	0	0.014,0.022,0.017	0.223,0.174,0.177	-0.174	2,4,3	47,73,58	71,40,37	106,90,73	2.69661e-14	3.2957e-12	0.0425531914894,0.0547945205479,0.051724137931	0.669811320755,0.444444444444,0.506849315068	-0.490678	0.0372159
Chr2_10142384_10142475	AT2G23820	+	Chr2	10142384	10142475	FALSE	U	1,0,2	98,94,108	22,32,27	112,78,84	270	135	0	0	0.005,0.0,0.009	0.089,0.17,0.138	-0.128	1,0,2	50,41,49	22,32,27	52,48,45	1.14233e-15	1.7218e-13	0.02,0.0,0.0408163265306	0.423076923077,0.666666666667,0.6	-0.542976	0.0496785
Chr2_10189543_10189623	AT2G23950	-	Chr2	10189543	10189623	FALSE	U	1,0,1	36,27,36	52,58,60	26,41,36	270	135	0	0	0.014,0.0,0.014	0.5,0.414,0.455	-0.447	1,0,1	17,9,19	52,58,60	21,29,25	2.76439e-25	1.0999e-22	0.0588235294118,0.0,0.0526315789474	1,1,1	-0.962848	0.0367089
Chr2_10230856_10230938	AT2G24060	+	Chr2	10230856	10230938	FALSE	U	12,26,12	256195284	92,141,93	207233227	270	135	0	0	0.023,0.063,0.021	0.182,0.232,0.17	-0.159	12,26,12	167121159	92,141,93	142148151	6.69769e-08	2.58449e-06	0.0718562874251,0.214876033058,0.0754716981132	0.647887323944,0.952702702703,0.615894039735	-0.618093	0.0976298
Chr2_10478443_10478533	AT2G24640	-	Chr2	10478443	10478533	FALSE	U	0,0,0	20,22,26	31,31,20	17,11,11	270	135	0	0	0.0,0.0,0.0	0.477,0.585,0.476	-0.513	0,0,0	12,11,14	31,31,20	20,20,21	1.03415e-13	1.17563e-11	0.0,0.0,0.0	1,1,0.952380952381	-0.984127	0.0570195
Chr2_11133453_11133644	AT2G26140	-	Chr2	11133453	11133644	FALSE	U	16,21,23	144100150	81,88,78	88,84,85	270	135	0	0	0.053,0.095,0.071	0.315,0.344,0.315	-0.252	18,23,29	228149255	101,107,91	211236212	6.91895e-22	2.04764e-19	0.0789473684211,0.154362416107,0.113725490196	0.478672985782,0.453389830508,0.429245283019	-0.338091	0.0370892
Chr2_11215830_11215918	AT2G26340	+	Chr2	11215830	11215918	FALSE	U	11,6,5	197162236	44,58,45	183205154	270	135	0	0	0.027,0.018,0.01	0.107,0.124,0.127	-0.101	11,6,5	101,93,118	44,58,45	101,102,99	6.70371e-16	1.04146e-13	0.108910891089,0.0645161290323,0.0423728813559	0.435643564356,0.56862745098,0.454545454545	-0.414339	0.0498387
Chr2_11276159_11276257	AT2G26510	+	Chr2	11276159	11276257	FALSE	U	0,0,0	80,56,66	22,28,24	57,61,82	270	135	0	0	0.0,0.0,0.0	0.162,0.187,0.128	-0.159	0,0,0	46,45,56	22,28,24	49,55,57	8.04826e-19	1.73096e-16	0.0,0.0,0.0	0.448979591837,0.509090909091,0.421052631579	-0.459708	0.0433209
Chr2_11422114_11422437	AT2G26780	+	Chr2	11422114	11422437	FALSE	U	3,1,0	32,19,41	39,50,46	31,44,32	270	135	0	0	0.045,0.026,0.0	0.386,0.362,0.418	-0.365	4,3,0	69,58,86	70,76,77	97,97,93	6.62194e-34	4.99218e-31	0.0579710144928,0.051724137931,0.0	0.721649484536,0.783505154639,0.827956989247	-0.741139	0.0283333
Chr2_11493344_11493420	AT2G26930	-	Chr2	11493344	11493420	FALSE	U	0,0,1	73,64,85	23,25,21	93,77,115	270	135	1.22125e-15	2.02775e-13	0.0,0.0,0.006	0.11,0.14,0.084	-0.109	0,0,1	75,59,73	23,25,21	73,77,76	6.42703e-16	1.00065e-13	0.0,0.0,0.013698630137	0.315068493151,0.324675324675,0.276315789474	-0.300787	0.0898706
Chr2_11538836_11538932	AT2G27040	-	Chr2	11538836	11538932	FALSE	U	0,4,1	47,29,52	27,30,33	42,57,42	270	135	0	0	0.0,0.065,0.01	0.243,0.208,0.282	-0.219	0,4,1	42,30,40	27,30,33	53,56,57	1.18663e-12	1.13314e-10	0.0,0.133333333333,0.025	0.509433962264,0.535714285714,0.578947368421	-0.488587	0.0633418
Chr2_11866216_11866316	AT2G27860	-	Chr2	11866216	11866316	FALSE	U	3,4,11	375318478	48,65,59	322322337	270	135	0	0	0.004,0.006,0.011	0.069,0.092,0.08	-0.073	3,4,11	316305398	48,65,59	284301292	6.92711e-27	3.15995e-24	0.00949367088608,0.0131147540984,0.0276381909548	0.169014084507,0.215946843854,0.202054794521	-0.178923	0.0341447
Chr2_12590133_12590227	AT2G29310	+	Chr2	12590133	12590227	FALSE	I	4,0,7	30,22,33	48,50,51	19,41,27	270	135	1.11022e-16	2.00623e-14	0.063,0.0,0.096	0.558,0.379,0.486	-0.421	4,0,7	152160159	48,50,51	152179176	1.7159e-23	5.87995e-21	0.0263157894737,0.0,0.0440251572327	0.315789473684,0.279329608939,0.289772727273	-0.271517	0.0574444
Chr2_12590133_12590232	AT2G29310	+	Chr2	12590133	12590232	FALSE	EI	3,0,7	144197164	40,42,46	152156157	270	135	0	0	0.01,0.0,0.021	0.116,0.119,0.128	-0.111	3,0,7	160168168	40,42,46	160189185	3.58456e-20	8.79187e-18	0.01875,0.0,0.0416666666667	0.25,0.222222222222,0.248648648649	-0.220151	0.0410843
Chr2_12592263_12592363	AT2G29320	+	Chr2	12592263	12592363	TRUE	U	12,4,5	44,26,53	69,74,90	52,46,68	270	135	0	0	0.12,0.071,0.045	0.399,0.446,0.398	-0.336	12,4,5	42,44,42	69,74,90	78,94,98	2.72306e-14	3.31672e-12	0.285714285714,0.0909090909091,0.119047619048	0.884615384615,0.787234042553,0.918367346939	-0.698182	0.0566856
Chr2_1261190_1261413	AT2G03980	+	Chr2	1261190	1261413	FALSE	U	3,0,0	29,42,69	22,24,17	36,38,44	270	135	1.11022e-16	2.00623e-14	0.049,0.0,0.0	0.234,0.24,0.162	-0.196	3,0,0	73,57,106	27,31,19	94,89,79	8.74863e-14	1.00734e-11	0.041095890411,0.0,0.0	0.287234042553,0.348314606742,0.240506329114	-0.27832	0.0988356
Chr2_12667900_12667980	AT2G29630	+	Chr2	12667900	12667980	FALSE	E	68,49,89	866713994	405468419	715726790	270	135	0	0	0.038,0.033,0.043	0.221,0.244,0.21	-0.187	68,49,89	614514730	405468419	581686633	1.01733e-100	2.42868e-96	0.110749185668,0.0953307392996,0.121917808219	0.697074010327,0.68221574344,0.661927330174	-0.571073	0.01125
Chr2_13183083_13183157	AT2G30980	-	Chr2	13183083	13183157	FALSE	U	4,0,5	161149197	25,36,28	134159147	270	135	0	0	0.012,0.0,0.013	0.085,0.102,0.087	-0.083	4,0,5	90,85,111	25,36,28	86,80,82	2.46326e-14	3.05748e-12	0.0444444444444,0.0,0.045045045045	0.290697674419,0.45,0.341463414634	-0.330891	0.0568644
Chr2_13420460_13420606	AT2G31510	-	Chr2	13420460	13420606	FALSE	U	0,1,3	61,87,117	24,31,15	59,77,78	270	135	0	0	0.0,0.006,0.013	0.169,0.168,0.088	-0.135	0,1,3	76,78,98	24,31,15	82,91,84	1.35312e-10	9.43616e-09	0.0,0.0128205128205,0.030612244898	0.292682926829,0.340659340659,0.178571428571	-0.25616	0.0761472
Chr2_13521179_13521460	AT2G31800	-	Chr2	13521179	13521460	FALSE	U	11,14,4	165243169	53,80,56	174138164	270	135	0	0	0.032,0.028,0.012	0.132,0.225,0.146	-0.144	14,24,6	192316246	89,119,86	247172210	2.41566e-09	1.29206e-07	0.0729166666667,0.0759493670886,0.0243902439024	0.36032388664,0.691860465116,0.409523809524	-0.429484	0.0852952
Chr2_13521822_13521922	AT2G31800	-	Chr2	13521822	13521922	FALSE	U	4,4,4	106138133	33,32,26	99,91,102	270	135	0	0	0.019,0.014,0.015	0.143,0.15,0.113	-0.119	4,4,4	68,113,88	33,32,26	88,61,75	7.54118e-14	8.75351e-12	0.0588235294118,0.0353982300885,0.0454545454545	0.375,0.524590163934,0.346666666667	-0.36886	0.0594309
Chr2_13524519_13524595	AT2G31810	+	Chr2	13524519	13524595	FALSE	I	11,18,5	292595358	136,71,95	304206253	270	135	0	0	0.018,0.015,0.007	0.183,0.147,0.158	-0.149	11,18,5	84182107	136,71,95	110,70,85	4.65912e-45	7.58366e-42	0.130952380952,0.0989010989011,0.0467289719626	1,1,1	-0.907806	0.0185937
Chr2_13643192_13643266	AT2G32080	-	Chr2	13643192	13643266	FALSE	I	2,0,5	59,54,74	29,34,40	37,37,45	270	135	0	0	0.017,0.0,0.033	0.282,0.315,0.308	-0.285	2,0,5	89,87,110	29,34,40	68,75,72	7.44974e-23	2.3713e-20	0.0224719101124,0.0,0.0454545454545	0.426470588235,0.453333333333,0.555555555556	-0.455811	0.0375234
Chr2_13643192_13643269	AT2G32080	-	Chr2	13643192	13643269	FALSE	EI	2,0,5	128114183	29,35,40	94,96,103	270	135	0	0	0.008,0.0,0.013	0.134,0.154,0.163	-0.143	2,0,5	93,91,115	29,35,40	71,78,75	3.42309e-23	1.12458e-20	0.0215053763441,0.0,0.0434782608696	0.408450704225,0.448717948718,0.533333333333	-0.441839	0.0370142
Chr2_13680340_13680430	AT2G32230	-	Chr2	13680340	13680430	FALSE	U	3,3,8	369246350	75,73,76	227324308	270	135	0	0	0.004,0.006,0.011	0.142,0.101,0.11	-0.111	3,3,8	133,78,123	75,73,76	90126110	7.46173e-28	3.76339e-25	0.0225563909774,0.0384615384615,0.0650406504065	0.833333333333,0.579365079365,0.690909090909	-0.659183	0.0333113
Chr2_13870744_13870825	AT2G32700	+	Chr2	13870744	13870825	FALSE	U	10,19,15	97120176	96,87,105	132105147	270	135	0	0	0.049,0.073,0.041	0.267,0.293,0.263	-0.22	10,19,15	63,57,76	96,87,105	72,73,72	7.13363e-25	2.74888e-22	0.15873015873,0.333333333333,0.197368421053	1,1,1	-0.770189	0.0371271
Chr2_14663361_14663452	AT2G34750	-	Chr2	14663361	14663452	FALSE	U	0,0,0	107137159	42,26,38	140104118	270	135	0	0	0.0,0.0,0.0	0.13,0.111,0.139	-0.127	0,0,0	60,63,83	42,26,38	86,63,82	2.15211e-25	8.65911e-23	0.0,0.0,0.0	0.488372093023,0.412698412698,0.463414634146	-0.454828	0.0373714
Chr2_14915712_14915799	AT2G35500	+	Chr2	14915712	14915799	FALSE	U	2,3,0	245218279	41,49,55	272267315	270	135	0	0	0.004,0.007,0.0	0.07,0.084,0.08	-0.074	2,3,0	74,57,84	41,49,55	90,99,96	8.76413e-23	2.7651e-20	0.027027027027,0.0526315789474,0.0	0.455555555556,0.494949494949,0.572916666667	-0.481254	0.0380734
Chr2_14976461_14976539	AT2G35630	+	Chr2	14976461	14976539	FALSE	U	0,0,1	92103105	27,16,22	111109117	270	135	1.88738e-15	3.02962e-13	0.0,0.0,0.005	0.108,0.068,0.086	-0.086	0,0,1	31,29,38	27,16,22	35,32,35	5.0848e-15	6.89713e-13	0.0,0.0,0.0263157894737	0.771428571429,0.5,0.628571428571	-0.624561	0.0985026
Chr2_15268124_15268241	AT2G36390	+	Chr2	15268124	15268241	FALSE	U	0,0,1	282176279	28,36,53	93,107,82	270	135	0	0	0.0,0.0,0.002	0.131,0.144,0.244	-0.172	0,0,1	299219319	28,36,53	104113106	6.4875e-30	3.8719e-27	0.0,0.0,0.00313479623824	0.269230769231,0.318584070796,0.5	-0.36156	0.0313433
Chr2_15268353_15268469	AT2G36390	+	Chr2	15268353	15268469	FALSE	U	2,0,2	441361501	29,28,29	170179158	270	135	0	0	0.002,0.0,0.002	0.079,0.073,0.084	-0.077	2,0,2	296217317	29,28,29	103112105	4.73027e-35	3.80648e-32	0.00675675675676,0.0,0.00630914826498	0.281553398058,0.25,0.27619047619	-0.264893	0.0291346
Chr2_15464390_15464736	AT2G36850	-	Chr2	15464390	15464736	FALSE	U	0,0,0	59,53,76	15,18,16	61,39,43	270	135	1.11022e-16	2.00623e-14	0.0,0.0,0.0	0.109,0.188,0.157	-0.151	0,0,0	172163204	25,29,27	195188180	3.05922e-21	8.45939e-19	0.0,0.0,0.0	0.128205128205,0.154255319149,0.15	-0.144153	0.0644836
Chr2_15538689_15538768	AT2G36990	-	Chr2	15538689	15538768	FALSE	U	4,3,18	364347457	157226187	463476444	270	135	0	0	0.005,0.004,0.019	0.145,0.192,0.174	-0.161	4,3,18	135126175	157226187	186202201	7.33185e-16	1.13168e-13	0.0296296296296,0.0238095238095,0.102857142857	0.844086021505,1,0.930348258706	-0.872713	0.0521687
Chr2_155453_155620	AT2G01320	-	Chr2	155453	155620	TRUE	U	8,18,11	78,67,86	69,77,89	65,81,72	270	135	0	0	0.049,0.118,0.06	0.347,0.322,0.382	-0.275	11,18,12	126114133	74,85,94	161175158	5.06587e-17	9.02519e-15	0.0873015873016,0.157894736842,0.0902255639098	0.459627329193,0.485714285714,0.594936708861	-0.401619	0.0430038
Chr2_15742343_15742420	AT2G37500	-	Chr2	15742343	15742420	FALSE	I	4,0,2	73,61,90	26,23,24	62,54,62	270	135	0	0	0.027,0.0,0.011	0.173,0.176,0.162	-0.158	4,0,2	42,33,49	26,23,24	40,46,45	7.70109e-12	6.5582e-10	0.0952380952381,0.0,0.0408163265306	0.65,0.5,0.533333333333	-0.51576	0.0711521
Chr2_15753167_15753702	AT2G37540	-	Chr2	15753167	15753702	FALSE	U	2,6,4	83243118	70,35,34	216152176	270	135	0	0	0.012,0.012,0.017	0.139,0.103,0.088	-0.096	5,11,10	299544381	126,73,79	758476468	1.39816e-27	6.85855e-25	0.0167224080268,0.0202205882353,0.0262467191601	0.166226912929,0.153361344538,0.168803418803	-0.141734	0.0351299
Chr2_16077254_16077853	AT2G38380	+	Chr2	16077254	16077853	FALSE	U	10,2,10	162,91,132	26,33,33	79,76,109	270	135	9.21485e-15	1.33054e-12	0.03,0.011,0.036	0.141,0.178,0.131	-0.124	20,5,18	462217411	54,65,66	282242336	8.31843e-17	1.44601e-14	0.04329004329,0.0230414746544,0.043795620438	0.191489361702,0.268595041322,0.196428571429	-0.182129	0.0914754
Chr2_16165172_16165251	AT2G38650	-	Chr2	16165172	16165251	FALSE	U	8,1,4	137126155	29,33,33	94,92,113	270	135	0	0	0.028,0.004,0.013	0.134,0.152,0.127	-0.123	8,1,4	46,32,56	29,33,33	51,51,50	1.16417e-11	9.67249e-10	0.173913043478,0.03125,0.0714285714286	0.56862745098,0.647058823529,0.66	-0.533032	0.0724888
Chr2_16350468_16350875	AT2G39190	+	Chr2	16350468	16350875	FALSE	U	3,5,3	130128138	32,25,47	51,94,73	270	135	0	0	0.011,0.019,0.011	0.239,0.117,0.244	-0.186	7,12,15	382366445	82,49,96	348370348	1.204e-10	8.51228e-09	0.0183246073298,0.0327868852459,0.0337078651685	0.235632183908,0.132432432432,0.275862068966	-0.186369	0.0773814
Chr2_16601867_16601946	AT2G39800	-	Chr2	16601867	16601946	FALSE	U	2,5,4	403521568	228268249	580901823	270	135	0	0	0.002,0.005,0.004	0.164,0.129,0.131	-0.138	2,5,4	202231239	228268249	333477442	2.99211e-62	1.53066e-58	0.00990099009901,0.021645021645,0.0167364016736	0.684684684685,0.561844863732,0.56334841629	-0.587199	0.0132143
Chr2_16874872_16874940	AT2G40410	+	Chr2	16874872	16874940	FALSE	U	11,14,14	104104113	65,73,40	67,89,57	270	135	0	0	0.05,0.063,0.058	0.327,0.291,0.26	-0.236	11,14,14	28,30,36	65,73,40	27,29,26	2.88629e-12	2.61994e-10	0.392857142857,0.466666666667,0.388888888889	1,1,1	-0.583862	0.0697442
Chr2_17046108_17046207	AT2G40840	+	Chr2	17046108	17046207	FALSE	U	3,0,5	256246318	133138180	224246201	270	135	0	0	0.006,0.0,0.008	0.229,0.219,0.309	-0.248	3,0,5	209184247	133138180	218229231	4.5572e-57	1.63191e-53	0.0143540669856,0.0,0.0202429149798	0.610091743119,0.602620087336,0.779220779221	-0.652445	0.0152632
Chr2_18130595_18130679	AT2G43750	-	Chr2	18130595	18130679	FALSE	U	0,0,1	646571746	92,49,73	572609641	270	135	0	0	0.0,0.0,0.001	0.074,0.039,0.054	-0.055	0,0,1	315261377	92,49,73	292311317	3.16625e-24	1.16289e-21	0.0,0.0,0.0026525198939	0.315068493151,0.157556270096,0.230283911672	-0.233419	0.0373892
Chr2_18263666_18263744	AT2G44160	+	Chr2	18263666	18263744	FALSE	U	16,24,22	140114135	106,91,115	158177172	270	135	1.11022e-16	2.00623e-14	0.054,0.095,0.075	0.251,0.204,0.251	-0.161	16,24,22	105,83,110	106,91,115	145136149	1.1229e-16	1.88782e-14	0.152380952381,0.289156626506,0.2	0.731034482759,0.669117647059,0.771812080537	-0.510142	0.08
Chr2_18638399_18638866	AT2G45200	-	Chr2	18638399	18638866	FALSE	U	22,12,11	65,66,83	63,72,80	49,49,52	270	135	0	0	0.145,0.083,0.062	0.391,0.424,0.435	-0.32	51,17,35	219176226	134167174	214242241	2.25924e-10	1.50797e-08	0.232876712329,0.0965909090909,0.154867256637	0.626168224299,0.690082644628,0.721991701245	-0.517969	0.0798625
Chr2_18920865_18920942	AT2G45990	+	Chr2	18920865	18920942	FALSE	U	6,10,15	124168198	60,62,62	183129189	270	135	0	0	0.024,0.029,0.036	0.141,0.194,0.141	-0.129	6,10,15	102101137	60,62,62	113108112	3.04421e-21	8.45053e-19	0.0588235294118,0.0990099009901,0.109489051095	0.530973451327,0.574074074074,0.553571428571	-0.463765	0.0415139
Chr2_1933918_1933982	AT2G05310	-	Chr2	1933918	1933982	FALSE	U	96,59,85	710787889	398456412	488520437	270	135	0	0	0.063,0.036,0.046	0.29,0.305,0.32	-0.257	96,59,85	351315428	398456412	273300275	2.28145e-80	3.2679e-76	0.273504273504,0.187301587302,0.198598130841	1,1,1	-0.780199	0.00923077
Chr2_19442885_19442985	AT2G47390	-	Chr2	19442885	19442985	FALSE	U	5,11,10	451381507	49,111,88	395455409	270	135	0	0	0.006,0.014,0.01	0.058,0.109,0.097	-0.078	5,11,10	215171245	49,111,88	198219203	3.65572e-11	2.81829e-09	0.0232558139535,0.0643274853801,0.0408163265306	0.247474747475,0.506849315068,0.433497536946	-0.353141	0.0764392
Chr2_2234937_2235018	AT2G05840	+	Chr2	2234937	2235018	FALSE	U	8,10,3	193155225	97107111	148123136	270	135	0	0	0.02,0.031,0.007	0.247,0.303,0.29	-0.261	8,10,3	85,65,96	97107111	72,70,83	1.16422e-45	1.98525e-42	0.0941176470588,0.153846153846,0.03125	1,1,1	-0.906929	0.0169231
Chr2_266938_267034	AT2G01590	+	Chr2	266938	267034	FALSE	U	24,18,25	351292408	95136122	261266240	270	135	0	0	0.033,0.03,0.03	0.154,0.204,0.203	-0.156	24,18,25	113101139	95136122	87,98,90	1.10643e-31	7.49606e-29	0.212389380531,0.178217821782,0.179856115108	1,1,1	-0.809846	0.0275556
Chr2_283767_283841	AT2G01640	+	Chr2	283767	283841	FALSE	U	0,0,3	31,34,33	20,46,35	19,29,40	270	135	0	0	0.0,0.0,0.043	0.345,0.442,0.304	-0.349	0,0,3	13,11,13	20,46,35	13,10,16	4.20703e-08	1.70324e-06	0.0,0.0,0.230769230769	1,1,1	-0.923077	0.0862949
Chr2_3049402_3049847	AT2G07360	-	Chr2	3049402	3049847	FALSE	U	1,0,0	105125108	29,42,28	106117109	270	135	0	0	0.005,0.0,0.0	0.12,0.152,0.114	-0.127	2,2,6	261247273	55,61,57	275274277	1.19969e-29	7.10088e-27	0.00766283524904,0.0080971659919,0.021978021978	0.2,0.222627737226,0.205776173285	-0.196889	0.0284821
Chr2_561470_561558	AT2G02180	+	Chr2	561470	561558	FALSE	U	4,7,6	131117152	58,30,42	128,105,94	270	135	0	0	0.015,0.029,0.019	0.185,0.125,0.183	-0.143	4,7,6	50,58,64	58,30,42	59,50,51	2.49759e-15	3.56325e-13	0.08,0.120689655172,0.09375	0.983050847458,0.6,0.823529411765	-0.704047	0.0476351
Chr2_6214372_6214455	AT2G14560	+	Chr2	6214372	6214455	FALSE	U	15,3,26	292,42,277	29,59,40	78,96,72	270	135	0	0	0.025,0.034,0.045	0.157,0.235,0.217	-0.168	15,3,26	98,13,92	29,59,40	23,31,27	1.18516e-14	1.54609e-12	0.15306122449,0.230769230769,0.282608695652	1,1,1	-0.777854	0.0508777
Chr2_6314324_6314402	AT2G14750	+	Chr2	6314324	6314402	FALSE	U	2,2,1	244121317	39,50,62	189245275	270	135	0	0	0.004,0.008,0.002	0.094,0.093,0.101	-0.091	2,2,1	101,63,139	39,50,62	98128126	4.19936e-26	1.75879e-23	0.019801980198,0.031746031746,0.00719424460432	0.397959183673,0.390625,0.492063492063	-0.407302	0.0330405
Chr2_759305_759377	AT2G02710	-	Chr2	759305	759377	TRUE	U	13,26,21	97332247	67,66,98	193129163	270	135	0	0	0.063,0.038,0.041	0.148,0.204,0.231	-0.147	13,26,21	33,106,83	67,66,98	77,48,71	5.55268e-10	3.39315e-08	0.393939393939,0.245283018868,0.253012048193	0.87012987013,1,1	-0.659298	0.0720909
Chr2_8185064_8185150	AT2G18890	+	Chr2	8185064	8185150	FALSE	U	0,0,0	12,24,30	28,25,29	33,18,26	270	135	0	0	0.0,0.0,0.0	0.298,0.41,0.358	-0.355	0,0,0	15,18,19	28,25,29	27,19,25	1.49894e-17	2.82507e-15	0.0,0.0,0.0	1,1,1	-1	0.0431734
Chr2_829600_829727	AT2G02860	-	Chr2	829600	829727	FALSE	U	1,4,1	16,41,31	62,42,52	63,32,41	270	135	0	0	0.03,0.047,0.016	0.33,0.396,0.388	-0.34	1,4,1	26,29,30	62,42,52	69,44,49	2.94046e-17	5.37226e-15	0.0384615384615,0.137931034483,0.0333333333333	0.898550724638,0.954545454545,1	-0.881123	0.0431679
Chr2_8528159_8528260	AT2G19790	+	Chr2	8528159	8528260	FALSE	U	15,11,18	238256352	92,84,88	164161195	270	135	0	0	0.031,0.021,0.025	0.219,0.207,0.184	-0.178	15,11,18	139147182	92,84,88	114103120	2.71795e-35	2.23744e-32	0.107913669065,0.0748299319728,0.0989010989011	0.80701754386,0.815533980583,0.733333333333	-0.691413	0.0264286
Chr2_8559059_8559314	AT2G19830	-	Chr2	8559059	8559314	FALSE	E	11,5,13	188199238	44,42,41	162129168	270	135	0	0	0.028,0.012,0.027	0.12,0.14,0.109	-0.101	17,13,18	367307470	68,73,62	310263283	1.31245e-19	3.05183e-17	0.0463215258856,0.042345276873,0.0382978723404	0.21935483871,0.277566539924,0.219081272085	-0.196346	0.039234
Chr2_8652265_8652357	AT2G20050	-	Chr2	8652265	8652357	FALSE	U	1,2,1	53,60,49	20,44,34	79,64,54	270	135	0	0	0.009,0.016,0.01	0.112,0.256,0.239	-0.191	1,2,1	46,56,61	20,44,34	75,69,71	2.05602e-09	1.11468e-07	0.0217391304348,0.0357142857143,0.016393442623	0.266666666667,0.63768115942,0.478873239437	-0.436458	0.0772561
Chr2_8722484_8722570	AT2G20210	-	Chr2	8722484	8722570	FALSE	U	0,0,0	7,11,12	27,50,38	6,9,10	270	135	0	0	0.0,0.0,0.0	0.692,0.735,0.655	-0.694	0,0,0	5,5,3	27,50,38	11,10,12	6.97952e-12	5.9936e-10	0.0,0.0,0.0	1,1,1	-1	0.0630711
Chr2_8964880_8964977	AT2G20820	+	Chr2	8964880	8964977	FALSE	I	4,6,12	489366566	110,92,125	436455495	270	135	0	0	0.004,0.008,0.01	0.112,0.092,0.112	-0.098	4,6,12	256172277	110,92,125	207217239	1.3831e-42	2.02155e-39	0.015625,0.0348837209302,0.043321299639	0.531400966184,0.423963133641,0.523012552301	-0.461516	0.0186885
Chr2_9016331_9016641	AT2G20990	+	Chr2	9016331	9016641	FALSE	EI	7,3,3	316328469	67,95,84	320331358	270	135	0	0	0.011,0.005,0.003	0.095,0.125,0.105	-0.102	12,6,5	8637701118	104135145	954921976	1.9466e-30	1.21229e-27	0.0139049826188,0.00779220779221,0.00447227191413	0.109014675052,0.14657980456,0.14856557377	-0.125997	0.0285088
Chr2_9111051_9111146	AT2G21280	-	Chr2	9111051	9111146	FALSE	U	19,3,6	221199225	115144124	250224250	270	135	0	0	0.041,0.007,0.013	0.187,0.243,0.199	-0.189	19,3,6	135108139	115144124	167181174	1.41907e-09	7.94622e-08	0.140740740741,0.0277777777778,0.0431654676259	0.688622754491,0.795580110497,0.712643678161	-0.661721	0.077169
Chr2_9217827_9217914	AT2G21520	+	Chr2	9217827	9217914	FALSE	U	7,10,8	140149173	147145140	157120123	270	135	0	0	0.024,0.032,0.023	0.319,0.377,0.363	-0.327	7,10,8	63,74,83	147145140	102,90,86	3.26419e-53	8.99146e-50	0.111111111111,0.135135135135,0.0963855421687	1,1,1	-0.885789	0.01525
Chr2_9582278_9582388	AT2G22540	+	Chr2	9582278	9582388	FALSE	U	4,0,0	156172246	35,34,44	180159196	270	135	0	0	0.013,0.0,0.0	0.089,0.097,0.101	-0.091	4,0,0	122125171	35,34,44	122131141	1.01071e-23	3.52953e-21	0.0327868852459,0.0,0.0	0.286885245902,0.259541984733,0.312056737589	-0.275232	0.037341
Chr2_9779157_9779238	AT2G22980	+	Chr2	9779157	9779238	FALSE	U	1,4,5	181186231	41,51,35	94,116,80	270	135	0	0	0.003,0.011,0.011	0.179,0.18,0.179	-0.171	1,4,5	76,85,95	41,51,35	43,61,40	2.00257e-31	1.3158e-28	0.0131578947368,0.0470588235294,0.0526315789474	0.953488372093,0.83606557377,0.875	-0.850569	0.0284545
Chr2_9779528_9779606	AT2G22980	+	Chr2	9779528	9779606	FALSE	EI	28,38,47	245302292	89,72,81	125193121	270	135	0	0	0.054,0.059,0.074	0.263,0.157,0.251	-0.161	28,38,47	73,82,92	89,72,81	42,59,38	2.47608e-09	1.32142e-07	0.383561643836,0.463414634146,0.510869565217	1,1,1	-0.547385	0.0797059
Chr2_9786512_9786582	AT2G22990	+	Chr2	9786512	9786582	TRUE	U	30,104,67	466771862	160146149	242287235	270	135	0	0	0.031,0.063,0.037	0.248,0.203,0.241	-0.187	30,104,67	272381427	160146149	198228179	6.2663e-09	3.0385e-07	0.110294117647,0.272965879265,0.156908665105	0.808080808081,0.640350877193,0.832402234637	-0.580222	0.085
Chr2_9961186_9961351	AT2G23390	-	Chr2	9961186	9961351	TRUE	U	19,11,15	160111156	69,90,90	113137118	270	135	0	0	0.056,0.047,0.046	0.234,0.247,0.276	-0.203	20,13,17	183142195	74,94,96	171217185	6.98599e-22	2.05897e-19	0.109289617486,0.0915492957746,0.0871794871795	0.432748538012,0.433179723502,0.518918918919	-0.36561	0.0375845
Chr3_10286241_10286330	AT3G27770	-	Chr3	10286241	10286330	FALSE	U	6,11,13	191311415	42,25,41	158107142	270	135	0	0	0.015,0.017,0.015	0.117,0.105,0.126	-0.1	6,11,13	121165227	42,25,41	83,69,68	2.58398e-20	6.4707e-18	0.0495867768595,0.0666666666667,0.057268722467	0.506024096386,0.36231884058,0.602941176471	-0.432587	0.0480936
Chr3_10286615_10286728	AT3G27770	-	Chr3	10286615	10286728	FALSE	U	2,2,3	218315413	33,14,28	156113105	270	135	0	0	0.005,0.003,0.004	0.096,0.058,0.118	-0.087	2,2,3	153209287	33,14,28	106,87,87	8.80439e-18	1.6815e-15	0.0130718954248,0.00956937799043,0.0104529616725	0.311320754717,0.16091954023,0.32183908046	-0.253662	0.053804
Chr3_10448348_10448450	AT3G28070	+	Chr3	10448348	10448450	FALSE	EI	2,1,9	96,47,87	114113130	53,80,66	270	135	0	0	0.01,0.011,0.049	0.518,0.414,0.496	-0.453	2,1,9	53,26,54	114113130	54,75,62	3.78044e-28	1.94785e-25	0.0377358490566,0.0384615384615,0.166666666667	1,1,1	-0.919045	0.0372043
Chr3_10451904_10452019	AT3G28080	+	Chr3	10451904	10452019	TRUE	E	18,11,15	47,44,34	100143123	50,50,46	270	135	0	0	0.161,0.111,0.181	0.5,0.588,0.572	-0.402	18,11,15	38,28,29	100143123	73,82,71	1.09732e-13	1.24153e-11	0.473684210526,0.392857142857,0.51724137931	1,1,1	-0.538739	0.0712184
Chr3_10969081_10969186	AT3G28940	-	Chr3	10969081	10969186	FALSE	U	30,37,30	530391572	197204213	467456465	270	135	0	0	0.028,0.045,0.026	0.174,0.183,0.186	-0.148	30,37,30	182140211	197204213	180175174	4.04644e-48	7.43082e-45	0.164835164835,0.264285714286,0.142180094787	1,1,1	-0.809566	0.0225
Chr3_11012551_11012902	AT3G29030	-	Chr3	11012551	11012902	FALSE	U	13,5,13	193,77,211	76,63,64	125133131	270	135	0	0	0.033,0.031,0.03	0.233,0.191,0.196	-0.175	32,15,34	386194417	123121112	318356323	1.69742e-27	8.21403e-25	0.0829015544041,0.0773195876289,0.0815347721823	0.38679245283,0.339887640449,0.346749226006	-0.277224	0.0378462
Chr3_1119618_1119737	AT3G04240	-	Chr3	1119618	1119737	FALSE	U	0,0,0	61,47,62	43,34,38	79,67,72	270	135	0	0	0.0,0.0,0.0	0.214,0.202,0.209	-0.208	0,0,0	57,54,69	43,34,38	90,96,98	1.99733e-22	6.16582e-20	0.0,0.0,0.0	0.477777777778,0.354166666667,0.387755102041	-0.406567	0.0405714
Chr3_11255173_11255250	AT3G29320	+	Chr3	11255173	11255250	FALSE	U	3,1,5	418423596	36,57,60	351407380	270	135	0	0	0.004,0.001,0.004	0.049,0.065,0.073	-0.059	3,1,5	282249335	36,57,60	224260243	8.94879e-25	3.40906e-22	0.0106382978723,0.00401606425703,0.0149253731343	0.160714285714,0.219230769231,0.246913580247	-0.199093	0.0401255
Chr3_11921853_11921928	AT3G30300	-	Chr3	11921853	11921928	FALSE	U	18,20,20	116114129	76,77,72	111,91,113	270	135	0	0	0.072,0.081,0.072	0.255,0.297,0.242	-0.19	18,20,20	41,38,44	76,77,72	43,45,46	2.5927e-15	3.6697e-13	0.439024390244,0.526315789474,0.454545454545	1,1,1	-0.526705	0.0637121
Chr3_1356492_1356573	AT3G04910	+	Chr3	1356492	1356573	FALSE	U	31,22,30	158189250	79,99,104	105129132	270	135	0	0	0.089,0.055,0.057	0.273,0.277,0.283	-0.211	31,22,30	125152164	79,99,104	111127132	7.8856e-23	2.49893e-20	0.248,0.144736842105,0.182926829268	0.711711711712,0.779527559055,0.787878787879	-0.567818	0.0402905
Chr3_1460330_1460434	AT3G05165	-	Chr3	1460330	1460434	FALSE	U	0,4,8	90,68,123	70,36,63	117125106	270	135	0	0	0.0,0.029,0.031	0.23,0.126,0.229	-0.175	0,4,8	67,67,112	70,36,63	147112115	4.47212e-11	3.40009e-09	0.0,0.0597014925373,0.0714285714286	0.47619047619,0.321428571429,0.547826086957	-0.404772	0.0776316
Chr3_16015561_16015743	AT3G44340	-	Chr3	16015561	16015743	FALSE	U	0,0,4	59,54,56	27,51,42	46,55,40	270	135	0	0	0.0,0.0,0.034	0.227,0.317,0.344	-0.285	0,0,4	90,76,98	36,62,48	113114105	1.18794e-15	1.77618e-13	0.0,0.0,0.0408163265306	0.318584070796,0.543859649123,0.457142857143	-0.426257	0.0618605
Chr3_16623213_16623305	AT3G45300	-	Chr3	16623213	16623305	FALSE	U	1,11,8	57,164,93	56,41,67	74,49,68	270	135	0	0	0.009,0.032,0.041	0.275,0.295,0.33	-0.273	1,11,8	39,107,76	56,41,67	60,52,56	5.95913e-21	1.57486e-18	0.025641025641,0.102803738318,0.105263157895	0.933333333333,0.788461538462,1	-0.829362	0.0477966
Chr3_16821750_16821832	AT3G45780	+	Chr3	16821750	16821832	FALSE	U	0,6,2	240327340	71,61,32	270283232	270	135	0	0	0.0,0.009,0.003	0.116,0.097,0.065	-0.089	0,6,2	153221232	71,61,32	181195178	3.98092e-11	3.05129e-09	0.0,0.027149321267,0.00862068965517	0.39226519337,0.312820512821,0.179775280899	-0.28303	0.0853802
Chr3_16915024_16915102	AT3G46040	+	Chr3	16915024	16915102	FALSE	U	3,4,13	386310431	63,55,88	404352397	270	135	0	0	0.004,0.006,0.015	0.072,0.072,0.1	-0.073	3,4,13	200148223	63,55,88	212185211	3.17857e-15	4.39472e-13	0.015,0.027027027027,0.0582959641256	0.297169811321,0.297297297297,0.417061611374	-0.303735	0.064813
Chr3_16930533_16930699	AT3G46100	-	Chr3	16930533	16930699	FALSE	U	0,0,3	119,90,118	41,32,21	91,86,74	270	135	0	0	0.0,0.0,0.013	0.184,0.157,0.124	-0.151	0,0,3	119106120	44,34,23	135121114	4.17635e-17	7.5521e-15	0.0,0.0,0.025	0.325925925926,0.280991735537,0.201754385965	-0.261224	0.0568258
Chr3_16945751_16945853	AT3G46130	+	Chr3	16945751	16945853	FALSE	U	53,8,36	65,34,61	254303302	26,47,29	270	135	0	0	0.29,0.105,0.228	0.83,0.763,0.839	-0.603	53,8,36	58,27,63	254303302	76,101,96	3.64296e-12	3.25724e-10	0.913793103448,0.296296296296,0.571428571429	1,1,1	-0.406161	0.07904
Chr3_17306123_17306233	AT3G46970	-	Chr3	17306123	17306233	FALSE	U	7,0,2	380271443	38,43,59	307337314	270	135	0	0	0.009,0.0,0.002	0.058,0.06,0.086	-0.064	7,0,2	608503687	38,43,59	560607591	4.85951e-13	4.88811e-11	0.0115131578947,0.0,0.00291120815138	0.0678571428571,0.0708401976936,0.0998307952623	-0.0747013	0.0761884
Chr3_17526409_17526489	AT3G47560	-	Chr3	17526409	17526489	TRUE	U	14,8,16	97129113	61,63,67	139,93,99	270	135	0	0	0.067,0.03,0.066	0.18,0.253,0.253	-0.174	14,8,16	57,61,69	61,63,67	84,66,73	4.11311e-13	4.1784e-11	0.245614035088,0.131147540984,0.231884057971	0.72619047619,0.954545454545,0.917808219178	-0.6633	0.0761207
Chr3_1765928_1766162	AT3G05910	-	Chr3	1765928	1766162	FALSE	U	1,1,2	116149186	54,53,49	137132117	270	135	0	0	0.004,0.003,0.005	0.165,0.167,0.173	-0.164	1,2,2	123163194	72,63,63	187156168	2.76903e-38	2.87413e-35	0.00813008130081,0.0122699386503,0.0103092783505	0.385026737968,0.403846153846,0.375	-0.377721	0.0282418
Chr3_17930058_17930125	AT3G48420	+	Chr3	17930058	17930125	FALSE	U	22,17,37	551396543	118107138	428508417	270	135	0	0	0.02,0.021,0.033	0.121,0.095,0.142	-0.095	22,17,37	251219268	118107138	241281252	6.72919e-13	6.62003e-11	0.0876494023904,0.0776255707763,0.138059701493	0.489626556017,0.380782918149,0.547619047619	-0.371565	0.0766667
Chr3_18333987_18334216	AT3G49430	+	Chr3	18333987	18334216	FALSE	U	11,4,8	153131160	63,79,95	175147183	270	135	0	0	0.035,0.015,0.024	0.153,0.212,0.206	-0.166	14,4,9	248210276	86,98,135	320305335	8.69842e-17	1.50841e-14	0.0564516129032,0.0190476190476,0.0326086956522	0.26875,0.32131147541,0.402985074627	-0.29498	0.0591484
Chr3_18422894_18422968	AT3G49680	+	Chr3	18422894	18422968	FALSE	I	5,1,4	250187273	65,48,46	222231220	270	135	0	0	0.01,0.003,0.007	0.128,0.094,0.095	-0.099	5,1,4	117,71,124	65,48,46	113120128	4.47316e-16	7.11918e-14	0.042735042735,0.0140845070423,0.0322580645161	0.575221238938,0.4,0.359375	-0.415173	0.0608312
Chr3_18425051_18425152	AT3G49680	+	Chr3	18425051	18425152	FALSE	U	11,1,14	271176251	73,94,93	226282287	270	135	0	0	0.02,0.003,0.027	0.139,0.143,0.139	-0.124	11,1,14	159,97,169	73,94,93	155164174	1.45294e-27	7.07878e-25	0.0691823899371,0.0103092783505,0.0828402366864	0.470967741935,0.573170731707,0.534482758621	-0.472096	0.0373659
Chr3_18500069_18500152	AT3G49890	+	Chr3	18500069	18500152	TRUE	U	6,5,3	19,13,19	54,56,58	16,9,13	270	135	0	0	0.136,0.161,0.073	0.628,0.757,0.69	-0.568	6,5,3	15,9,17	54,56,58	31,28,29	1.91442e-14	2.42242e-12	0.4,0.555555555556,0.176470588235	1,1,1	-0.622658	0.0688235
Chr3_18743498_18743727	AT3G50500	-	Chr3	18743498	18743727	FALSE	U	3,0,3	240254296	28,23,30	152137149	270	135	0	0	0.006,0.0,0.005	0.084,0.077,0.091	-0.08	3,0,3	482503597	33,29,36	320316314	2.15972e-27	1.03118e-24	0.00622406639004,0.0,0.00502512562814	0.103125,0.0917721518987,0.114649681529	-0.0994325	0.0372642
Chr3_188710_189004	AT3G01480	+	Chr3	188710	189004	FALSE	U	5,0,1	615510671	92,70,71	639682720	270	135	0	0	0.004,0.0,0.001	0.067,0.049,0.047	-0.053	7,2,3	138711511451	126103119	142015301541	9.30685e-44	1.41819e-40	0.00504686373468,0.00173761946134,0.00206753962784	0.0887323943662,0.0673202614379,0.0772225827385	-0.0748077	0.0227941
Chr3_189628_189740	AT3G01480	+	Chr3	189628	189740	FALSE	U	224191222	582541649	435500553	511539532	270	135	0	0	0.161,0.15,0.146	0.299,0.317,0.342	-0.167	224191222	531441555	435500553	544586590	3.27694e-22	1.00726e-19	0.421845574388,0.433106575964,0.4	0.799632352941,0.853242320819,0.937288135593	-0.44507	0.0399583
Chr3_190199_190284	AT3G01480	+	Chr3	190199	190284	TRUE	U	50,18,29	782705838	182226211	737806811	270	135	0	0	0.031,0.013,0.017	0.11,0.123,0.115	-0.096	50,18,29	404335423	182226211	414446449	6.83782e-14	7.97586e-12	0.123762376238,0.0537313432836,0.0685579196217	0.43961352657,0.506726457399,0.469933184855	-0.390074	0.0631378
Chr3_19084481_19084556	AT3G51420	+	Chr3	19084481	19084556	FALSE	U	22,7,33	193166204	147222165	118149151	270	135	0	0	0.054,0.021,0.075	0.384,0.427,0.353	-0.338	22,7,33	107101126	147222165	138157145	6.02173e-10	3.64556e-08	0.205607476636,0.0693069306931,0.261904761905	1,1,1	-0.82106	0.0994737
Chr3_19150666_19150757	AT3G51630	+	Chr3	19150666	19150757	FALSE	U	4,3,2	47,48,52	33,50,59	37,65,47	270	135	0	0	0.041,0.03,0.019	0.308,0.278,0.386	-0.294	4,3,2	45,31,45	33,50,59	39,52,46	1.06518e-18	2.25035e-16	0.0888888888889,0.0967741935484,0.0444444444444	0.846153846154,0.961538461538,1	-0.859195	0.0531395
Chr3_19318686_19318774	AT3G52090	-	Chr3	19318686	19318774	FALSE	U	0,2,2	258257317	25,48,34	256286293	270	135	0	0	0.0,0.004,0.003	0.047,0.077,0.055	-0.057	0,2,2	170130185	25,48,34	147163167	2.12407e-16	3.47315e-14	0.0,0.0153846153846,0.0108108108108	0.170068027211,0.294478527607,0.203592814371	-0.213981	0.0609896
Chr3_19590742_19590832	AT3G52850	+	Chr3	19590742	19590832	FALSE	U	16,3,9	167140199	66,56,55	117140154	270	135	0	0	0.046,0.011,0.022	0.22,0.167,0.152	-0.153	16,3,9	116103129	66,56,55	103108110	1.31795e-10	9.21778e-09	0.137931034483,0.0291262135922,0.0697674418605	0.640776699029,0.518518518519,0.5	-0.474157	0.0942446
Chr3_19683670_19683747	AT3G53090	+	Chr3	19683670	19683747	FALSE	U	3,1,4	20,16,14	35,52,62	11,10,18	270	135	0	0	0.07,0.03,0.125	0.614,0.722,0.633	-0.581	3,1,4	8,7,11	35,52,62	15,15,17	1.99959e-12	1.85744e-10	0.375,0.142857142857,0.363636363636	1,1,1	-0.706169	0.0797431
Chr3_19963495_19963582	AT3G53920	-	Chr3	19963495	19963582	FALSE	U	3,0,1	80,106,99	27,32,18	81,68,99	270	135	0	0	0.018,0.0,0.005	0.143,0.19,0.083	-0.131	3,0,1	73,80,87	27,32,18	95,101,97	8.46548e-11	6.14275e-09	0.041095890411,0.0,0.0114942528736	0.284210526316,0.316831683168,0.185567010309	-0.244673	0.0919964
Chr3_2042493_2042631	AT3G06550	-	Chr3	2042493	2042631	FALSE	U	0,0,1	63,35,75	20,25,30	73,47,55	270	135	0	0	0.0,0.0,0.007	0.12,0.21,0.214	-0.179	0,0,1	75,61,90	20,25,30	109,95,100	3.66468e-13	3.75481e-11	0.0,0.0,0.0111111111111	0.183486238532,0.263157894737,0.3	-0.245178	0.068662
Chr3_20637659_20637739	AT3G55630	+	Chr3	20637659	20637739	FALSE	I	15,6,9	238147220	71,88,72	290366283	270	135	0	0	0.031,0.02,0.02	0.109,0.107,0.113	-0.086	15,6,9	116,87,113	71,88,72	170202168	8.28612e-15	1.10305e-12	0.129310344828,0.0689655172414,0.0796460176991	0.417647058824,0.435643564356,0.428571428571	-0.334647	0.0689125
Chr3_20793903_20794041	AT3G56040	-	Chr3	20793903	20794041	FALSE	U	0,0,1	152130145	62,48,73	139176141	270	135	0	0	0.0,0.0,0.003	0.182,0.12,0.206	-0.168	0,0,1	127113142	62,48,73	165183168	1.01521e-23	3.52953e-21	0.0,0.0,0.00704225352113	0.375757575758,0.262295081967,0.434523809524	-0.355178	0.0428623
Chr3_20836852_20837064	AT3G56150	-	Chr3	20836852	20837064	FALSE	EI	9,10,19	168115184	131,140,99	145133156	270	135	0	0	0.026,0.042,0.049	0.311,0.345,0.241	-0.26	10,10,19	348275442	148165119	489482490	1.92131e-26	8.49395e-24	0.0287356321839,0.0363636363636,0.0429864253394	0.302658486708,0.342323651452,0.242857142857	-0.259918	0.0394348
Chr3_21012462_21012664	AT3G56720	+	Chr3	21012462	21012664	TRUE	U	13,9,22	84109111	172192151	56,71,83	270	135	0	0	0.072,0.04,0.09	0.606,0.575,0.476	-0.485	14,10,28	123138171	204226179	208233224	1.83006e-28	9.6895e-26	0.113821138211,0.0724637681159,0.163742690058	0.980769230769,0.969957081545,0.799107142857	-0.799935	0.0380711
Chr3_21114331_21114458	AT3G57050	-	Chr3	21114331	21114458	FALSE	E	1,1,3	145116162	26,29,15	88108118	270	135	0	0	0.003,0.004,0.009	0.129,0.118,0.06	-0.097	1,1,3	119,85,133	26,29,15	88,99,98	8.29384e-11	6.04884e-09	0.00840336134454,0.0117647058824,0.0225563909774	0.295454545455,0.292929292929,0.15306122449	-0.232907	0.0934477
Chr3_21206146_21206261	AT3G57300	+	Chr3	21206146	21206261	FALSE	E	0,0,4	55,50,44	35,35,30	43,63,30	270	135	0	0	0.0,0.0,0.043	0.289,0.217,0.333	-0.265	0,0,4	42,42,54	35,35,30	48,50,48	7.02018e-20	1.67036e-17	0.0,0.0,0.0740740740741	0.729166666667,0.7,0.625	-0.660031	0.0512727
Chr3_21670186_21670861	AT3G58600	-	Chr3	21670186	21670861	FALSE	U	1,0,0	41,52,53	22,13,19	47,51,46	270	135	2.66454e-15	4.20993e-13	0.012,0.0,0.0	0.19,0.113,0.171	-0.154	1,6,4	220195248	49,49,40	266248230	7.82161e-19	1.68728e-16	0.00454545454545,0.0307692307692,0.0161290322581	0.184210526316,0.197580645161,0.173913043478	-0.168087	0.0776181
Chr3_22037087_22037186	AT3G59660	-	Chr3	22037087	22037186	FALSE	U	0,0,0	51,40,60	48,28,44	29,46,43	270	135	0	0	0.0,0.0,0.0	0.453,0.233,0.338	-0.341	0,0,0	40,34,51	48,28,44	41,41,43	5.43183e-22	1.62093e-19	0.0,0.0,0.0	1,0.682926829268,1	-0.894309	0.0475601
Chr3_22086559_22086663	AT3G59780	+	Chr3	22086559	22086663	FALSE	U	7,7,7	165127166	54,47,49	155161146	270	135	0	0	0.021,0.027,0.021	0.148,0.127,0.144	-0.117	7,7,7	244205279	54,47,49	258282275	9.77957e-17	1.67561e-14	0.0286885245902,0.0341463414634,0.0250896057348	0.209302325581,0.166666666667,0.178181818182	-0.155409	0.0611488
Chr3_22089022_22089132	AT3G59780	+	Chr3	22089022	22089132	FALSE	U	1,1,0	262230343	39,47,39	331313354	270	135	0	0	0.002,0.002,0.0	0.056,0.07,0.052	-0.058	1,1,0	258217295	39,47,39	272298291	2.40068e-26	1.05481e-23	0.00387596899225,0.00460829493088,0.0	0.143382352941,0.157718120805,0.134020618557	-0.142212	0.0395708
Chr3_22089217_22089309	AT3G59780	+	Chr3	22089217	22089309	FALSE	U	9,4,3	309263337	47,86,70	307340392	270	135	0	0	0.014,0.008,0.004	0.071,0.112,0.082	-0.08	9,4,3	216182247	47,86,70	228250244	2.16815e-14	2.7147e-12	0.0416666666667,0.021978021978,0.0121457489879	0.206140350877,0.344,0.286885245902	-0.253745	0.0722551
Chr3_22407211_22407292	AT3G60620	+	Chr3	22407211	22407292	FALSE	U	3,0,1	128,67,118	26,21,32	74,97,83	270	135	0	0	0.012,0.0,0.004	0.149,0.098,0.162	-0.131	3,0,1	37,21,39	26,21,32	31,42,36	3.08635e-11	2.40262e-09	0.0810810810811,0.0,0.025641025641	0.838709677419,0.5,0.888888888889	-0.706959	0.0906972
Chr3_22622312_22622396	AT3G61130	+	Chr3	22622312	22622396	FALSE	U	2,0,3	177190209	50,54,39	156159176	270	135	0	0	0.006,0.0,0.007	0.138,0.145,0.1	-0.123	2,0,3	87,82,111	50,54,39	97,92,94	2.00456e-25	8.20371e-23	0.0229885057471,0.0,0.027027027027	0.515463917526,0.586956521739,0.414893617021	-0.4891	0.0415854
Chr3_22623062_22623151	AT3G61130	+	Chr3	22623062	22623151	FALSE	U	0,2,0	217245323	53,57,56	213220189	270	135	0	0	0.0,0.004,0.0	0.111,0.115,0.129	-0.117	0,2,0	92,87,118	53,57,56	102,98,99	2.79035e-37	2.66456e-34	0.0,0.0229885057471,0.0	0.519607843137,0.581632653061,0.565656565657	-0.54797	0.0309091
Chr3_2270665_2270807	AT3G07160	-	Chr3	2270665	2270807	FALSE	U	0,2,1	89,88,121	29,27,23	62,50,57	270	135	0	0	0.0,0.011,0.004	0.19,0.213,0.168	-0.185	0,2,1	95,83,117	29,27,23	80,76,76	1.86732e-20	4.709e-18	0.0,0.0240963855422,0.00854700854701	0.3625,0.355263157895,0.302631578947	-0.32925	0.0452482
Chr3_22736428_22736519	AT3G61440	+	Chr3	22736428	22736519	FALSE	I	7,14,11	342318427	149170207	406393375	270	135	0	0	0.01,0.022,0.013	0.155,0.178,0.216	-0.168	7,14,11	292300364	149170207	426454448	1.29699e-36	1.20635e-33	0.0239726027397,0.0466666666667,0.0302197802198	0.349765258216,0.374449339207,0.462053571429	-0.361803	0.0313139
Chr3_22778908_22779004	AT3G61560	+	Chr3	22778908	22779004	TRUE	U	0,0,1	25,9,32	28,28,18	22,20,14	270	135	0	0	0.0,0.0,0.015	0.389,0.412,0.391	-0.392	0,0,1	15,11,19	28,28,18	21,17,17	5.03657e-14	5.95238e-12	0.0,0.0,0.0526315789474	1,1,1	-0.982456	0.0739216
Chr3_2291544_2291638	AT3G07200	+	Chr3	2291544	2291638	FALSE	U	1,0,2	56,58,69	42,45,36	77,66,61	270	135	0	0	0.009,0.0,0.014	0.214,0.254,0.228	-0.224	1,0,2	32,25,41	42,45,36	41,38,30	3.1378e-21	8.64331e-19	0.03125,0.0,0.0487804878049	1,1,1	-0.973323	0.0434831
Chr3_23214501_23214594	AT3G62750	+	Chr3	23214501	23214594	TRUE	U	8,12,11	295190278	42,56,72	159163159	270	135	0	0	0.013,0.031,0.019	0.117,0.147,0.185	-0.129	8,12,11	192158198	42,56,72	123151133	5.91451e-17	1.04076e-14	0.0416666666667,0.0759493670886,0.0555555555556	0.341463414634,0.370860927152,0.541353383459	-0.360169	0.0610733
Chr3_23327755_23327821	AT3G63140	-	Chr3	23327755	23327821	FALSE	U	237124196	207018902195	471556465	130916431408	270	135	0	0	0.054,0.032,0.043	0.152,0.145,0.142	-0.103	237124196	788659854	471556465	497631530	5.06627e-18	9.83309e-16	0.30076142132,0.188163884674,0.229508196721	0.9476861167,0.881141045959,0.877358490566	-0.662584	0.058843
Chr3_23344101_23344183	AT3G63190	-	Chr3	23344101	23344183	FALSE	U	6,3,17	697543735	127138108	523552539	270	135	0	0	0.004,0.003,0.011	0.108,0.111,0.091	-0.097	6,3,17	303266334	127138108	272304280	4.00154e-21	1.08968e-18	0.019801980198,0.0112781954887,0.0508982035928	0.466911764706,0.453947368421,0.385714285714	-0.408198	0.0498397
Chr3_23371782_23371869	AT3G63250	-	Chr3	23371782	23371869	FALSE	U	0,0,0	77,58,79	26,20,32	42,50,39	270	135	0	0	0.0,0.0,0.0	0.236,0.167,0.291	-0.231	0,0,0	36,34,42	26,20,32	36,32,39	1.13168e-20	2.92599e-18	0.0,0.0,0.0	0.722222222222,0.625,0.820512820513	-0.722578	0.0513438
Chr3_23432641_23432733	AT3G63460	-	Chr3	23432641	23432733	FALSE	U	0,0,1	134,98,141	33,20,35	126144120	270	135	0	0	0.0,0.0,0.004	0.116,0.065,0.127	-0.101	0,0,1	96,73,107	33,20,35	100,102,99	1.84512e-15	2.66961e-13	0.0,0.0,0.00934579439252	0.33,0.196078431373,0.353535353535	-0.290089	0.0685
Chr3_23444599_23444672	AT3G63490	+	Chr3	23444599	23444672	FALSE	U	39,42,44	9878491076	93114100	600718645	270	135	0	0	0.019,0.024,0.02	0.072,0.074,0.072	-0.052	39,42,44	783674871	93114100	537615580	1.23029e-23	4.23615e-21	0.0498084291188,0.0623145400593,0.0505166475316	0.173184357542,0.185365853659,0.172413793103	-0.122775	0.0452817
Chr3_23453837_23453921	AT3G63520	+	Chr3	23453837	23453921	FALSE	U	127108154	452528597	351476421	256347232	270	135	0	0	0.123,0.093,0.114	0.407,0.407,0.476	-0.32	127108154	293296357	351476421	269308257	6.62101e-37	6.23934e-34	0.433447098976,0.364864864865,0.43137254902	1,1,1	-0.590105	0.0315942
Chr3_2453999_2454084	AT3G07670	+	Chr3	2453999	2454084	FALSE	U	5,4,3	126100157	61,63,51	127143123	270	135	0	0	0.019,0.02,0.009	0.194,0.181,0.172	-0.166	5,4,3	58,47,69	61,63,51	73,79,68	2.84655e-23	9.61637e-21	0.0862068965517,0.0851063829787,0.0434782608696	0.835616438356,0.79746835443,0.75	-0.722764	0.0394017
Chr3_3103073_3103167	AT3G10060	+	Chr3	3103073	3103167	FALSE	U	32,14,32	241233280	59,72,82	175205163	270	135	0	0	0.062,0.029,0.054	0.144,0.149,0.201	-0.116	32,14,32	223189255	59,72,82	172203182	2.31023e-09	1.24217e-07	0.143497757848,0.0740740740741,0.125490196078	0.343023255814,0.354679802956,0.450549450549	-0.268397	0.0954321
Chr3_3171989_3172072	AT3G10260	-	Chr3	3171989	3172072	FALSE	U	11,8,13	135,96,217	54,81,62	113113132	270	135	0	0	0.039,0.04,0.029	0.193,0.264,0.19	-0.18	11,8,13	65,53,111	54,81,62	70,67,72	5.51844e-16	8.68626e-14	0.169230769231,0.150943396226,0.117117117117	0.771428571429,1,0.861111111111	-0.731749	0.0565812
Chr3_341858_341921	AT3G02020	-	Chr3	341858	341921	FALSE	U	28,17,14	345201437	206267284	205390286	270	135	0	0	0.039,0.041,0.016	0.334,0.255,0.332	-0.275	28,17,14	42,19,53	206267284	34,60,51	2.56057e-13	2.69684e-11	0.666666666667,0.894736842105,0.264150943396	1,1,1	-0.391482	0.0666993
Chr3_352184_352296	AT3G02050	+	Chr3	352184	352296	FALSE	U	0,0,4	62,60,84	38,49,46	63,70,87	270	135	0	0	0.0,0.0,0.023	0.232,0.259,0.209	-0.226	0,0,4	69,67,84	38,49,46	87,99,92	2.88089e-23	9.68668e-21	0.0,0.0,0.047619047619	0.436781609195,0.494949494949,0.5	-0.461371	0.0391071
Chr3_356946_357055	AT3G02060	+	Chr3	356946	357055	FALSE	U	4,3,2	84,90,106	43,55,40	131146131	270	135	0	0	0.023,0.016,0.009	0.141,0.159,0.132	-0.128	4,3,2	62,52,75	43,55,40	92,98,96	1.07854e-15	1.63306e-13	0.0645161290323,0.0576923076923,0.0266666666667	0.467391304348,0.561224489796,0.416666666667	-0.432136	0.0553714
Chr3_3762375_3762467	AT3G11910	-	Chr3	3762375	3762467	FALSE	U	0,1,8	66,83,103	66,69,72	85,94,77	270	135	0	0	0.0,0.006,0.037	0.28,0.268,0.319	-0.275	0,1,8	62,54,74	66,69,72	74,72,74	1.01411e-22	3.18154e-20	0.0,0.0185185185185,0.108108108108	0.891891891892,0.958333333333,0.972972972973	-0.898857	0.041417
Chr3_39965_40042	AT3G01120	-	Chr3	39965	40042	FALSE	U	1,5,4	444275526	60,46,72	399449445	270	135	0	0	0.001,0.009,0.004	0.07,0.049,0.075	-0.06	1,5,4	228138248	60,46,72	209232231	8.27057e-18	1.58377e-15	0.00438596491228,0.036231884058,0.0161290322581	0.287081339713,0.198275862069,0.311688311688	-0.246766	0.0496091
Chr3_4159247_4159331	AT3G13000	-	Chr3	4159247	4159331	FALSE	U	1,0,0	76,105,95	23,29,23	109,87,125	270	135	0	0	0.007,0.0,0.0	0.095,0.143,0.084	-0.105	1,0,0	27,39,34	23,29,23	49,42,45	1.95987e-14	2.46685e-12	0.037037037037,0.0,0.0	0.469387755102,0.690476190476,0.511111111111	-0.544646	0.0632316
Chr3_4471108_4471179	AT3G13670	+	Chr3	4471108	4471179	FALSE	U	6,6,9	173148250	105,73,73	204171181	270	135	0	0	0.017,0.02,0.018	0.205,0.176,0.168	-0.165	6,6,9	94,82,126	105,73,73	108112111	3.87412e-21	1.05901e-18	0.063829787234,0.0731707317073,0.0714285714286	0.972222222222,0.651785714286,0.657657657658	-0.691079	0.0436559
Chr3_4567171_4567260	AT3G13870	-	Chr3	4567171	4567260	FALSE	U	16,29,26	162131196	117106129	144126130	270	135	0	0	0.047,0.1,0.062	0.289,0.296,0.332	-0.236	16,29,26	94,72,110	117106129	98,95,95	6.09568e-16	9.55287e-14	0.170212765957,0.402777777778,0.236363636364	1,1,1	-0.730215	0.0566667
Chr3_4599284_4599370	AT3G13930	+	Chr3	4599284	4599370	FALSE	U	1,2,0	215160232	32,49,44	211231224	270	135	0	0	0.002,0.006,0.0	0.07,0.096,0.089	-0.082	1,2,0	113,73,124	32,49,44	115121119	4.33505e-22	1.31001e-19	0.00884955752212,0.027397260274,0.0	0.278260869565,0.404958677686,0.36974789916	-0.338907	0.0424314
Chr3_4639108_4639192	AT3G14010	+	Chr3	4639108	4639192	FALSE	U	16,25,22	68,93,100	136120143	48,63,52	270	135	0	0	0.105,0.118,0.099	0.586,0.488,0.579	-0.444	16,25,22	37,45,55	136120143	47,51,44	1.0007e-28	5.42947e-26	0.432432432432,0.555555555556,0.4	1,1,1	-0.537337	0.036646
Chr3_4677002_4677132	AT3G14110	-	Chr3	4677002	4677132	TRUE	EI	18,19,24	449346506	86,67,76	378330431	270	135	0	0	0.02,0.027,0.023	0.102,0.092,0.081	-0.068	18,19,24	368307413	86,67,76	339323363	1.8819e-18	3.89538e-16	0.0489130434783,0.0618892508143,0.0581113801453	0.253687315634,0.207430340557,0.209366391185	-0.16719	0.0499048
Chr3_4925901_4926036	AT3G14660	+	Chr3	4925901	4926036	FALSE	U	25,10,35	290340550	71,89,75	197260206	270	135	0	0	0.041,0.014,0.031	0.153,0.146,0.154	-0.122	25,10,35	256279449	71,89,75	262296251	1.49645e-12	1.41443e-10	0.09765625,0.0358422939068,0.0779510022272	0.270992366412,0.300675675676,0.298804780876	-0.219674	0.0732823
Chr3_4991012_4991097	AT3G14840	+	Chr3	4991012	4991097	FALSE	U	1,0,0	102,82,106	43,19,20	102,76,97	270	135	0	0	0.005,0.0,0.0	0.174,0.111,0.093	-0.124	1,0,0	67,69,74	43,19,20	88,73,69	5.47127e-13	5.44232e-11	0.0149253731343,0.0,0.0	0.488636363636,0.260273972603,0.289855072464	-0.34128	0.0726517
Chr3_503518_503584	AT3G02450	-	Chr3	503518	503584	FALSE	U	3,3,4	247201298	38,37,32	201274216	270	135	0	0	0.006,0.007,0.007	0.086,0.063,0.069	-0.066	3,3,4	85,55,95	38,37,32	65,88,76	1.10917e-16	1.87353e-14	0.0352941176471,0.0545454545455,0.0421052631579	0.584615384615,0.420454545455,0.421052631579	-0.431393	0.0526946
Chr3_5369772_5369853	AT3G15880	-	Chr3	5369772	5369853	FALSE	U	0,0,3	71,53,78	22,22,31	59,59,43	270	135	0	0	0.0,0.0,0.019	0.157,0.157,0.265	-0.187	0,0,3	46,38,56	22,22,31	50,52,52	1.94578e-14	2.45343e-12	0.0,0.0,0.0535714285714	0.44,0.423076923077,0.596153846154	-0.468553	0.0646617
Chr3_5579454_5579529	AT3G16420	+	Chr3	5579454	5579529	FALSE	E	15,6,25	183,99,174	77,62,68	152140123	270	135	0	0	0.039,0.029,0.067	0.202,0.181,0.217	-0.155	15,6,25	354216405	77,62,68	310328307	1.07824e-15	1.63306e-13	0.0423728813559,0.0277777777778,0.0617283950617	0.248387096774,0.189024390244,0.221498371336	-0.175677	0.0595924
Chr3_5596345_5596434	AT3G16470	-	Chr3	5596345	5596434	FALSE	U	18,18,53	246157338	101,93,112	139149163	270	135	0	0	0.035,0.054,0.073	0.266,0.238,0.256	-0.199	18,18,53	164,95,246	101,93,112	113117124	3.29518e-17	5.98979e-15	0.109756097561,0.189473684211,0.215447154472	0.893805309735,0.794871794872,0.903225806452	-0.692409	0.0534104
Chr3_5636533_5636613	AT3G16560	-	Chr3	5636533	5636613	FALSE	U	1,0,1	74,51,78	20,26,26	69,82,66	270	135	0	0	0.007,0.0,0.006	0.127,0.137,0.165	-0.139	1,0,1	36,22,40	20,26,26	35,43,38	4.49074e-15	6.13783e-13	0.0277777777778,0.0,0.025	0.571428571429,0.604651162791,0.684210526316	-0.602504	0.0625193
Chr3_588714_588888	AT3G02730	-	Chr3	588714	588888	FALSE	U	142,66,164	137213691813	293421402	104112271087	270	135	0	0	0.049,0.024,0.043	0.123,0.146,0.156	-0.103	158,75,178	148412771806	333476453	111113231195	7.02789e-11	5.19433e-09	0.106469002695,0.0587314017228,0.0985603543743	0.299729972997,0.359788359788,0.379079497908	-0.258279	0.078125
Chr3_5958018_5958403	AT3G17410	+	Chr3	5958018	5958403	FALSE	U	1,1,4	178147174	23,19,29	152145138	270	135	8.88178e-16	1.49739e-13	0.003,0.003,0.011	0.07,0.061,0.095	-0.07	5,3,10	372322443	48,50,60	433330374	2.25195e-18	4.62126e-16	0.0134408602151,0.00931677018634,0.0225733634312	0.110854503464,0.151515151515,0.160427807487	-0.125822	0.0771014
Chr3_614130_614256	AT3G02830	+	Chr3	614130	614256	TRUE	U	11,1,16	103,63,109	47,67,56	64107117	270	135	0	0	0.051,0.008,0.068	0.269,0.238,0.193	-0.191	11,1,16	153,79,136	47,67,56	153220206	5.23064e-10	3.2211e-08	0.0718954248366,0.0126582278481,0.117647058824	0.307189542484,0.304545454545,0.271844660194	-0.227126	0.0861582
Chr3_6155978_6156069	AT3G18000	+	Chr3	6155978	6156069	FALSE	U	2,0,0	118,58,130	22,18,18	50,79,82	270	135	0	0	0.008,0.0,0.0	0.18,0.102,0.099	-0.124	2,0,0	92,48,105	22,18,18	51,61,63	1.14676e-15	1.7218e-13	0.0217391304348,0.0,0.0	0.43137254902,0.295081967213,0.285714285714	-0.330143	0.0602965
Chr3_6213312_6213410	AT3G18140	-	Chr3	6213312	6213410	FALSE	U	6,2,5	214160217	54,78,63	100124102	270	135	0	0	0.014,0.006,0.011	0.213,0.239,0.236	-0.219	6,2,5	93,68,101	54,78,63	53,55,55	8.09179e-38	8.03624e-35	0.0645161290323,0.0294117647059,0.049504950495	1,1,1	-0.952189	0.0287156
Chr3_6887739_6887850	AT3G19830	-	Chr3	6887739	6887850	FALSE	U	1,0,0	34,37,34	37,37,36	24,34,45	270	135	0	0	0.014,0.0,0.0	0.435,0.352,0.286	-0.353	1,0,0	39,33,47	37,37,36	53,49,49	1.01729e-22	3.18154e-20	0.025641025641,0.0,0.0	0.698113207547,0.755102040816,0.734693877551	-0.720756	0.0433333
Chr3_6955782_6955885	AT3G19960	+	Chr3	6955782	6955885	FALSE	U	1,0,0	64,74,90	38,35,25	81,75,58	270	135	0	0	0.008,0.0,0.0	0.19,0.189,0.177	-0.183	1,0,0	57,64,74	38,35,25	70,79,72	1.52324e-19	3.48539e-17	0.0175438596491,0.0,0.0	0.542857142857,0.443037974684,0.347222222222	-0.438524	0.049541
Chr3_7242376_7242459	AT3G20720	+	Chr3	7242376	7242459	FALSE	U	3,0,0	23,27,23	35,31,27	31,24,33	270	135	0	0	0.061,0.0,0.0	0.361,0.392,0.29	-0.327	3,0,0	16,15,19	35,31,27	22,26,24	1.68363e-14	2.16092e-12	0.1875,0.0,0.0	1,1,1	-0.9375	0.065199
Chr3_7835331_7835741	AT3G22200	+	Chr3	7835331	7835741	FALSE	EI	0,2,1	232266351	22,18,24	161188158	270	135	0	0	0.0,0.004,0.001	0.064,0.046,0.071	-0.059	0,4,1	8387861315	44,54,55	657718650	1.74219e-36	1.55968e-33	0.0,0.00508905852417,0.000760456273764	0.0669710806697,0.075208913649,0.0846153846154	-0.0736486	0.0296694
Chr3_8195818_8196074	AT3G23050	+	Chr3	8195818	8196074	TRUE	U	40,38,33	295319343	138129119	234263241	270	135	0	0	0.063,0.056,0.046	0.228,0.197,0.198	-0.153	57,80,47	604635742	210191171	663663575	1.80435e-10	1.22605e-08	0.0943708609272,0.125984251969,0.0633423180593	0.316742081448,0.288084464555,0.297391304348	-0.206173	0.0891822
Chr3_8208122_8208224	AT3G23080	-	Chr3	8208122	8208224	FALSE	U	2,4,7	86144132	25,29,15	63,55,59	270	135	0	0	0.011,0.014,0.026	0.166,0.209,0.113	-0.146	2,4,7	77131116	25,29,15	63,57,58	3.044e-11	2.37482e-09	0.025974025974,0.030534351145,0.0603448275862	0.396825396825,0.508771929825,0.258620689655	-0.349122	0.0824517
Chr3_9272310_9272379	AT3G25530	-	Chr3	9272310	9272379	TRUE	U	41,32,43	405263437	133183182	326382326	270	135	0	0	0.048,0.057,0.047	0.169,0.193,0.218	-0.143	41,32,43	171122175	133183182	163190179	5.22997e-27	2.43224e-24	0.239766081871,0.262295081967,0.245714285714	0.815950920245,0.963157894737,1	-0.677111	0.0378788
Chr3_9272892_9272975	AT3G25530	-	Chr3	9272892	9272975	FALSE	U	12,6,8	404269398	105,99,73	285309269	270	135	0	0	0.015,0.011,0.01	0.156,0.138,0.119	-0.126	12,6,8	205146210	105,99,73	196228215	4.88316e-24	1.74864e-21	0.0585365853659,0.041095890411,0.0380952380952	0.535714285714,0.434210526316,0.339534883721	-0.390577	0.0407377
Chr3_946164_946236	AT3G03770	-	Chr3	946164	946236	FALSE	U	30,15,22	62,39,66	83,119,96	46,43,47	270	135	0	0	0.195,0.161,0.143	0.474,0.58,0.505	-0.353	30,15,22	32,17,27	83,119,96	31,34,35	1.24723e-12	1.18784e-10	0.9375,0.882352941176,0.814814814815	1,1,1	-0.121777	0.0713164
Chr3_9909087_9909317	AT3G26890	-	Chr3	9909087	9909317	FALSE	I	0,1,0	39,45,52	18,26,16	59,58,51	270	135	1.0103e-14	1.45012e-12	0.0,0.011,0.0	0.132,0.183,0.136	-0.147	0,1,0	151163143	20,29,24	159160165	1.09452e-16	1.85315e-14	0.0,0.00613496932515,0.0	0.125786163522,0.18125,0.145454545455	-0.148785	0.0938559
Chr3_9912527_9912606	AT3G26900	-	Chr3	9912527	9912606	FALSE	U	4,6,10	197178219	117156134	169213197	270	135	0	0	0.01,0.017,0.022	0.257,0.268,0.254	-0.243	4,6,10	178142190	117156134	172202167	1.64827e-57	6.21302e-54	0.0224719101124,0.0422535211268,0.0526315789474	0.68023255814,0.772277227723,0.802395209581	-0.712516	0.0154545
Chr4_10149523_10149596	AT4G18370	+	Chr4	10149523	10149596	FALSE	U	4,3,1	175135163	50,84,55	175191160	270	135	0	0	0.011,0.011,0.003	0.125,0.18,0.147	-0.142	4,3,1	75,61,76	50,84,55	76,88,80	3.32752e-22	1.01843e-19	0.0533333333333,0.0491803278689,0.0131578947368	0.657894736842,0.954545454545,0.6875	-0.72809	0.0491749
Chr4_10779160_10779238	AT4G19860	-	Chr4	10779160	10779238	FALSE	U	18,9,25	159145172	97112120	145118162	270	135	0	0	0.054,0.03,0.068	0.251,0.322,0.27	-0.23	18,9,25	94,88,100	97112120	97102108	1.83997e-28	9.6895e-26	0.191489361702,0.102272727273,0.25	1.0,1,1	-0.818746	0.0392308
Chr4_11460168_11460244	AT4G21540	+	Chr4	11460168	11460244	FALSE	U	2,1,4	64,51,71	22,27,28	34,56,26	270	135	0	0	0.015,0.01,0.027	0.244,0.194,0.35	-0.245	2,1,4	21,19,25	22,27,28	22,23,22	2.30324e-12	2.12298e-10	0.0952380952381,0.0526315789474,0.16	1.0,1,1	-0.897377	0.0874345
Chr4_11791498_11791897	AT4G22310	+	Chr4	11791498	11791897	FALSE	U	2,0,1	504437574	57,51,68	398439415	270	135	0	0	0.002,0.0,0.001	0.067,0.055,0.076	-0.065	8,4,4	829632943	118126134	696765718	3.02817e-67	2.16875e-63	0.00965018094089,0.00632911392405,0.00424178154825	0.169540229885,0.164705882353,0.186629526462	-0.166885	0.0146875
Chr4_12009029_12009105	AT4G22890	+	Chr4	12009029	12009105	TRUE	U	47,27,44	104811931249	145237153	7721097909	270	135	0	0	0.022,0.011,0.017	0.086,0.097,0.078	-0.07	47,27,44	651658745	145237153	540670538	5.13265e-19	1.11731e-16	0.0721966205837,0.0410334346505,0.0590604026846	0.268518518519,0.353731343284,0.2843866171	-0.244782	0.058144
Chr4_12089398_12089495	AT4G23060	+	Chr4	12089398	12089495	FALSE	U	1,0,1	21,35,33	28,17,33	41,29,34	270	135	0	0	0.023,0.0,0.015	0.255,0.227,0.327	-0.257	1,0,1	12,15,19	28,17,33	19,18,20	5.55213e-13	5.51509e-11	0.0833333333333,0.0,0.0526315789474	1,0.944444444444,1	-0.93616	0.0844359
Chr4_12173400_12173485	AT4G23270	+	Chr4	12173400	12173485	FALSE	U	5,6,7	62132105	88,68,57	101,98,87	270	135	0	0	0.039,0.022,0.032	0.303,0.258,0.247	-0.238	5,6,7	28,57,45	88,68,57	54,45,39	5.21251e-30	3.1371e-27	0.178571428571,0.105263157895,0.155555555556	1,1,1	-0.853537	0.0375743
Chr4_12319312_12319404	AT4G23630	+	Chr4	12319312	12319404	FALSE	U	13,3,22	375274448	158232208	271329306	270	135	0	0	0.017,0.005,0.024	0.226,0.261,0.254	-0.232	13,3,22	148105187	158232208	149154165	3.24767e-30	1.98799e-27	0.0878378378378,0.0285714285714,0.117647058824	1,1,1	-0.921981	0.0376119
Chr4_12666033_12666113	AT4G24520	-	Chr4	12666033	12666113	FALSE	U	0,3,3	123143155	56,48,64	120,101,87	270	135	0	0	0.0,0.01,0.01	0.189,0.192,0.269	-0.21	0,3,3	85,87,111	56,48,64	83,85,81	8.03015e-32	5.52991e-29	0.0,0.0344827586207,0.027027027027	0.674698795181,0.564705882353,0.79012345679	-0.656006	0.0373333
Chr4_12792363_12792460	AT4G24820	-	Chr4	12792363	12792460	FALSE	U	7,5,4	261261333	41,41,45	290297320	270	135	0	0	0.013,0.009,0.006	0.066,0.065,0.066	-0.056	7,5,4	168120193	41,41,45	178167172	9.05128e-17	1.56203e-14	0.0416666666667,0.0416666666667,0.020725388601	0.230337078652,0.245508982036,0.261627906977	-0.211138	0.065665
Chr4_13119272_13119349	AT4G25770	-	Chr4	13119272	13119349	FALSE	U	2,0,3	48,52,79	48,56,62	43,36,42	270	135	0	0	0.02,0.0,0.019	0.358,0.437,0.425	-0.394	2,0,3	18,18,23	48,56,62	21,17,21	3.20914e-28	1.67763e-25	0.111111111111,0.0,0.130434782609	1,1,1	-0.919485	0.0394737
Chr4_13404860_13404951	AT4G26555	-	Chr4	13404860	13404951	TRUE	U	37,46,35	217230228	231192229	176181167	270	135	0	0	0.079,0.091,0.071	0.396,0.347,0.407	-0.303	37,46,35	134136152	231192229	120131109	5.63959e-31	3.63875e-28	0.276119402985,0.338235294118,0.230263157895	1,1,1	-0.718461	0.0377487
Chr4_13404998_13405078	AT4G26555	-	Chr4	13404998	13405078	FALSE	U	9,10,10	272286286	59,98,72	232225218	270	135	0	0	0.016,0.017,0.017	0.113,0.179,0.142	-0.128	9,10,10	118120134	59,98,72	105,115,96	5.49769e-21	1.45829e-18	0.0762711864407,0.0833333333333,0.0746268656716	0.561904761905,0.852173913043,0.75	-0.643282	0.0524926
Chr4_13453221_13453340	AT4G26670	+	Chr4	13453221	13453340	FALSE	U	13,15,14	322239376	127160139	251290268	270	135	0	0	0.02,0.03,0.018	0.202,0.216,0.206	-0.185	13,15,14	258220311	127160139	226245254	5.71024e-52	1.46058e-48	0.0503875968992,0.0681818181818,0.0450160771704	0.561946902655,0.65306122449,0.547244094488	-0.532889	0.0219403
Chr4_13827394_13827501	AT4G27700	-	Chr4	13827394	13827501	FALSE	U	16,15,17	277303373	42,58,62	242277211	270	135	0	0	0.028,0.024,0.022	0.08,0.095,0.128	-0.076	16,15,17	340335455	42,58,62	286377329	8.44301e-14	9.75291e-12	0.0470588235294,0.044776119403,0.0373626373626	0.146853146853,0.153846153846,0.188449848024	-0.119984	0.0785972
Chr4_13853085_13853195	AT4G27800	-	Chr4	13853085	13853195	FALSE	U	4,3,10	425489544	102126124	393410366	270	135	0	0	0.005,0.003,0.009	0.115,0.133,0.145	-0.125	4,3,10	461500558	102126124	436510442	1.70888e-58	7.1993e-55	0.00867678958785,0.006,0.0179211469534	0.233944954128,0.247058823529,0.280542986425	-0.242983	0.0170833
Chr4_13859782_13859865	AT4G27820	-	Chr4	13859782	13859865	FALSE	U	3,0,2	61,30,95	77,89,63	72,89,84	270	135	0	0	0.024,0.0,0.01	0.348,0.333,0.273	-0.307	3,0,2	52,34,74	77,89,63	89119100	1.91869e-24	7.11994e-22	0.0576923076923,0.0,0.027027027027	0.865168539326,0.747899159664,0.63	-0.719449	0.0461672
Chr4_13863990_13864199	AT4G27830	-	Chr4	13863990	13864199	FALSE	U	0,0,4	88106120	24,24,28	84,104,79	270	135	0	0	0.0,0.0,0.016	0.125,0.103,0.151	-0.121	0,0,4	139127240	31,27,35	160176172	1.02035e-18	2.16203e-16	0.0,0.0,0.0166666666667	0.19375,0.153409090909,0.203488372093	-0.177994	0.0604032
Chr4_13917241_13917342	AT4G27960	-	Chr4	13917241	13917342	TRUE	U	86,76,76	126124151	224213195	78,49,74	270	135	0	0	0.254,0.235,0.201	0.589,0.685,0.569	-0.384	86,76,76	136138183	224213195	162140151	2.79315e-12	2.54184e-10	0.632352941176,0.550724637681,0.415300546448	1,1,1	-0.467207	0.090864
Chr4_13950955_13951049	AT4G28080	-	Chr4	13950955	13951049	FALSE	U	2,3,0	394385473	42,59,87	468604563	270	135	0	0	0.003,0.004,0.0	0.043,0.047,0.072	-0.052	2,3,0	371319421	42,59,87	463532504	7.61611e-15	1.01955e-12	0.00539083557951,0.00940438871473,0.0	0.0907127429806,0.110902255639,0.172619047619	-0.119813	0.075587
Chr4_14015016_14015395	AT4G28300	+	Chr4	14015016	14015395	TRUE	U	20,22,24	111183189	90,61,91	115105122	270	135	0	0	0.083,0.057,0.06	0.281,0.225,0.272	-0.193	43,49,50	237324363	191130166	335294331	4.14762e-19	9.19654e-17	0.181434599156,0.151234567901,0.137741046832	0.570149253731,0.442176870748,0.501510574018	-0.347809	0.0591803
Chr4_14215850_14215929	AT4G28780	+	Chr4	14215850	14215929	FALSE	U	20,20,29	103,88,160	137140134	62,64,47	270	135	0	0	0.088,0.102,0.083	0.525,0.522,0.588	-0.454	20,20,29	75,46,88	137140134	66,59,63	3.08685e-40	3.87855e-37	0.266666666667,0.434782608696,0.329545454545	1,1,1	-0.656335	0.0299167
Chr4_14251427_14251522	AT4G28880	+	Chr4	14251427	14251522	FALSE	U	0,3,2	106175166	28,36,47	121129120	270	135	0	0	0.0,0.008,0.006	0.104,0.122,0.164	-0.125	0,3,2	70,81,88	28,36,47	86,97,87	2.22939e-15	3.20616e-13	0.0,0.037037037037,0.0227272727273	0.325581395349,0.371134020619,0.540229885057	-0.392394	0.0731778
Chr4_14404144_14404234	AT4G29220	-	Chr4	14404144	14404234	FALSE	U	17,2,11	365259379	79,112,89	360458352	270	135	0	0	0.023,0.004,0.014	0.099,0.109,0.112	-0.093	17,2,11	127,90,138	79,112,89	130158137	2.20388e-25	8.81785e-23	0.133858267717,0.0222222222222,0.0797101449275	0.607692307692,0.708860759494,0.649635036496	-0.576799	0.0454093
Chr4_14405394_14405466	AT4G29220	-	Chr4	14405394	14405466	FALSE	U	9,1,9	98,62,107	81,81,52	74,81,78	270	135	0	0	0.044,0.008,0.04	0.354,0.333,0.25	-0.282	9,1,9	102,72,111	81,81,52	104127110	9.56126e-14	1.09039e-11	0.0882352941176,0.0138888888889,0.0810810810811	0.778846153846,0.637795275591,0.472727272727	-0.568721	0.0800391
Chr4_14513402_14513484	AT4G29590	-	Chr4	14513402	14513484	FALSE	U	2,0,1	203163195	38,48,40	206261228	270	135	0	0	0.005,0.0,0.003	0.084,0.084,0.081	-0.08	2,0,1	58,47,54	38,48,40	62,73,67	1.22412e-22	3.81175e-20	0.0344827586207,0.0,0.0185185185185	0.612903225806,0.657534246575,0.597014925373	-0.604817	0.0501266
Chr4_14716531_14716619	AT4G30100	+	Chr4	14716531	14716619	FALSE	U	0,0,1	62,72,89	23,23,23	73,81,70	270	135	0	0	0.0,0.0,0.006	0.136,0.124,0.141	-0.132	0,0,1	36,29,50	23,23,23	45,47,42	5.63071e-16	8.84355e-14	0.0,0.0,0.02	0.511111111111,0.489361702128,0.547619047619	-0.509364	0.0714153
Chr4_14832907_14832992	AT4G30310	+	Chr4	14832907	14832992	FALSE	U	2,0,3	119137170	81,66,72	137128131	270	135	0	0	0.008,0.0,0.009	0.228,0.205,0.216	-0.211	2,0,3	83,77,102	81,66,72	93,104,89	1.19306e-35	1.01721e-32	0.0240963855422,0.0,0.0294117647059	0.870967741935,0.634615384615,0.808988764045	-0.753688	0.0369427
Chr4_14961884_14961962	AT4G30690	+	Chr4	14961884	14961962	FALSE	U	5,14,15	282402375	86,91,90	171202149	270	135	0	0	0.009,0.017,0.02	0.201,0.184,0.232	-0.19	5,14,15	146213196	86,91,90	79,120,83	1.04299e-39	1.24497e-36	0.0342465753425,0.0657276995305,0.0765306122449	1,0.758333333333,1	-0.860609	0.0297692
Chr4_15481615_15481702	AT4G32010	+	Chr4	15481615	15481702	FALSE	U	6,3,7	68,68,75	89,53,91	63,48,41	270	135	0	0	0.042,0.022,0.045	0.414,0.356,0.526	-0.396	6,3,7	21,20,25	89,53,91	30,32,29	6.99657e-13	6.85482e-11	0.285714285714,0.15,0.28	1,1,1	-0.761429	0.0887337
Chr4_15643478_15643555	AT4G32410	-	Chr4	15643478	15643555	FALSE	U	2,3,8	225218310	49,47,35	196161215	270	135	0	0	0.004,0.007,0.013	0.111,0.127,0.075	-0.096	2,3,8	184174230	49,47,35	179156160	5.18351e-22	1.5533e-19	0.0108695652174,0.0172413793103,0.0347826086957	0.27374301676,0.301282051282,0.21875	-0.243627	0.0514506
Chr4_15649407_15649689	AT4G32420	-	Chr4	15649407	15649689	FALSE	U	0,1,2	45,38,56	22,23,19	51,59,50	270	135	2.27596e-14	3.07652e-12	0.0,0.013,0.018	0.177,0.163,0.16	-0.156	0,1,2	149128177	32,31,36	191196218	1.11591e-17	2.11991e-15	0.0,0.0078125,0.0112994350282	0.167539267016,0.158163265306,0.165137614679	-0.157243	0.0906998
Chr4_15694747_15694830	AT4G32530	-	Chr4	15694747	15694830	FALSE	U	35,44,39	327322385	124120112	249293255	270	135	0	0	0.051,0.064,0.048	0.199,0.17,0.18	-0.129	35,44,39	172127193	124120112	136151135	7.43174e-17	1.29502e-14	0.203488372093,0.346456692913,0.20207253886	0.911764705882,0.794701986755,0.82962962963	-0.594693	0.0676739
Chr4_15744255_15744366	AT4G32640	+	Chr4	15744255	15744366	FALSE	U	0,0,1	43,46,64	17,21,27	45,37,38	270	135	0	0	0.0,0.0,0.008	0.159,0.221,0.262	-0.211	0,0,1	41,34,48	17,21,27	41,43,40	7.94286e-15	1.06131e-12	0.0,0.0,0.0208333333333	0.414634146341,0.488372093023,0.675	-0.519058	0.0766526
Chr4_16156328_16156420	AT4G33630	+	Chr4	16156328	16156420	FALSE	U	4,1,3	106110148	94,98,97	110152133	270	135	0	0	0.019,0.005,0.01	0.299,0.244,0.267	-0.259	4,1,3	85,89,109	94,98,97	133141127	3.95625e-43	5.90297e-40	0.0470588235294,0.0112359550562,0.0275229357798	0.706766917293,0.695035460993,0.763779527559	-0.693255	0.0290654
Chr4_16156741_16156987	AT4G33630	+	Chr4	16156741	16156987	FALSE	U	11,13,14	124148141	122117124	173196127	270	135	0	0	0.042,0.042,0.047	0.261,0.23,0.328	-0.229	13,14,17	227237291	138144145	354374337	1.03224e-38	1.13735e-35	0.057268722467,0.0590717299578,0.0584192439863	0.389830508475,0.385026737968,0.430267062315	-0.343455	0.0315714
Chr4_16177133_16177205	AT4G33700	-	Chr4	16177133	16177205	FALSE	I	13,4,23	93,79,138	73,101,74	93,89,108	270	135	0	0	0.065,0.025,0.077	0.282,0.362,0.255	-0.244	13,4,23	63,39,72	73,101,74	66,74,75	1.07445e-12	1.03013e-10	0.206349206349,0.102564102564,0.319444444444	1,1,0.986666666667	-0.786103	0.0908592
Chr4_16273118_16273201	AT4G33950	+	Chr4	16273118	16273201	FALSE	U	0,0,0	51,50,59	33,16,27	81,62,53	270	135	0	0	0.0,0.0,0.0	0.169,0.114,0.203	-0.162	0,0,0	20,28,31	33,16,27	48,37,39	1.17309e-13	1.32516e-11	0.0,0.0,0.0	0.6875,0.432432432432,0.692307692308	-0.60408	0.0825626
Chr4_16943882_16944161	AT4G35760	-	Chr4	16943882	16944161	FALSE	U	5,3,5	142,89,166	90,86,74	105130110	270	135	0	0	0.017,0.017,0.015	0.3,0.249,0.252	-0.251	6,6,9	299197316	127113109	268351314	1.87016e-29	1.07151e-26	0.0200668896321,0.0304568527919,0.0284810126582	0.473880597015,0.321937321937,0.347133757962	-0.354649	0.039163
Chr4_16999120_16999229	AT4G35890	+	Chr4	16999120	16999229	FALSE	U	5,2,10	98,48,112	59,53,58	51,77,50	270	135	0	0	0.025,0.02,0.043	0.366,0.256,0.367	-0.3	5,2,10	64,45,79	59,53,58	55,71,59	2.48645e-20	6.24831e-18	0.078125,0.0444444444444,0.126582278481	1,0.746478873239,0.983050847458	-0.826793	0.0569859
Chr4_17229952_17230082	AT4G36515	-	Chr4	17229952	17230082	FALSE	U	26,27,40	89,110,92	72,77,79	45,59,51	270	135	0	0	0.127,0.109,0.179	0.444,0.395,0.436	-0.287	26,27,40	54,60,64	72,77,79	28,42,33	8.56874e-12	7.21134e-10	0.481481481481,0.45,0.625	1,1,1	-0.481173	0.0982902
Chr4_17309940_17310046	AT4G36730	-	Chr4	17309940	17310046	FALSE	U	4,4,5	113301126	51,30,30	255133135	270	135	0	0	0.017,0.007,0.019	0.091,0.101,0.1	-0.083	4,4,5	74,184,96	51,30,30	172,82,92	6.13764e-16	9.59763e-14	0.0540540540541,0.0217391304348,0.0520833333333	0.296511627907,0.365853658537,0.326086956522	-0.286859	0.0726411
Chr4_18090605_18090711	AT4G38760	-	Chr4	18090605	18090711	FALSE	U	1,0,0	45,49,57	56,36,39	52,48,39	270	135	0	0	0.011,0.0,0.0	0.35,0.273,0.333	-0.315	1,0,0	31,28,39	56,36,39	39,41,40	1.44332e-18	2.99621e-16	0.0322580645161,0.0,0.0	1,0.878048780488,0.975	-0.940264	0.0631538
Chr4_18513612_18514022	AT4G39910	-	Chr4	18513612	18514022	FALSE	U	3,5,8	76,74,73	44,49,56	78,65,78	270	135	0	0	0.019,0.033,0.052	0.22,0.274,0.264	-0.218	8,7,18	168189210	101,98,108	298250249	1.15376e-21	3.3454e-19	0.047619047619,0.037037037037,0.0857142857143	0.338926174497,0.392,0.433734939759	-0.33143	0.0525364
Chr4_202550_202632	AT4G00450	+	Chr4	202550	202632	FALSE	U	0,0,0	27,26,31	18,22,22	11,25,15	270	135	0	0	0.0,0.0,0.0	0.45,0.306,0.423	-0.393	0,0,0	24,22,28	18,22,22	28,30,29	6.15921e-16	9.61039e-14	0.0,0.0,0.0	0.642857142857,0.733333333333,0.758620689655	-0.711604	0.0659459
Chr4_2117055_2118002	AT4G04330	-	Chr4	2117055	2118002	FALSE	U	72150110	478611641	162162142	274389310	270	135	7.77156e-16	1.31757e-13	0.07,0.109,0.079	0.228,0.172,0.186	-0.109	362648532	327344644513	588737618	238428892500	7.64735e-21	2.00621e-18	0.110601894287,0.145161290323,0.117881675161	0.246644295302,0.255105572863,0.2472	-0.125102	0.0688551
Chr4_2454819_2455008	AT4G04850	+	Chr4	2454819	2455008	FALSE	U	10,5,3	66109110	84,91,70	125129120	270	135	0	0	0.07,0.022,0.013	0.251,0.261,0.226	-0.211	11,6,5	107115144	97,102,84	206241196	5.72018e-24	2.03818e-21	0.102803738318,0.0521739130435,0.0347222222222	0.470873786408,0.423236514523,0.428571428571	-0.377661	0.0451786
Chr4_6294884_6294960	AT4G10060	+	Chr4	6294884	6294960	FALSE	U	19,13,12	295284328	64,84,66	269321270	270	135	0	0	0.031,0.022,0.018	0.106,0.116,0.109	-0.087	19,13,12	71,63,84	64,84,66	76,89,76	2.10272e-17	3.91155e-15	0.267605633803,0.206349206349,0.142857142857	0.842105263158,0.943820224719,0.868421052632	-0.679178	0.0613867
Chr4_6299451_6299593	AT4G10070	-	Chr4	6299451	6299593	FALSE	U	0,1,1	27,33,27	25,26,25	24,26,27	270	135	0	0	0.0,0.015,0.018	0.342,0.333,0.316	-0.319	0,1,1	25,19,22	25,26,25	43,38,40	8.74144e-11	6.31102e-09	0.0,0.0526315789474,0.0454545454545	0.581395348837,0.684210526316,0.625	-0.597507	0.0974826
Chr4_6310698_6310775	AT4G10110	-	Chr4	6310698	6310775	FALSE	U	1,0,2	35,61,32	34,24,16	52,31,41	270	135	0	0	0.014,0.0,0.03	0.246,0.279,0.163	-0.215	1,0,2	25,34,30	34,24,16	39,35,32	3.47315e-11	2.68621e-09	0.04,0.0,0.0666666666667	0.871794871795,0.685714285714,0.5	-0.650281	0.0945438
Chr4_6851830_6851915	AT4G11260	-	Chr4	6851830	6851915	FALSE	U	5,2,4	182173239	78,79,76	177189202	270	135	0	0	0.014,0.006,0.008	0.181,0.173,0.158	-0.161	5,2,4	110,94,132	78,79,76	114116113	1.19202e-41	1.70743e-38	0.0454545454545,0.0212765957447,0.030303030303	0.684210526316,0.681034482759,0.672566371681	-0.646926	0.0289474
Chr4_7211123_7211212	AT4G12030	+	Chr4	7211123	7211212	FALSE	U	4,1,4	64,37,118	21,46,50	71,111,95	270	135	0	0	0.03,0.013,0.017	0.129,0.172,0.208	-0.15	4,1,4	33,17,53	21,46,50	42,59,52	3.73949e-12	3.33108e-10	0.121212121212,0.0588235294118,0.0754716981132	0.5,0.779661016949,0.961538461538	-0.661897	0.0867917
Chr4_775639_775714	AT4G01800	-	Chr4	775639	775714	FALSE	U	1,3,1	162180217	32,26,22	164176143	270	135	0	0	0.003,0.008,0.002	0.089,0.069,0.071	-0.072	1,3,1	151149179	32,26,22	145168150	1.15517e-14	1.50971e-12	0.00662251655629,0.0201342281879,0.00558659217877	0.220689655172,0.154761904762,0.146666666667	-0.163258	0.0723077
Chr4_814467_814540	AT4G01883	+	Chr4	814467	814540	TRUE	U	3,3,9	56,58,83	40,86,58	58,70,53	270	135	0	0	0.026,0.025,0.051	0.256,0.381,0.354	-0.296	3,3,9	36,35,45	40,86,58	46,49,42	1.10339e-10	7.83964e-09	0.0833333333333,0.0857142857143,0.2	0.869565217391,1,1	-0.833506	0.097799
Chr4_8260085_8260629	AT4G14350	-	Chr4	8260085	8260629	FALSE	EI	0,0,0	36,55,41	16,14,8	63,29,33	270	135	2.45515e-12	2.41338e-10	0.0,0.0,0.0	0.113,0.194,0.108	-0.138	0,0,2	181270254	47,44,40	356266297	7.01825e-24	2.46392e-21	0.0,0.0,0.00787401574803	0.13202247191,0.165413533835,0.13468013468	-0.141414	0.077314
Chr4_8631430_8631496	AT4G15110	-	Chr4	8631430	8631496	FALSE	U	5,7,12	257147250	91,110,74	177189153	270	135	0	0	0.01,0.023,0.023	0.204,0.225,0.195	-0.189	5,7,12	90,70,102	91,110,74	86,97,87	4.97597e-29	2.78508e-26	0.0555555555556,0.1,0.117647058824	1,1,0.850574712644	-0.859124	0.0371905
Chr4_8983338_8983436	AT4G15790	+	Chr4	8983338	8983436	TRUE	U	3,7,14	74,79,97	228201237	57,46,51	270	135	0	0	0.02,0.042,0.067	0.667,0.686,0.699	-0.641	3,7,14	45,37,50	228201237	83,79,84	8.11173e-57	2.76645e-53	0.0666666666667,0.189189189189,0.28	1,1,1	-0.821381	0.0178571
Chr4_9156303_9156426	AT4G16155	-	Chr4	9156303	9156426	FALSE	U	0,0,1	164160185	24,32,18	126135149	270	135	0	0	0.0,0.0,0.003	0.087,0.106,0.057	-0.082	0,0,1	148127162	24,32,18	129120129	2.75128e-15	3.8712e-13	0.0,0.0,0.00617283950617	0.186046511628,0.266666666667,0.139534883721	-0.195358	0.0711927
Chr4_9634372_9634465	AT4G17140	-	Chr4	9634372	9634465	FALSE	U	0,0,0	80,61,90	12,9,8	19,27,20	270	135	2.22045e-16	3.93586e-14	0.0,0.0,0.0	0.24,0.143,0.167	-0.183	0,0,0	53,43,65	12,9,8	21,22,20	8.802e-15	1.16523e-12	0.0,0.0,0.0	0.571428571429,0.409090909091,0.4	-0.460173	0.0948668
Chr4_9690645_9690804	AT4G17330	-	Chr4	9690645	9690804	FALSE	U	11,4,17	114,96,132	98108103	111120102	270	135	0	0	0.046,0.02,0.06	0.306,0.31,0.336	-0.275	11,4,17	108,97,133	104115108	111118106	2.20716e-45	3.67615e-42	0.101851851852,0.0412371134021,0.127819548872	0.936936936937,0.974576271186,1	-0.880202	0.0266279
Chr4_987058_987139	AT4G02260	+	Chr4	987058	987139	FALSE	U	2,0,1	140129162	36,27,25	140164142	270	135	0	0	0.007,0.0,0.003	0.114,0.076,0.081	-0.087	2,0,1	86,77,96	36,27,25	95115103	4.22633e-13	4.28733e-11	0.0232558139535,0.0,0.0104166666667	0.378947368421,0.234782608696,0.242718446602	-0.274259	0.0800197
Chr4_9938968_9939038	AT4G17890	+	Chr4	9938968	9939038	TRUE	U	7,8,3	61,50,65	47,39,47	40,43,43	270	135	0	0	0.054,0.074,0.023	0.37,0.312,0.353	-0.295	7,8,3	27,27,30	47,39,47	31,30,35	4.02465e-16	6.43396e-14	0.259259259259,0.296296296296,0.1	1,1,1	-0.781481	0.0671429
Chr5_13109341_13109426	AT5G34850	-	Chr5	13109341	13109426	FALSE	U	4,0,1	258257320	45,77,39	283295323	270	135	0	0	0.008,0.0,0.002	0.074,0.115,0.057	-0.079	4,0,1	117102147	45,77,39	131147137	2.56829e-14	3.16589e-12	0.034188034188,0.0,0.00680272108844	0.343511450382,0.52380952381,0.284671532847	-0.370334	0.0865977
Chr5_1313356_1313425	AT5G04560	+	Chr5	1313356	1313425	FALSE	U	2,0,0	41,28,61	31,18,32	42,27,40	270	135	0	0	0.024,0.0,0.0	0.27,0.25,0.286	-0.261	2,0,0	19,22,23	31,18,32	23,20,20	1.86542e-14	2.36475e-12	0.105263157895,0.0,0.0	1,0.9,1	-0.931579	0.079901
Chr5_13421509_13421599	AT5G35170	+	Chr5	13421509	13421599	FALSE	U	42,41,33	401409471	59,79,58	122172149	270	135	0	0	0.05,0.048,0.034	0.195,0.187,0.163	-0.138	42,41,33	296305336	59,79,58	144185155	6.89708e-16	1.06918e-13	0.141891891892,0.134426229508,0.0982142857143	0.409722222222,0.427027027027,0.374193548387	-0.278803	0.0774897
Chr5_13423266_13423347	AT5G35170	+	Chr5	13423266	13423347	FALSE	U	40,34,36	703820785	70,71,56	357464404	270	135	1.11022e-16	2.00623e-14	0.028,0.02,0.022	0.089,0.071,0.065	-0.052	40,34,36	266274303	70,71,56	129167140	1.06771e-15	1.62353e-13	0.15037593985,0.124087591241,0.118811881188	0.542635658915,0.425149700599,0.4	-0.324837	0.0864583
Chr5_13428576_13429001	AT5G35180	+	Chr5	13428576	13429001	FALSE	EI	0,0,2	166111159	17,28,28	137150165	270	135	1.11022e-16	2.00623e-14	0.0,0.0,0.006	0.058,0.085,0.078	-0.072	0,0,4	331260366	29,51,54	324359334	1.79363e-14	2.2898e-12	0.0,0.0,0.0109289617486	0.0895061728395,0.142061281337,0.161676646707	-0.127438	0.0957699
Chr5_13712075_13712162	AT5G35530	-	Chr5	13712075	13712162	FALSE	U	2,0,2	247184277	58,49,41	283256317	270	135	0	0	0.004,0.0,0.004	0.093,0.087,0.061	-0.078	2,0,2	286214317	58,49,41	322298356	1.10826e-20	2.8758e-18	0.00699300699301,0.0,0.00630914826498	0.180124223602,0.164429530201,0.115168539326	-0.148807	0.0612929
Chr5_13743553_13743632	AT5G35560	-	Chr5	13743553	13743632	FALSE	U	0,0,2	47,41,36	18,35,31	48,53,49	270	135	0	0	0.0,0.0,0.027	0.158,0.248,0.24	-0.206	0,0,2	24,25,30	18,35,31	29,33,32	6.17675e-14	7.25201e-12	0.0,0.0,0.0666666666667	0.620689655172,1,0.96875	-0.840924	0.0900738
Chr5_1391697_1391771	AT5G04810	+	Chr5	1391697	1391771	FALSE	U	0,1,0	206193209	23,31,32	236206196	270	135	0	0	0.0,0.003,0.0	0.046,0.07,0.075	-0.063	0,1,0	82,73,92	23,31,32	86,90,90	9.95736e-20	2.33051e-17	0.0,0.013698630137,0.0	0.267441860465,0.344444444444,0.355555555556	-0.317914	0.0610188
Chr5_13957126_13957198	AT5G35790	-	Chr5	13957126	13957198	FALSE	U	9,11,8	207216255	65,84,74	264278264	270	135	0	0	0.021,0.025,0.015	0.11,0.131,0.123	-0.101	9,11,8	109113126	65,84,74	128140142	2.46832e-23	8.37812e-21	0.0825688073394,0.0973451327434,0.0634920634921	0.5078125,0.6,0.521126760563	-0.461844	0.0526901
Chr5_14132841_14132940	AT5G35980	+	Chr5	14132841	14132940	FALSE	U	0,1,2	90,90,122	55,57,70	75,53,87	270	135	0	0	0.0,0.006,0.008	0.268,0.35,0.287	-0.297	0,1,2	52,56,78	55,57,70	56,62,57	1.65426e-36	1.51893e-33	0.0,0.0178571428571,0.025641025641	0.982142857143,0.91935483871,1	-0.952667	0.0376404
Chr5_14252860_14252934	AT5G36210	-	Chr5	14252860	14252934	FALSE	U	2,0,0	88,86,92	24,34,49	102,88,74	270	135	0	0	0.011,0.0,0.0	0.105,0.162,0.249	-0.168	2,0,0	41,35,43	24,34,49	45,45,43	3.59577e-13	3.68948e-11	0.0487804878049,0.0,0.0	0.533333333333,0.755555555556,1	-0.746703	0.0976963
Chr5_1494754_1494828	AT5G05060	-	Chr5	1494754	1494828	FALSE	U	3,2,3	124141126	57,43,45	174172163	270	135	0	0	0.012,0.007,0.012	0.141,0.111,0.121	-0.114	3,2,3	57,54,62	57,43,45	88,92,85	9.93209e-17	1.69363e-14	0.0526315789474,0.037037037037,0.0483870967742	0.647727272727,0.467391304348,0.529411764706	-0.502158	0.0714815
Chr5_15418860_15419099	AT5G38510	-	Chr5	15418860	15419099	FALSE	U	54,22,58	129119136	227255253	92,119,88	270	135	0	0	0.173,0.085,0.176	0.552,0.517,0.59	-0.408	57,23,66	276240342	299330348	328424376	1.47575e-15	2.16581e-13	0.20652173913,0.0958333333333,0.19298245614	0.911585365854,0.778301886792,0.925531914894	-0.706694	0.0799205
Chr5_1545597_1545666	AT5G05200	-	Chr5	1545597	1545666	FALSE	U	23,19,29	412510514	67,115,82	303341317	270	135	0	0	0.027,0.018,0.027	0.1,0.144,0.115	-0.096	23,19,29	208211247	67,115,82	168180156	2.98276e-15	4.17232e-13	0.110576923077,0.0900473933649,0.117408906883	0.39880952381,0.638888888889,0.525641025641	-0.415102	0.076971
Chr5_15944319_15944411	AT5G39830	+	Chr5	15944319	15944411	FALSE	U	43,38,35	243230264	124186174	156188156	270	135	0	0	0.081,0.076,0.062	0.284,0.331,0.358	-0.251	43,38,35	141120155	124186174	111143112	2.40745e-21	6.81498e-19	0.304964539007,0.316666666667,0.225806451613	1,1,1	-0.717521	0.0593425
Chr5_16071006_16071305	AT5G40200	+	Chr5	16071006	16071305	FALSE	U	2,1,0	41,33,61	27,28,28	59,57,47	270	135	0	0	0.024,0.015,0.0	0.186,0.197,0.23	-0.191	5,2,0	115,85,139	51,46,40	162140154	4.53988e-19	1.00352e-16	0.0434782608696,0.0235294117647,0.0	0.314814814815,0.328571428571,0.25974025974	-0.278706	0.0669756
Chr5_16102721_16102816	AT5G40280	+	Chr5	16102721	16102816	TRUE	U	2,2,4	27,20,40	38,36,38	21,22,21	270	135	0	0	0.036,0.048,0.048	0.475,0.45,0.475	-0.423	2,2,4	21,18,23	38,36,38	35,31,29	2.53906e-13	2.67813e-11	0.0952380952381,0.111111111111,0.173913043478	1,1,1	-0.873246	0.096042
Chr5_16265401_16265482	AT5G40610	-	Chr5	16265401	16265482	FALSE	U	2,0,1	69,51,68	31,33,27	84,75,64	270	135	0	0	0.014,0.0,0.007	0.156,0.18,0.174	-0.163	2,0,1	33,25,37	31,33,27	47,40,38	2.82197e-15	3.96287e-13	0.0606060606061,0.0,0.027027027027	0.659574468085,0.825,0.710526315789	-0.702489	0.0817021
Chr5_16539814_16539912	AT5G41340	-	Chr5	16539814	16539912	FALSE	U	4,3,3	71,104,96	86,89,76	63,57,54	270	135	0	0	0.027,0.014,0.015	0.406,0.438,0.413	-0.4	4,3,3	62,73,71	86,89,76	79,86,76	1.03289e-37	9.99661e-35	0.0645161290323,0.041095890411,0.0422535211268	1,1,1.0	-0.950711	0.0375581
Chr5_16759852_16759932	AT5G41870	-	Chr5	16759852	16759932	FALSE	U	7,3,8	37,38,53	75,56,66	11,30,27	270	135	0	0	0.086,0.038,0.07	0.773,0.483,0.55	-0.537	7,3,8	21,17,24	75,56,66	18,21,20	4.33723e-21	1.1634e-18	0.333333333333,0.176470588235,0.333333333333	1,1,1	-0.718954	0.0615508
Chr5_1694209_1694300	AT5G05660	-	Chr5	1694209	1694300	FALSE	U	1,6,3	52,33,34	41,56,42	38,30,24	270	135	0	0	0.01,0.083,0.042	0.35,0.483,0.467	-0.388	1,6,3	26,23,27	41,56,42	32,30,30	4.16175e-15	5.69906e-13	0.0384615384615,0.260869565217,0.111111111111	1,1,1	-0.863186	0.0773265
Chr5_17613801_17613885	AT5G43810	+	Chr5	17613801	17613885	FALSE	U	2,0,1	65,42,52	40,43,59	32,38,34	270	135	0	0	0.015,0.0,0.01	0.385,0.361,0.465	-0.395	2,0,1	37,31,43	40,43,59	33,39,41	6.89161e-29	3.82613e-26	0.0540540540541,0.0,0.0232558139535	1,1,1	-0.97423	0.0433333
Chr5_17628582_17628797	AT5G43850	-	Chr5	17628582	17628797	FALSE	U	8,1,4	202258259	42,56,59	213239221	270	135	0	0	0.019,0.002,0.008	0.09,0.105,0.118	-0.095	8,3,6	205220265	52,75,67	241294239	1.15388e-24	4.32669e-22	0.0390243902439,0.0136363636364,0.022641509434	0.215767634855,0.255102040816,0.280334728033	-0.225301	0.0512232
Chr5_1800023_1800108	AT5G05980	-	Chr5	1800023	1800108	FALSE	U	1,0,1	32,49,63	35,45,56	46,42,50	270	135	0	0	0.015,0.0,0.008	0.276,0.349,0.359	-0.32	1,0,1	27,27,31	35,45,56	34,35,37	3.86627e-22	1.1733e-19	0.037037037037,0.0,0.0322580645161	1,1,1	-0.976902	0.0525294
Chr5_18014061_18014530	AT5G44650	+	Chr5	18014061	18014530	FALSE	U	6,7,10	330201287	59,75,73	230328329	270	135	0	0	0.009,0.017,0.017	0.114,0.103,0.1	-0.091	14,16,17	12458201249	155170162	112513571311	4.60865e-53	1.22247e-49	0.0112449799197,0.019512195122,0.013610888711	0.137777777778,0.125276344878,0.12356979405	-0.114085	0.0245122
Chr5_18174134_18174217	AT5G06695,AT5G45030	+,+	Chr5	18174134	18174217	FALSE	U	0,0,0	32,22,37	24,22,32	21,25,25	270	135	0	0	0.0,0.0,0.0	0.364,0.306,0.39	-0.353	0,0,0	21,11,22	24,22,32	18,18,19	4.26532e-21	1.14841e-18	0.0,0.0,0.0	1,1,1	-1	0.0612336
Chr5_18720540_18720652	AT5G46180	-	Chr5	18720540	18720652	FALSE	U	2,2,3	60,52,76	37,34,33	46,50,43	270	135	0	0	0.016,0.019,0.019	0.287,0.254,0.277	-0.255	2,2,3	39,34,51	37,34,33	41,45,42	5.69866e-18	1.10009e-15	0.0512820512821,0.0588235294118,0.0588235294118	0.90243902439,0.755555555556,0.785714285714	-0.75826	0.0728153
Chr5_18833302_18833414	AT5G46430	+	Chr5	18833302	18833414	FALSE	I	100,70,150	81,61,100	815831841	55,72,49	270	135	0	0	0.382,0.365,0.429	0.881,0.852,0.896	-0.484	100,70,150	143610451525	815831841	124212571417	1.52732e-49	3.12529e-46	0.0696378830084,0.066985645933,0.0983606557377	0.656199677939,0.661097852029,0.593507410021	-0.558607	0.0287879
Chr5_18833302_18833418	AT5G46430	+	Chr5	18833302	18833418	FALSE	EI	101,73,153	710522719	826839854	497446510	270	135	0	0	0.066,0.065,0.096	0.454,0.485,0.456	-0.389	101,73,153	148710811580	826839854	128613011467	1.03496e-51	2.47077e-48	0.0679219905851,0.0675300647549,0.096835443038	0.642301710731,0.644888547271,0.582140422631	-0.545681	0.0269412
Chr5_1904506_1904591	AT5G06260	-	Chr5	1904506	1904591	TRUE	I	1,1,1	32,51,60	20,23,25	45,36,41	270	135	0	0	0.015,0.01,0.008	0.182,0.242,0.234	-0.208	1,1,1	30,24,34	20,23,25	34,34,37	8.02225e-13	7.78517e-11	0.0333333333333,0.0416666666667,0.0294117647059	0.588235294118,0.676470588235,0.675675675676	-0.61199	0.0944265
Chr5_19077938_19078032	AT5G47010	+	Chr5	19077938	19078032	FALSE	U	2,0,0	120,73,120	24,22,34	90123113	270	135	0	0	0.008,0.0,0.0	0.118,0.082,0.131	-0.108	2,0,0	75,56,84	24,22,34	71,80,79	7.10325e-16	1.09876e-13	0.0266666666667,0.0,0.0	0.338028169014,0.275,0.430379746835	-0.338914	0.0793413
Chr5_19094125_19094213	AT5G47040	-	Chr5	19094125	19094213	FALSE	U	6,7,3	237287313	103153131	334394418	270	135	0	0	0.013,0.012,0.005	0.134,0.163,0.135	-0.134	6,7,3	111123140	103153131	161182172	2.12678e-38	2.2734e-35	0.0540540540541,0.0569105691057,0.0214285714286	0.639751552795,0.840659340659,0.761627906977	-0.703215	0.0361212
Chr5_19096020_19096104	AT5G47040	-	Chr5	19096020	19096104	FALSE	U	0,0,3	208236243	42,38,39	277286314	270	135	0	0	0.0,0.0,0.006	0.07,0.062,0.058	-0.061	0,0,3	106117134	42,38,39	154174164	6.11958e-20	1.46093e-17	0.0,0.0,0.0223880597015	0.272727272727,0.218390804598,0.237804878049	-0.235512	0.0656436
Chr5_19559745_19559825	AT5G48240	+	Chr5	19559745	19559825	FALSE	U	1,0,0	32,26,37	22,25,24	46,43,39	270	135	4.44089e-16	7.68001e-14	0.015,0.0,0.0	0.193,0.225,0.235	-0.213	1,0,0	25,19,27	22,25,24	35,31,35	2.51249e-14	3.10781e-12	0.04,0.0,0.0	0.628571428571,0.806451612903,0.685714285714	-0.693579	0.0996239
Chr5_19772219_19772414	AT5G48760	-	Chr5	19772219	19772414	FALSE	U	9,7,7	289193315	71,69,70	286289338	270	135	0	0	0.015,0.018,0.011	0.11,0.107,0.094	-0.089	11,8,7	415275459	82,78,86	457466529	4.04762e-26	1.7153e-23	0.0265060240964,0.0290909090909,0.0152505446623	0.17943107221,0.167381974249,0.162570888469	-0.146179	0.0496753
Chr5_19816284_19816370	AT5G48880	-	Chr5	19816284	19816370	FALSE	U	1,0,7	93,59,128	56,62,70	214190224	270	135	0	0	0.005,0.0,0.027	0.116,0.14,0.135	-0.12	1,0,7	56,39,89	56,62,70	130119137	1.40697e-16	2.34885e-14	0.0178571428571,0.0,0.0786516853933	0.430769230769,0.521008403361,0.510948905109	-0.455406	0.077131
Chr5_20251467_20251680	AT5G49830	-	Chr5	20251467	20251680	FALSE	U	2,3,1	86,78,111	30,30,15	71,58,75	270	135	0	0	0.011,0.019,0.004	0.174,0.205,0.091	-0.145	2,3,1	91,84,119	34,32,19	106,108,94	1.28073e-13	1.4332e-11	0.021978021978,0.0357142857143,0.00840336134454	0.320754716981,0.296296296296,0.202127659574	-0.251028	0.0956007
Chr5_20654260_20654348	AT5G50780	+	Chr5	20654260	20654348	FALSE	U	0,1,0	19,18,23	41,23,33	25,21,20	270	135	0	0	0.0,0.027,0.0	0.451,0.354,0.452	-0.41	0,1,0	8,8,14	41,23,33	13,12,15	1.46044e-15	2.15217e-13	0.0,0.125,0.0	1,1,1	-0.958333	0.0812791
Chr5_20729851_20729934	AT5G50950	+	Chr5	20729851	20729934	FALSE	U	13,11,26	323237410	83,89,83	162148183	270	135	0	0	0.02,0.023,0.031	0.204,0.231,0.185	-0.182	13,11,26	143,97,187	83,89,83	80,80,90	2.10478e-40	2.69182e-37	0.0909090909091,0.113402061856,0.139037433155	1,1,0.922222222222	-0.859625	0.0332653
Chr5_20744824_20744915	AT5G51010	+	Chr5	20744824	20744915	FALSE	U	3,4,1	386257415	52,69,60	428376480	270	135	0	0	0.004,0.008,0.001	0.057,0.084,0.059	-0.062	3,4,1	211138246	52,69,60	250232278	1.08782e-23	3.7637e-21	0.0142180094787,0.0289855072464,0.00406504065041	0.208,0.297413793103,0.215827338129	-0.224658	0.053908
Chr5_20751550_20751643	AT5G51040	+	Chr5	20751550	20751643	FALSE	U	2,2,3	178143246	30,41,28	189243217	270	135	0	0	0.006,0.007,0.006	0.074,0.078,0.061	-0.065	2,2,3	95,58,110	30,41,28	99133106	2.08871e-14	2.62441e-12	0.0210526315789,0.0344827586207,0.0272727272727	0.30303030303,0.308270676692,0.264150943396	-0.264215	0.0897778
Chr5_20889829_20889923	AT5G51430	-	Chr5	20889829	20889923	FALSE	U	6,0,4	78,74,78	49,45,69	75,67,77	270	135	0	0	0.037,0.0,0.025	0.246,0.251,0.309	-0.248	6,0,4	39,33,45	49,45,69	44,42,44	3.77062e-18	7.52223e-16	0.153846153846,0.0,0.0888888888889	1,1,1	-0.919088	0.0721995
Chr5_21645244_21645344	AT5G53350	+	Chr5	21645244	21645344	FALSE	U	21,11,21	265198272	69,71,72	258264226	270	135	3.33067e-16	5.81836e-14	0.038,0.027,0.037	0.118,0.119,0.137	-0.091	21,11,21	147126173	69,71,72	156178160	4.51292e-15	6.1564e-13	0.142857142857,0.0873015873016,0.121387283237	0.442307692308,0.398876404494,0.45	-0.313213	0.094625
Chr5_21689507_21689587	AT5G53450	+	Chr5	21689507	21689587	FALSE	U	13,6,5	556329233	40,113,52	217505277	270	135	0	0	0.012,0.009,0.011	0.084,0.101,0.086	-0.08	13,6,5	323187129	40,113,52	142322164	7.51611e-26	3.12963e-23	0.0402476780186,0.0320855614973,0.0387596899225	0.281690140845,0.350931677019,0.317073170732	-0.279534	0.0500637
Chr5_21862287_21862363	AT5G53850	-	Chr5	21862287	21862363	FALSE	U	0,0,0	128123134	17,26,44	130141138	270	135	0	0	0.0,0.0,0.0	0.061,0.084,0.138	-0.094	0,0,0	78,71,86	17,26,44	79,82,87	1.59266e-13	1.75755e-11	0.0,0.0,0.0	0.215189873418,0.317073170732,0.505747126437	-0.346003	0.0968182
Chr5_22125146_22125674	AT5G54500	+	Chr5	22125146	22125674	FALSE	U	8,3,14	266414408	77,66,78	225215194	270	135	0	0	0.015,0.004,0.017	0.146,0.133,0.167	-0.137	30,37,48	96412281385	211180219	968825786	7.98956e-48	1.43051e-44	0.0311203319502,0.0301302931596,0.0346570397112	0.217975206612,0.218181818182,0.278625954198	-0.206292	0.0292241
Chr5_22398191_22398284	AT5G55220	+	Chr5	22398191	22398284	FALSE	U	12,16,10	406376392	52,53,46	274331274	270	135	0	0	0.015,0.021,0.013	0.087,0.074,0.077	-0.063	12,16,10	241191244	52,53,46	172188161	2.30269e-18	4.7119e-16	0.0497925311203,0.0837696335079,0.0409836065574	0.302325581395,0.281914893617,0.285714285714	-0.231803	0.0718493
Chr5_226006_226095	AT5G01590	+	Chr5	226006	226095	FALSE	U	4,3,5	314207325	31,45,41	250332265	270	135	0	0	0.006,0.007,0.008	0.058,0.063,0.072	-0.057	4,3,5	184149186	31,45,41	176199180	4.43431e-17	7.95942e-15	0.0217391304348,0.0201342281879,0.0268817204301	0.176136363636,0.226130653266,0.227777777778	-0.187097	0.0686698
Chr5_22681978_22682076	AT5G56010	+	Chr5	22681978	22682076	FALSE	U	4,2,7	469110661	40,37,39	304318348	270	135	0	0	0.004,0.009,0.005	0.062,0.055,0.053	-0.051	4,2,7	452126635	40,37,39	330337372	1.6428e-20	4.15745e-18	0.00884955752212,0.015873015873,0.0110236220472	0.121212121212,0.109792284866,0.104838709677	-0.100032	0.064598
Chr5_2296039_2296133	AT5G07290	+	Chr5	2296039	2296133	FALSE	U	0,0,0	50,35,42	23,33,23	38,37,35	270	135	0	0	0.0,0.0,0.0	0.232,0.308,0.247	-0.262	0,0,0	29,30,35	23,33,23	37,35,35	4.82773e-18	9.42117e-16	0.0,0.0,0.0	0.621621621622,0.942857142857,0.657142857143	-0.740541	0.0668127
Chr5_23515437_23515523	AT5G58110	+	Chr5	23515437	23515523	FALSE	U	0,0,5	138134172	51,55,49	133130164	270	135	0	0	0.0,0.0,0.014	0.161,0.175,0.13	-0.151	0,0,5	92,81,113	51,55,49	103100103	6.99004e-28	3.55049e-25	0.0,0.0,0.0442477876106	0.495145631068,0.55,0.47572815534	-0.492209	0.04625
Chr5_23525280_23525402	AT5G58140	+	Chr5	23525280	23525402	FALSE	U	0,2,5	220181283	43,40,42	320363373	270	135	1.11022e-16	2.00623e-14	0.0,0.005,0.009	0.063,0.052,0.053	-0.051	0,2,5	217174259	43,40,42	321351344	7.58104e-16	1.16512e-13	0.0,0.0114942528736,0.019305019305	0.133956386293,0.11396011396,0.122093023256	-0.11307	0.0860152
Chr5_23527181_23527266	AT5G58140	+	Chr5	23527181	23527266	FALSE	U	1,0,0	400346491	88,103,99	583673649	270	135	0	0	0.001,0.0,0.0	0.07,0.071,0.071	-0.07	1,0,0	151122181	88,103,99	224245240	4.40956e-50	9.86902e-47	0.00662251655629,0.0,0.0	0.392857142857,0.420408163265,0.4125	-0.406381	0.0288043
Chr5_23529369_23529452	AT5G58140	+	Chr5	23529369	23529452	FALSE	E	21,5,14	317251305	145200173	399458395	270	135	0	0	0.032,0.01,0.022	0.154,0.179,0.18	-0.15	21,5,14	142118172	145200173	214230227	2.14685e-25	8.65911e-23	0.147887323944,0.0423728813559,0.0813953488372	0.677570093458,0.869565217391,0.762114537445	-0.679198	0.0510526
Chr5_23881112_23881386	AT5G59160	+	Chr5	23881112	23881386	TRUE	EI	11,6,15	179168209	66,66,81	183185183	270	135	0	0	0.03,0.018,0.035	0.153,0.151,0.181	-0.134	17,8,23	200184259	101,95,121	251248240	7.63515e-20	1.80469e-17	0.085,0.0434782608696,0.0888030888031	0.402390438247,0.383064516129,0.504166666667	-0.357447	0.067012
Chr5_24059742_24059857	AT5G59710	+	Chr5	24059742	24059857	FALSE	U	0,0,0	85,83,82	49,52,29	102,97,109	270	135	0	0	0.0,0.0,0.0	0.194,0.211,0.117	-0.174	0,0,0	43,38,42	49,52,29	57,56,58	4.34197e-17	7.81325e-15	0.0,0.0,0.0	0.859649122807,0.928571428571,0.5	-0.76274	0.0766525
Chr5_24080754_24080836	AT5G59770	-	Chr5	24080754	24080836	FALSE	U	9,8,4	85,80,91	85,89,116	61,79,91	270	135	0	0	0.05,0.048,0.022	0.411,0.36,0.389	-0.347	9,8,4	71,49,76	85,89,116	68,75,79	1.5386e-29	8.98184e-27	0.12676056338,0.163265306122,0.0526315789474	1,1,1	-0.885781	0.0430182
Chr5_24359157_24359233	AT5G60600	+	Chr5	24359157	24359233	TRUE	I	3,4,5	7,7,9	89,121,83	5,4,4	270	135	0	0	0.176,0.222,0.217	0.899,0.938,0.912	-0.711	3,4,5	359339413	89,121,83	289321291	6.23477e-49	1.24036e-45	0.008356545961,0.0117994100295,0.0121065375303	0.307958477509,0.376947040498,0.285223367698	-0.312622	0.0289815
Chr5_24359157_24359424	AT5G60600	+	Chr5	24359157	24359424	FALSE	EI	2,3,5	461452533	90,109,90	292326327	270	135	0	0	0.002,0.003,0.005	0.134,0.143,0.121	-0.129	5,3,7	125011821440	130169152	100811181013	4.18606e-85	7.49504e-81	0.004,0.00253807106599,0.00486111111111	0.128968253968,0.151162790698,0.150049358342	-0.139594	0.0120833
Chr5_24359325_24359424	AT5G60600	+	Chr5	24359325	24359424	TRUE	I	4,1,4	0,1,1	105127138	9,9,8	270	135	0.0396774	0.300886	1.0,0.333,0.667	0.854,0.876,0.896	-0.209	4,1,4	466441537	105127138	376417378	1.07077e-62	5.89903e-59	0.00858369098712,0.00226757369615,0.00744878957169	0.279255319149,0.304556354916,0.365079365079	-0.310197	0.071762
Chr5_24360332_24360405	AT5G60600	+	Chr5	24360332	24360405	FALSE	U	2,2,0	614603790	75,94,54	449537437	270	135	0	0	0.002,0.002,0.0	0.077,0.08,0.058	-0.07	2,2,0	345326397	75,94,54	278308279	4.37167e-33	3.2614e-30	0.00579710144928,0.00613496932515,0.0	0.269784172662,0.305194805195,0.193548387097	-0.252198	0.039607
Chr5_24740429_24740503	AT5G61520	-	Chr5	24740429	24740503	FALSE	U	8,0,5	73,58,71	73,57,65	56,59,52	270	135	0	0	0.052,0.0,0.034	0.395,0.326,0.385	-0.34	8,0,5	26,14,28	73,57,65	22,22,26	8.09264e-26	3.35021e-23	0.307692307692,0.0,0.178571428571	1,1,1	-0.837912	0.0512112
Chr5_24911013_24911102	AT5G62000	+	Chr5	24911013	24911102	FALSE	U	0,0,0	170170214	26,23,19	177160199	270	135	4.44089e-16	7.68001e-14	0.0,0.0,0.0	0.068,0.067,0.046	-0.06	0,0,0	198206250	26,23,19	220205222	1.36683e-18	2.84567e-16	0.0,0.0,0.0	0.118181818182,0.112195121951,0.0855855855856	-0.105321	0.0768153
Chr5_25105260_25105342	AT5G62540	+	Chr5	25105260	25105342	FALSE	U	3,6,13	109114138	43,48,46	113,107,96	270	135	0	0	0.014,0.026,0.045	0.16,0.183,0.193	-0.15	3,6,13	60,54,81	43,48,46	62,55,57	2.82468e-16	4.58731e-14	0.05,0.111111111111,0.16049382716	0.693548387097,0.872727272727,0.80701754386	-0.683896	0.0800595
Chr5_25133550_25133630	AT5G62610	-	Chr5	25133550	25133630	FALSE	U	7,4,4	135133147	49,69,74	147145188	270	135	0	0	0.025,0.015,0.013	0.143,0.192,0.164	-0.149	7,4,4	50,50,62	49,69,74	67,65,68	2.91566e-17	5.35427e-15	0.14,0.08,0.0645161290323	0.731343283582,1,1	-0.815609	0.0766596
Chr5_25215170_25215255	AT5G62790	-	Chr5	25215170	25215255	FALSE	U	7,2,6	372345393	69,82,96	331366339	270	135	0	0	0.009,0.003,0.008	0.094,0.101,0.124	-0.1	7,2,6	243222259	69,82,96	224255223	9.70267e-31	6.09557e-28	0.0288065843621,0.00900900900901,0.023166023166	0.308035714286,0.321568627451,0.430493273543	-0.333039	0.0433852
Chr5_25238143_25238250	AT5G62880	+	Chr5	25238143	25238250	FALSE	U	12,7,5	84112144	44,46,47	92,89,93	270	135	0	0	0.067,0.03,0.017	0.193,0.205,0.202	-0.162	12,7,5	53,57,90	44,46,47	58,58,64	9.40169e-14	1.07391e-11	0.22641509434,0.122807017544,0.0555555555556	0.758620689655,0.793103448276,0.734375	-0.627107	0.0976522
Chr5_25881636_25882029	AT5G64740	+	Chr5	25881636	25882029	FALSE	U	0,0,0	97125132	42,11,30	123101105	270	135	0	0	0.0,0.0,0.0	0.146,0.052,0.125	-0.108	0,2,3	489652702	80,30,47	762550600	7.12633e-17	1.24483e-14	0.0,0.00306748466258,0.0042735042735	0.10498687664,0.0545454545455,0.0783333333333	-0.0768416	0.077459
Chr5_25956088_25956185	AT5G64960	+	Chr5	25956088	25956185	TRUE	U	22,22,21	184147167	113102104	116140106	270	135	0	0	0.056,0.07,0.059	0.328,0.267,0.329	-0.246	22,22,21	90,70,93	113102104	97105100	2.17552e-21	6.20752e-19	0.244444444444,0.314285714286,0.225806451613	1,0.971428571429,1	-0.728964	0.0616062
Chr5_25970818_25970900	AT5G65010	+	Chr5	25970818	25970900	FALSE	U	23,12,31	429276348	187231223	304417338	270	135	0	0	0.026,0.021,0.043	0.235,0.217,0.248	-0.203	23,12,31	250167213	187231223	233303253	6.47824e-50	1.3646e-46	0.092,0.0718562874251,0.145539906103	0.802575107296,0.762376237624,0.881422924901	-0.712326	0.0294175
Chr5_25970982_25971075	AT5G65010	+	Chr5	25970982	25971075	FALSE	U	2,0,3	414261344	126170157	325393350	270	135	0	0	0.002,0.0,0.004	0.162,0.178,0.183	-0.172	2,0,3	283189241	126170157	264343287	9.65102e-76	9.87424e-72	0.00706713780919,0.0,0.0124481327801	0.477272727273,0.495626822157,0.547038327526	-0.500141	0.0144118
Chr5_26059853_26059934	AT5G65210	+	Chr5	26059853	26059934	FALSE	U	4,0,1	58,41,60	27,25,25	26,50,34	270	135	0	0	0.033,0.0,0.008	0.342,0.2,0.269	-0.257	4,0,1	27,20,28	27,25,25	23,27,25	4.28166e-14	5.08538e-12	0.148148148148,0.0,0.0357142857143	1,0.925925925926,1.0	-0.914021	0.0957821
Chr5_26124011_26124771	AT5G65380	-	Chr5	26124011	26124771	FALSE	U	7,8,6	102138198	62,55,50	133155151	270	135	0	0	0.033,0.028,0.015	0.189,0.151,0.142	-0.135	47,71,62	5558071083	241194192	801721737	5.2799e-20	1.2732e-17	0.0846846846847,0.087980173482,0.0572483841182	0.300873907615,0.26907073509,0.260515603799	-0.200182	0.0678365
Chr5_26309381_26309463	AT5G65760	+	Chr5	26309381	26309463	FALSE	U	1,1,0	65,55,67	22,37,25	32,50,46	270	135	0	0	0.008,0.009,0.0	0.256,0.27,0.214	-0.241	1,1,0	42,38,54	22,37,25	36,44,37	3.70703e-20	9.06122e-18	0.0238095238095,0.0263157894737,0.0	0.611111111111,0.840909090909,0.675675675676	-0.692524	0.0671739
Chr5_26555403_26555507	AT5G66530	-	Chr5	26555403	26555507	FALSE	E	7,5,13	374438461	84,73,68	278283283	270	135	0	0	0.009,0.006,0.014	0.131,0.114,0.107	-0.108	7,5,13	139124168	84,73,68	108109119	2.45996e-32	1.7796e-29	0.0503597122302,0.0403225806452,0.077380952381	0.777777777778,0.669724770642,0.571428571429	-0.616956	0.0404132
Chr5_2835149_2835233	AT5G08710	-	Chr5	2835149	2835233	FALSE	U	2,0,0	58,51,68	45,47,63	65,78,67	270	135	0	0	0.017,0.0,0.0	0.257,0.232,0.32	-0.264	2,0,0	18,13,20	45,47,63	21,22,21	4.12704e-21	1.1196e-18	0.111111111111,0.0,0.0	1,1,1	-0.962963	0.0568466
Chr5_2867009_2867114	AT5G09220	+	Chr5	2867009	2867114	FALSE	U	2,1,1	219208268	19,20,24	170154176	270	135	1.11022e-15	1.85361e-13	0.005,0.002,0.002	0.053,0.061,0.064	-0.056	2,1,1	203153217	19,20,24	144160168	3.34968e-15	4.62236e-13	0.00985221674877,0.00653594771242,0.00460829493088	0.131944444444,0.125,0.142857142857	-0.126268	0.0959507
Chr5_2993905_2993977	AT5G09660	-	Chr5	2993905	2993977	TRUE	U	107,51,111	341131964049	663808769	321137543381	270	135	0	0	0.015,0.008,0.014	0.094,0.097,0.102	-0.085	107,51,111	146313961755	663808769	154218311611	4.04394e-24	1.47017e-21	0.0731373889269,0.0365329512894,0.0632478632479	0.429961089494,0.441288913162,0.477343265053	-0.391892	0.0497712
Chr5_3295109_3295216	AT5G10470	-	Chr5	3295109	3295216	FALSE	U	7,5,18	89,60,110	70,78,76	90,89,99	270	135	0	0	0.038,0.04,0.076	0.28,0.305,0.277	-0.236	7,5,18	99,81,109	70,78,76	147160137	1.21503e-15	1.81289e-13	0.0707070707071,0.0617283950617,0.165137614679	0.47619047619,0.4875,0.554744525547	-0.406954	0.0763519
Chr5_3329138_3329249	AT5G10540	+	Chr5	3329138	3329249	FALSE	U	1,0,0	114114161	27,16,26	118114116	270	135	0	0	0.004,0.0,0.0	0.103,0.066,0.101	-0.089	1,0,0	49,37,52	27,16,26	44,49,47	1.7063e-16	2.82879e-14	0.0204081632653,0.0,0.0	0.613636363636,0.326530612245,0.553191489362	-0.490983	0.0725727
Chr5_3375717_3375818	AT5G10690	-	Chr5	3375717	3375818	FALSE	U	1,1,0	115107129	30,20,30	97,99,99	270	135	0	0	0.004,0.005,0.0	0.134,0.092,0.132	-0.116	1,1,0	73,58,76	30,20,30	62,74,70	1.7984e-14	2.2918e-12	0.013698630137,0.0172413793103,0.0	0.483870967742,0.27027027027,0.428571428571	-0.383924	0.0805447
Chr5_359958_360041	AT5G01920	+	Chr5	359958	360041	FALSE	U	12,9,20	338349367	213190230	295308285	270	135	0	0	0.017,0.013,0.027	0.265,0.236,0.288	-0.244	12,9,20	164161185	213190230	181195180	6.84412e-52	1.69024e-48	0.0731707317073,0.055900621118,0.108108108108	1,0.974358974359,1	-0.912393	0.0236364
Chr5_373864_373941	AT5G01970	-	Chr5	373864	373941	FALSE	U	5,6,7	29,42,28	38,63,64	16,32,28	270	135	0	0	0.079,0.067,0.111	0.543,0.496,0.533	-0.438	5,6,7	11,13,12	38,63,64	12,16,16	3.11644e-15	4.3339e-13	0.454545454545,0.461538461538,0.583333333333	1,1,1	-0.500194	0.0766597
Chr5_3775181_3775375	AT5G11710	+	Chr5	3775181	3775375	FALSE	U	5,6,10	68104136	77,46,65	106,88,71	270	135	0	0	0.035,0.028,0.035	0.266,0.207,0.314	-0.23	9,6,14	125121171	95,55,78	142129130	3.02766e-18	6.09096e-16	0.072,0.0495867768595,0.0818713450292	0.669014084507,0.426356589147,0.6	-0.497304	0.0664216
Chr5_4439181_4439266	AT5G13750	+	Chr5	4439181	4439266	FALSE	U	2,0,11	114,47,163	25,30,36	47,64,74	270	135	0	0	0.009,0.0,0.033	0.21,0.19,0.196	-0.185	2,0,11	39,18,60	25,30,36	28,30,33	2.55772e-14	3.1583e-12	0.0512820512821,0.0,0.183333333333	0.892857142857,1.0,1	-0.886081	0.0828846
Chr5_4584469_4584669	AT5G14220	-	Chr5	4584469	4584669	FALSE	U	0,1,0	66,64,79	31,37,32	74,74,66	270	135	0	0	0.0,0.008,0.0	0.173,0.2,0.195	-0.187	0,1,0	82,83,109	36,39,41	103107110	3.34435e-25	1.32331e-22	0.0,0.0120481927711,0.0	0.349514563107,0.364485981308,0.372727272727	-0.358227	0.048255
Chr5_4661164_4661241	AT5G14460	-	Chr5	4661164	4661241	FALSE	U	7,4,3	109,88,108	69,54,43	100,83,84	270	135	0	0	0.031,0.022,0.014	0.257,0.245,0.204	-0.213	7,4,3	52,42,60	69,54,43	50,55,49	6.46974e-18	1.24224e-15	0.134615384615,0.0952380952381,0.05	1,0.981818181818,0.877551020408	-0.859839	0.0686635
Chr5_4749437_4749515	AT5G14720	-	Chr5	4749437	4749515	FALSE	U	1,3,0	110,98,141	30,32,48	60,95,83	270	135	0	0	0.005,0.015,0.0	0.2,0.144,0.224	-0.183	1,3,0	62,54,74	30,32,48	48,52,50	4.68041e-20	1.13629e-17	0.0161290322581,0.0555555555556,0.0	0.625,0.615384615385,0.96	-0.709567	0.0612434
Chr5_4824397_4824659	AT5G14910	+	Chr5	4824397	4824659	FALSE	U	15,12,25	9067821063	122113108	796857798	270	135	0	0	0.008,0.008,0.012	0.071,0.062,0.063	-0.056	25,17,37	132111281505	175171167	120913011215	4.18341e-54	1.19845e-50	0.0189250567752,0.0150709219858,0.024584717608	0.144747725393,0.13143735588,0.137448559671	-0.118351	0.0228169
Chr5_4975230_4975311	AT5G15310	+	Chr5	4975230	4975311	TRUE	U	24,21,32	110108114	133141155	91,65,72	270	135	0	0	0.098,0.089,0.123	0.422,0.52,0.518	-0.383	24,21,32	42,38,50	133141155	59,55,64	9.21646e-26	3.79353e-23	0.571428571429,0.552631578947,0.64	1,1,1	-0.41198	0.0479592
Chr5_5081588_5081674	AT5G15610	+	Chr5	5081588	5081674	TRUE	U	27,21,16	96,78,116	137123144	77,56,79	270	135	0	0	0.123,0.119,0.065	0.471,0.523,0.477	-0.388	27,21,16	57,47,67	137123144	76,68,80	3.6242e-28	1.88088e-25	0.473684210526,0.446808510638,0.238805970149	1,1,1	-0.613567	0.043668
Chr5_5224705_5224793	AT5G16000	+	Chr5	5224705	5224793	FALSE	U	1,2,0	30,19,23	31,26,21	24,13,19	270	135	0	0	0.016,0.05,0.0	0.392,0.5,0.356	-0.394	1,2,0	24,22,31	31,26,21	24,21,25	1.61035e-16	2.68213e-14	0.0416666666667,0.0909090909091,0.0	1,1,0.84	-0.902475	0.0734141
Chr5_5273986_5274085	AT5G16150	+	Chr5	5273986	5274085	FALSE	U	1,2,2	314297366	26,19,32	201235202	270	135	0	0	0.002,0.003,0.003	0.061,0.039,0.073	-0.055	1,2,2	235223277	26,19,32	168189175	7.68631e-16	1.17877e-13	0.00425531914894,0.00896860986547,0.0072202166065	0.154761904762,0.100529100529,0.182857142857	-0.139235	0.0763291
Chr5_5697617_5697701	AT5G17310	-	Chr5	5697617	5697701	FALSE	U	5,0,0	108,73,149	71,93,93	185230196	270	135	0	0	0.023,0.0,0.0	0.161,0.168,0.192	-0.166	5,0,0	54,39,56	71,93,93	104116120	3.94863e-26	1.68332e-23	0.0925925925926,0.0,0.0	0.682692307692,0.801724137931,0.775	-0.722275	0.0474483
Chr5_5780325_5780395	AT5G17530	+	Chr5	5780325	5780395	FALSE	U	3,2,2	52,51,62	100,75,81	45,50,44	270	135	0	0	0.028,0.019,0.016	0.526,0.429,0.479	-0.457	3,2,2	34,28,38	100,75,81	43,45,42	5.86771e-32	4.08e-29	0.0882352941176,0.0714285714286,0.0526315789474	1,1,1	-0.929235	0.0382407
Chr5_5840826_5841387	AT5G17710	-	Chr5	5840826	5841387	FALSE	I	6,10,8	359301423	54,79,66	371412387	270	135	0	0	0.008,0.016,0.009	0.068,0.087,0.079	-0.067	21,18,29	11599321215	98151119	125813601241	5.90406e-18	1.13667e-15	0.0181190681622,0.019313304721,0.0238683127572	0.0779014308426,0.111029411765,0.0958904109589	-0.0745069	0.0689858
Chr5_6204096_6204177	AT5G18630	+	Chr5	6204096	6204177	FALSE	U	0,3,2	65,103,51	32,32,39	90,61,80	270	135	0	0	0.0,0.014,0.019	0.151,0.208,0.196	-0.174	0,3,2	29,51,32	32,32,39	52,36,39	1.2704e-13	1.42607e-11	0.0,0.0588235294118,0.0625	0.615384615385,0.888888888889,1.0	-0.794317	0.089295
Chr5_6346120_6346202	AT5G19010	-	Chr5	6346120	6346202	FALSE	U	0,0,3	73,61,85	21,26,26	83,74,102	270	135	8.88178e-16	1.49739e-13	0.0,0.0,0.017	0.112,0.149,0.113	-0.119	0,0,3	59,61,68	21,26,26	65,65,66	2.51688e-15	3.57889e-13	0.0,0.0,0.0441176470588	0.323076923077,0.4,0.393939393939	-0.357633	0.0945961
Chr5_6512014_6512205	AT5G19330	-	Chr5	6512014	6512205	FALSE	U	5,1,0	133106151	28,25,26	119123119	270	135	0	0	0.018,0.005,0.0	0.105,0.092,0.098	-0.091	5,1,0	161170202	32,29,26	175195173	2.71732e-15	3.83849e-13	0.0310559006211,0.00588235294118,0.0	0.182857142857,0.148717948718,0.150289017341	-0.148309	0.078755
Chr5_6740133_6740205	AT5G19940	+	Chr5	6740133	6740205	FALSE	U	59,70,85	119713361633	139207192	8001052873	270	135	0	0	0.024,0.026,0.025	0.08,0.09,0.099	-0.065	59,70,85	526641741	139207192	411508432	4.22714e-28	2.16246e-25	0.11216730038,0.109204368175,0.114709851552	0.338199513382,0.407480314961,0.444444444444	-0.284681	0.0431136
Chr5_6824520_6824597	AT5G20220	+	Chr5	6824520	6824597	FALSE	E	2,2,2	26,23,42	143156158	38,39,41	270	135	0	0	0.037,0.042,0.023	0.653,0.667,0.658	-0.625	2,2,2	21,15,23	143156158	61,59,54	3.1365e-31	2.04212e-28	0.0952380952381,0.133333333333,0.0869565217391	1,1,1	-0.894824	0.0393363
Chr5_7128968_7129047	AT5G20990	-	Chr5	7128968	7129047	FALSE	U	6,1,2	126,86,132	43,41,56	122,99,84	270	135	0	0	0.023,0.006,0.008	0.15,0.172,0.25	-0.178	6,1,2	53,40,58	43,41,56	52,54,45	9.89265e-17	1.69094e-14	0.11320754717,0.025,0.0344827586207	0.826923076923,0.759259259259,1	-0.804497	0.0733333
Chr5_7580402_7580487	AT5G22770	-	Chr5	7580402	7580487	FALSE	U	3,2,4	55,25,47	52,41,50	41,27,40	270	135	0	0	0.027,0.038,0.041	0.388,0.432,0.385	-0.366	3,2,4	29,25,35	52,41,50	41,41,43	5.09619e-19	1.11276e-16	0.103448275862,0.08,0.114285714286	1,1.0,1	-0.900755	0.0654839
Chr5_7590610_7590695	AT5G22780	-	Chr5	7590610	7590695	FALSE	U	0,0,0	51,52,71	24,32,20	65,53,56	270	135	0	0	0.0,0.0,0.0	0.156,0.232,0.152	-0.18	0,0,0	31,28,37	24,32,20	41,41,41	3.89207e-16	6.26397e-14	0.0,0.0,0.0	0.585365853659,0.780487804878,0.487804878049	-0.617886	0.0762851
Chr5_7729616_7729707	AT5G23040	-	Chr5	7729616	7729707	FALSE	U	13,6,10	411495565	71,81,82	409418421	270	135	0	0	0.016,0.006,0.009	0.08,0.088,0.089	-0.075	13,6,10	312309379	71,81,82	309306298	1.10946e-31	7.49606e-29	0.0416666666667,0.0194174757282,0.0263852242744	0.229773462783,0.264705882353,0.275167785235	-0.227393	0.0391892
Chr5_8140_8215	AT5G01020	-	Chr5	8140	8215	FALSE	U	15,11,30	142233259	69,76,79	143137141	270	135	0	0	0.05,0.023,0.055	0.194,0.217,0.219	-0.167	15,11,30	88,90,105	69,76,79	74,73,76	4.28181e-18	8.44791e-16	0.170454545455,0.122222222222,0.285714285714	0.932432432432,1,1	-0.78468	0.064975
Chr5_8467408_8467497	AT5G24710	-	Chr5	8467408	8467497	FALSE	U	0,2,0	72,52,78	77,57,66	58,46,41	270	135	0	0	0.0,0.019,0.0	0.399,0.383,0.446	-0.403	0,2,0	47,37,53	77,57,66	49,48,48	2.14875e-39	2.52281e-36	0.0,0.0540540540541,0.0	1,1,1	-0.981982	0.0332414
Chr5_850283_850421	AT5G03430	-	Chr5	850283	850421	FALSE	U	9,9,11	208143209	119165148	226269253	270	135	0	0	0.021,0.031,0.026	0.208,0.235,0.226	-0.197	9,9,11	903110170	119165148	830221208	5.43301e-39	6.0798e-36	0.00996677740864,0.0818181818182,0.0647058823529	0.143373493976,0.746606334842,0.711538461538	-0.481676	0.031875
Chr5_8623297_8623371	AT5G25040	+	Chr5	8623297	8623371	TRUE	U	0,0,0	110,60,101	46,44,49	55,70,73	270	135	0	0	0.0,0.0,0.0	0.295,0.239,0.251	-0.262	0,0,0	47,24,45	46,44,49	33,41,37	9.91454e-35	7.71815e-32	0.0,0.0,0.0	1,1,1	-1	0.0379899
Chr5_8756209_8756298	AT5G25265	-	Chr5	8756209	8756298	FALSE	U	15,30,16	147159212	111,82,76	101,87,91	270	135	0	0	0.049,0.086,0.036	0.355,0.32,0.295	-0.266	15,30,16	74,82,100	111,82,76	67,56,60	5.95486e-17	1.04274e-14	0.202702702703,0.365853658537,0.16	1,1,1	-0.757148	0.0733408
Chr5_88819_88891	AT5G01220	-	Chr5	88819	88891	FALSE	U	6,0,10	113103111	151102105	149,145,98	270	135	0	0	0.026,0.0,0.043	0.336,0.26,0.349	-0.292	6,0,10	56,66,71	151102105	107,94,81	1.23846e-13	1.3968e-11	0.107142857143,0.0,0.140845070423	1,1,1	-0.917337	0.0845977
Chr5_9255915_9256015	AT5G26360	-	Chr5	9255915	9256015	FALSE	U	1,1,0	244146248	34,35,47	219202234	270	135	0	0	0.002,0.003,0.0	0.072,0.08,0.091	-0.079	1,1,0	146102156	34,35,47	148140157	2.25583e-24	8.32785e-22	0.00684931506849,0.00980392156863,0.0	0.22972972973,0.25,0.299363057325	-0.254147	0.0507862
Chr5_9265745_9265818	AT5G26570	+	Chr5	9265745	9265818	FALSE	U	15,5,9	479344535	65,80,66	293341301	270	135	0	0	0.015,0.007,0.008	0.1,0.105,0.099	-0.091	15,5,9	219161245	65,80,66	145163149	5.4614e-36	4.77e-33	0.0684931506849,0.0310559006211,0.0367346938776	0.448275862069,0.490797546012,0.442953020134	-0.415248	0.0373077
Chr5_9319154_9319233	AT5G26670	+	Chr5	9319154	9319233	FALSE	U	0,0,0	33,25,37	30,29,41	19,41,32	270	135	0	0	0.0,0.0,0.0	0.441,0.261,0.39	-0.364	0,0,0	10,7,14	30,29,41	13,16,14	3.75943e-20	9.15804e-18	0.0,0.0,0.0	1,1,1	-1	0.0620103
Chr5_9419279_9419394	AT5G26780	+	Chr5	9419279	9419394	FALSE	U	0,0,1	97,60,100	26,22,29	90,89,98	270	135	0	0	0.0,0.0,0.005	0.126,0.11,0.129	-0.12	0,0,1	73,48,82	26,22,29	81,82,90	1.74142e-16	2.87371e-14	0.0,0.0,0.0121951219512	0.320987654321,0.268292682927,0.322222222222	-0.299769	0.0760521
Chr5_9440720_9440819	AT5G26830	+	Chr5	9440720	9440819	FALSE	U	0,0,2	172131146	44,34,39	205161219	270	135	0	0	0.0,0.0,0.007	0.097,0.096,0.082	-0.089	0,0,2	82,68,92	44,34,39	110105119	4.71906e-21	1.2611e-18	0.0,0.0,0.0217391304348	0.4,0.32380952381,0.327731092437	-0.343267	0.0601351
Chr5_9651090_9651257	AT5G27350	+	Chr5	9651090	9651257	FALSE	U	4,1,2	123136163	61,36,52	322194271	270	135	0	0	0.016,0.004,0.006	0.087,0.085,0.088	-0.078	4,1,2	127139190	61,36,53	321236279	3.94315e-16	6.31777e-14	0.0314960629921,0.00719424460432,0.0105263157895	0.190031152648,0.152542372881,0.189964157706	-0.161107	0.0764905
Chr5_9669753_9669834	AT5G27380	-	Chr5	9669753	9669834	FALSE	U	18,24,41	104115175	132,96,95	117,102,96	270	135	0	0	0.08,0.094,0.105	0.361,0.32,0.331	-0.244	18,24,41	103115158	132,96,95	141117121	3.52931e-21	9.68452e-19	0.174757281553,0.208695652174,0.259493670886	0.936170212766,0.820512820513,0.785123966942	-0.632953	0.0594005
Chr5_9674727_9674819	AT5G27390	-	Chr5	9674727	9674819	TRUE	U	18,28,19	159125178	182159168	124159150	270	135	0	0	0.054,0.101,0.051	0.423,0.333,0.359	-0.303	18,28,19	115,79,113	182159168	124140135	2.56097e-16	4.178e-14	0.15652173913,0.354430379747,0.16814159292	1,1,1	-0.773635	0.0765161
Chr5_9695925_9696017	AT5G27470	+	Chr5	9695925	9696017	FALSE	U	6,4,11	109,87,156	99,93,75	89121129	270	135	0	0	0.027,0.022,0.034	0.357,0.278,0.225	-0.259	6,4,11	94,78,114	99,93,75	108102120	9.32133e-22	2.71376e-19	0.063829787234,0.0512820512821,0.0964912280702	0.916666666667,0.911764705882,0.625	-0.747276	0.0571788
Chr5_9732027_9732222	AT5G27560	+	Chr5	9732027	9732222	FALSE	U	3,4,6	162127196	31,36,41	140166153	270	135	0	0	0.009,0.016,0.015	0.1,0.098,0.118	-0.092	5,4,8	182158222	39,43,52	177203171	1.26522e-15	1.88387e-13	0.0274725274725,0.0253164556962,0.036036036036	0.220338983051,0.211822660099,0.304093567251	-0.21581	0.0782828
Chr5_9745890_9745976	AT5G27600	+	Chr5	9745890	9745976	FALSE	U	6,3,12	47,40,71	72,50,48	44,40,54	270	135	0	0	0.06,0.036,0.078	0.45,0.385,0.308	-0.323	6,3,12	30,22,39	72,50,48	37,34,33	1.95918e-16	3.21086e-14	0.2,0.136363636364,0.307692307692	1,1,1	-0.785315	0.0763462
Chr5_986842_986929	AT5G03760	-	Chr5	986842	986929	FALSE	U	2,0,2	70,48,77	47,34,48	85,121,97	270	135	0	0	0.014,0.0,0.013	0.217,0.123,0.198	-0.17	2,0,2	34,21,39	47,34,48	47,54,53	2.90381e-15	4.06982e-13	0.0588235294118,0.0,0.0512820512821	1.0,0.62962962963,0.905660377358	-0.808395	0.0768201
