# Supplementary material for: RBV, an evolutionarily conserved WD40 repeat protein, promotes microRNA biogenesis and loading into ARGONAUTE1 in Arabidopsis
Source: Research Square preprint supplement (doi:10.21203/rs.3.rs-536724/v1), 2021-06-02
Supplement: Supplementary file 10 [file 02522ed23485e5b17e1a8fcf.xlsx]

## Sheet: Supplementary Data 2
Supplementary Data 2. IDs of genes used in the phylogenetic analysis.
Phytozome accession	Species	Gene name	Annotation version
AT5G64730.1	A thaliana	AthSBV	Araport11
mrna18291.1-v1.0-hybrid	F vesca	FveSBV1	v1.1
mrna17850.1-v1.0-hybrid	F vesca	FveSBV2	v1.1
Glyma.08G145700.1	G max	GmaSBV1	Wm82.a2.v1
Glyma.05G187400.1	G max	GmaSBV2	Wm82.a2.v1
Manes.12G148300.1	M esculenta	MesSBV1	v6.1
Manes.12G148000.1	M esculenta	MesSBV2	v6.1
MDP0000143524	M domestica	MdoSBV1	v1.0
MDP0000196826	M domestica	MdoSBV2	v1.0
Migut.L00052.1	M guttatus	MguSBV	v2.0
Solyc11g005550.1.1	S lycopersicum	SlySBV	ITAG2.4
PGSC0003DMT400010145	S tuberosum	StuSBV	v4.03
Aqcoe6G041900.1	A coerulea	AcoSBV	v3.1
GSVIVT01016788001	V carteri	VcaSBV	v2.1
Potri.001G306500.1	P trichocarpa	PtrSBV	v3.0
Spipo9G0040000	S polyrhiza	SpoSBV	v2
evm_27.model.AmTr_v1.0_scaffold00340.2	A trichopoda	AtrSBV	v1.0
Phvul.002G268300.2	P vulgaris	PvuSBV	v2.1
Medtr8g092620.1	M truncatula	MtrSBV	Mt4.0v1
Prupe.6G161500.1	P persica	PpeSBV	v2.1
27436.m000276	R communis	RcoSBV	v0.1
evm.model.supercontig_72.36	C papaya	CpaSBV	ASGPBv0.4
Carubv10026838m	C rubella	CruSBV	v1.0
Cagra.2438s0030.1	C grandiflora	CgrSBV	v1.1
Araha.30213s0006.1	A halleri	AhaSBV	v1.1
AL8G42180.t1	A lyrata	AlySBV	v2.1
Brara.F02345.1	B rapaFPsc	BraSBV	v1.3
Thhalv10004678m	E salsugineum	EsaSBV	v1.0
Bradi3g45337.1	B distachyon	BdiSBV	v3.1
Zm00008a016456_T01	Z mays	ZmaSBV1	v1.1
Zm00008a016527_T01	Z mays	ZmaSBV2	v1.1
LOC_Os02g33860.1	O sativa	OsaSBV	v7.0
Sobic.004G171200.1	S bicolor	SbiSBV	v3.1
Seita.1G187700.1	S italica	SitSBV	v2.2
Pavir.Aa01730.1	P virgatum	PviSBV1	v1.1
Pavir.Ab01890.1	P virgatum	PviSBV2	v1.1
Pahal.A02065.1	P hallii	PhaSBV	v2.0
Mapoly0011s0172.1	M polymorpha	MpoSBV	v3.1
MA_10426368g0010	P abies	PabSBV	v1.0
Pp3c23_12950V3.1	P patens	PpaSBV	v3.3
79311	S moellendorffii	SmoSBV	v1.0
Vocar.0018s0268.1	V carteri	VcaSBV	v2.1
Cre16.g675301.t1.1	C reinhardtii	CreSBV	v5.5
kfl00368_0080_v1.1	K nitens	KniSBV	v1.1
Mapoly0102s0055.1	M polymorpha		v3.1
268258	S moellendorffii		v1.0
kfl00375_0040_v1.1	K nitens		v1.1
MA_10433772g0010	P abies		v1.0
evm.model.supercontig_1360.1	C papaya		ASGPBv0.4
mrna10012.1-v1.0-hybrid	F vesca		v1.1
MDP0000263167	M domestica		v1.0
MDP0000643281	M domestica		v1.0
Manes.14G056900.1	M esculenta		v6.1
Manes.06G112800.1	M esculenta		v6.1
Aqcoe5G385300.1	A coerulea		v3.1
Aqcoe3G137100.1	A coerulea		v3.1
PGSC0003DMT400039207	S tuberosum		v4.03
Solyc03g111740.2.1	S lycopersicum		ITAG2.4
Migut.D02035.1	M guttatus		v2.0
Medtr3g075400.1	M truncatula		Mt4.0v1
Medtr4g104380.1	M truncatula		Mt4.0v1
Phvul.003G207100.1	P vulgaris		v2.1
Glyma.17G126200.1	G max		Wm82.a2.v1
Glyma.05G043700.1	G max		Wm82.a2.v1
Potri.015G087200.1	P trichocarpa		v3.0
30147.m013828	R communis		v0.1
Prupe.5G160700.1	P persica		v2.1
Carubv10026249m	C rubella		v1.0
AT5G50230.1	A thaliana		Araport11
Cagra.0888s0031.1	C grandiflora		v1.1
Thhalv10013321m	E salsugineum		v1.0
Brara.J00659.1	B rapaFPsc		v1.3
AL8G24250.t1	A lyrata		v2.1
