# Supplementary material for: RBV, an evolutionarily conserved WD40 repeat protein, promotes microRNA biogenesis and loading into ARGONAUTE1 in Arabidopsis
Source: Research Square preprint supplement (doi:10.21203/rs.3.rs-536724/v1), 2021-06-02
Supplement: Supplementary file 12 [file 81147928c0c8a5ee82d96981.xlsx]

## Sheet: Supplementary Data 4
Supplementary Data 4. Small RNA reads in rbv-1 and Col AGO1 IP samples.
ID		Raw counts												Normailized counts (RPM)
																										IP/input (rbv-1/Col)					input(rbv-1/Col)
Name	Length	Col-1-AGOIP	Col-1-input	Col-2-AGOIP	Col-2-input	Col-3-AGOIP	Col-3-input	rbv-1-1-AGOIP	rbv-1-1-input	rbv-1-2-AGOIP	rbv-1-2-input	rbv-1-3-AGOIP	rbv-1-3-input	Col-1-AGOIP	Col-1-input	Col-2-AGOIP	Col-2-input	Col-3-AGOIP	Col-3-input	rbv-1-1-AGOIP	rbv-1-1-input	rbv-1-2-AGOIP	rbv-1-2-input	rbv-1-3-AGOIP	rbv-1-3-input	ava_ColIP/Colinput	ava_rbv-1IP/rbv-1input	IP/input (rbv-1/Col)	log2 value		ava_Col input	ava_rbv-1_input	input rbv-1/Col	log2value input
ath-miR156a,b,c,d,e,f	20	35783	4726	127403	6774	56531	4396	45887	4116	21466	4751	51615	3695	5239.06	300.73	6616.86	327.97	4896.73	318.13	2857.09	249.9	2032.44	260.02	3308.76	250.19	17.6934	10.7857	0.609586	-0.714097		315.61	253.37	0.802795	-0.316897
ath-miR157a,b,c	21	1738	722	7272	1232	3138	600	3708	1133	1957	1046	4928	766	254.46	45.94	377.68	59.65	271.81	43.42	230.87	68.79	185.29	57.25	315.91	51.87	6.06637	4.11483	0.678302	-0.56		49.67	59.3033	1.19395	0.255738
ath-miR158a	20	254791	46546	806909	65271	403278	40085	565280	56057	296567	46131	678647	50637	37304.5	2961.84	41908	3160.16	34932	2900.89	35196.4	3403.43	28079.5	2524.78	43504.5	3428.7	12.6505	11.4119	0.902089	-0.148658		3007.63	3118.97	1.03702	0.0524426
ath-miR158b	20	1495	331	4756	378	2434	253	4623	475	2238	421	5123	398	218.89	21.06	247.01	18.3	210.83	18.31	287.84	28.84	211.9	23.04	328.41	26.95	11.7345	10.5055	0.895266	-0.159612		19.2233	26.2767	1.36692	0.450924
ath-miR159a	21	97869	25495	338900	33058	143732	21459	170271	23147	110247	24641	244211	19354	14329.2	1622.31	17601.3	1600.54	12450.1	1552.96	10601.7	1405.34	10438.4	1348.62	15655.1	1310.49	9.29278	9.02832	0.971541	-0.0416529		1591.94	1354.82	0.851049	-0.232685
ath-miR159b	21	89372	27328	319018	32297	139327	23430	123937	19317	81571	24530	207433	20627	13085.1	1738.95	16568.7	1563.69	12068.5	1695.59	7716.76	1172.81	7723.28	1342.54	13297.4	1396.68	8.34742	7.34592	0.880023	-0.184386		1666.08	1304.01	0.782683	-0.3535
ath-miR159c	21	255	415	879	594	367	340	305	390	195	328	614	478	37.34	26.41	45.65	28.76	31.79	24.61	18.99	23.68	18.46	17.95	39.36	32.37	1.43871	1.03797	0.721463	-0.471003		26.5933	24.6667	0.927551	-0.108502
ath-miR160a,b,c	21	1072	718	3931	828	1875	424	1951	468	903	457	2475	309	156.95	45.69	204.16	40.09	162.41	30.68	121.48	28.41	85.5	25.01	158.66	20.92	4.49528	4.91848	1.09414	0.129803		38.82	24.78	0.638331	-0.647624
ath-miR161.1	21	54443	15257	232077	20110	93578	12922	166186	18109	90935	19824	193416	16970	7971.11	970.84	12053.3	973.65	8105.75	935.15	10347.3	1099.47	8609.88	1084.98	12398.9	1149.06	9.76862	9.40633	0.962913	-0.0545232		959.88	1111.17	1.15761	0.211154
ath-miR161.2	21	380	180	1415	242	746	127	1152	230	495	208	1192	152	55.64	11.45	73.49	11.72	64.62	9.19	71.73	13.96	46.87	11.38	76.41	10.29	5.98733	5.4732	0.91413	-0.129529		10.7867	11.8767	1.10105	0.138881
ath-miR162a,b	21	159972	7364	529613	9721	377161	6597	448660	6031	121940	6558	315580	4994	23421.8	468.59	27506.2	470.65	32669.8	477.42	27935.2	366.16	11545.5	358.92	20230.2	338.15	59.0105	56.1599	0.951693	-0.0714323		472.22	354.41	0.750519	-0.41404
ath-miR163	24	4073	3278	10036	4804	5932	3363	5495	5588	3499	5369	8789	4921	596.34	208.59	521.23	232.59	513.83	243.38	342.14	339.27	331.29	293.85	563.42	333.21	2.38314	1.27995	0.537085	-0.896779		228.187	322.11	1.41161	0.497339
ath-miR164a,b	21	794	556	3643	835	1560	473	1751	634	887	635	2169	433	116.25	35.38	189.2	40.43	135.13	34.23	109.02	38.49	83.98	34.75	139.04	29.32	4.00382	3.23752	0.808608	-0.306487		36.68	34.1867	0.932025	-0.10156
ath-miR165a,b	21	42071	2881	130059	3872	74925	2354	60706	2217	28388	2354	68670	1503	6159.7	183.33	6754.8	187.47	6490.02	170.36	3779.77	134.6	2687.82	128.84	4402.07	101.77	35.8573	29.7628	0.830034	-0.268757		180.387	121.737	0.674865	-0.567329
ath-miR166a,b,c,d,e,f,g	21	128062	18931	389645	23532	205108	15520	200390	17435	102039	17642	239349	11876	18749.8	1204.63	20236.8	1139.32	17766.5	1123.16	12477	1058.54	9661.23	965.56	15343.4	804.14	16.369	13.2526	0.809618	-0.304686		1155.7	942.747	0.815734	-0.293829
ath-miR167a,b	21	15779	4270	74582	5801	30463	3532	30210	3118	14905	3201	36450	2394	2310.23	271.71	3873.52	280.86	2638.71	255.61	1880.98	189.31	1411.23	175.19	2336.62	162.1	10.9165	10.689	0.979165	-0.0303768		269.393	175.533	0.651588	-0.617969
ath-miR167d	22	328	397	1168	468	709	302	537	163	179	162	448	124	48.02	25.26	60.66	22.66	61.41	21.86	33.44	9.9	16.95	8.87	28.72	8.4	2.43752	2.91167	1.19452	0.256433		23.26	9.05667	0.389367	-1.3608
ath-miR168a,b	21	3713	455	11431	739	5914	463	4630	581	2533	584	5816	441	543.63	28.95	593.69	35.78	512.27	33.51	288.28	35.27	239.83	31.96	372.83	29.86	16.7914	9.27943	0.552629	-0.855617		32.7467	32.3633	0.988294	-0.0169879
ath-miR170	21	523	288	1801	359	789	241	622	193	414	205	792	145	76.57	18.33	93.54	17.38	68.34	17.44	38.73	11.72	39.2	11.22	50.77	9.82	4.48636	3.92857	0.87567	-0.19154		17.7167	10.92	0.616369	-0.698134
ath-miR171a	21	136	344	759	395	225	221	175	159	88	198	346	131	19.91	21.89	39.42	19.12	19.49	15.99	10.9	9.65	8.33	10.84	22.18	8.87	1.38281	1.41042	1.01997	0.0285274		19	9.78667	0.515088	-0.95711
ath-miR171b,c	21	304	182	1043	257	767	123	946	198	275	163	724	126	44.51	11.58	54.17	12.44	66.44	8.9	58.9	12.02	26.04	8.92	46.41	8.53	5.0158	4.45707	0.888608	-0.170381		10.9733	9.82333	0.8952	-0.159717
ath-miR172a,b	21	139	464	615	671	233	431	187	553	93	430	333	240	20.35	29.53	31.94	32.49	20.18	31.19	11.64	33.57	8.81	23.53	21.35	16.25	0.777492	0.56987	0.73296	-0.448193		31.07	24.45	0.786933	-0.345688
ath-miR173	22	1671	857	5477	1126	3114	633	5612	1042	2254	1125	6522	682	244.65	54.53	284.46	54.52	269.74	45.81	349.42	63.26	213.41	61.57	418.09	46.18	5.15853	5.73604	1.11195	0.153095		51.62	57.0033	1.10429	0.143116
ath-miR319a,b	21	4031	2908	10707	3421	6432	2073	6082	2750	3775	3136	10697	3343	590.19	185.04	556.08	165.63	557.14	150.02	378.69	166.96	357.42	171.64	685.73	226.36	3.40213	2.51671	0.739746	-0.434898		166.897	188.32	1.12836	0.174231
ath-miR319c	21	712	515	1406	534	1041	377	575	254	340	332	962	374	104.25	32.77	73.02	25.85	90.17	27.28	35.8	15.42	32.19	18.17	61.67	25.32	3.11339	2.20098	0.706942	-0.500336		28.6333	19.6367	0.685797	-0.544146
ath-miR390a,b	21	73	555	328	752	168	387	183	740	80	832	169	457	10.69	35.32	17.04	36.41	14.55	28.01	11.39	44.93	7.57	45.54	10.83	30.94	0.423902	0.245367	0.578829	-0.78879		33.2467	40.47	1.21726	0.283643
ath-miR394a,b	20	2264	685	10215	992	4380	497	3635	494	1634	569	5020	440	331.48	43.59	530.53	48.03	379.4	35.97	226.33	29.99	154.71	31.14	321.81	29.79	9.72968	7.73042	0.79452	-0.331845		42.53	30.3067	0.712595	-0.488846
ath-miR395b,c,f	21	1536	337	4824	489	2852	294	2593	365	1258	325	2778	296	224.89	21.44	250.54	23.68	247.04	21.28	161.45	22.16	119.11	17.79	178.08	20.04	10.8806	7.64527	0.702654	-0.509114		22.1333	19.9967	0.903464	-0.146461
ath-miR395a,d,e	21	902	249	2562	402	1585	305	1821	412	812	467	1892	339	132.06	15.84	133.06	19.46	137.29	22.07	113.38	25.01	76.88	25.56	121.29	22.95	7.01429	4.23762	0.604141	-0.727043		19.1233	24.5067	1.28151	0.35784
ath-miR396a	21	10026	4092	35095	4986	35720	2525	41772	2663	8219	3284	22423	2089	1467.93	260.38	1822.71	241.4	3094.07	182.73	2600.88	161.68	778.19	179.74	1437.42	141.45	9.32742	9.97471	1.0694	0.0967979		228.17	160.957	0.705424	-0.503437
ath-miR396b	21	231351	7027	779960	9943	409701	6111	410667	7525	224631	7902	534297	7418	33872.6	447.15	40508.3	481.4	35488.4	442.24	25569.6	456.87	21268.5	432.48	34250.9	502.28	80.1504	58.2691	0.726997	-0.459978		456.93	463.877	1.0152	0.0217681
ath-miR397b	21	359	232	1084	255	718	171	1420	354	527	383	1446	220	52.56	14.76	56.3	12.35	62.19	12.38	88.41	21.49	49.9	20.96	92.7	14.9	4.33148	4.02807	0.929954	-0.104769		13.1633	19.1167	1.45227	0.538306
ath-miR398a	21	15337	1610	57581	1611	34518	1018	37319	1625	16944	1756	40823	1943	2245.52	102.45	2990.55	78	2989.96	73.67	2323.62	98.66	1604.29	96.11	2616.95	131.56	32.3707	20.056	0.619572	-0.690656		84.7067	108.777	1.28416	0.360822
ath-miR398b,c	21	736323	89507	1877447	88975	1486262	58945	2074732	62695	690264	84132	1481170	56793	107807	5695.55	97507.9	4307.81	128740	4265.76	129180	3806.45	65355.4	4604.59	94950	3845.53	23.411	23.6188	1.00888	0.0127483		4756.37	4085.52	0.858958	-0.219341
ath-miR399b,c	21	754	2660	1927	3367	1348	2386	2054	2406	896	2859	2152	2091	110.39	169.26	100.08	163.02	116.76	172.67	127.89	146.08	84.83	156.47	137.95	141.58	0.648044	0.789566	1.21838	0.284968		168.317	148.043	0.879552	-0.185159
ath-miR403	21	23589	3563	72261	5081	46323	3031	48856	3764	17256	3808	44490	3022	3453.71	226.72	3752.98	246	4012.51	219.35	3041.95	228.53	1633.83	208.41	2852.02	204.62	16.2111	11.7336	0.723801	-0.466336		230.69	213.853	0.927016	-0.109334
ath-miR408	21	56802	9254	180046	12634	118526	7757	168260	14377	60610	15322	137091	8551	8316.49	588.86	9350.95	611.69	10266.8	561.36	10476.5	872.88	5738.66	838.58	8788.18	579	15.8545	10.9163	0.688529	-0.53841		587.303	763.487	1.29999	0.378497
ath-miR447a.2	21	1145	275	3695	335	1774	296	1132	188	659	175	1681	200	167.64	17.5	191.91	16.22	153.66	21.42	70.48	11.41	62.4	9.58	107.76	13.54	9.3074	6.96901	0.74876	-0.417424		18.38	11.51	0.626224	-0.675249
ath-miR5026	21	4321	2362	12328	3235	8022	2105	4524	2645	1459	3062	4147	3205	632.65	150.3	640.27	156.63	694.87	152.34	281.68	160.59	138.14	167.58	265.84	217.02	4.2846	1.25765	0.293528	-1.76843		153.09	181.73	1.18708	0.247417
ath-miR775	20	405	203	1996	264	699	141	1116	163	504	174	1301	89	59.3	12.92	103.67	12.78	60.55	10.2	69.49	9.9	47.72	9.52	83.4	6.03	6.22618	7.88251	1.26603	0.340308		11.9667	8.48333	0.708914	-0.496318
ath-miR822	21	724	668	2967	888	1558	461	1652	568	634	654	2085	461	106	42.51	154.1	42.99	134.95	33.36	102.86	34.49	60.03	35.79	133.66	31.21	3.32366	2.92196	0.879141	-0.185834		39.62	33.83	0.853862	-0.227926
ath-miR824	21	317	280	1117	389	574	195	452	277	220	293	564	175	46.41	17.82	58.01	18.83	49.72	14.11	28.14	16.82	20.83	16.04	36.16	11.85	3.03664	1.90405	0.627024	-0.673407		16.92	14.9033	0.880812	-0.183095
ath-miR827	21	4374	4859	20880	5872	7606	3329	4696	2770	2688	3084	8415	3359	640.41	309.19	1084.43	284.3	658.83	240.91	292.39	168.18	254.5	168.79	539.44	227.44	2.85675	1.92472	0.673745	-0.569726		278.133	188.137	0.676426	-0.563996
ath-miR843	21	1779	95	5836	102	3043	64	21800	324	8768	324	18433	330	260.47	6.05	303.1	4.94	263.59	4.63	1357.35	19.67	830.17	17.73	1181.64	22.34	52.9552	56.3971	1.065	0.0908478		5.20667	19.9133	3.82458	1.9353
ath-miR845a	21	13048	349	26126	366	23756	319	869574	8954	281177	15543	645750	13203	1910.38	22.21	1356.89	17.72	2057.75	23.09	54142.8	543.63	26622.3	850.68	41395.6	893.99	84.4973	53.3849	0.631795	-0.662472		21.0067	762.767	36.3107	5.18232
ath-miR845b	22	199	9	426	3	384	14	17232	317	5605	512	12079	373	29.14	0.57	22.12	0.15	33.26	1.01	1072.93	19.25	530.69	28.02	774.32	25.26	48.8555	32.7856	0.671073	-0.575458		0.576667	24.1767	41.9249	5.38973
ath-miR846	21	6819	1489	21727	1999	9949	1532	11477	2082	7717	2375	18174	2163	998.38	94.75	1128.42	96.78	861.78	110.87	714.6	126.41	730.66	129.99	1165.04	146.46	9.88287	6.47942	0.655621	-0.609065		100.8	134.287	1.33221	0.41382
ath-miR858a	21	1894	536	5989	657	2713	479	2360	482	1623	654	3720	487	277.3	34.11	311.05	31.81	235	34.66	146.94	29.26	153.67	35.79	238.47	32.98	8.18602	5.49913	0.671771	-0.573958		33.5267	32.6767	0.974647	-0.0370482
ath-miR858b	21	1056	725	3328	1040	1655	630	1780	703	877	768	2205	649	154.61	46.13	172.84	50.35	143.36	45.59	110.83	42.68	83.04	42.03	141.35	43.94	3.31393	2.60567	0.786279	-0.346886		47.3567	42.8833	0.90554	-0.14315
