# Supplementary material for: RBV, an evolutionarily conserved WD40 repeat protein, promotes microRNA biogenesis and loading into ARGONAUTE1 in Arabidopsis
Source: Research Square preprint supplement (doi:10.21203/rs.3.rs-536724/v1), 2021-06-02
Supplement: Supplementary file 13 [file b4f3d4ecafc1692dc1f63240.xlsx]

## Sheet: Supplementary Data 1
Supplementary Data 1. miRNAs from small RNA sequencing of amiR-SUL and amiR-SUL rbv-1.
	baseMean	log2FoldChange	log2 value	lfcSE	stat	pvalue	padj	amiR-SUL_Rep1	amiR-SUL_Rep2	amiR-SUL_Rep3	amiR-SUL rbv-1_Rep1	amiR-SUL rbv-1_Rep2	amiR-SUL rbv-1_Rep3	amiR-SUL rbv-1_Rep1/amiR-SUL_Rep1	amiR-SUL rbv-1_Rep2/amiR-SUL_Rep2	amiR-SUL rbv-1_Rep3/amiR-SUL_Rep3
ath-miR156a	15.5513	-0.589392	-0.430724	0.52009	-1.13325	0.25711	0.437782	511.981	976.026	687.782	524.159	560.549	529.487	0.0339116	-0.800077	-0.377356
ath-miR156b	184.163	0.924474	0.95888	0.327823	2.82004	0.00480175	0.0195168	140.73	141.629	92.9987	206.055	211.147	312.42	0.550098	0.576126	1.7482
ath-miR156c	35.9521	-0.571704	-0.571792	0.409293	-1.39681	0.162471	0.310172	449.818	1142.01	791	497.096	592.241	513.782	0.144182	-0.947315	-0.622522
ath-miR156d	2697.13	-1.48002	-1.51252	0.280613	-5.27424	1.33305e-07	2.23952e-06	3179.81	4751.96	4051.07	1313.25	1539.43	1347.27	-1.2758	-1.62612	-1.58826
ath-miR157a	2716.23	-0.076358	-0.0783712	0.332437	-0.229691	0.818332	0.89874	2934.61	3590.72	1844.65	2120.85	2266.76	3539.82	-0.468529	-0.663643	0.940334
ath-miR157c	1736.18	-0.207919	-0.2127	0.291151	-0.714129	0.475147	0.6204	1569.18	2431.41	1591.2	1505.53	1586.57	1733.17	-0.0597421	-0.615881	0.123302
ath-miR158a	5375.86	-0.342845	-0.352078	0.308008	-1.1131	0.265663	0.440442	3977.14	7699.9	6408.74	4874.1	5029.1	4266.18	0.293407	-0.61454	-0.587094
ath-miR158b	395.337	2.1887	2.24495	0.313858	6.97355	3.09031e-12	1.29793e-10	93.6762	172.391	147.163	610.094	715.443	633.253	2.70328	2.05316	2.10537
ath-miR159a	86302.1	-0.872006	-0.893556	0.297548	-2.93064	0.00338266	0.015222	77147.8	133146	126323	54911.3	64214	62070.6	-0.490521	-1.05205	-1.02514
ath-miR159b	79195	-1.06785	-1.0921	0.285777	-3.73667	0.00018647	0.00138207	78960	118514	125973	49893.3	53108	48720.6	-0.662274	-1.15806	-1.37051
ath-miR159c	363.681	-1.25611	-1.30438	0.361753	-3.47228	0.000516063	0.00333456	295.274	735.704	522.224	266.827	201.639	160.417	-0.146151	-1.86735	-1.70284
ath-miR160a	135.518	-0.302806	-0.310019	0.374534	-0.808487	0.41881	0.566797	138.14	223.018	88.9109	97.8049	112.11	153.125	-0.498152	-0.992249	0.784277
ath-miR160b	76.2484	-1.79841	-1.88997	0.40715	-4.41706	1.00051e-05	0.000114604	69.9334	187.13	103.218	36.0834	36.4456	24.6795	-0.954647	-2.36023	-2.06432
ath-miR160c	347.422	-0.65793	-0.67669	0.313647	-2.09768	0.0359336	0.102901	320.744	508.841	452.73	215.076	257.892	329.247	-0.576576	-0.980445	-0.459482
ath-miR161.1	37578.9	-0.533639	-0.545905	0.287591	-1.85555	0.0635174	0.160107	46525.6	44576.7	42713	22512.2	31624.9	37521.2	-1.04731	-0.495231	-0.186968
ath-miR161.2	149.438	-0.180049	-0.193508	0.420068	-0.428618	0.668201	0.794277	66.0482	246.73	165.558	144.808	175.89	97.5961	1.13255	-0.488262	-0.762443
ath-miR162a	1704.39	-1.29315	-1.33525	0.337457	-3.83206	0.000127076	0.001033	1768.62	2303.24	3251.89	623.388	1121.5	1157.69	-1.50443	-1.03824	-1.49003
ath-miR162b	29243.1	-0.782508	-0.803417	0.308714	-2.53473	0.0112533	0.0399412	28411.5	37949	45184.1	15529.6	22344.7	26039.7	-0.871453	-0.764127	-0.795105
ath-miR164a	232.062	-1.48487	-1.53726	0.350875	-4.23192	2.31709e-05	0.000224579	208.937	498.587	328.05	109.674	112.506	134.615	-0.929839	-2.14784	-1.28508
ath-miR164b	411.721	-0.570623	-0.584698	0.306689	-1.86059	0.0628021	0.160107	428.234	638.935	414.917	297.213	296.715	394.311	-0.526902	-1.10659	-0.0734913
ath-miR164c	441.62	-1.21424	-1.25652	0.355636	-3.41427	0.000639524	0.00393073	713.58	774.156	380.171	167.598	300.676	313.542	-2.09007	-1.36441	-0.277991
ath-miR165a	5061.46	-1.46476	-1.50011	0.29437	-4.97592	6.49398e-07	9.62637e-06	6537.05	7760.78	8138.92	2063.87	2437.1	3431.01	-1.66328	-1.67103	-1.24621
ath-miR165b	2699.46	-2.27213	-2.34588	0.339425	-6.69406	2.17057e-11	6.07761e-10	5584.74	4837.83	3111.88	610.569	813.292	1238.46	-3.19327	-2.57252	-1.32924
ath-miR166a	40051.3	-0.870494	-0.890442	0.287104	-3.03198	0.00242952	0.0113378	45441.2	60057.3	50601.5	22243	27733.9	34231	-1.03065	-1.11469	-0.563878
ath-miR166b	43.4974	-0.434137	-0.452217	0.490718	-0.884698	0.37632	0.528105	72.9552	46.1417	31.6809	12.8191	39.6148	57.7724	-2.50872	-0.220032	0.866768
ath-miR166c	412.262	-0.664817	-0.683024	0.313033	-2.1238	0.0336873	0.0987115	453.704	574.849	495.653	215.551	346.233	387.58	-1.07372	-0.731438	-0.354835
ath-miR166d	19.7688	-1.00254	-1.12384	0.529254	-1.89424	0.0581926	0.152756	16.8358	25.6343	38.8346	9.02084	20.9958	7.29166	-0.900199	-0.287971	-2.41302
ath-miR166e	8249.03	-0.126354	-0.129444	0.293164	-0.431001	0.666468	0.794277	6985.57	8768.85	10102.1	6565.75	7241.59	9830.28	-0.0894177	-0.276082	-0.0393524
ath-miR166f	374.029	1.12892	1.17504	0.357947	3.15387	0.00161123	0.00845893	312.11	227.504	149.207	479.054	358.91	717.387	0.618134	0.657729	2.26544
ath-miR166g	79.5819	0.352749	0.369881	0.388567	0.90782	0.363974	0.521066	82.4523	46.1417	79.7132	100.654	54.6684	113.862	0.287767	0.244636	0.514397
ath-miR167a	3435.2	-0.95623	-0.987996	0.341652	-2.79884	0.00512866	0.0205147	2723.95	6685.42	4293.27	2662.1	2332.12	1914.34	-0.0331355	-1.51937	-1.16523
ath-miR167b	1054.49	-0.962255	-1.00455	0.387267	-2.48474	0.0129647	0.0453765	602.204	2082.15	1538.06	552.645	841.815	710.096	-0.123899	-1.3065	-1.11502
ath-miR167d	109.126	-1.06167	-1.39083	0.368615	-2.88015	0.0039748	0.0172698	200.303	504.995	327.028	141.485	146.179	106.01	-0.501537	-1.78854	-1.62522
ath-miR168a	1890	-0.812811	-0.828111	0.261172	-3.11217	0.00185719	0.00955127	2328.09	2524.34	2401.62	1233.01	1414.25	1438.7	-0.916967	-0.835869	-0.739238
ath-miR168b	740.528	-0.537585	-0.555275	0.328792	-1.63503	0.102043	0.21609	650.122	751.085	1242.71	466.71	627.498	705.048	-0.478183	-0.259364	-0.817695
ath-miR169e	160.535	-2.5176	-2.61602	0.363127	-6.93313	4.11642e-12	1.48191e-10	158.429	324.274	345.424	54.1251	40.0109	40.9455	-1.54947	-3.01875	-3.07659
ath-miR169f	171.405	-2.56476	-2.67499	0.377505	-6.79397	1.09093e-11	3.43642e-10	154.112	394.768	340.314	51.2764	51.4992	36.4583	-1.58762	-2.93838	-3.22255
ath-miR170	261.203	-0.933608	-0.963522	0.329057	-2.83723	0.00455074	0.0191131	221.887	449.241	364.841	193.236	159.648	178.365	-0.199464	-1.4926	-1.03243
ath-miR171a	430.294	-1.3957	-1.43114	0.297268	-4.69508	2.66497e-06	3.35787e-05	536.156	611.378	735.814	182.316	254.723	261.378	-1.55621	-1.26313	-1.4932
ath-miR171b	145.735	-0.989394	-1.02308	0.324254	-3.0513	0.00227855	0.0108339	138.572	223.659	223.81	89.2589	106.564	92.548	-0.634565	-1.06958	-1.274
ath-miR171c	121.365	-1.01541	-1.05617	0.356446	-2.84871	0.00438971	0.0187493	101.878	219.173	170.668	68.8433	91.9063	75.7211	-0.565459	-1.25383	-1.17242
ath-miR172a	30.324	0.41693	0.442732	0.426496	0.97757	0.328287	0.497779	25.0379	27.5569	24.5271	47.0033	24.165	33.6538	0.908651	-0.189491	0.456392
ath-miR172b	100.26	-1.00166	-1.05944	0.431359	-2.32211	0.020227	0.0670686	65.1848	226.863	114.46	85.9354	65.3644	43.75	0.398717	-1.79525	-1.38749
ath-miR173	21.9681	0.0121031	-0.206463	0.461754	0.0262111	0.979089	0.988642	248.652	811.325	472.147	555.494	439.724	332.612	1.15964	-0.883681	-0.505397
ath-miR1886.2	52.2046	-1.34281	-1.41453	0.40777	-3.29306	0.000991044	0.00554985	41.442	102.537	83.8011	30.8608	26.5419	28.0449	-0.425319	-1.9498	-1.57923
ath-miR1888a	67.3265	-1.55152	-1.60906	0.347116	-4.46974	7.83159e-06	9.3979e-05	82.4523	118.559	103.218	34.1843	35.2572	30.2884	-1.27023	-1.74961	-1.76886
ath-miR319a	3775.61	-0.369753	-0.379491	0.304572	-1.21401	0.224744	0.398842	3064.98	4965.36	4777.68	2591.83	3422.32	3831.49	-0.241907	-0.536923	-0.318406
ath-miR319b	294.344	-0.204612	-0.213194	0.344421	-0.594075	0.552462	0.693365	191.669	417.198	339.292	212.702	289.98	315.224	0.150214	-0.524777	-0.106149
ath-miR319c	643.352	-0.739866	-0.444011	0.342635	-2.15934	0.0308235	0.0947259	3826.48	6254.77	6970.82	3718.49	4562.44	4253.84	-0.0413017	-0.455151	-0.712561
ath-miR390a	243.167	-0.344578	-0.353833	0.294239	-1.17108	0.241567	0.416951	253.401	259.547	305.567	183.74	203.224	253.526	-0.463752	-0.352926	-0.269359
ath-miR390b	130.234	-1.48493	-1.54028	0.352989	-4.20674	2.59083e-05	0.000241811	117.419	257.625	206.437	69.7928	63.3837	66.7468	-0.750515	-2.02309	-1.62893
ath-miR391	269.298	0.694887	0.723803	0.380642	1.82556	0.0679161	0.166164	117.851	335.168	156.36	407.362	310.184	288.862	1.78935	-0.111762	0.885505
ath-miR3932b	679.323	-1.98255	-2.04225	0.322922	-6.13942	8.28246e-10	1.60552e-08	785.24	984.998	1509.44	219.349	312.165	264.743	-1.83991	-1.65781	-2.51135
ath-miR393b	8067.62	0.799565	0.820837	0.308838	2.58895	0.00962695	0.0354864	4111.82	7155.81	6229.89	8092.17	10705.1	12110.9	0.976748	0.581112	0.959026
ath-miR394a	16.7217	-0.867879	-0.943798	0.494762	-1.75414	0.0794073	0.183584	15.9724	27.5569	22.4832	13.2939	11.4883	9.53525	-0.264823	-1.26225	-1.23751
ath-miR394b	102.135	-1.38791	-1.46325	0.414951	-3.34476	0.000823536	0.0048263	64.3215	224.941	160.448	55.0746	62.5914	45.4327	-0.223912	-1.84551	-1.82031
ath-miR395e	304.573	-0.082892	-0.100257	0.724179	-0.114463	0.90887	0.942532	241.313	194.18	509.96	57.9233	358.514	465.545	-2.05869	0.884637	-0.131465
ath-miR395f	615.594	0.876292	0.897232	0.290219	3.01942	0.00253262	0.011604	410.535	465.903	413.895	691.282	698.409	1013.54	0.751769	0.584042	1.29207
ath-miR396a	2859.47	-0.586563	-0.601031	0.298443	-1.96541	0.0493666	0.132345	3945.19	2780.04	3614.69	1805.12	2123.75	2888.06	-1.128	-0.388491	-0.32377
ath-miR396b	23497.8	-0.494498	-0.506193	0.291246	-1.69787	0.089532	0.200356	21293.4	31441.7	29999.8	16026.7	19240.1	22985	-0.409929	-0.708563	-0.384258
ath-miR397b	27.4323	0.00291369	-0.0137272	0.481846	0.00604693	0.995175	0.995175	11.6556	40.374	30.6589	30.386	28.5227	22.9968	1.38239	-0.501318	-0.414875
ath-miR398a	505.399	-0.92204	-0.945258	0.302062	-3.05249	0.00226954	0.0108339	531.839	865.157	598.871	320.477	322.861	393.189	-0.730767	-1.42205	-0.607022
ath-miR398b	19281.4	-0.846555	-0.869063	0.308033	-2.74827	0.00599115	0.0232097	17157	33873.1	23728	12667.6	14290.6	13971.9	-0.437649	-1.24507	-0.764055
ath-miR398c	12351.9	-1.05729	-1.08582	0.310407	-3.40613	0.000658902	0.00395341	13259.3	21612.9	15505.2	6176.43	7466.99	10090.5	-1.10216	-1.53329	-0.619752
ath-miR399a	4.22259	0.137305	0.378189	0.77181	0.1779	0.858802	0.917026	436.436	128.812	131.833	221.723	389.81	294.471	-0.977013	1.5975	1.15941
ath-miR399b	163.889	0.270745	0.276057	0.314394	0.861165	0.389147	0.535875	122.168	167.264	155.339	141.01	194.509	203.045	0.206936	0.21771	0.386382
ath-miR399c	310.588	0.508697	0.525211	0.331083	1.53647	0.124424	0.246889	279.734	266.597	217.678	370.804	492.016	236.699	0.406604	0.884046	0.120853
ath-miR400	15.7687	-0.599825	-0.670197	0.563574	-1.06432	0.287182	0.460204	9.06544	32.6837	16.3514	17.5669	11.0921	7.85256	0.954411	-1.55903	-1.05818
ath-miR403	8807.66	-0.566657	-0.582388	0.313718	-1.80626	0.0708774	0.170106	6558.63	13082.5	12043.8	6556.73	7358.05	7246.23	-0.00041804	-0.830238	-0.732994
ath-miR408	12922.4	-0.713197	-0.735776	0.334573	-2.13166	0.0330346	0.0979379	11921.1	20390.2	16132.7	6406.7	9375.24	13308.4	-0.895859	-1.12095	-0.277652
ath-miR4245	61.2238	-1.5983	-1.6671	0.374326	-4.26982	1.95633e-05	0.000197198	66.0482	112.15	101.174	22.7895	32.088	33.0929	-1.53515	-1.80532	-1.61225
ath-miR447a	78.0722	-1.43672	-1.34048	0.390566	-3.67856	0.000234551	0.00168877	231.385	351.19	398.566	146.233	160.44	80.7692	-0.662027	-1.13022	-2.30294
ath-miR447a.2	653.525	-1.41226	-1.47155	0.377125	-3.7448	0.000180537	0.00137865	662.209	1122.14	1097.59	396.917	474.585	167.708	-0.738448	-1.24151	-2.71031
ath-miR472	6.48572	-0.87242	-1.70534	0.657109	-1.32766	0.184289	0.344006	100.583	79.4663	68.4716	26.113	19.8074	30.2884	-1.94555	-2.0043	-1.17674
ath-miR5012	37.266	-0.91892	-0.980105	0.434156	-2.11657	0.0342966	0.0993419	25.9013	67.29	55.1861	22.3147	26.5419	26.3622	-0.215026	-1.34212	-1.06583
ath-miR5020b	20.4921	-1.32134	-1.4088	0.457969	-2.88523	0.00391132	0.0172698	25.4696	30.1203	33.7248	11.3948	9.9037	12.3397	-1.16041	-1.6047	-1.4505
ath-miR5024	17.0878	0.165258	0.192063	0.4858	0.340176	0.733724	0.832876	17.2675	17.3031	13.2855	14.2434	17.4305	22.9968	-0.277762	0.0105807	0.791576
ath-miR5026	15076	0.471304	0.480506	0.26635	1.76949	0.0768119	0.181534	11189.8	13174.1	13401	15318.8	18602.7	18769.3	0.453124	0.497809	0.486033
ath-miR5595a	22.2508	-0.645961	-0.714144	0.490469	-1.31703	0.187829	0.348036	12.9506	35.2471	34.7468	14.7182	19.0151	16.8269	0.184581	-0.890361	-1.04611
ath-miR5634	18.3633	-0.0115065	-0.0336403	0.478025	-0.0240709	0.980796	0.988642	13.3823	19.8666	22.4832	15.6678	21.392	17.3878	0.227473	0.106728	-0.370772
ath-miR5637	5.98122	-0.210036	-1.68782	0.687361	-0.305569	0.759933	0.85122	20.2893	41.0149	37.8127	7.5965	13.0729	10.0961	-1.41731	-1.64957	-1.90506
ath-miR5642b	48.2454	0.168284	0.164811	0.408139	0.412321	0.680104	0.798093	25.9013	61.5223	49.0543	53.6503	57.8376	41.5064	1.05056	-0.0891013	-0.241045
ath-miR5643a	59.2334	-0.727255	-0.752682	0.39196	-1.85543	0.0635344	0.160107	75.977	82.6706	64.3837	27.0625	40.8032	64.5032	-1.48927	-1.01869	0.00267388
ath-miR5645a	21.4217	-0.817886	-0.867473	0.490883	-1.66615	0.0956834	0.208432	26.3329	30.1203	26.5711	8.54606	12.2806	24.6795	-1.62354	-1.29436	-0.106544
ath-miR5645f	5.8997	-0.952291	-0.706251	0.712434	-1.33667	0.181329	0.341008	16.4041	17.3031	28.615	6.64694	15.8459	15.7051	-1.3033	-0.126923	-0.865536
ath-miR5651	17.2151	0.0153232	-0.0180365	0.506971	0.030225	0.975888	0.988642	9.49713	17.944	24.5271	18.5165	18.2228	14.5833	0.963246	0.0222437	-0.750059
ath-miR5652	12.3152	-0.739935	-0.818893	0.539784	-1.3708	0.170437	0.322934	13.3823	15.3806	18.3954	6.17216	9.9037	10.657	-1.11648	-0.63507	-0.787534
ath-miR5654	15.6954	-0.226947	-0.272932	0.554689	-0.409143	0.682435	0.798093	6.47531	25.6343	19.4173	16.1426	15.8459	10.657	1.31785	-0.693963	-0.865536
ath-miR5659	0	NA	-0.592071	NA	NA	NA	NA	11.2239	16.6623	24.5271	8.07128	12.6767	14.0224	-0.475701	-0.394403	-0.806643
ath-miR5663	52.9476	-1.37581	-1.44469	0.391324	-3.51579	0.000438449	0.00297677	47.9173	100.615	83.8011	28.4869	30.5034	26.3622	-0.75025	-1.7218	-1.6685
ath-miR5995b	21.3047	-0.524708	-0.578192	0.486092	-1.07944	0.280391	0.453081	12.9506	33.9654	29.637	18.0417	15.8459	17.3878	0.478312	-1.09996	-0.769321
ath-miR5996	24.1935	-3.34884	-3.16595	0.512943	-6.52868	6.63522e-11	1.67208e-09	212.39	235.195	286.15	27.0625	31.6918	22.9968	-2.97235	-2.89167	-3.63727
ath-miR773a	6.10894	0.776568	0.924984	0.719548	1.07924	0.280479	0.453081	122.168	223.659	151.251	327.599	275.719	340.465	1.42307	0.301897	1.17056
ath-miR775	86.4285	-0.544229	-1.01992	0.360896	-1.50799	0.131556	0.259001	94.5396	128.171	146.141	62.1963	57.4415	62.2596	-0.604089	-1.15791	-1.23099
ath-miR779.2	52.361	-0.491632	-0.53909	0.440713	-1.11554	0.26462	0.440442	28.9231	51.9094	105.262	41.306	43.5763	43.1891	0.51413	-0.252454	-1.28525
ath-miR781a	77.7047	-1.05059	-1.09102	0.342029	-3.07164	0.00212883	0.0107293	83.7474	121.122	112.416	44.1547	58.2338	46.5545	-0.923479	-1.05653	-1.27186
ath-miR781b	83.5426	-1.08549	-1.12254	0.327905	-3.31037	0.000931711	0.00533616	100.152	111.509	131.833	47.0033	54.6684	56.0897	-1.09135	-1.02838	-1.23291
ath-miR8172	2.04051	-1.38669	-1.18328	0.913447	-1.51808	0.128994	NA	25.9013	32.0429	28.615	8.54606	13.8652	15.7051	-1.59969	-1.20854	-0.865536
ath-miR8183	64.0154	3.0716	3.19431	0.410728	7.47842	7.52242e-14	3.7913e-12	11.2239	10.2537	16.3514	79.2885	156.478	110.497	2.82054	3.93175	2.75652
ath-miR822	130.985	0.422388	0.436826	0.40251	1.04938	0.294002	0.465965	49.6441	164.7	119.57	172.346	162.421	117.228	1.79561	-0.0201078	-0.0285418
ath-miR823	60.1043	-0.298176	-0.308439	0.370229	-0.805382	0.420599	0.566797	51.8025	88.4383	59.2739	46.5286	49.5185	65.0641	-0.154905	-0.836704	0.134464
ath-miR824	211.936	-0.374188	-0.390136	0.370551	-1.00981	0.312584	0.483259	134.687	372.979	213.59	208.904	181.04	160.417	0.633233	-1.04279	-0.413024
ath-miR825	376.078	-0.893289	-0.920665	0.315521	-2.83115	0.00463807	0.0191606	349.235	469.107	658.145	233.118	269.777	277.083	-0.583141	-0.798152	-1.24809
ath-miR827	110.027	-1.79536	-1.89138	0.418648	-4.28847	1.7991e-05	0.000188906	92.8128	269.801	157.382	65.045	45.9532	29.1667	-0.512885	-2.55366	-2.43188
ath-miR829	26.3976	0.78235	0.809507	0.461187	1.69638	0.0898133	0.200356	11.2239	21.7891	24.5271	28.0121	28.5227	44.3109	1.31948	0.388499	0.853282
ath-miR833a	18.2824	-0.599543	-0.859252	0.484504	-1.23744	0.215925	0.385908	83.7474	119.84	107.306	59.8224	62.1952	49.359	-0.485358	-0.946237	-1.12035
ath-miR833b	14.527	-0.933741	-0.877241	0.528168	-1.76789	0.0770799	0.181534	82.0206	119.199	108.328	57.9233	61.7991	48.7981	-0.501843	-0.94772	-1.15051
ath-miR837	24.9252	0.560676	0.588644	0.446471	1.2558	0.20919	0.376542	14.6774	25.6343	19.4173	24.2138	29.7111	35.8974	0.722238	0.212927	0.886536
ath-miR838	22.7998	-0.710233	-0.738963	0.453256	-1.56696	0.117124	0.236856	29.3548	32.6837	23.5052	16.1426	12.6767	22.4359	-0.862725	-1.36639	-0.0671701
ath-miR840	35.595	-0.0488976	0.586919	0.39711	-0.123134	0.902001	0.942532	90.6544	118.559	127.746	176.619	167.967	161.538	0.962189	0.502576	0.338604
ath-miR841a	27.2673	-1.84318	-1.97274	0.448208	-4.11233	3.91679e-05	0.00032901	30.2181	42.9374	57.23	10.4452	12.6767	10.0961	-1.53258	-1.76005	-2.50297
ath-miR843	1217.44	1.37724	1.41106	0.290837	4.73546	2.18561e-06	2.8988e-05	747.683	739.549	508.938	1778.06	1515.66	2014.74	1.2498	1.03523	1.98503
ath-miR845a	46948.9	4.14503	4.23216	0.275344	15.054	3.25082e-51	8.19207e-49	4433.86	5598.53	4199.25	76530.9	97652.9	93277.8	4.10941	4.12454	4.47333
ath-miR845b	5.48288	3.64723	5.79119	0.849502	4.29337	1.75979e-05	0.000188906	41.442	37.8106	85.845	2611.77	3736.86	2793.83	5.97779	6.62689	5.02437
ath-miR846	609.365	-0.480451	-0.493737	0.304891	-1.57582	0.115068	0.23575	511.981	874.77	751.144	428.727	552.23	537.339	-0.256031	-0.663634	-0.483255
ath-miR847	12.5895	-1.61279	-1.79623	0.580526	-2.77815	0.00546688	0.0215258	10.7922	24.3526	23.5052	3.32347	5.14992	8.41346	-1.69923	-2.24145	-1.48221
ath-miR848	5.56871	-1.37822	-1.66124	0.725553	-1.89954	0.0574938	0.15251	16.8358	30.7611	27.593	9.02084	6.33837	8.41346	-0.900199	-2.27893	-1.71353
ath-miR850	177.806	-0.223476	-0.235457	0.327803	-0.681739	0.495404	0.643515	136.845	206.997	233.008	182.316	178.663	129.006	0.413899	-0.21237	-0.852936
ath-miR852	56.0168	-1.20024	-1.26073	0.392913	-3.05472	0.00225268	0.0108339	46.1906	105.101	85.845	32.7599	33.6726	32.532	-0.495667	-1.64212	-1.39987
ath-miR857	40.6945	0.0974527	0.10445	0.378034	0.257788	0.79657	0.88042	37.5568	42.2966	37.8127	37.0329	38.4264	51.0416	-0.0202659	-0.138445	0.432805
ath-miR858a	393.797	-0.638713	-0.66357	0.36313	-1.75891	0.0785931	0.183384	255.991	737.627	454.774	332.347	290.376	291.667	0.376598	-1.34497	-0.64083
ath-miR861	26.4976	-0.341734	-0.373663	0.441293	-0.774393	0.438699	0.584932	19.8576	37.1697	32.7028	18.9913	26.1458	24.1186	-0.0643584	-0.50755	-0.439271
ath-miR863	228.834	0.495992	0.503812	0.309667	1.6017	0.109223	0.225608	139.003	189.694	239.14	266.352	279.68	259.134	0.938215	0.560108	0.115848
ath-miR865	59.6162	-0.0741252	-0.0873739	0.369285	-0.200726	0.840913	0.905598	44.0321	66.6491	73.5814	45.579	66.1567	61.6987	0.0498126	-0.0106988	-0.254102
ath-miR866	14.1061	0.550123	0.571458	0.518334	1.06133	0.288541	0.460204	8.20206	11.5354	14.3075	14.7182	16.2421	19.6314	0.843544	0.493664	0.456392
