# Supplementary material for: RBV, an evolutionarily conserved WD40 repeat protein, promotes microRNA biogenesis and loading into ARGONAUTE1 in Arabidopsis
Source: Research Square preprint supplement (doi:10.21203/rs.3.rs-536724/v1), 2021-06-02
Supplement: Supplementary file 14 [file cf24fca0062fdef4017eb9c8.xlsx]

## Sheet: Supplementary Data 5
Supplementary Data 5. The 632 hyper-DEGs in rbv-1 vs. Col.
test_id	gene_id	locus	Col	rbv-1	status	Col_value	rbv-1_value	log2(fold_change)	test_stat	p_value	q_value	significant
AT1G01660	AT1G01660	Chr1:239840-242703	q1	q2	OK	0.31991	2.22144	2.79576	3.33529	5e-05	0.00101408	yes
AT1G01670	AT1G01670	Chr1:242712-246054	q1	q2	OK	0.818608	4.49543	2.45721	3.81075	5e-05	0.00101408	yes
AT1G01760	AT1G01760	Chr1:275187-278599	q1	q2	OK	2.13603	4.62346	1.11404	1.97469	0.00125	0.0148514	yes
AT1G02010	AT1G02010	Chr1:347612-352545	q1	q2	OK	4.6719	11.0068	1.23632	3.15897	5e-05	0.00101408	yes
AT1G02390	AT1G02390	Chr1:480649-483373	q1	q2	OK	1.62426	3.37403	1.05469	2.16679	0.00035	0.00538665	yes
AT1G02400	AT1G02400	Chr1:486799-489651	q1	q2	OK	1.87041	4.12863	1.14231	2.14933	0.00055	0.00772999	yes
AT1G02930	AT1G02930	Chr1:661087-662475	q1	q2	OK	36.4083	72.9776	1.00319	2.86685	5e-05	0.00101408	yes
AT1G03020	AT1G03020	Chr1:697386-698591	q1	q2	OK	2.21592	5.06702	1.19323	1.77154	0.00475	0.0412144	yes
AT1G03180	AT1G03180	Chr1:773357-775362	q1	q2	OK	1.36315	3.9175	1.52299	2.4254	0.0001	0.00186768	yes
AT1G03940	AT1G03940	Chr1:1009227-1011145	q1	q2	OK	2.91129	7.47532	1.36048	3.28695	5e-05	0.00101408	yes
AT1G04310	AT1G04310	Chr1:1154739-1157863	q1	q2	OK	3.44229	7.66583	1.15507	3.05087	5e-05	0.00101408	yes
AT1G04770	AT1G04770	Chr1:1334532-1337849	q1	q2	OK	29.2113	85.8273	1.55491	4.5036	5e-05	0.00101408	yes
AT1G04833	AT1G04833	Chr1:3681678-3684169	q1	q2	OK	9.24312	19.7789	1.09751	2.98162	5e-05	0.00101408	yes
AT1G04980	AT1G04980	Chr1:1413643-1416218	q1	q2	OK	7.5311	15.9846	1.08575	2.99296	5e-05	0.00101408	yes
AT1G05000	AT1G05000	Chr1:1425538-1428869	q1	q2	OK	3.74999	7.80515	1.05754	2.25041	0.0003	0.00471339	yes
AT1G05950	AT1G05950	Chr1:1804400-1807670	q1	q2	OK	1.83888	5.14936	1.48556	3.33518	5e-05	0.00101408	yes
AT1G06000	AT1G06000	Chr1:1820253-1821894	q1	q2	OK	32.612	69.8953	1.09979	2.91782	5e-05	0.00101408	yes
AT1G06160	AT1G06160	Chr1:1882906-1883992	q1	q2	OK	4.09501	8.42225	1.04034	2.20762	0.00025	0.00405464	yes
AT1G07010	AT1G07010	Chr1:2152797-2156153	q1	q2	OK	13.9832	32.5953	1.22097	3.11485	5e-05	0.00101408	yes
AT1G07135	AT1G07135	Chr1:2189876-2190784	q1	q2	OK	145.986	477.992	1.71116	4.56886	5e-05	0.00101408	yes
AT1G07150	AT1G07150	Chr1:2193940-2195996	q1	q2	OK	3.29416	7.78042	1.23994	2.71972	5e-05	0.00101408	yes
AT1G07187	AT1G07187	Chr1:16471281-16471983	q1	q2	OK	5.64125	18.0743	1.67986	3.43546	5e-05	0.00101408	yes
AT1G08477	AT1G08477	Chr1:22973839-22977885	q1	q2	OK	62.4138	186.857	1.582	2.47061	5e-05	0.00101408	yes
AT1G08830	AT1G08830	Chr1:2827059-2841134	q1	q2	OK	21.3017	47.7065	1.16322	2.39713	5e-05	0.00101408	yes
AT1G08930	AT1G08930	Chr1:2873299-2877270	q1	q2	OK	106.644	224.417	1.07338	2.63806	5e-05	0.00101408	yes
AT1G09475	AT1G09475	Chr1:16114946-16116111	q1	q2	OK	2.49522	6.4133	1.3619	2.11242	0.0013	0.0153339	yes
AT1G09932	AT1G09932	Chr1:3230449-3233259	q1	q2	OK	1.35719	3.39588	1.32317	2.13994	0.00045	0.00655982	yes
AT1G09950	AT1G09950	Chr1:3240530-3241863	q1	q2	OK	0.780153	2.03939	1.38631	1.96989	0.00295	0.0288982	yes
AT1G10370	AT1G10370	Chr1:3395550-3398358	q1	q2	OK	13.431	41.4316	1.62517	2.37242	0.00065	0.00888681	yes
AT1G10520	AT1G10520	Chr1:3465925-3469455	q1	q2	OK	0.785221	2.29225	1.5456	2.65649	5e-05	0.00101408	yes
AT1G10522	AT1G10522	Chr1:3469511-3472674	q1	q2	OK	28.5229	57.3937	1.00877	3.0054	5e-05	0.00101408	yes
AT1G11070	AT1G11070	Chr1:3690011-3694200	q1	q2	OK	0.347664	0.946622	1.44509	1.91394	0.0009	0.011376	yes
AT1G12610	AT1G12610	Chr1:4289882-4291017	q1	q2	OK	0.530463	11.6456	4.45639	5.59909	5e-05	0.00101408	yes
AT1G14370	AT1G14370	Chr1:4915490-4921682	q1	q2	OK	4.94979	15.0297	1.60238	1.75588	0.00435	0.0386159	yes
AT1G14480	AT1G14480	Chr1:4956230-4958076	q1	q2	OK	1.61151	3.993	1.30906	2.55936	5e-05	0.00101408	yes
AT1G14600	AT1G14600	Chr1:5000985-5003637	q1	q2	OK	1.64183	4.42042	1.42888	2.56666	0.0002	0.00335767	yes
AT1G14880	AT1G14880	Chr1:5132505-5133860	q1	q2	OK	0.701591	2.5177	1.84341	2.23667	0.0018	0.0197788	yes
AT1G16130	AT1G16130	Chr1:5522601-5528212	q1	q2	OK	1.77267	4.67403	1.39874	2.5836	0.00065	0.00888681	yes
AT1G17040	AT1G17040	Chr1:5824770-5828266	q1	q2	OK	2.61738	5.62961	1.10491	2.75642	5e-05	0.00101408	yes
AT1G17260	AT1G17260	Chr1:5904057-5908898	q1	q2	OK	0.293425	1.0572	1.84919	2.6955	0.0001	0.00186768	yes
AT1G17710	AT1G17710	Chr1:6090404-6092027	q1	q2	OK	0.375101	1.44541	1.94613	1.94195	0.00525	0.044221	yes
AT1G18300	AT1G18300	Chr1:6299668-6301139	q1	q2	OK	10.2626	39.9012	1.95904	4.86514	5e-05	0.00101408	yes
AT1G18400	AT1G18400	Chr1:6331397-6333856	q1	q2	OK	4.19744	18.6397	2.1508	5.00912	5e-05	0.00101408	yes
AT1G18570	AT1G18570	Chr1:6389398-6391386	q1	q2	OK	4.91108	14.1527	1.52697	3.94148	5e-05	0.00101408	yes
AT1G19340	AT1G19340	Chr1:6684466-6687116	q1	q2	OK	1.77648	4.34434	1.29011	2.72843	0.00015	0.00266679	yes
AT1G19380	AT1G19380	Chr1:6697873-6698858	q1	q2	OK	8.8142	31.343	1.83024	4.1922	5e-05	0.00101408	yes
AT1G19450	AT1G19450	Chr1:6731410-6735678	q1	q2	OK	13.5984	28.0696	1.04557	3.10992	5e-05	0.00101408	yes
AT1G20350	AT1G20350	Chr1:7043627-7044592	q1	q2	OK	1.53287	3.97834	1.37593	2.09229	0.00095	0.0118929	yes
AT1G20470	AT1G20470	Chr1:7094007-7097147	q1	q2	OK	5.43193	15.3627	1.4999	2.0126	0.00495	0.042498	yes
AT1G20823	AT1G20823	Chr1:7238692-7239698	q1	q2	OK	6.32562	15.2828	1.27263	2.88758	5e-05	0.00101408	yes
AT1G21460	AT1G21460	Chr1:7508700-7513481	q1	q2	OK	9.31194	25.5374	1.45546	1.93086	0.00585	0.0479152	yes
AT1G23110	AT1G23110	Chr1:8195775-8198331	q1	q2	OK	0.85167	4.01672	2.23765	1.89371	0.00125	0.0148514	yes
AT1G23550	AT1G23550	Chr1:8350727-8354619	q1	q2	OK	1.58151	3.2302	1.03032	1.7064	0.00525	0.044221	yes
AT1G23710	AT1G23710	Chr1:8385187-8386522	q1	q2	OK	26.1209	69.3327	1.40833	4.25888	5e-05	0.00101408	yes
AT1G24090	AT1G24090	Chr1:8520442-8523193	q1	q2	OK	1.34134	2.81532	1.06962	1.91896	0.00195	0.0210261	yes
AT1G24140	AT1G24140	Chr1:8535998-8537780	q1	q2	OK	1.4405	6.22811	2.11223	4.30887	5e-05	0.00101408	yes
AT1G24260	AT1G24260	Chr1:8593535-8596123	q1	q2	OK	2.47981	9.72171	1.97098	4.08551	5e-05	0.00101408	yes
AT1G24265	AT1G24265	Chr1:8600390-8603913	q1	q2	OK	1.89418	4.05119	1.09677	2.10079	0.0005	0.00718182	yes
AT1G24575	AT1G24575	Chr1:8710846-8711578	q1	q2	OK	7.12088	14.797	1.05518	2.25586	0.00015	0.00266679	yes
AT1G25400	AT1G25400	Chr1:8911095-8912822	q1	q2	OK	29.3385	90.9172	1.63176	3.91652	5e-05	0.00101408	yes
AT1G25560	AT1G25560	Chr1:8981555-8983314	q1	q2	OK	36.0614	89.8942	1.31777	3.82932	5e-05	0.00101408	yes
AT1G27110	AT1G27110	Chr1:9412782-9417604	q1	q2	OK	0.528394	1.34667	1.3497	1.77548	0.00165	0.0184093	yes
AT1G27730	AT1G27730	Chr1:9648020-9649323	q1	q2	OK	18.9061	127.946	2.75861	7.88793	5e-05	0.00101408	yes
AT1G27770	AT1G27770	Chr1:9668507-9676307	q1	q2	OK	27.9994	90.8259	1.69771	2.77888	5e-05	0.00101408	yes
AT1G28010	AT1G28010	Chr1:9763210-9768113	q1	q2	OK	1.96686	4.05008	1.04206	2.67875	5e-05	0.00101408	yes
AT1G28370	AT1G28370	Chr1:9955238-9956980	q1	q2	OK	1.88364	10.6652	2.50132	4.62457	5e-05	0.00101408	yes
AT1G29730	AT1G29730	Chr1:10400563-10405913	q1	q2	OK	0.730679	1.50544	1.04288	1.9807	0.0007	0.00939986	yes
AT1G30040	AT1G30040	Chr1:10537456-10540044	q1	q2	OK	3.78836	14.2707	1.91341	4.59223	5e-05	0.00101408	yes
AT1G30160	AT1G30160	Chr1:10606158-10609618	q1	q2	OK	0.713045	3.63856	2.3513	3.73067	5e-05	0.00101408	yes
AT1G30190	AT1G30190	Chr1:10618892-10620067	q1	q2	OK	0.33244	2.18032	2.71337	2.5449	0.0022	0.0229879	yes
AT1G32780	AT1G32780	Chr1:11869751-11872926	q1	q2	OK	1.91765	3.90597	1.02634	2.10392	0.0011	0.0133692	yes
AT1G32920	AT1G32920	Chr1:11928756-11929993	q1	q2	OK	71.7136	165.059	1.20267	3.61334	5e-05	0.00101408	yes
AT1G32928	AT1G32928	Chr1:11931148-11931801	q1	q2	OK	18.6958	52.4261	1.48757	3.82024	5e-05	0.00101408	yes
AT1G33560	AT1G33560	Chr1:12168767-12172119	q1	q2	OK	5.42332	14.1139	1.37987	3.96512	5e-05	0.00101408	yes
AT1G33610	AT1G33610	Chr1:12188014-12190461	q1	q2	OK	5.86809	12.5569	1.09752	2.81464	5e-05	0.00101408	yes
AT1G33720	AT1G33720	Chr1:12220857-12224108	q1	q2	OK	2.3792	6.82945	1.52129	3.49487	5e-05	0.00101408	yes
AT1G33760	AT1G33760	Chr1:12237546-12238710	q1	q2	OK	1.14336	6.99295	2.61262	3.7701	5e-05	0.00101408	yes
AT1G33960	AT1G33960	Chr1:12345962-12348733	q1	q2	OK	0.614093	1.52847	1.31556	1.73566	0.0049	0.0421611	yes
AT1G34180	AT1G34180	Chr1:12448542-12451287	q1	q2	OK	0.486129	1.28038	1.39716	1.7909	0.0016	0.0180467	yes
AT1G34460	AT1G34460	Chr1:12595109-12602379	q1	q2	OK	0.389591	1.45855	1.9045	2.15448	5e-05	0.00101408	yes
AT1G35140	AT1G35140	Chr1:12851982-12853235	q1	q2	OK	54.703	134.882	1.30201	2.52318	5e-05	0.00101408	yes
AT1G35310	AT1G35310	Chr1:12956118-12957090	q1	q2	OK	3.59352	7.70408	1.10023	2.08653	0.00075	0.00992838	yes
AT1G35910	AT1G35910	Chr1:13362961-13365668	q1	q2	OK	0.505258	1.40271	1.47313	1.98412	0.00175	0.0193161	yes
AT1G36180	AT1G36180	Chr1:13545964-13558600	q1	q2	OK	2.33974	6.4444	1.4617	4.27427	5e-05	0.00101408	yes
AT1G36370	AT1G36370	Chr1:13696041-13698739	q1	q2	OK	47.1586	181.16	1.94167	5.25557	5e-05	0.00101408	yes
AT1G43675	AT1G43675	Chr1:16470871-16471248	q1	q2	OK	5.33751	16.086	1.59157	1.96072	0.00375	0.0346557	yes
AT1G44100	AT1G44100	Chr1:16764391-16768674	q1	q2	OK	9.76256	32.4866	1.73452	5.03408	5e-05	0.00101408	yes
AT1G44830	AT1G44830	Chr1:16933698-16934568	q1	q2	OK	0.479847	2.7145	2.50004	2.68864	0.00305	0.029582	yes
AT1G48320	AT1G48320	Chr1:17854059-17855960	q1	q2	OK	11.9677	38.5342	1.68699	3.76435	5e-05	0.00101408	yes
AT1G49920	AT1G49920	Chr1:18481583-18484393	q1	q2	OK	0.139006	1.04847	2.91507	3.07752	0.001	0.0123687	yes
AT1G50180	AT1G50180	Chr1:18583963-18587136	q1	q2	OK	0.42564	1.29258	1.60255	2.633	5e-05	0.00101408	yes
AT1G51270	AT1G51270	Chr1:19007005-19012135	q1	q2	OK	4.42219	9.37997	1.08482	2.75754	5e-05	0.00101408	yes
AT1G51700	AT1G51700	Chr1:19173840-19175228	q1	q2	OK	17.5884	41.0248	1.22187	3.52999	5e-05	0.00101408	yes
AT1G52342	AT1G52342	Chr1:19491766-19493122	q1	q2	OK	12.6066	31.1602	1.30552	3.7151	5e-05	0.00101408	yes
AT1G52570	AT1G52570	Chr1:19583616-19587531	q1	q2	OK	1.50577	3.28183	1.124	2.42417	0.0001	0.00186768	yes
AT1G53090	AT1G53090	Chr1:19783184-19789150	q1	q2	OK	5.79024	13.3764	1.20799	3.34112	5e-05	0.00101408	yes
AT1G55320	AT1G55320	Chr1:20633095-20636892	q1	q2	OK	3.67616	10.1824	1.4698	3.98609	5e-05	0.00101408	yes
AT1G56240	AT1G56240	Chr1:21056098-21057815	q1	q2	OK	0.924311	2.89084	1.64504	2.23804	0.00075	0.00992838	yes
AT1G56250	AT1G56250	Chr1:21061521-21063047	q1	q2	OK	0.189943	1.22642	2.69082	2.15634	0.0054	0.0452703	yes
AT1G56510	AT1G56510	Chr1:21167564-21173632	q1	q2	OK	18.6666	37.8886	1.0213	2.7856	5e-05	0.00101408	yes
AT1G56520	AT1G56520	Chr1:21174608-21179077	q1	q2	OK	5.9058	13.7524	1.21948	3.63749	5e-05	0.00101408	yes
AT1G56540	AT1G56540	Chr1:21181584-21185495	q1	q2	OK	0.928652	3.84267	2.0489	4.36885	5e-05	0.00101408	yes
AT1G58420	AT1G58420	Chr1:21707174-21708125	q1	q2	OK	0.633402	3.27735	2.37134	2.90473	0.0002	0.00335767	yes
AT1G59590	AT1G59590	Chr1:21887587-21888792	q1	q2	OK	4.47933	13.3644	1.57704	3.69453	5e-05	0.00101408	yes
AT1G59660	AT1G59660	Chr1:21923985-21929504	q1	q2	OK	1.36047	4.28439	1.65498	3.91583	5e-05	0.00101408	yes
AT1G60190	AT1G60190	Chr1:22198265-22200687	q1	q2	OK	1.28193	7.7028	2.58706	4.97748	5e-05	0.00101408	yes
AT1G60270	AT1G60270	Chr1:22221574-22224358	q1	q2	OK	5.54347	13.8664	1.32274	3.52574	5e-05	0.00101408	yes
AT1G60590	AT1G60590	Chr1:22314088-22317070	q1	q2	OK	19.7213	40.4215	1.03537	2.88305	5e-05	0.00101408	yes
AT1G61260	AT1G61260	Chr1:22592371-22595338	q1	q2	OK	5.77649	13.3908	1.21298	3.04538	5e-05	0.00101408	yes
AT1G61340	AT1G61340	Chr1:22628263-22630020	q1	q2	OK	4.28953	25.2633	2.55815	5.35769	5e-05	0.00101408	yes
AT1G61470	AT1G61470	Chr1:22678091-22679302	q1	q2	OK	1.50917	5.23206	1.79362	3.23444	5e-05	0.00101408	yes
AT1G62180	AT1G62180	Chr1:22973839-22977885	q1	q2	OK	41.4158	124.133	1.58364	3.81151	5e-05	0.00101408	yes
AT1G62420	AT1G62420	Chr1:23102776-23104756	q1	q2	OK	1.15431	2.78744	1.27191	1.88559	0.0033	0.0313396	yes
AT1G62440	AT1G62440	Chr1:23112932-23115293	q1	q2	OK	0.729807	2.89615	1.98855	3.51801	5e-05	0.00101408	yes
AT1G63750	AT1G63750	Chr1:23650839-23655453	q1	q2	OK	3.7185	11.0722	1.57414	4.04552	5e-05	0.00101408	yes
AT1G64380	AT1G64380	Chr1:23890569-23892193	q1	q2	OK	2.68331	5.40178	1.00942	2.11564	0.00045	0.00655982	yes
AT1G64500	AT1G64500	Chr1:23953098-23954610	q1	q2	OK	5.9675	22.3625	1.90588	5.07863	5e-05	0.00101408	yes
AT1G65060	AT1G65060	Chr1:24167201-24171635	q1	q2	OK	6.22182	30.126	2.2756	6.40157	5e-05	0.00101408	yes
AT1G65150	AT1G65150	Chr1:24203840-24205830	q1	q2	OK	2.91789	8.50982	1.5442	3.36095	5e-05	0.00101408	yes
AT1G65310	AT1G65310	Chr1:24257053-24258506	q1	q2	OK	3.72033	18.0544	2.27885	4.60948	5e-05	0.00101408	yes
AT1G65390	AT1G65390	Chr1:24292371-24294740	q1	q2	OK	2.21478	6.4282	1.53725	2.84414	5e-05	0.00101408	yes
AT1G65480	AT1G65480	Chr1:24331372-24333999	q1	q2	OK	2.84456	9.81122	1.78623	3.22752	5e-05	0.00101408	yes
AT1G65486	AT1G65486	Chr1:24349398-24350524	q1	q2	OK	23.6747	77.274	1.70664	2.87649	5e-05	0.00101408	yes
AT1G65490	AT1G65490	Chr1:24354645-24355490	q1	q2	OK	45.0214	198.668	2.14168	5.65082	5e-05	0.00101408	yes
AT1G65560	AT1G65560	Chr1:24371386-24373823	q1	q2	OK	5.43857	11.6543	1.09957	2.76742	5e-05	0.00101408	yes
AT1G65870	AT1G65870	Chr1:24502875-24504390	q1	q2	OK	1.15688	3.55855	1.62105	2.47217	0.0002	0.00335767	yes
AT1G65950	AT1G65950	Chr1:24546634-24551144	q1	q2	OK	5.18023	11.5275	1.15399	3.09849	5e-05	0.00101408	yes
AT1G66090	AT1G66090	Chr1:24602032-24604763	q1	q2	OK	4.23038	21.1176	2.31959	5.79696	5e-05	0.00101408	yes
AT1G66160	AT1G66160	Chr1:24637195-24638608	q1	q2	OK	6.17703	18.8823	1.61205	3.58849	5e-05	0.00101408	yes
AT1G66230	AT1G66230	Chr1:24677120-24678580	q1	q2	OK	5.18543	10.7202	1.0478	2.53626	5e-05	0.00101408	yes
AT1G66400	AT1G66400	Chr1:24770418-24771393	q1	q2	OK	4.57832	11.0794	1.27499	2.72581	0.0001	0.00186768	yes
AT1G66500	AT1G66500	Chr1:24811079-24812661	q1	q2	OK	5.66463	19.988	1.81908	4.7951	5e-05	0.00101408	yes
AT1G66540	AT1G66540	Chr1:24824355-24826683	q1	q2	OK	4.02064	8.14941	1.01927	2.49772	5e-05	0.00101408	yes
AT1G66920	AT1G66920	Chr1:24965133-24967586	q1	q2	OK	1.91354	5.52634	1.53008	3.50451	5e-05	0.00101408	yes
AT1G67180	AT1G67180	Chr1:25129646-25132283	q1	q2	OK	2.10326	4.28373	1.02624	2.14531	0.0002	0.00335767	yes
AT1G68440	AT1G68440	Chr1:25657756-25659484	q1	q2	OK	30.0506	68.5435	1.18962	3.25144	5e-05	0.00101408	yes
AT1G68840	AT1G68840	Chr1:25880154-25882222	q1	q2	OK	34.7346	96.0542	1.46748	4.15431	5e-05	0.00101408	yes
AT1G69310	AT1G69310	Chr1:26054274-26058383	q1	q2	OK	2.41209	12.89	2.4179	4.80035	5e-05	0.00101408	yes
AT1G69840	AT1G69840	Chr1:26293271-26300684	q1	q2	OK	46.2906	103.559	1.16166	2.23291	0.0003	0.00471339	yes
AT1G70000	AT1G70000	Chr1:26362978-26364878	q1	q2	OK	3.4843	15.4295	2.14675	5.07772	5e-05	0.00101408	yes
AT1G70250	AT1G70250	Chr1:26452846-26456305	q1	q2	OK	2.40491	9.04485	1.91111	4.91116	5e-05	0.00101408	yes
AT1G72240	AT1G72240	Chr1:27190035-27190754	q1	q2	OK	1.45188	4.66145	1.68286	2.33566	0.001	0.0123687	yes
AT1G72520	AT1G72520	Chr1:27308512-27312756	q1	q2	OK	7.69483	18.6142	1.27445	3.65929	5e-05	0.00101408	yes
AT1G72900	AT1G72900	Chr1:27432177-27433782	q1	q2	OK	36.2255	85.5382	1.23956	3.77326	5e-05	0.00101408	yes
AT1G72910	AT1G72910	Chr1:27435305-27437192	q1	q2	OK	25.2317	61.9161	1.29508	3.66769	5e-05	0.00101408	yes
AT1G72920	AT1G72920	Chr1:27437898-27439209	q1	q2	OK	9.82536	41.4248	2.07591	5.60198	5e-05	0.00101408	yes
AT1G72940	AT1G72940	Chr1:27441980-27443859	q1	q2	OK	13.93	50.8531	1.86814	5.48152	5e-05	0.00101408	yes
AT1G73010	AT1G73010	Chr1:27464527-27466348	q1	q2	OK	1.05187	6.14958	2.54754	4.34775	5e-05	0.00101408	yes
AT1G73500	AT1G73500	Chr1:27639090-27640643	q1	q2	OK	19.6608	44.9593	1.1933	3.61168	5e-05	0.00101408	yes
AT1G73540	AT1G73540	Chr1:27645551-27646743	q1	q2	OK	32.9719	113.22	1.77982	5.03122	5e-05	0.00101408	yes
AT1G73805	AT1G73805	Chr1:27744648-27749248	q1	q2	OK	1.84476	6.37385	1.78874	3.0747	5e-05	0.00101408	yes
AT1G73830	AT1G73830	Chr1:27759940-27761588	q1	q2	OK	5.85064	17.3499	1.56826	3.57238	5e-05	0.00101408	yes
AT1G74930	AT1G74930	Chr1:28143850-28145058	q1	q2	OK	12.9651	36.1802	1.48056	3.62233	5e-05	0.00101408	yes
AT1G75000	AT1G75000	Chr1:28161035-28164814	q1	q2	OK	2.3091	5.44178	1.23675	2.51954	5e-05	0.00101408	yes
AT1G75020	AT1G75020	Chr1:28170751-28173678	q1	q2	OK	8.0051	18.1101	1.17781	3.25188	5e-05	0.00101408	yes
AT1G75040	AT1G75040	Chr1:28177669-28179022	q1	q2	OK	9.52915	23.2143	1.28459	3.36423	5e-05	0.00101408	yes
AT1G76650	AT1G76650	Chr1:28766749-28768138	q1	q2	OK	14.08	96.8618	2.78228	6.77093	5e-05	0.00101408	yes
AT1G76820	AT1G76820	Chr1:28837572-28842566	q1	q2	OK	2.25389	4.84499	1.10408	2.93371	5e-05	0.00101408	yes
AT1G76930	AT1G76930	Chr1:28895300-28897120	q1	q2	OK	77.776	180.868	1.21754	3.659	5e-05	0.00101408	yes
AT1G76960	AT1G76960	Chr1:28920316-28920976	q1	q2	OK	67.9909	140.876	1.05101	3.12817	5e-05	0.00101408	yes
AT1G77010	AT1G77010	Chr1:28942709-28944827	q1	q2	OK	0.500251	1.18398	1.24292	1.86822	0.00285	0.0281438	yes
AT1G77320	AT1G77320	Chr1:29051497-29065221	q1	q2	OK	2.31642	4.73761	1.03226	1.86577	0.0028	0.0277479	yes
AT1G77640	AT1G77640	Chr1:29178704-29179877	q1	q2	OK	0.73513	3.25551	2.14681	2.94517	5e-05	0.00101408	yes
AT1G77890	AT1G77890	Chr1:29292074-29296407	q1	q2	OK	4.20298	12.4371	1.56516	3.9369	5e-05	0.00101408	yes
AT1G78290	AT1G78290	Chr1:29452554-29459493	q1	q2	OK	3.51562	14.592	2.05333	2.52073	0.0002	0.00335767	yes
AT1G78410	AT1G78410	Chr1:29502505-29503938	q1	q2	OK	1.55998	6.30784	2.01562	3.10507	5e-05	0.00101408	yes
AT1G78510	AT1G78510	Chr1:29531466-29537482	q1	q2	OK	12.7572	28.9751	1.1835	3.55271	5e-05	0.00101408	yes
AT1G78570	AT1G78570	Chr1:29549539-29560912	q1	q2	OK	34.8862	104.672	1.58515	3.82898	5e-05	0.00101408	yes
AT1G78750	AT1G78750	Chr1:29612903-29614884	q1	q2	OK	0.68002	2.25975	1.73252	2.71718	5e-05	0.00101408	yes
AT1G78960	AT1G78960	Chr1:29696393-29701439	q1	q2	OK	3.10391	7.20471	1.21485	3.15041	5e-05	0.00101408	yes
AT1G78990	AT1G78990	Chr1:29713315-29715017	q1	q2	OK	3.64678	7.46561	1.03364	2.46206	5e-05	0.00101408	yes
AT1G80840	AT1G80840	Chr1:30383560-30387602	q1	q2	OK	15.9588	71.2397	2.15833	5.12528	5e-05	0.00101408	yes
AT2G01180	AT2G01180	Chr2:106620-108829	q1	q2	OK	20.311	41.2442	1.02193	2.73196	5e-05	0.00101408	yes
AT2G01300	AT2G01300	Chr2:150687-151971	q1	q2	OK	3.08437	10.7993	1.80789	3.21921	5e-05	0.00101408	yes
AT2G01980	AT2G01980	Chr2:457001-463762	q1	q2	OK	5.05408	10.4564	1.04886	3.12015	5e-05	0.00101408	yes
AT2G03260	AT2G03260	Chr2:987933-992332	q1	q2	OK	0.534314	1.29021	1.27184	1.89736	0.0016	0.0180467	yes
AT2G06005	AT2G06005	Chr2:2331931-2336257	q1	q2	OK	2.73688	6.60926	1.27196	2.73861	5e-05	0.00101408	yes
AT2G06895	AT2G06895	Chr2:7524679-7525374	q1	q2	OK	2.58563	8.64787	1.74183	2.35688	0.00035	0.00538665	yes
AT2G07042	AT2G07042	Chr2:2919887-2922387	q1	q2	OK	2.55522	5.15461	1.01241	1.82253	0.0026	0.0262844	yes
AT2G11810	AT2G11810	Chr2:4743161-4747373	q1	q2	OK	1.14723	2.75574	1.26428	2.02225	0.0005	0.00718182	yes
AT2G15020	AT2G15020	Chr2:6491424-6493512	q1	q2	OK	0.809727	4.07389	2.3309	4.28651	5e-05	0.00101408	yes
AT2G16570	AT2G16570	Chr2:7180141-7182287	q1	q2	OK	0.731807	1.82699	1.31993	2.27592	0.00015	0.00266679	yes
AT2G16890	AT2G16890	Chr2:7316788-7319243	q1	q2	OK	1.95253	4.42015	1.17875	2.43149	5e-05	0.00101408	yes
AT2G17040	AT2G17040	Chr2:7406910-7408393	q1	q2	OK	2.91525	13.6808	2.23046	4.90776	5e-05	0.00101408	yes
AT2G18100	AT2G18100	Chr2:7867827-7871801	q1	q2	OK	0.766046	2.06547	1.43096	2.32184	0.0002	0.00335767	yes
AT2G18120	AT2G18120	Chr2:7876543-7878072	q1	q2	OK	1.32171	6.30839	2.25487	3.839	5e-05	0.00101408	yes
AT2G18230	AT2G18230	Chr2:7928014-7934353	q1	q2	OK	29.2079	65.7387	1.17039	2.6128	0.0001	0.00186768	yes
AT2G18600	AT2G18600	Chr2:8073166-8075092	q1	q2	OK	1.70794	4.89892	1.52021	2.38262	5e-05	0.00101408	yes
AT2G18690	AT2G18690	Chr2:8097419-8099393	q1	q2	OK	3.32786	7.56914	1.18554	2.7189	5e-05	0.00101408	yes
AT2G19650	AT2G19650	Chr2:8493468-8495892	q1	q2	OK	1.08972	2.78125	1.35177	2.66658	0.0001	0.00186768	yes
AT2G20110	AT2G20110	Chr2:8683978-8687283	q1	q2	OK	1.60617	3.45994	1.10712	2.36715	0.00025	0.00405464	yes
AT2G20142	AT2G20142	Chr2:8695373-8696643	q1	q2	OK	0.907312	7.52076	3.05121	4.41632	5e-05	0.00101408	yes
AT2G20210	AT2G20210	Chr2:8720789-8725127	q1	q2	OK	2.72089	6.2262	1.19427	2.90836	5e-05	0.00101408	yes
AT2G20800	AT2G20800	Chr2:8953056-8955831	q1	q2	OK	0.149873	1.36531	3.18742	3.43218	0.0043	0.0384508	yes
AT2G21320	AT2G21320	Chr2:9126262-9127987	q1	q2	OK	2.89498	6.89414	1.25182	2.49952	5e-05	0.00101408	yes
AT2G21640	AT2G21640	Chr2:9254377-9255743	q1	q2	OK	15.2714	45.2382	1.56671	4.11644	5e-05	0.00101408	yes
AT2G22500	AT2G22500	Chr2:9562773-9564850	q1	q2	OK	14.1561	44.9069	1.66551	4.7818	5e-05	0.00101408	yes
AT2G22650	AT2G22650	Chr2:9624504-9627072	q1	q2	OK	6.45722	17.9737	1.47691	3.98853	5e-05	0.00101408	yes
AT2G23000	AT2G23000	Chr2:9791891-9796408	q1	q2	OK	7.99683	26.9624	1.75345	4.9307	5e-05	0.00101408	yes
AT2G23690	AT2G23690	Chr2:10072056-10073126	q1	q2	OK	3.76946	7.80034	1.04918	2.00586	0.00055	0.00772999	yes
AT2G23810	AT2G23810	Chr2:10135604-10137595	q1	q2	OK	89.2912	237.052	1.40861	3.92704	5e-05	0.00101408	yes
AT2G24545	AT2G24545	Chr2:10424687-10427683	q1	q2	OK	2.48258	7.30619	1.55728	2.61374	0.0001	0.00186768	yes
AT2G24600	AT2G24600	Chr2:10452033-10454593	q1	q2	OK	7.7961	20.9625	1.42699	3.5849	5e-05	0.00101408	yes
AT2G24945	AT2G24945	Chr2:10610832-10612232	q1	q2	OK	3.3563	7.63923	1.18656	2.66683	5e-05	0.00101408	yes
AT2G25460	AT2G25460	Chr2:10832577-10835660	q1	q2	OK	1.08076	5.33432	2.30325	4.8993	5e-05	0.00101408	yes
AT2G25530	AT2G25530	Chr2:10863058-10872243	q1	q2	OK	2.65835	7.07541	1.41228	3.47034	5e-05	0.00101408	yes
AT2G25735	AT2G25735	Chr2:10974654-10975916	q1	q2	OK	7.78923	18.3376	1.23525	3.10416	5e-05	0.00101408	yes
AT2G26080	AT2G26080	Chr2:11109002-11114291	q1	q2	OK	138.41	287.035	1.05228	2.96589	5e-05	0.00101408	yes
AT2G26190	AT2G26190	Chr2:11147580-11150754	q1	q2	OK	22.2866	46.3089	1.05511	3.16945	5e-05	0.00101408	yes
AT2G26530	AT2G26530	Chr2:11282662-11284272	q1	q2	OK	22.8713	47.6795	1.05983	3.17652	5e-05	0.00101408	yes
AT2G27420	AT2G27420	Chr2:11726133-11727654	q1	q2	OK	1.45835	7.15206	2.29403	4.28927	5e-05	0.00101408	yes
AT2G28140	AT2G28140	Chr2:11994953-11996236	q1	q2	OK	2.2889	4.99932	1.12708	2.16008	0.00075	0.00992838	yes
AT2G28190	AT2G28190	Chr2:12014411-12016569	q1	q2	OK	11.9424	71.7834	2.58755	7.21281	5e-05	0.00101408	yes
AT2G28500	AT2G28500	Chr2:12186273-12188293	q1	q2	OK	3.12198	7.27629	1.22074	2.52225	0.0002	0.00335767	yes
AT2G29090	AT2G29090	Chr2:12494825-12499723	q1	q2	OK	2.64032	10.8245	2.03552	4.68946	5e-05	0.00101408	yes
AT2G29320	AT2G29320	Chr2:12592128-12593803	q1	q2	OK	20.2259	41.5522	1.03872	3.13639	5e-05	0.00101408	yes
AT2G30020	AT2G30020	Chr2:12814270-12816360	q1	q2	OK	9.20497	40.7685	2.14697	5.47141	5e-05	0.00101408	yes
AT2G30040	AT2G30040	Chr2:12821568-12823169	q1	q2	OK	5.94309	12.891	1.11708	2.866	5e-05	0.00101408	yes
AT2G31250	AT2G31250	Chr2:13319620-13321597	q1	q2	OK	0.358522	1.10773	1.62747	2.04372	0.00205	0.0218162	yes
AT2G32030	AT2G32030	Chr2:13632096-13633551	q1	q2	OK	1.61336	5.59259	1.79345	3.05658	5e-05	0.00101408	yes
AT2G32140	AT2G32140	Chr2:13655561-13657369	q1	q2	OK	0.747368	2.14296	1.51972	2.30618	0.00055	0.00772999	yes
AT2G32200	AT2G32200	Chr2:13676388-13677306	q1	q2	OK	2.9935	9.27931	1.63219	2.18778	0.0006	0.00830169	yes
AT2G32210	AT2G32210	Chr2:13677985-13678906	q1	q2	OK	6.98228	17.786	1.34897	2.53331	5e-05	0.00101408	yes
AT2G32530	AT2G32530	Chr2:13809018-13813572	q1	q2	OK	3.99708	13.1715	1.7204	4.76394	5e-05	0.00101408	yes
AT2G32540	AT2G32540	Chr2:13814381-13818410	q1	q2	OK	4.22346	16.1939	1.93895	5.41141	5e-05	0.00101408	yes
AT2G32940	AT2G32940	Chr2:13971915-13977521	q1	q2	OK	0.517731	1.14547	1.14566	2.00914	0.00125	0.0148514	yes
AT2G33580	AT2G33580	Chr2:14219480-14222254	q1	q2	OK	3.00183	8.08507	1.42942	3.73811	5e-05	0.00101408	yes
AT2G35340	AT2G35340	Chr2:14872264-14879739	q1	q2	OK	2.8159	6.66943	1.24397	3.34002	5e-05	0.00101408	yes
AT2G35550	AT2G35550	Chr2:14929242-14933175	q1	q2	OK	0.648702	1.80739	1.47828	1.66397	0.00285	0.0281438	yes
AT2G35710	AT2G35710	Chr2:15010706-15014284	q1	q2	OK	2.65915	8.44087	1.66643	3.31186	5e-05	0.00101408	yes
AT2G35930	AT2G35930	Chr2:15082854-15084559	q1	q2	OK	5.75388	29.2809	2.34735	6.13993	5e-05	0.00101408	yes
AT2G35950	AT2G35950	Chr2:15104715-15106119	q1	q2	OK	0.721619	2.43131	1.75243	2.08263	0.0019	0.0205776	yes
AT2G36080	AT2G36080	Chr2:15148258-15151634	q1	q2	OK	3.48982	12.3531	1.82365	4.1352	5e-05	0.00101408	yes
AT2G36370	AT2G36370	Chr2:15247767-15252980	q1	q2	OK	2.31294	5.62408	1.28189	3.27369	5e-05	0.00101408	yes
AT2G36885	AT2G36885	Chr2:15482002-15483788	q1	q2	OK	16.824	39.4277	1.22869	3.50211	5e-05	0.00101408	yes
AT2G37040	AT2G37040	Chr2:15557366-15560755	q1	q2	OK	41.8244	124.496	1.57368	4.69926	5e-05	0.00101408	yes
AT2G37430	AT2G37430	Chr2:15706284-15707224	q1	q2	OK	0.42351	3.45657	3.02887	2.84414	0.00025	0.00405464	yes
AT2G37970	AT2G37970	Chr2:15890619-15891704	q1	q2	OK	30.2159	63.2358	1.06544	3.14002	5e-05	0.00101408	yes
AT2G38210	AT2G38210	Chr2:15999925-16007722	q1	q2	OK	25.9172	73.0295	1.49457	3.99243	5e-05	0.00101408	yes
AT2G38250	AT2G38250	Chr2:16018209-16020722	q1	q2	OK	1.36005	3.21031	1.23906	2.26162	0.0003	0.00471339	yes
AT2G38470	AT2G38470	Chr2:16108234-16111911	q1	q2	OK	26.7035	105.799	1.98623	5.60972	5e-05	0.00101408	yes
AT2G38940	AT2G38940	Chr2:16257156-16260253	q1	q2	OK	3.64021	7.51714	1.04616	2.63883	5e-05	0.00101408	yes
AT2G39650	AT2G39650	Chr2:16527729-16529494	q1	q2	OK	4.73353	30.9326	2.70814	6.99618	5e-05	0.00101408	yes
AT2G39980	AT2G39980	Chr2:16687672-16690182	q1	q2	OK	6.91022	15.7982	1.19296	3.36065	5e-05	0.00101408	yes
AT2G40000	AT2G40000	Chr2:16700489-16702336	q1	q2	OK	142.177	335.558	1.23887	3.21293	5e-05	0.00101408	yes
AT2G40100	AT2G40100	Chr2:16745627-16747424	q1	q2	OK	21.1716	71.1432	1.74859	5.22503	5e-05	0.00101408	yes
AT2G40140	AT2G40140	Chr2:16771996-16774734	q1	q2	OK	28.0132	104.683	1.90185	5.53922	5e-05	0.00101408	yes
AT2G40150	AT2G40150	Chr2:16775423-16777243	q1	q2	OK	3.23285	6.58398	1.02615	2.28535	0.00015	0.00266679	yes
AT2G41010	AT2G41010	Chr2:17113797-17115047	q1	q2	OK	6.49112	20.5409	1.66196	4.0523	5e-05	0.00101408	yes
AT2G41410	AT2G41410	Chr2:17261727-17263017	q1	q2	OK	58.5651	149.294	1.35005	3.91621	5e-05	0.00101408	yes
AT2G42640	AT2G42640	Chr2:17758531-17764185	q1	q2	OK	1.63704	3.33082	1.02478	2.29024	0.00015	0.00266679	yes
AT2G42980	AT2G42980	Chr2:17875004-17876779	q1	q2	OK	0.321201	0.990796	1.62511	2.01811	0.0048	0.0415011	yes
AT2G43290	AT2G43290	Chr2:17991051-17992047	q1	q2	OK	35.4112	72.1289	1.02637	2.87768	5e-05	0.00101408	yes
AT2G44080	AT2G44080	Chr2:18236788-18238173	q1	q2	OK	3.05445	11.9612	1.96938	4.3946	5e-05	0.00101408	yes
AT2G44460	AT2G44460	Chr2:18346305-18350026	q1	q2	OK	0.747769	2.2648	1.59872	2.58146	0.0004	0.00598686	yes
AT2G44840	AT2G44840	Chr2:18495214-18496327	q1	q2	OK	3.92408	14.9645	1.93111	4.27907	5e-05	0.00101408	yes
AT2G46400	AT2G46400	Chr2:19043410-19044955	q1	q2	OK	1.20161	10.253	3.093	5.70749	5e-05	0.00101408	yes
AT2G46450	AT2G46450	Chr2:19065535-19071083	q1	q2	OK	8.32578	17.9129	1.10534	3.26217	5e-05	0.00101408	yes
AT2G46600	AT2G46600	Chr2:19136018-19138762	q1	q2	OK	153.482	346.967	1.17673	3.30629	5e-05	0.00101408	yes
AT2G47050	AT2G47050	Chr2:19331544-19332659	q1	q2	OK	0.422735	3.64862	3.10953	3.73913	0.00025	0.00405464	yes
AT2G47270	AT2G47270	Chr2:19411429-19412328	q1	q2	OK	1.91535	6.9782	1.86525	3.15271	5e-05	0.00101408	yes
AT3G01600	AT3G01600	Chr3:229074-231517	q1	q2	OK	0.497657	3.12181	2.64916	3.85708	5e-05	0.00101408	yes
AT3G02040	AT3G02040	Chr3:344907-350010	q1	q2	OK	16.5583	77.0694	2.2186	4.51429	5e-05	0.00101408	yes
AT3G02140	AT3G02140	Chr3:385236-387051	q1	q2	OK	5.65063	22.0775	1.96609	4.59383	5e-05	0.00101408	yes
AT3G02310	AT3G02310	Chr3:464278-467151	q1	q2	OK	0.477357	3.72102	2.96256	4.06652	5e-05	0.00101408	yes
AT3G03030	AT3G03030	Chr3:682053-684083	q1	q2	OK	2.92197	6.39118	1.12914	2.66431	5e-05	0.00101408	yes
AT3G03060	AT3G03060	Chr3:691933-695675	q1	q2	OK	2.67233	5.71147	1.09576	2.69533	5e-05	0.00101408	yes
AT3G05320	AT3G05320	Chr3:1510159-1515568	q1	q2	OK	1.81653	4.50601	1.31067	2.52471	0.0001	0.00186768	yes
AT3G05327	AT3G05327	Chr3:1517408-1518599	q1	q2	OK	0.508163	1.46561	1.52814	1.6221	0.00585	0.0479152	yes
AT3G05400	AT3G05400	Chr3:1549445-1554219	q1	q2	OK	3.78569	9.37236	1.30786	3.33	5e-05	0.00101408	yes
AT3G06145	AT3G06145	Chr3:1859821-1860797	q1	q2	OK	7.18911	15.6562	1.12285	2.70488	5e-05	0.00101408	yes
AT3G06630	AT3G06630	Chr3:2068967-2074087	q1	q2	OK	0.725036	2.31072	1.67222	3.21686	5e-05	0.00101408	yes
AT3G08720	AT3G08720	Chr3:2647189-2651231	q1	q2	OK	9.40186	23.749	1.33685	3.73852	5e-05	0.00101408	yes
AT3G09370	AT3G09370	Chr3:2879352-2882396	q1	q2	OK	4.55618	11.0206	1.27431	3.39303	5e-05	0.00101408	yes
AT3G09600	AT3G09600	Chr3:2946238-2949017	q1	q2	OK	0.662618	2.22876	1.74999	2.3805	5e-05	0.00101408	yes
AT3G09870	AT3G09870	Chr3:3027423-3027961	q1	q2	OK	1.63026	13.9549	3.0976	3.79125	5e-05	0.00101408	yes
AT3G09922	AT3G09922	Chr3:3050988-3051530	q1	q2	OK	1.54417	6.66874	2.11058	2.27112	0.00135	0.0157342	yes
AT3G10930	AT3G10930	Chr3:3420080-3420932	q1	q2	OK	3.93744	21.0049	2.41539	4.98062	5e-05	0.00101408	yes
AT3G14770	AT3G14770	Chr3:4957333-4959704	q1	q2	OK	4.06971	8.77766	1.10891	2.74204	5e-05	0.00101408	yes
AT3G14900	AT3G14900	Chr3:5013290-5015342	q1	q2	OK	10.9351	25.891	1.24348	3.71607	5e-05	0.00101408	yes
AT3G15210	AT3G15210	Chr3:5121302-5122562	q1	q2	OK	49.1538	124.501	1.34078	3.90066	5e-05	0.00101408	yes
AT3G15354	AT3G15354	Chr3:5166174-5173105	q1	q2	OK	13.6269	27.7809	1.02764	2.34059	5e-05	0.00101408	yes
AT3G15356	AT3G15356	Chr3:5174401-5175523	q1	q2	OK	20.1428	54.2511	1.42939	3.77038	5e-05	0.00101408	yes
AT3G15720	AT3G15720	Chr3:5325126-5327672	q1	q2	OK	1.55745	5.27836	1.7609	3.14899	5e-05	0.00101408	yes
AT3G15760	AT3G15760	Chr3:5337474-5338562	q1	q2	OK	8.309	19.3223	1.21752	3.05313	5e-05	0.00101408	yes
AT3G16360	AT3G16360	Chr3:5554196-5555789	q1	q2	OK	4.1953	15.7884	1.91202	3.47975	5e-05	0.00101408	yes
AT3G16660	AT3G16660	Chr3:5676748-5678099	q1	q2	OK	40.078	111.844	1.4806	4.5553	5e-05	0.00101408	yes
AT3G16720	AT3G16720	Chr3:5692606-5694181	q1	q2	OK	16.7181	50.1575	1.58505	4.7774	5e-05	0.00101408	yes
AT3G16750	AT3G16750	Chr3:5700997-5702598	q1	q2	OK	7.11339	14.6082	1.03817	2.6721	5e-05	0.00101408	yes
AT3G17050	AT3G17050	Chr3:5814747-5816592	q1	q2	OK	1.01986	2.24046	1.13542	1.69079	0.00515	0.0438309	yes
AT3G17609	AT3G17609	Chr3:6023843-6024710	q1	q2	OK	13.0814	44.448	1.7646	4.3825	5e-05	0.00101408	yes
AT3G17790	AT3G17790	Chr3:6089380-6093151	q1	q2	OK	9.20103	29.8098	1.69592	2.13041	0.00085	0.0108987	yes
AT3G17830	AT3G17830	Chr3:6101752-6104805	q1	q2	OK	4.33669	9.25769	1.09406	2.8592	5e-05	0.00101408	yes
AT3G18610	AT3G18610	Chr3:6404052-6407946	q1	q2	OK	0.338525	1.59763	2.2386	2.93892	5e-05	0.00101408	yes
AT3G19470	AT3G19470	Chr3:6749431-6751083	q1	q2	OK	1.79849	4.33669	1.26981	2.47627	5e-05	0.00101408	yes
AT3G19550	AT3G19550	Chr3:6787126-6788424	q1	q2	OK	1.37149	5.75584	2.06928	3.23609	5e-05	0.00101408	yes
AT3G19580	AT3G19580	Chr3:6802902-6804296	q1	q2	OK	5.03135	10.7404	1.09403	2.65358	5e-05	0.00101408	yes
AT3G19970	AT3G19970	Chr3:6958508-6961684	q1	q2	OK	4.12187	9.68686	1.23273	3.0194	5e-05	0.00101408	yes
AT3G21010	AT3G21010	Chr3:7366209-7367748	q1	q2	OK	0.950215	2.33567	1.29751	2.14973	0.0007	0.00939986	yes
AT3G21530	AT3G21530	Chr3:7581958-7585856	q1	q2	OK	3.08006	6.38816	1.05244	2.32008	0.0003	0.00471339	yes
AT3G21870	AT3G21870	Chr3:7703798-7704958	q1	q2	OK	10.092	23.7112	1.23235	3.06026	5e-05	0.00101408	yes
AT3G22550	AT3G22550	Chr3:7991402-7994087	q1	q2	OK	6.00812	12.5967	1.06806	2.82142	5e-05	0.00101408	yes
AT3G22830	AT3G22830	Chr3:8078788-8081059	q1	q2	OK	1.16231	2.76396	1.24974	2.13326	0.00035	0.00538665	yes
AT3G22840	AT3G22840	Chr3:8084404-8085669	q1	q2	OK	3.17597	27.1876	3.09767	6.50346	5e-05	0.00101408	yes
AT3G22910	AT3G22910	Chr3:8116291-8119490	q1	q2	OK	0.705758	2.64392	1.90543	3.5417	5e-05	0.00101408	yes
AT3G23170	AT3G23170	Chr3:8267875-8268961	q1	q2	OK	12.2687	28.1765	1.1995	3.23784	5e-05	0.00101408	yes
AT3G23210	AT3G23210	Chr3:8283002-8285081	q1	q2	OK	2.71378	7.38219	1.44374	3.0973	5e-05	0.00101408	yes
AT3G23250	AT3G23250	Chr3:8309208-8310910	q1	q2	OK	0.235209	2.04669	3.12128	2.59707	0.0028	0.0277479	yes
AT3G23370	AT3G23370	Chr3:8357568-8361171	q1	q2	OK	0.623054	1.55092	1.3157	2.22581	0.00025	0.00405464	yes
AT3G23510	AT3G23510	Chr3:8427556-8433340	q1	q2	OK	0.59805	1.50788	1.33418	2.47213	0.0003	0.00471339	yes
AT3G24190	AT3G24190	Chr3:8743112-8751685	q1	q2	OK	28.5596	71.8791	1.33159	3.5651	5e-05	0.00101408	yes
AT3G24460	AT3G24460	Chr3:8885817-8893859	q1	q2	OK	1.61111	8.25494	2.3572	5.08886	5e-05	0.00101408	yes
AT3G25510	AT3G25510	Chr3:9263794-9268972	q1	q2	OK	0.196941	1.50469	2.93363	4.45111	5e-05	0.00101408	yes
AT3G25600	AT3G25600	Chr3:9306775-9307967	q1	q2	OK	15.7765	37.723	1.25767	3.61616	5e-05	0.00101408	yes
AT3G26320	AT3G26320	Chr3:9642881-9646093	q1	q2	OK	1.11541	4.6951	2.07358	3.74396	5e-05	0.00101408	yes
AT3G26500	AT3G26500	Chr3:9707799-9710100	q1	q2	OK	1.27358	2.7295	1.09975	2.06966	0.00065	0.00888681	yes
AT3G27640	AT3G27640	Chr3:10232241-10235640	q1	q2	OK	1.14126	2.35842	1.04719	1.9388	0.0017	0.0188491	yes
AT3G28080	AT3G28080	Chr3:10451402-10455323	q1	q2	OK	15.4688	35.4159	1.19504	3.24553	5e-05	0.00101408	yes
AT3G28160	AT3G28160	Chr3:10494655-10496814	q1	q2	OK	8.93833	19.2	1.10303	3.07366	5e-05	0.00101408	yes
AT3G28340	AT3G28340	Chr3:10588151-10590685	q1	q2	OK	1.63945	8.11754	2.30783	4.76468	5e-05	0.00101408	yes
AT3G28500	AT3G28500	Chr3:10681048-10682979	q1	q2	OK	1.25213	9.95021	2.99034	4.81356	5e-05	0.00101408	yes
AT3G28540	AT3G28540	Chr3:10694174-10696249	q1	q2	OK	1.86149	3.84805	1.04766	2.1874	0.0002	0.00335767	yes
AT3G29000	AT3G29000	Chr3:11005637-11006514	q1	q2	OK	2.47391	21.2832	3.10485	5.88052	5e-05	0.00101408	yes
AT3G29590	AT3G29590	Chr3:11397740-11400332	q1	q2	OK	2.23696	9.59606	2.1009	4.77039	5e-05	0.00101408	yes
AT3G30122	AT3G30122	Chr3:11758477-11761130	q1	q2	OK	1.61033	3.26386	1.01922	1.77682	0.00185	0.0201698	yes
AT3G30460	AT3G30460	Chr3:12104311-12105111	q1	q2	OK	3.57	8.10741	1.18332	2.10298	0.0006	0.00830169	yes
AT3G42658	AT3G42658	Chr3:14749399-14750294	q1	q2	OK	1.09942	2.84614	1.37226	1.88423	0.00285	0.0281438	yes
AT3G44120	AT3G44120	Chr3:15878398-15879830	q1	q2	OK	0.325129	2.15897	2.73126	3.1267	0.00025	0.00405464	yes
AT3G44260	AT3G44260	Chr3:15952007-15954365	q1	q2	OK	24.605	83.4097	1.76127	5.00686	5e-05	0.00101408	yes
AT3G44400	AT3G44400	Chr3:16044661-16049803	q1	q2	OK	1.56978	4.21035	1.42337	3.38845	5e-05	0.00101408	yes
AT3G44630	AT3G44630	Chr3:16195847-16201225	q1	q2	OK	16.1129	49.4397	1.61745	4.49584	5e-05	0.00101408	yes
AT3G44970	AT3G44970	Chr3:16432285-16435778	q1	q2	OK	5.7831	24.5809	2.08762	5.8751	5e-05	0.00101408	yes
AT3G45640	AT3G45640	Chr3:16756570-16758874	q1	q2	OK	57.2225	137.96	1.26959	3.53217	5e-05	0.00101408	yes
AT3G45730	AT3G45730	Chr3:16789779-16790690	q1	q2	OK	9.29664	21.2388	1.19192	2.80445	5e-05	0.00101408	yes
AT3G45960	AT3G45960	Chr3:16892701-16894153	q1	q2	OK	0.519327	1.41584	1.44694	1.72389	0.0048	0.0415011	yes
AT3G46090	AT3G46090	Chr3:16925880-16926883	q1	q2	OK	1.80345	25.8033	3.83872	6.69656	5e-05	0.00101408	yes
AT3G46620	AT3G46620	Chr3:17178446-17180559	q1	q2	OK	18.6741	52.122	1.48085	4.06439	5e-05	0.00101408	yes
AT3G47420	AT3G47420	Chr3:17472296-17475274	q1	q2	OK	4.25872	15.0808	1.82422	4.88278	5e-05	0.00101408	yes
AT3G47540	AT3G47540	Chr3:17520411-17522624	q1	q2	OK	4.92697	10.1835	1.04747	2.50488	0.0001	0.00186768	yes
AT3G47570	AT3G47570	Chr3:17527506-17531041	q1	q2	OK	3.89593	8.94909	1.19977	3.30876	5e-05	0.00101408	yes
AT3G47580	AT3G47580	Chr3:17532611-17537580	q1	q2	OK	1.71699	3.99066	1.21674	2.03835	0.00115	0.0138651	yes
AT3G47990	AT3G47990	Chr3:17713093-17716828	q1	q2	OK	14.5024	33.4112	1.20404	3.46491	5e-05	0.00101408	yes
AT3G48520	AT3G48520	Chr3:17974852-17976774	q1	q2	OK	1.25656	3.50218	1.47878	2.52317	5e-05	0.00101408	yes
AT3G48650	AT3G48650	Chr3:18024659-18026235	q1	q2	OK	0.539617	1.84373	1.77262	2.22638	0.00045	0.00655982	yes
AT3G48830	AT3G48830	Chr3:18103140-18106460	q1	q2	OK	1.54276	3.14164	1.02601	1.99883	0.00115	0.0138651	yes
AT3G49320	AT3G49320	Chr3:18288171-18290672	q1	q2	OK	2.05477	4.33614	1.07743	2.08845	0.0003	0.00471339	yes
AT3G49530	AT3G49530	Chr3:18362442-18364959	q1	q2	OK	22.9979	66.7268	1.53676	4.60538	5e-05	0.00101408	yes
AT3G49570	AT3G49570	Chr3:18372403-18373147	q1	q2	OK	14.0274	68.3657	2.28502	5.90266	5e-05	0.00101408	yes
AT3G49580	AT3G49580	Chr3:18374907-18375940	q1	q2	OK	18.4961	61.9586	1.74408	4.58121	5e-05	0.00101408	yes
AT3G49890	AT3G49890	Chr3:18499163-18502778	q1	q2	OK	7.71794	16.5634	1.10171	1.95162	0.00095	0.0118929	yes
AT3G50060	AT3G50060	Chr3:18557606-18559326	q1	q2	OK	20.6612	65.7867	1.67087	4.59375	5e-05	0.00101408	yes
AT3G50560	AT3G50560	Chr3:18761005-18764056	q1	q2	OK	2.65088	5.62887	1.08638	2.17999	0.0003	0.00471339	yes
AT3G50800	AT3G50800	Chr3:18879892-18883033	q1	q2	OK	6.3426	31.4332	2.30914	2.2418	0.00195	0.0210261	yes
AT3G50930	AT3G50930	Chr3:18929525-18932181	q1	q2	OK	4.61673	16.1282	1.80464	4.94506	5e-05	0.00101408	yes
AT3G51240	AT3G51240	Chr3:19025109-19026872	q1	q2	OK	15.0315	76.5153	2.34775	6.73423	5e-05	0.00101408	yes
AT3G51380	AT3G51380	Chr3:19074035-19074815	q1	q2	OK	1.0759	3.39424	1.65755	1.93309	0.00435	0.0386159	yes
AT3G52400	AT3G52400	Chr3:19425631-19427230	q1	q2	OK	26.22	54.4218	1.05352	2.88527	5e-05	0.00101408	yes
AT3G52450	AT3G52450	Chr3:19440616-19442427	q1	q2	OK	2.09716	4.84124	1.20694	2.52927	5e-05	0.00101408	yes
AT3G52535	AT3G52535	Chr3:19483184-19489893	q1	q2	OK	0.984779	4.41378	2.16414	1.98952	0.0009	0.011376	yes
AT3G52670	AT3G52670	Chr3:19525094-19526803	q1	q2	OK	1.24354	2.52147	1.01981	1.76587	0.004	0.0364842	yes
AT3G52720	AT3G52720	Chr3:19538539-19542298	q1	q2	OK	17.1101	36.1662	1.07979	3.12402	5e-05	0.00101408	yes
AT3G52800	AT3G52800	Chr3:19569255-19570710	q1	q2	OK	70.3085	145.03	1.04458	3.03954	5e-05	0.00101408	yes
AT3G53260	AT3G53260	Chr3:19744017-19747114	q1	q2	OK	31.3486	70.0046	1.15905	3.52225	5e-05	0.00101408	yes
AT3G53940	AT3G53940	Chr3:19970928-19973769	q1	q2	OK	2.66417	6.38455	1.2609	2.8381	0.0001	0.00186768	yes
AT3G55120	AT3G55120	Chr3:20430058-20431597	q1	q2	OK	17.1399	59.3471	1.79182	5.17809	5e-05	0.00101408	yes
AT3G55980	AT3G55980	Chr3:20776219-20778952	q1	q2	OK	53.7182	261.54	2.28355	6.19039	5e-05	0.00101408	yes
AT3G56070	AT3G56070	Chr3:20806565-20808168	q1	q2	OK	32.7195	66.0529	1.01347	3.07796	5e-05	0.00101408	yes
AT3G56080	AT3G56080	Chr3:20810308-20813110	q1	q2	OK	5.94717	15.0582	1.34028	3.83996	5e-05	0.00101408	yes
AT3G56200	AT3G56200	Chr3:20849761-20852104	q1	q2	OK	13.7806	28.492	1.04792	2.96104	5e-05	0.00101408	yes
AT3G56290	AT3G56290	Chr3:20878445-20879783	q1	q2	OK	25.2611	65.3504	1.37128	4.05444	5e-05	0.00101408	yes
AT3G56990	AT3G56990	Chr3:21088026-21092169	q1	q2	OK	7.90944	15.9155	1.00878	3.02447	5e-05	0.00101408	yes
AT3G57450	AT3G57450	Chr3:21261045-21262763	q1	q2	OK	19.9916	62.1185	1.63563	4.68107	5e-05	0.00101408	yes
AT3G57530	AT3G57530	Chr3:21296456-21299704	q1	q2	OK	26.4894	85.0626	1.68311	4.67331	5e-05	0.00101408	yes
AT3G58270	AT3G58270	Chr3:21575748-21577845	q1	q2	OK	2.24917	8.66981	1.94661	4.12107	5e-05	0.00101408	yes
AT3G59080	AT3G59080	Chr3:21836405-21838620	q1	q2	OK	10.0916	22.4274	1.1521	2.95602	5e-05	0.00101408	yes
AT3G59900	AT3G59900	Chr3:22129504-22130472	q1	q2	OK	1.21602	2.7533	1.179	1.70819	0.00615	0.0496051	yes
AT3G61190	AT3G61190	Chr3:22650158-22652003	q1	q2	OK	3.07222	12.3568	2.00795	4.20864	5e-05	0.00101408	yes
AT3G62460	AT3G62460	Chr3:23100351-23105650	q1	q2	OK	7.8274	21.7438	1.474	2.90621	5e-05	0.00101408	yes
AT3TE94195:gene:1	AT3TE94195:gene:1	Chr3:23100351-23105650	q1	q2	OK	0.616171	2.60016	2.07719	2.5232	5e-05	0.00101408	yes
AT4G00050	AT4G00050	Chr4:17542-20183	q1	q2	OK	13.5593	41.2346	1.60458	4.50822	5e-05	0.00101408	yes
AT4G01360	AT4G01360	Chr4:564759-566408	q1	q2	OK	0.545934	2.05269	1.91072	2.57546	0.00055	0.00772999	yes
AT4G01540	AT4G01540	Chr4:670482-672789	q1	q2	OK	1.297	3.35554	1.37137	2.48424	5e-05	0.00101408	yes
AT4G01600	AT4G01600	Chr4:692852-694381	q1	q2	OK	4.68326	9.63095	1.04016	1.93978	0.0009	0.011376	yes
AT4G01720	AT4G01720	Chr4:744803-748554	q1	q2	OK	4.20337	9.78808	1.21948	3.18523	5e-05	0.00101408	yes
AT4G01985	AT4G01985	Chr4:866150-868253	q1	q2	OK	0.961449	3.12214	1.69925	2.74375	0.0002	0.00335767	yes
AT4G02075	AT4G02075	Chr4:913333-916509	q1	q2	OK	6.5914	14.727	1.15981	2.68356	0.0001	0.00186768	yes
AT4G02110	AT4G02110	Chr4:935005-940714	q1	q2	OK	2.71582	5.58307	1.03967	2.85237	5e-05	0.00101408	yes
AT4G02200	AT4G02200	Chr4:972706-976154	q1	q2	OK	10.6867	27.3863	1.35764	2.91134	5e-05	0.00101408	yes
AT4G02330	AT4G02330	Chr4:1032349-1037615	q1	q2	OK	3.37293	20.9793	2.63689	2.21168	0.0055	0.0457563	yes
AT4G02390	AT4G02390	Chr4:1049765-1054186	q1	q2	OK	2.82009	6.06501	1.10477	2.72977	5e-05	0.00101408	yes
AT4G04180	AT4G04180	Chr4:2020419-2024306	q1	q2	OK	1.64283	3.90657	1.24972	2.65729	5e-05	0.00101408	yes
AT4G04223	AT4G04223	Chr4:2036510-2037816	q1	q2	OK	7.13391	25.6626	1.8469	3.30964	5e-05	0.00101408	yes
AT4G04610	AT4G04610	Chr4:2324153-2328264	q1	q2	OK	81.0081	205.09	1.34012	3.80806	5e-05	0.00101408	yes
AT4G08040	AT4G08040	Chr4:4886961-4889224	q1	q2	OK	0.999617	4.32055	2.11177	3.48966	5e-05	0.00101408	yes
AT4G08950	AT4G08950	Chr4:5740218-5741591	q1	q2	OK	94.492	247.249	1.3877	2.96249	5e-05	0.00101408	yes
AT4G09820	AT4G09820	Chr4:6181880-6186523	q1	q2	OK	0.498969	2.34368	2.23175	3.46045	5e-05	0.00101408	yes
AT4G10120	AT4G10120	Chr4:6313913-6321688	q1	q2	OK	35.0986	114.713	1.70854	4.83101	5e-05	0.00101408	yes
AT4G11280	AT4G11280	Chr4:6863978-6866116	q1	q2	OK	20.1051	94.5027	2.23279	6.47991	5e-05	0.00101408	yes
AT4G11460	AT4G11460	Chr4:6963520-6967200	q1	q2	OK	0.382845	1.45613	1.92731	2.65245	5e-05	0.00101408	yes
AT4G11521	AT4G11521	Chr4:6985516-6986819	q1	q2	OK	0.819387	3.41179	2.05791	3.17318	5e-05	0.00101408	yes
AT4G12720	AT4G12720	Chr4:7487224-7490180	q1	q2	OK	29.347	127.264	2.11654	5.68972	5e-05	0.00101408	yes
AT4G13395	AT4G13395	Chr4:7785427-7786161	q1	q2	OK	8.64838	32.1026	1.89219	4.30744	5e-05	0.00101408	yes
AT4G13410	AT4G13410	Chr4:7791965-7796041	q1	q2	OK	2.5476	6.55996	1.36454	3.2068	5e-05	0.00101408	yes
AT4G14090	AT4G14090	Chr4:8120716-8123835	q1	q2	OK	6.61035	17.8377	1.43213	2.46515	0.00035	0.00538665	yes
AT4G14365	AT4G14365	Chr4:8271269-8273903	q1	q2	OK	4.27983	16.4933	1.94626	4.87385	5e-05	0.00101408	yes
AT4G14370	AT4G14370	Chr4:8279633-8283535	q1	q2	OK	0.580483	4.67476	3.00957	5.542	5e-05	0.00101408	yes
AT4G14690	AT4G14690	Chr4:8418241-8419325	q1	q2	OK	3.02665	14.6878	2.27882	4.4628	5e-05	0.00101408	yes
AT4G15710	AT4G15710	Chr4:8939176-8941406	q1	q2	OK	0.270915	0.902431	1.73598	2.14028	0.00245	0.0250393	yes
AT4G16690	AT4G16690	Chr4:9391963-9393650	q1	q2	OK	13.1725	27.4868	1.06121	3.12837	5e-05	0.00101408	yes
AT4G17490	AT4G17490	Chr4:9752823-9754161	q1	q2	OK	27.6544	67.2643	1.28233	3.51214	5e-05	0.00101408	yes
AT4G17500	AT4G17500	Chr4:9759202-9760391	q1	q2	OK	41.9299	84.0575	1.0034	3.05369	5e-05	0.00101408	yes
AT4G18253	AT4G18253	Chr4:10091100-10092224	q1	q2	OK	1.34767	3.33438	1.30695	1.97944	0.00215	0.0226223	yes
AT4G19130	AT4G19130	Chr4:10466406-10469329	q1	q2	OK	1.154	3.29045	1.51164	3.26032	5e-05	0.00101408	yes
AT4G19520	AT4G19520	Chr4:10639268-10647280	q1	q2	OK	13.8951	39.5707	1.50986	4.03089	5e-05	0.00101408	yes
AT4G20060	AT4G20060	Chr4:10854486-10859524	q1	q2	OK	1.21071	2.5728	1.08748	2.52457	5e-05	0.00101408	yes
AT4G20320	AT4G20320	Chr4:10974455-10979627	q1	q2	OK	15.1632	31.3982	1.0501	3.20262	5e-05	0.00101408	yes
AT4G20820	AT4G20820	Chr4:11150048-11152003	q1	q2	OK	4.0237	13.0285	1.69507	4.37909	5e-05	0.00101408	yes
AT4G21070	AT4G21070	Chr4:11247990-11252757	q1	q2	OK	2.70566	6.52978	1.27105	3.37944	5e-05	0.00101408	yes
AT4G21920	AT4G21920	Chr4:11635876-11636720	q1	q2	OK	1.02663	3.43162	1.74097	2.36188	0.0015	0.017096	yes
AT4G21940	AT4G21940	Chr4:11640734-11643762	q1	q2	OK	1.36393	2.91557	1.09601	2.18262	0.00045	0.00655982	yes
AT4G21990	AT4G21990	Chr4:11655561-11659167	q1	q2	OK	110.061	273	1.31059	3.62218	5e-05	0.00101408	yes
AT4G22390	AT4G22390	Chr4:11813312-11815164	q1	q2	OK	0.369395	1.45668	1.97945	2.0609	0.00085	0.0108987	yes
AT4G22513	AT4G22513	Chr4:11854795-11857417	q1	q2	OK	37.7037	96.0596	1.34922	2.24404	0.00035	0.00538665	yes
AT4G22710	AT4G22710	Chr4:11934968-11936823	q1	q2	OK	0.220233	1.34727	2.61294	2.86249	0.0025	0.0254574	yes
AT4G22880	AT4G22880	Chr4:12004725-12006209	q1	q2	OK	6.42991	45.3319	2.81766	7.2722	5e-05	0.00101408	yes
AT4G22950	AT4G22950	Chr4:12023823-12028450	q1	q2	OK	0.7313	3.41433	2.22307	1.98533	0.0008	0.0104491	yes
AT4G23210	AT4G23210	Chr4:12148672-12151638	q1	q2	OK	0.418001	0.995402	1.25177	1.74306	0.00215	0.0226223	yes
AT4G23770	AT4G23770	Chr4:12383163-12384496	q1	q2	OK	2.4933	5.25003	1.07427	1.99994	0.00125	0.0148514	yes
AT4G24110	AT4G24110	Chr4:12519906-12520898	q1	q2	OK	1.68116	7.59395	2.17539	3.63959	5e-05	0.00101408	yes
AT4G24380	AT4G24380	Chr4:12612377-12616238	q1	q2	OK	24.2483	74.1421	1.61241	3.07497	5e-05	0.00101408	yes
AT4G24570	AT4G24570	Chr4:12686458-12687650	q1	q2	OK	41.3255	165.238	1.99944	5.60242	5e-05	0.00101408	yes
AT4G25020	AT4G25020	Chr4:12860331-12861975	q1	q2	OK	1.29581	3.93255	1.60161	3.05472	5e-05	0.00101408	yes
AT4G25470	AT4G25470	Chr4:13015249-13016235	q1	q2	OK	2.88153	8.39297	1.54234	2.57731	5e-05	0.00101408	yes
AT4G25490	AT4G25490	Chr4:13021779-13022996	q1	q2	OK	2.14438	6.35025	1.56625	2.78304	5e-05	0.00101408	yes
AT4G25540	AT4G25540	Chr4:13038359-13048262	q1	q2	OK	0.415611	1.03077	1.31042	2.25383	0.00055	0.00772999	yes
AT4G25630	AT4G25630	Chr4:13074089-13076432	q1	q2	OK	26.1434	52.6066	1.0088	3.02104	5e-05	0.00101408	yes
AT4G25700	AT4G25700	Chr4:13093868-13096049	q1	q2	OK	40.8074	83.1618	1.02709	3.18956	5e-05	0.00101408	yes
AT4G25810	AT4G25810	Chr4:13128393-13129927	q1	q2	OK	6.61305	23.3132	1.81776	3.63155	5e-05	0.00101408	yes
AT4G26120	AT4G26120	Chr4:13236252-13238818	q1	q2	OK	0.437355	1.22683	1.48805	1.99722	0.0013	0.0153339	yes
AT4G26200	AT4G26200	Chr4:13275199-13277188	q1	q2	OK	0.19929	4.58791	4.52489	4.38124	0.0001	0.00186768	yes
AT4G26400	AT4G26400	Chr4:13342115-13346597	q1	q2	OK	19.0296	38.4401	1.01437	2.96157	5e-05	0.00101408	yes
AT4G27280	AT4G27280	Chr4:13663414-13664621	q1	q2	OK	33.7432	192.302	2.5107	7.09215	5e-05	0.00101408	yes
AT4G27652	AT4G27652	Chr4:13809778-13810462	q1	q2	OK	13.9574	34.5496	1.30764	2.99946	5e-05	0.00101408	yes
AT4G27654	AT4G27654	Chr4:13811611-13812126	q1	q2	OK	2.52536	18.6774	2.88673	3.72225	5e-05	0.00101408	yes
AT4G27657	AT4G27657	Chr4:13812988-13813701	q1	q2	OK	11.0168	34.8602	1.66187	3.80324	5e-05	0.00101408	yes
AT4G28020	AT4G28020	Chr4:13930341-13935479	q1	q2	OK	2.53226	6.01541	1.24824	1.74214	0.00435	0.0386159	yes
AT4G28350	AT4G28350	Chr4:14026576-14028622	q1	q2	OK	1.2322	2.56419	1.05727	2.02206	0.0013	0.0153339	yes
AT4G29780	AT4G29780	Chr4:14579562-14582605	q1	q2	OK	10.7828	61.3664	2.50871	6.98847	5e-05	0.00101408	yes
AT4G30280	AT4G30280	Chr4:14825756-14827211	q1	q2	OK	5.03354	58.4193	3.5368	7.44153	5e-05	0.00101408	yes
AT4G30290	AT4G30290	Chr4:14828711-14830224	q1	q2	OK	3.96155	31.227	2.97866	6.70735	5e-05	0.00101408	yes
AT4G30470	AT4G30470	Chr4:14894072-14896844	q1	q2	OK	13.7115	29.4497	1.10287	3.25827	5e-05	0.00101408	yes
AT4G31000	AT4G31000	Chr4:15103119-15105979	q1	q2	OK	3.85519	9.08049	1.23597	3.02234	5e-05	0.00101408	yes
AT4G31330	AT4G31330	Chr4:15202287-15203562	q1	q2	OK	2.35881	5.44929	1.20801	2.34792	0.0002	0.00335767	yes
AT4G31800	AT4G31800	Chr4:15382776-15385100	q1	q2	OK	22.268	110.795	2.31484	5.42209	5e-05	0.00101408	yes
AT4G31870	AT4G31870	Chr4:15410077-15412486	q1	q2	OK	2.69316	5.68803	1.07863	2.39997	0.0002	0.00335767	yes
AT4G32480	AT4G32480	Chr4:15676239-15677977	q1	q2	OK	33.6857	87.7845	1.38183	3.4922	5e-05	0.00101408	yes
AT4G32700	AT4G32700	Chr4:15767184-15779697	q1	q2	OK	2.19555	4.62951	1.07627	3.17507	5e-05	0.00101408	yes
AT4G32770	AT4G32770	Chr4:15804783-15808084	q1	q2	OK	15.1824	36.134	1.25096	3.78891	5e-05	0.00101408	yes
AT4G33050	AT4G33050	Chr4:15944198-15947072	q1	q2	OK	15.1868	38.7409	1.35104	3.90195	5e-05	0.00101408	yes
AT4G34150	AT4G34150	Chr4:16354856-16359565	q1	q2	OK	81.3482	218.086	1.42271	3.21465	5e-05	0.00101408	yes
AT4G34410	AT4G34410	Chr4:16451875-16454633	q1	q2	OK	1.76993	10.5816	2.57979	2.66092	0.0003	0.00471339	yes
AT4G34530	AT4G34530	Chr4:16498390-16502174	q1	q2	OK	5.76906	20.9512	1.86063	2.85243	0.00025	0.00405464	yes
AT4G35090	AT4G35090	Chr4:16698266-16703504	q1	q2	OK	184.468	396.92	1.10548	2.98836	5e-05	0.00101408	yes
AT4G35520	AT4G35520	Chr4:16865247-16871527	q1	q2	OK	0.403732	1.3146	1.70315	2.60166	5e-05	0.00101408	yes
AT4G35720	AT4G35720	Chr4:16927729-16929224	q1	q2	OK	1.12876	2.56321	1.18321	2.0062	0.0016	0.0180467	yes
AT4G36580	AT4G36580	Chr4:17257759-17260855	q1	q2	OK	2.03717	5.10245	1.32462	3.08179	5e-05	0.00101408	yes
AT4G37150	AT4G37150	Chr4:17492870-17494279	q1	q2	OK	2.38738	5.89513	1.30409	2.48854	0.00025	0.00405464	yes
AT4G37610	AT4G37610	Chr4:17668950-17672353	q1	q2	OK	40.0523	147.156	1.87739	4.97564	5e-05	0.00101408	yes
AT5G01100	AT5G01100	Chr5:34537-37999	q1	q2	OK	1.07876	3.3041	1.61489	3.24533	5e-05	0.00101408	yes
AT5G01510	AT5G01510	Chr5:201602-205679	q1	q2	OK	4.71053	10.4433	1.14862	3.12399	5e-05	0.00101408	yes
AT5G01660	AT5G01660	Chr5:244249-249207	q1	q2	OK	0.935847	1.87921	1.00578	1.88077	0.0017	0.0188491	yes
AT5G04720	AT5G04720	Chr5:1360588-1363907	q1	q2	OK	18.273	45.2132	1.30703	3.84125	5e-05	0.00101408	yes
AT5G05270	AT5G05270	Chr5:1563285-1565324	q1	q2	OK	19.763	85.1753	2.10763	6.27819	5e-05	0.00101408	yes
AT5G06320	AT5G06320	Chr5:1928342-1931782	q1	q2	OK	156.096	354.549	1.18355	3.34888	5e-05	0.00101408	yes
AT5G06350	AT5G06350	Chr5:1938411-1944366	q1	q2	OK	5.82754	12.3887	1.08806	3.18628	5e-05	0.00101408	yes
AT5G06710	AT5G06710	Chr5:2067940-2070566	q1	q2	OK	3.66854	7.49271	1.03028	2.45746	5e-05	0.00101408	yes
AT5G07380	AT5G07380	Chr5:2332435-2339913	q1	q2	OK	0.356963	0.975169	1.44988	1.41744	0.006	0.0486556	yes
AT5G07990	AT5G07990	Chr5:2560327-2563137	q1	q2	OK	2.55624	10.2087	1.9977	4.80521	5e-05	0.00101408	yes
AT5G08600	AT5G08600	Chr5:2786176-2790241	q1	q2	OK	1.24344	4.8673	1.96878	4.40228	5e-05	0.00101408	yes
AT5G08640	AT5G08640	Chr5:2803832-2805606	q1	q2	OK	16.6012	79.1154	2.25267	6.56344	5e-05	0.00101408	yes
AT5G09420	AT5G09420	Chr5:2928172-2933423	q1	q2	OK	1.88275	4.19084	1.1544	2.56374	5e-05	0.00101408	yes
AT5G09570	AT5G09570	Chr5:2970497-2972222	q1	q2	OK	0.468765	7.47999	3.9961	4.17101	5e-05	0.00101408	yes
AT5G09876	AT5G09876	Chr5:3079886-3080435	q1	q2	OK	0.450049	4.73239	3.39442	2.42172	0.00335	0.0316915	yes
AT5G11200	AT5G11200	Chr5:3567173-3574970	q1	q2	OK	51.3513	108.394	1.07781	3.28376	5e-05	0.00101408	yes
AT5G11260	AT5G11260	Chr5:3593334-3595073	q1	q2	OK	11.3634	25.8612	1.18639	3.17152	5e-05	0.00101408	yes
AT5G11410	AT5G11410	Chr5:3638190-3639965	q1	q2	OK	0.93748	5.27834	2.49322	4.04955	5e-05	0.00101408	yes
AT5G11650	AT5G11650	Chr5:3744697-3747198	q1	q2	OK	6.77609	14.7869	1.1258	3.11467	5e-05	0.00101408	yes
AT5G12920	AT5G12920	Chr5:4077161-4082634	q1	q2	OK	1.29423	2.93153	1.17956	2.04285	0.00025	0.00405464	yes
AT5G13060	AT5G13060	Chr5:4142909-4147140	q1	q2	OK	2.57079	5.68543	1.14506	2.78774	5e-05	0.00101408	yes
AT5G13360	AT5G13360	Chr5:4283355-4286342	q1	q2	OK	6.01025	12.6762	1.07662	3.03948	5e-05	0.00101408	yes
AT5G13930	AT5G13930	Chr5:4488475-4500735	q1	q2	OK	46.792	320.362	2.77537	4.53958	5e-05	0.00101408	yes
AT5G14580	AT5G14580	Chr5:4697206-4703091	q1	q2	OK	2.40261	4.83341	1.00844	2.61188	5e-05	0.00101408	yes
AT5G14930	AT5G14930	Chr5:4828498-4830982	q1	q2	OK	5.38715	12.8133	1.25005	2.62539	5e-05	0.00101408	yes
AT5G15500	AT5G15500	Chr5:5031647-5033540	q1	q2	OK	6.71855	13.5882	1.01613	2.73641	5e-05	0.00101408	yes
AT5G16930	AT5G16930	Chr5:5568387-5572405	q1	q2	OK	3.14716	7.03151	1.15978	2.56321	5e-05	0.00101408	yes
AT5G17040	AT5G17040	Chr5:5605200-5607128	q1	q2	OK	0.326776	1.13298	1.79374	1.95813	0.00205	0.0218162	yes
AT5G17050	AT5G17050	Chr5:5607787-5609589	q1	q2	OK	14.0013	43.4513	1.63384	4.82738	5e-05	0.00101408	yes
AT5G17300	AT5G17300	Chr5:5690224-5692992	q1	q2	OK	1.87684	4.65532	1.31057	2.71849	5e-05	0.00101408	yes
AT5G17310	AT5G17310	Chr5:5696477-5700993	q1	q2	OK	27.5824	62.1206	1.17132	3.6013	5e-05	0.00101408	yes
AT5G17350	AT5G17350	Chr5:5718497-5719608	q1	q2	OK	1.88291	14.2638	2.92132	5.35707	5e-05	0.00101408	yes
AT5G17780	AT5G17780	Chr5:5867168-5869065	q1	q2	OK	1.03641	5.06071	2.28775	4.02727	5e-05	0.00101408	yes
AT5G18065	AT5G18065	Chr5:5978545-5980599	q1	q2	OK	1.99089	6.64539	1.73894	3.42878	5e-05	0.00101408	yes
AT5G18270	AT5G18270	Chr5:6040918-6043014	q1	q2	OK	1.74417	3.66842	1.07262	2.09208	0.00045	0.00655982	yes
AT5G18290	AT5G18290	Chr5:6055027-6058368	q1	q2	OK	4.13295	10.3433	1.32345	2.85761	0.0001	0.00186768	yes
AT5G18670	AT5G18670	Chr5:6225955-6230630	q1	q2	OK	11.3808	37.2773	1.7117	2.96037	5e-05	0.00101408	yes
AT5G18810	AT5G18810	Chr5:6268643-6271325	q1	q2	OK	1.15912	2.63534	1.18496	1.74956	0.00335	0.0316916	yes
AT5G19240	AT5G19240	Chr5:6470071-6471636	q1	q2	OK	25.0884	69.1405	1.46251	4.22788	5e-05	0.00101408	yes
AT5G19260	AT5G19260	Chr5:6479397-6480729	q1	q2	OK	3.07035	7.04957	1.19913	2.58399	0.0001	0.00186768	yes
AT5G19850	AT5G19850	Chr5:6709733-6711723	q1	q2	OK	12.1188	29.1972	1.26858	3.66298	5e-05	0.00101408	yes
AT5G20150	AT5G20150	Chr5:6802281-6803655	q1	q2	OK	16.3466	76.4579	2.22567	6.32805	5e-05	0.00101408	yes
AT5G20220	AT5G20220	Chr5:6821880-6826112	q1	q2	OK	11.9972	34.7576	1.53464	4.40244	5e-05	0.00101408	yes
AT5G20230	AT5G20230	Chr5:6826364-6827748	q1	q2	OK	35.27	82.4563	1.22519	2.79227	5e-05	0.00101408	yes
AT5G20240	AT5G20240	Chr5:6828903-6831515	q1	q2	OK	0.621923	1.7545	1.49626	1.89915	0.0026	0.0262844	yes
AT5G20790	AT5G20790	Chr5:7039673-7040919	q1	q2	OK	5.72406	25.9384	2.17998	3.38708	5e-05	0.00101408	yes
AT5G22250	AT5G22250	Chr5:7365476-7366799	q1	q2	OK	4.09517	12.3681	1.59463	3.48568	5e-05	0.00101408	yes
AT5G23730	AT5G23730	Chr5:8005096-8006630	q1	q2	OK	3.2017	6.6129	1.04644	2.36129	0.0001	0.00186768	yes
AT5G24210	AT5G24210	Chr5:8217121-8219720	q1	q2	OK	24.1444	65.6902	1.44399	4.30929	5e-05	0.00101408	yes
AT5G24280	AT5G24280	Chr5:8251219-8262788	q1	q2	OK	1.03298	4.82138	2.22263	5.51651	5e-05	0.00101408	yes
AT5G24590	AT5G24590	Chr5:8416374-8419076	q1	q2	OK	15.0491	37.3003	1.30951	3.87362	5e-05	0.00101408	yes
AT5G24660	AT5G24660	Chr5:8443278-8444101	q1	q2	OK	26.0161	95.2777	1.87273	5.34049	5e-05	0.00101408	yes
AT5G24850	AT5G24850	Chr5:8535257-8538211	q1	q2	OK	6.10125	19.0847	1.64524	4.61821	5e-05	0.00101408	yes
AT5G25190	AT5G25190	Chr5:8706744-8707885	q1	q2	OK	16.1067	54.2757	1.75265	4.40717	5e-05	0.00101408	yes
AT5G25230	AT5G25230	Chr5:8739544-8743880	q1	q2	OK	0.196332	2.13276	3.44135	4.48962	5e-05	0.00101408	yes
AT5G25350	AT5G25350	Chr5:8793017-8798010	q1	q2	OK	29.6101	59.5601	1.00826	3.06647	5e-05	0.00101408	yes
AT5G26030	AT5G26030	Chr5:9096450-9101682	q1	q2	OK	29.0565	61.7262	1.08702	3.05399	5e-05	0.00101408	yes
AT5G26170	AT5G26170	Chr5:9146878-9148391	q1	q2	OK	1.15115	2.55173	1.1484	1.70646	0.0046	0.0402875	yes
AT5G26220	AT5G26220	Chr5:9162968-9164884	q1	q2	OK	6.44277	34.7623	2.43177	6.04286	5e-05	0.00101408	yes
AT5G26860	AT5G26860	Chr5:9450951-9457000	q1	q2	OK	8.6887	18.7004	1.10585	3.38074	5e-05	0.00101408	yes
AT5G26920	AT5G26920	Chr5:9475678-9478777	q1	q2	OK	5.43021	19.0183	1.80831	5.01226	5e-05	0.00101408	yes
AT5G27420	AT5G27420	Chr5:9683987-9685742	q1	q2	OK	5.28061	17.9502	1.76522	4.68905	5e-05	0.00101408	yes
AT5G27660	AT5G27660	Chr5:9789467-9792378	q1	q2	OK	1.07668	2.55009	1.24396	2.15224	0.0005	0.00718182	yes
AT5G28030	AT5G28030	Chr5:10029631-10032962	q1	q2	OK	2.19132	8.53243	1.96116	3.80096	5e-05	0.00101408	yes
AT5G35935	AT5G35935	Chr5:14083273-14089891	q1	q2	OK	0.138065	1.52916	3.46932	5.67818	5e-05	0.00101408	yes
AT5G37550	AT5G37550	Chr5:14918900-14920025	q1	q2	OK	0.602004	3.31212	2.45991	3.13751	0.00015	0.00266679	yes
AT5G37770	AT5G37770	Chr5:14997146-14999619	q1	q2	OK	67.8837	181.6	1.41962	3.92634	5e-05	0.00101408	yes
AT5G38240	AT5G38240	Chr5:15274325-15279384	q1	q2	OK	0.684646	2.40069	1.81002	3.01896	5e-05	0.00101408	yes
AT5G38565	AT5G38565	Chr5:15444309-15446297	q1	q2	OK	0.294713	0.964514	1.71049	1.92112	0.00525	0.044221	yes
AT5G39190	AT5G39190	Chr5:15692541-15693735	q1	q2	OK	1.75587	3.55297	1.01684	1.6218	0.0062	0.0498852	yes
AT5G39580	AT5G39580	Chr5:15847064-15849141	q1	q2	OK	3.28943	12.8977	1.9712	3.74132	5e-05	0.00101408	yes
AT5G39610	AT5G39610	Chr5:15858397-15859911	q1	q2	OK	2.58669	6.71969	1.37729	2.86117	5e-05	0.00101408	yes
AT5G39670	AT5G39670	Chr5:15883178-15886526	q1	q2	OK	2.13798	13.3286	2.64021	3.73981	5e-05	0.00101408	yes
AT5G39850	AT5G39850	Chr5:15949909-15951546	q1	q2	OK	7.02036	14.413	1.03775	2.50436	5e-05	0.00101408	yes
AT5G40460	AT5G40460	Chr5:16202141-16203358	q1	q2	OK	1.29756	2.95629	1.18798	1.97708	0.0019	0.0205776	yes
AT5G40540	AT5G40540	Chr5:16236955-16239601	q1	q2	OK	1.44014	3.60303	1.323	2.64458	5e-05	0.00101408	yes
AT5G41080	AT5G41080	Chr5:16441654-16444023	q1	q2	OK	9.4538	30.6893	1.69877	3.69138	5e-05	0.00101408	yes
AT5G41550	AT5G41550	Chr5:16617231-16620824	q1	q2	OK	0.106043	1.17006	3.46387	3.86499	5e-05	0.00101408	yes
AT5G41740	AT5G41740	Chr5:16688625-16693119	q1	q2	OK	2.49827	19.57	2.96964	7.72864	5e-05	0.00101408	yes
AT5G41750	AT5G41750	Chr5:16693831-16699028	q1	q2	OK	1.58062	10.6851	2.75704	6.75834	5e-05	0.00101408	yes
AT5G41761	AT5G41761	Chr5:16711041-16712069	q1	q2	OK	1.00541	5.38815	2.42201	3.5966	5e-05	0.00101408	yes
AT5G42380	AT5G42380	Chr5:16942446-16943820	q1	q2	OK	1.07299	7.02387	2.71063	4.58005	5e-05	0.00101408	yes
AT5G42460	AT5G42460	Chr5:16979772-16981195	q1	q2	OK	2.31086	4.7012	1.0246	2.08671	0.0007	0.00939986	yes
AT5G42800	AT5G42800	Chr5:17164092-17166032	q1	q2	OK	5.86847	48.578	3.04925	8.08639	5e-05	0.00101408	yes
AT5G43620	AT5G43620	Chr5:17522485-17524003	q1	q2	OK	3.36154	9.62198	1.51721	3.49624	5e-05	0.00101408	yes
AT5G43630	AT5G43630	Chr5:17526659-17530605	q1	q2	OK	7.45638	17.6243	1.24102	3.69693	5e-05	0.00101408	yes
AT5G44110	AT5G44110	Chr5:17753958-17755768	q1	q2	OK	9.59474	22.1103	1.2044	3.25384	5e-05	0.00101408	yes
AT5G44490	AT5G44490	Chr5:17923851-17925843	q1	q2	OK	2.11249	6.10342	1.53067	3.24541	5e-05	0.00101408	yes
AT5G44568	AT5G44568	Chr5:17961018-17962276	q1	q2	OK	3.44843	8.91655	1.37055	2.38808	0.00035	0.00538665	yes
AT5G44980	AT5G44980	Chr5:18160203-18162264	q1	q2	OK	0.354118	1.6086	2.1835	2.40563	5e-05	0.00101408	yes
AT5G45340	AT5G45340	Chr5:18368531-18371021	q1	q2	OK	4.27095	36.2749	3.08634	7.65562	5e-05	0.00101408	yes
AT5G45630	AT5G45630	Chr5:18505535-18506382	q1	q2	OK	0.929221	10.6557	3.51945	4.76017	5e-05	0.00101408	yes
AT5G45990	AT5G45990	Chr5:18651264-18654075	q1	q2	OK	0.302964	1.27809	2.07677	2.84575	5e-05	0.00101408	yes
AT5G46490	AT5G46490	Chr5:18850644-18858552	q1	q2	OK	12.8547	27.5392	1.09919	2.80736	5e-05	0.00101408	yes
AT5G46710	AT5G46710	Chr5:18950842-18954692	q1	q2	OK	15.5272	41.0278	1.4018	2.00095	0.00315	0.0302969	yes
AT5G47220	AT5G47220	Chr5:19171642-19172956	q1	q2	OK	25.2346	63.2587	1.32586	3.92706	5e-05	0.00101408	yes
AT5G47230	AT5G47230	Chr5:19179880-19181182	q1	q2	OK	8.16434	34.5929	2.08307	5.16461	5e-05	0.00101408	yes
AT5G47610	AT5G47610	Chr5:19301129-19302117	q1	q2	OK	3.96093	9.098	1.19971	2.44633	0.0001	0.00186768	yes
AT5G47910	AT5G47910	Chr5:19397040-19402061	q1	q2	OK	18.4193	53.2373	1.53122	4.47909	5e-05	0.00101408	yes
AT5G48850	AT5G48850	Chr5:19805436-19807853	q1	q2	OK	7.92371	56.4683	2.83319	7.32968	5e-05	0.00101408	yes
AT5G48880	AT5G48880	Chr5:19813345-19817955	q1	q2	OK	32.4706	68.8967	1.0853	2.82506	5e-05	0.00101408	yes
AT5G49190	AT5G49190	Chr5:19943180-19947588	q1	q2	OK	0.661517	1.34587	1.02469	1.84957	0.0018	0.0197788	yes
AT5G49330	AT5G49330	Chr5:19998822-20001572	q1	q2	OK	2.08141	6.53552	1.65074	3.49446	5e-05	0.00101408	yes
AT5G49390	AT5G49390	Chr5:20023441-20030387	q1	q2	OK	1.40359	2.88911	1.04151	2.15089	0.0001	0.00186768	yes
AT5G49520	AT5G49520	Chr5:20090647-20093346	q1	q2	OK	1.50682	6.70634	2.15402	4.50313	5e-05	0.00101408	yes
AT5G49700	AT5G49700	Chr5:20189654-20193800	q1	q2	OK	1.19373	2.42964	1.02526	1.71066	0.0037	0.0343556	yes
AT5G50335	AT5G50335	Chr5:20489032-20489727	q1	q2	OK	12.7157	26.9934	1.08599	2.6222	5e-05	0.00101408	yes
AT5G50340	AT5G50340	Chr5:20491392-20496589	q1	q2	OK	8.7049	20.242	1.21745	3.60794	5e-05	0.00101408	yes
AT5G50915	AT5G50915	Chr5:20710102-20712473	q1	q2	OK	13.2598	41.3477	1.64075	4.65478	5e-05	0.00101408	yes
AT5G51470	AT5G51470	Chr5:20907194-20909533	q1	q2	OK	0.578859	1.30586	1.17372	1.77675	0.00325	0.0309849	yes
AT5G51540	AT5G51540	Chr5:20932030-20936413	q1	q2	OK	2.72555	6.26534	1.20085	2.97148	5e-05	0.00101408	yes
AT5G51920	AT5G51920	Chr5:21097075-21098959	q1	q2	OK	0.53565	1.54353	1.52687	2.33196	0.00085	0.0108987	yes
AT5G52020	AT5G52020	Chr5:21123957-21125065	q1	q2	OK	0.306146	2.01035	2.71515	2.66482	0.00225	0.0233981	yes
AT5G52050	AT5G52050	Chr5:21138702-21140876	q1	q2	OK	4.13947	11.3697	1.45768	3.74534	5e-05	0.00101408	yes
AT5G52750	AT5G52750	Chr5:21383978-21385015	q1	q2	OK	4.03266	19.0019	2.23634	4.44048	5e-05	0.00101408	yes
AT5G52760	AT5G52760	Chr5:21386726-21387714	q1	q2	OK	1.20393	11.9424	3.31027	4.61591	5e-05	0.00101408	yes
AT5G52940	AT5G52940	Chr5:21472102-21473602	q1	q2	OK	1.39277	2.7862	1.00034	1.79503	0.0037	0.0343556	yes
AT5G54060	AT5G54060	Chr5:21936745-21938396	q1	q2	OK	2.16024	9.16853	2.0855	4.55468	5e-05	0.00101408	yes
AT5G54130	AT5G54130	Chr5:21962569-21965623	q1	q2	OK	2.35031	7.68785	1.70973	3.95418	5e-05	0.00101408	yes
AT5G54490	AT5G54490	Chr5:22121018-22122122	q1	q2	OK	3.74529	10.5262	1.49083	3.13131	5e-05	0.00101408	yes
AT5G54710	AT5G54710	Chr5:22227482-22230663	q1	q2	OK	9.40673	50.3187	2.41933	6.16696	5e-05	0.00101408	yes
AT5G54720	AT5G54720	Chr5:22230805-22232949	q1	q2	OK	3.25338	21.3103	2.71154	5.80778	5e-05	0.00101408	yes
AT5G54730	AT5G54730	Chr5:22233788-22237370	q1	q2	OK	11.3222	26.8754	1.24714	3.75485	5e-05	0.00101408	yes
AT5G56370	AT5G56370	Chr5:22835930-22837972	q1	q2	OK	1.64257	3.94093	1.26259	2.4967	0.0001	0.00186768	yes
AT5G56700	AT5G56700	Chr5:22941749-22943587	q1	q2	OK	0.42363	2.22835	2.3951	3.00293	5e-05	0.00101408	yes
AT5G56840	AT5G56840	Chr5:22980637-22983426	q1	q2	OK	0.997658	2.37573	1.25176	1.7963	0.0045	0.0396599	yes
AT5G57220	AT5G57220	Chr5:23187839-23189902	q1	q2	OK	5.50049	13.4384	1.28873	2.94045	5e-05	0.00101408	yes
AT5G57320	AT5G57320	Chr5:23211951-23218041	q1	q2	OK	0.520496	1.90537	1.87211	3.47223	5e-05	0.00101408	yes
AT5G58120	AT5G58120	Chr5:23517255-23523818	q1	q2	OK	4.61749	18.8556	2.02981	2.6206	0.0003	0.00471339	yes
AT5G58370	AT5G58370	Chr5:23593058-23599353	q1	q2	OK	7.10021	15.8998	1.16307	2.00106	0.00165	0.0184093	yes
AT5G58390	AT5G58390	Chr5:23599469-23601404	q1	q2	OK	14.7186	31.7918	1.11102	3.26262	5e-05	0.00101408	yes
AT5G58430	AT5G58430	Chr5:23621151-23623543	q1	q2	OK	35.4014	74.3053	1.06966	3.1633	5e-05	0.00101408	yes
AT5G58760	AT5G58760	Chr5:23730449-23733707	q1	q2	OK	3.71436	8.6823	1.22496	3.15439	5e-05	0.00101408	yes
AT5G59550	AT5G59550	Chr5:23998163-24000166	q1	q2	OK	21.8891	44.4948	1.02342	3.04931	5e-05	0.00101408	yes
AT5G59732	AT5G59732	Chr5:24063874-24066215	q1	q2	OK	22.576	47.921	1.08587	3.10098	5e-05	0.00101408	yes
AT5G59820	AT5G59820	Chr5:24102813-24103794	q1	q2	OK	17.862	65.238	1.86882	5.24701	5e-05	0.00101408	yes
AT5G60040	AT5G60040	Chr5:24173258-24185629	q1	q2	OK	3.147	6.83927	1.11986	2.80385	5e-05	0.00101408	yes
AT5G60250	AT5G60250	Chr5:24252137-24256285	q1	q2	OK	0.337119	5.12732	3.92687	6.97149	5e-05	0.00101408	yes
AT5G60610	AT5G60610	Chr5:24363512-24366376	q1	q2	OK	0.521039	2.98737	2.51941	3.27138	5e-05	0.00101408	yes
AT5G60730	AT5G60730	Chr5:24422443-24430413	q1	q2	OK	0.814166	1.84067	1.17683	1.8411	0.00265	0.0265977	yes
AT5G60800	AT5G60800	Chr5:24460718-24462595	q1	q2	OK	8.18702	17.66	1.10907	2.98549	5e-05	0.00101408	yes
AT5G61070	AT5G61070	Chr5:24571094-24574387	q1	q2	OK	0.535319	1.47184	1.45915	2.3206	0.00055	0.00772999	yes
AT5G61600	AT5G61600	Chr5:24766343-24767732	q1	q2	OK	43.8517	125.572	1.51782	4.49692	5e-05	0.00101408	yes
AT5G61900	AT5G61900	Chr5:24855620-24864172	q1	q2	OK	11.5221	32.9952	1.51786	3.01643	5e-05	0.00101408	yes
AT5G62020	AT5G62020	Chr5:24915806-24917643	q1	q2	OK	7.08883	14.9145	1.0731	2.91314	5e-05	0.00101408	yes
AT5G62165	AT5G62165	Chr5:24964645-24968607	q1	q2	OK	0.435101	0.956239	1.13602	0.652732	0.00555	0.0460354	yes
AT5G62210	AT5G62210	Chr5:24986293-24987811	q1	q2	OK	10.1181	34.8086	1.78251	4.96235	5e-05	0.00101408	yes
AT5G62470	AT5G62470	Chr5:25078990-25081141	q1	q2	OK	7.08538	15.6013	1.13875	3.1144	5e-05	0.00101408	yes
AT5G63090	AT5G63090	Chr5:25308138-25311019	q1	q2	OK	2.32608	5.08223	1.12756	2.07535	0.0008	0.0104491	yes
AT5G63130	AT5G63130	Chr5:25322974-25324739	q1	q2	OK	0.973473	2.67019	1.45573	2.4274	0.0001	0.00186768	yes
AT5G64060	AT5G64060	Chr5:25633454-25635789	q1	q2	OK	0.509777	2.78462	2.44954	3.64749	5e-05	0.00101408	yes
AT5G64660	AT5G64660	Chr5:25841912-25843555	q1	q2	OK	7.51243	18.6253	1.30992	3.61412	5e-05	0.00101408	yes
AT5G64870	AT5G64870	Chr5:25929431-25931384	q1	q2	OK	0.896121	3.63609	2.02062	3.58651	5e-05	0.00101408	yes
AT5G65300	AT5G65300	Chr5:26095142-26096430	q1	q2	OK	2.81201	8.92509	1.66626	3.20058	5e-05	0.00101408	yes
AT5G65350	AT5G65350	Chr5:26119210-26119825	q1	q2	OK	2.04382	7.57818	1.89058	2.58048	0.0003	0.00471339	yes
AT5G65870	AT5G65870	Chr5:26351372-26352703	q1	q2	OK	8.07844	19.0825	1.2401	3.17741	5e-05	0.00101408	yes
AT5G66070	AT5G66070	Chr5:26419377-26423240	q1	q2	OK	19.4673	45.0039	1.209	1.95002	0.002	0.0214237	yes
AT5G66210	AT5G66210	Chr5:26453275-26459654	q1	q2	OK	25.261	59.0831	1.22583	2.18634	0.00235	0.024245	yes
AT5G66270	AT5G66270	Chr5:26473085-26475839	q1	q2	OK	1.09243	2.3644	1.11393	2.09394	0.0014	0.0161631	yes
AT5G66640	AT5G66640	Chr5:26599350-26602034	q1	q2	OK	0.243729	0.961395	1.97985	1.39894	0.001	0.0123687	yes
AT5G66650	AT5G66650	Chr5:26603002-26607579	q1	q2	OK	1.26258	5.40156	2.097	5.0582	5e-05	0.00101408	yes
AT5G66675	AT5G66675	Chr5:26614808-26617034	q1	q2	OK	9.5047	19.9297	1.0682	3.11115	5e-05	0.00101408	yes
AT5G67060	AT5G67060	Chr5:26765991-26767257	q1	q2	OK	0.317557	2.27495	2.84075	2.57838	0.0004	0.00598686	yes
AT5G67450	AT5G67450	Chr5:26918764-26920179	q1	q2	OK	0.688446	1.87532	1.44572	2.08922	0.00155	0.0176044	yes
